# Supplementary material for: High rates of evolution preceded shifts to sex-biased gene expression in Leucadendron, the most sexually dimorphic angiosperms
Source: eLife journal article supplement (doi:10.7554/elife.67485), 2021-11-02

brunioides.F, difference of means = 0.201, perm. p = 0.005

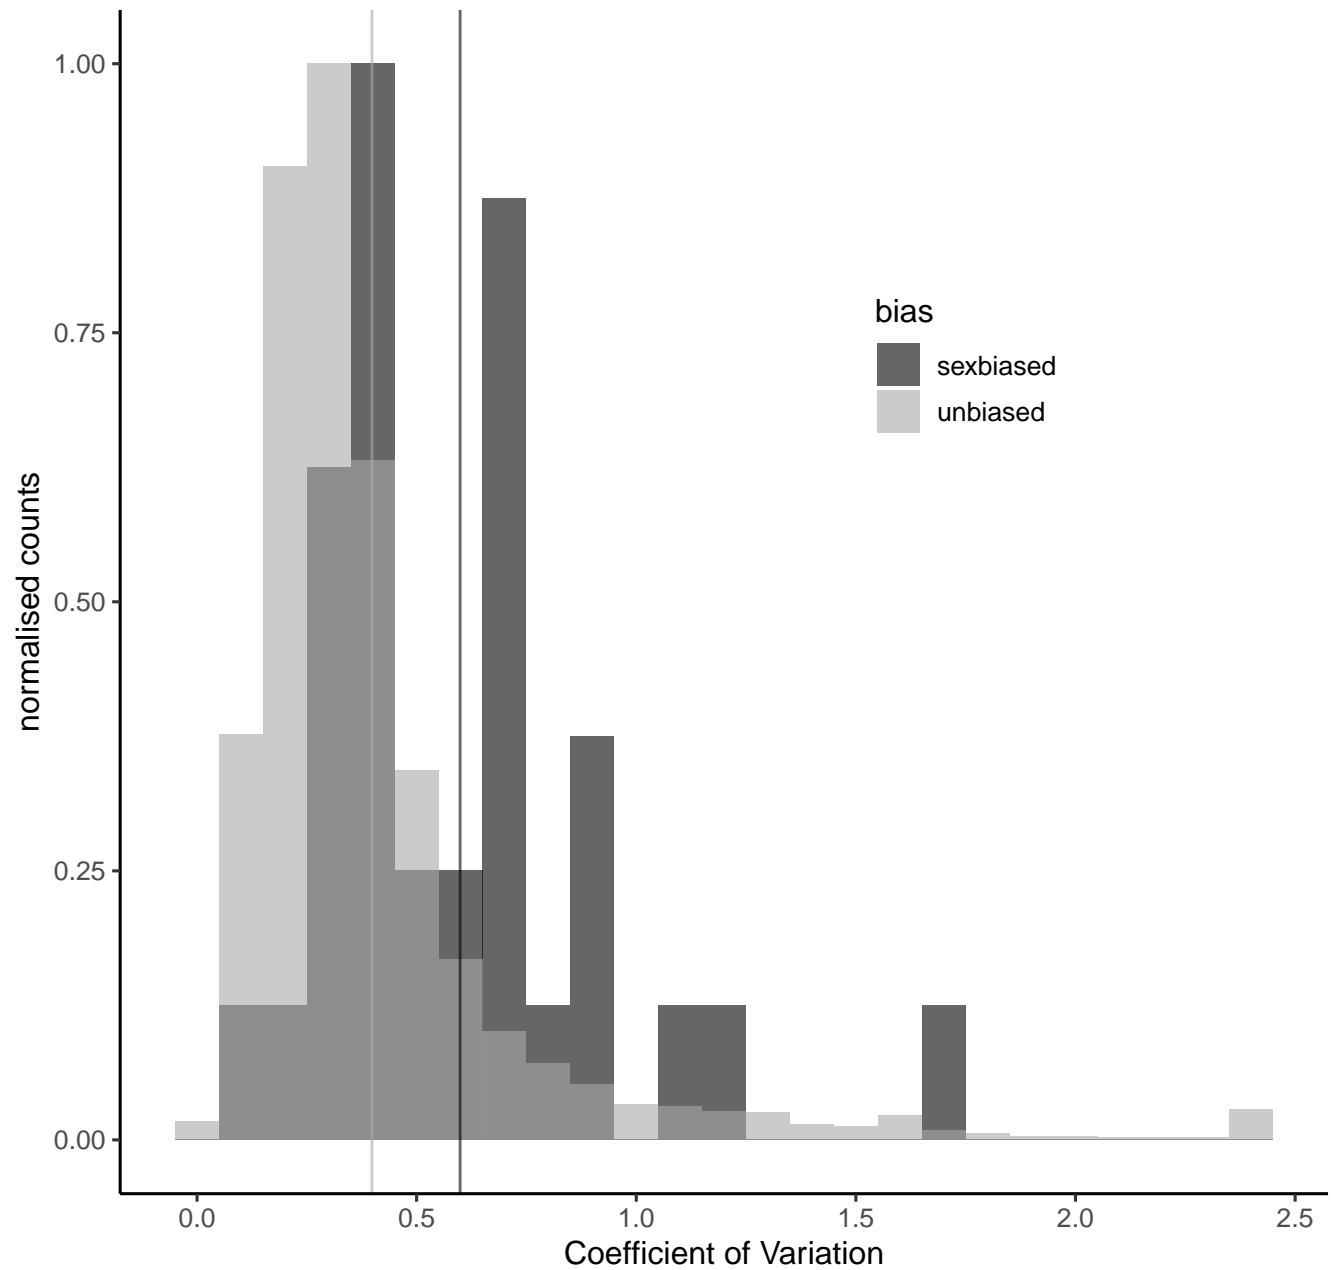

brunioides.M, difference of means = 0.228, perm. p = 0.001

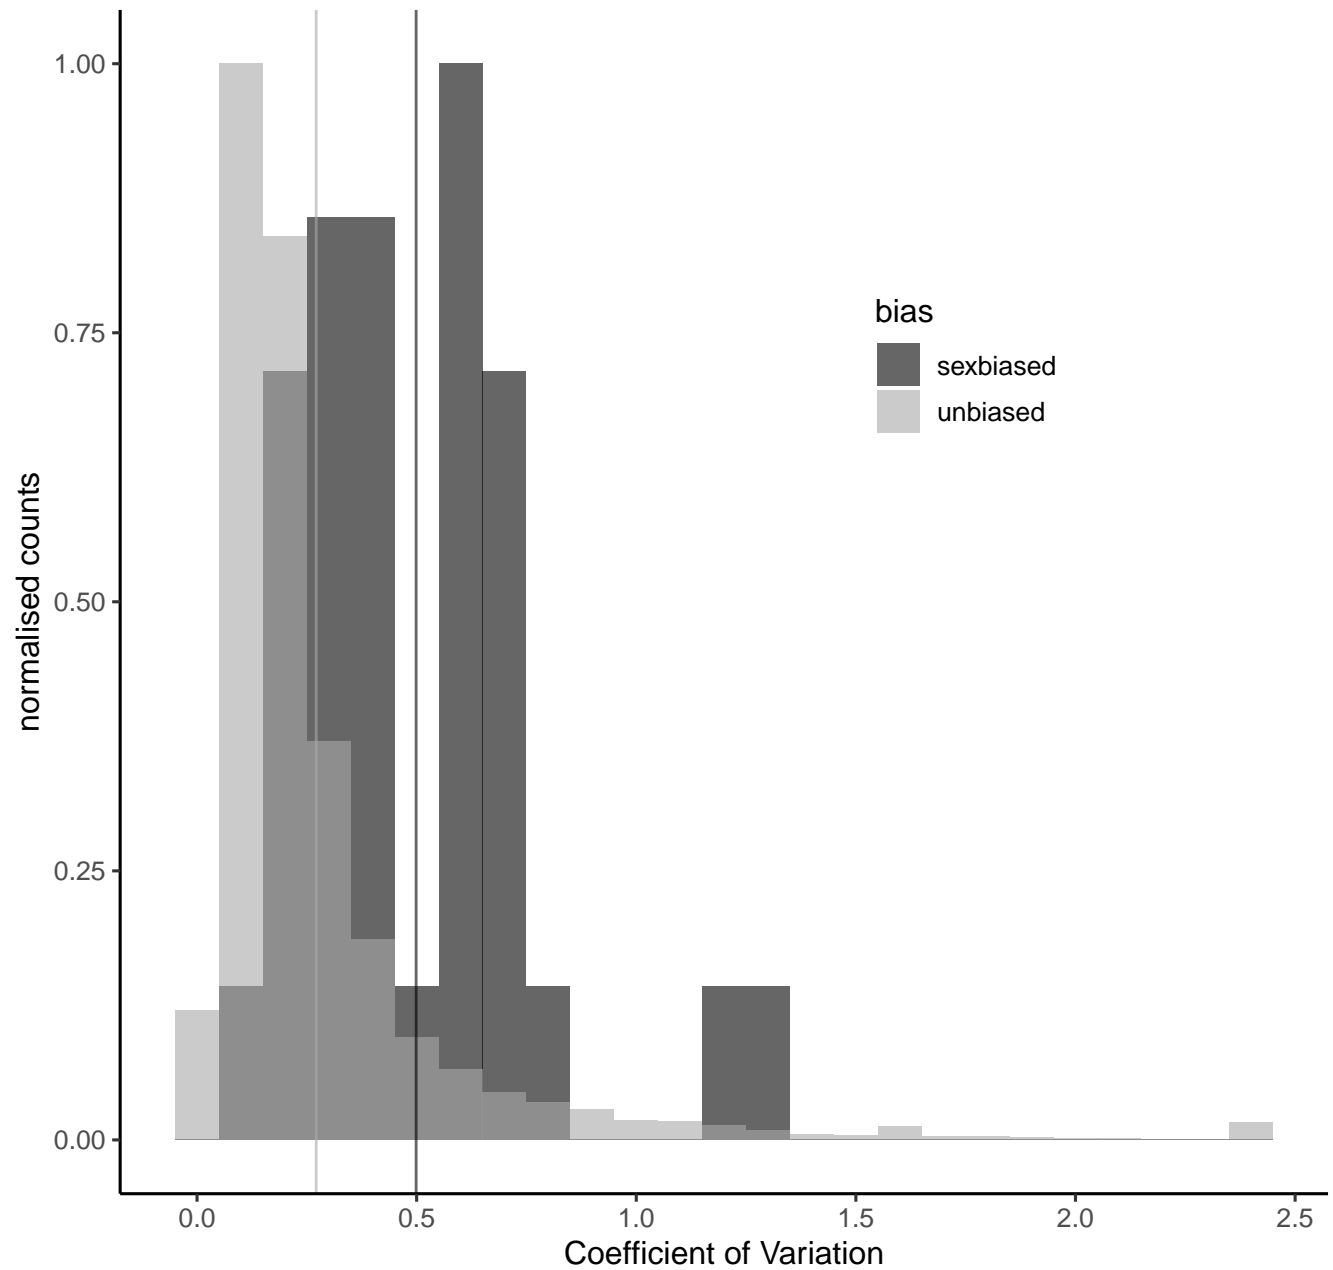

dubium.F, difference of means = 0.089, perm. p = 0

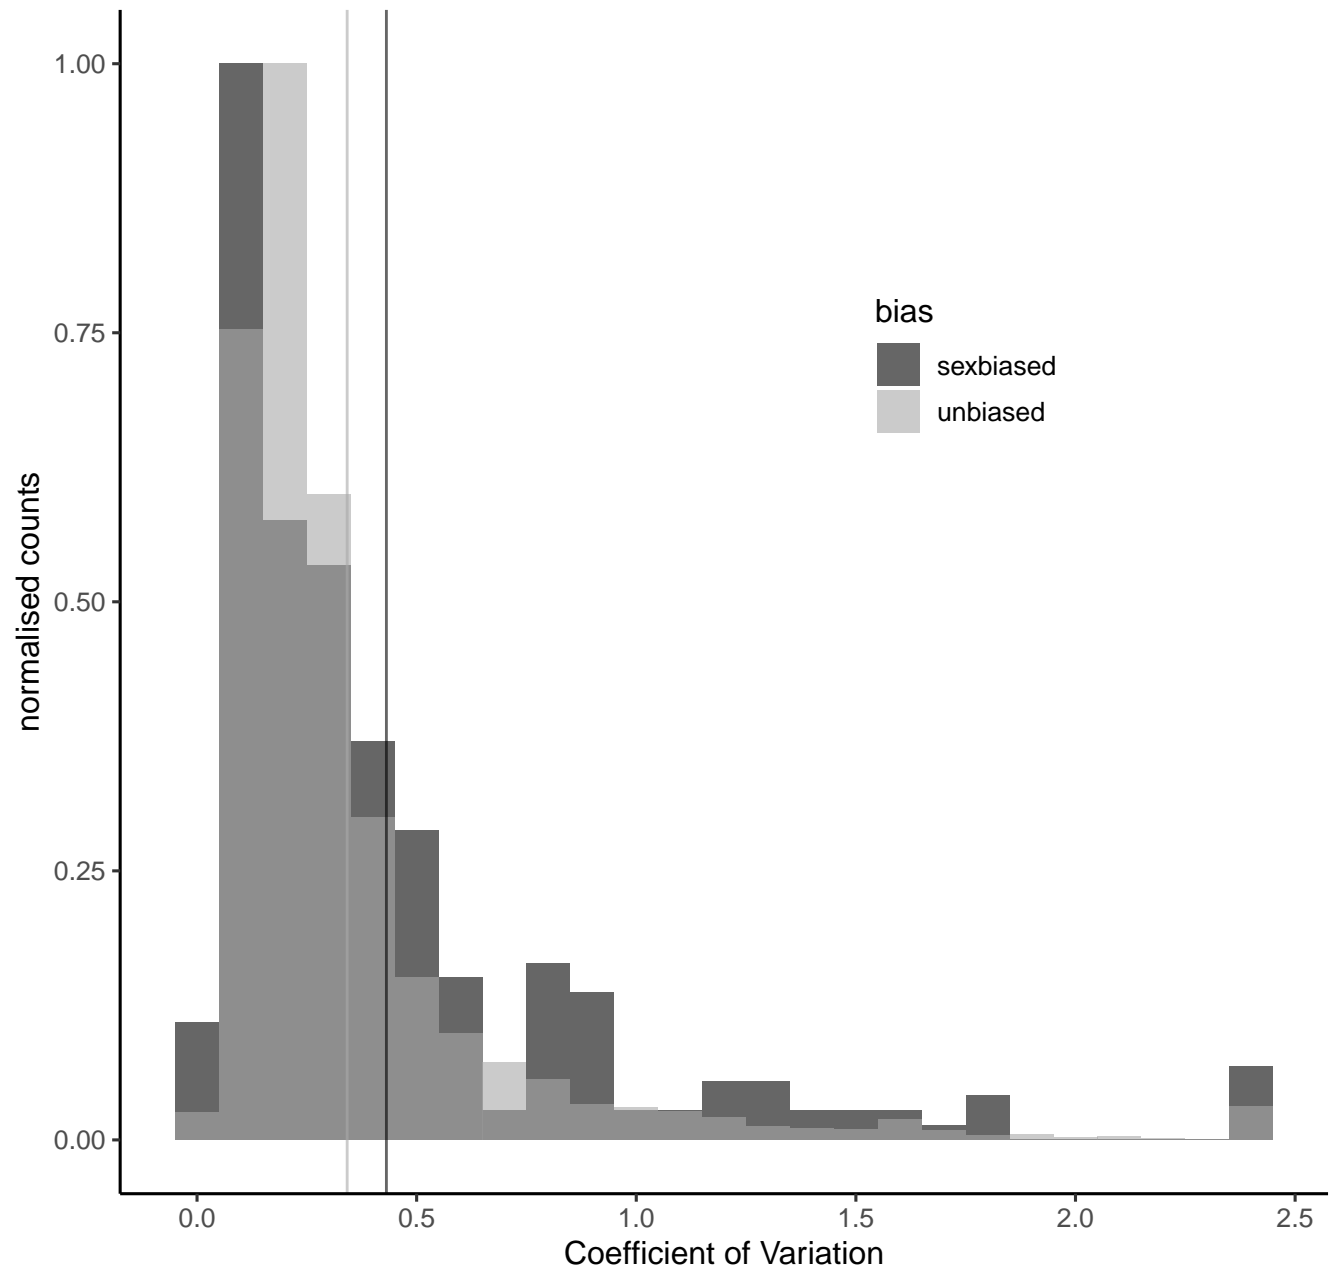

dubium.M, difference of means = 0.045, perm. p = 0.024

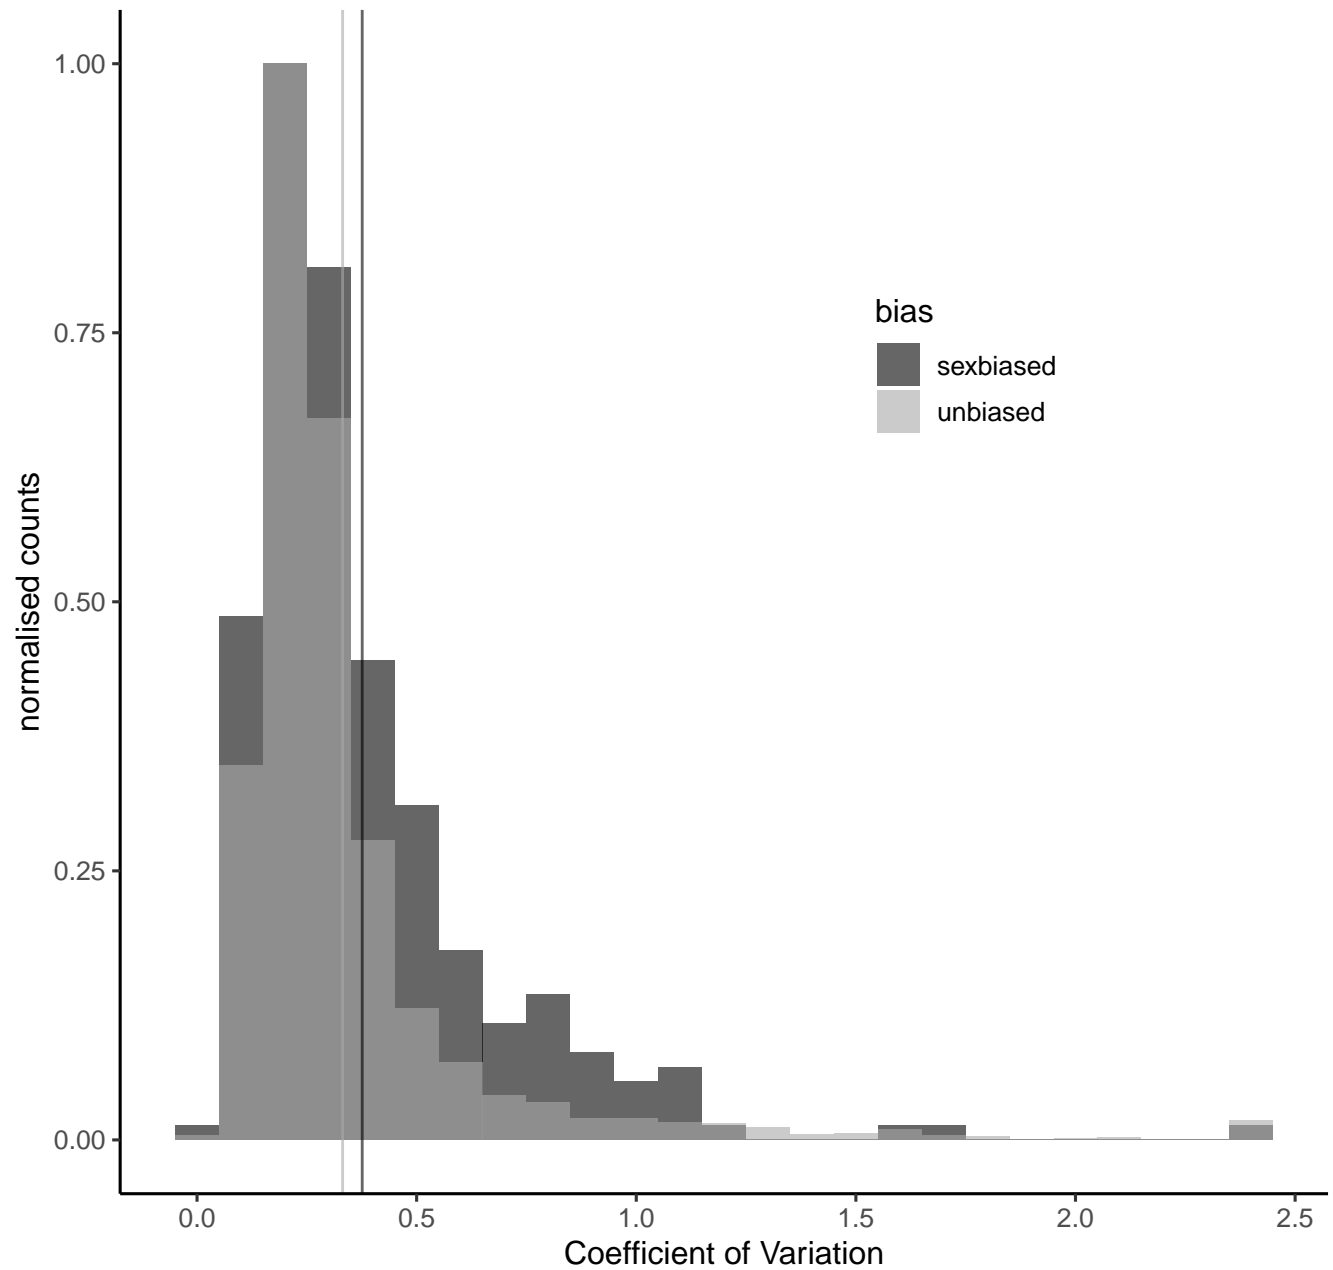

ericifolium.F, difference of means = 0.186, perm. p = 0.125

normalised counts

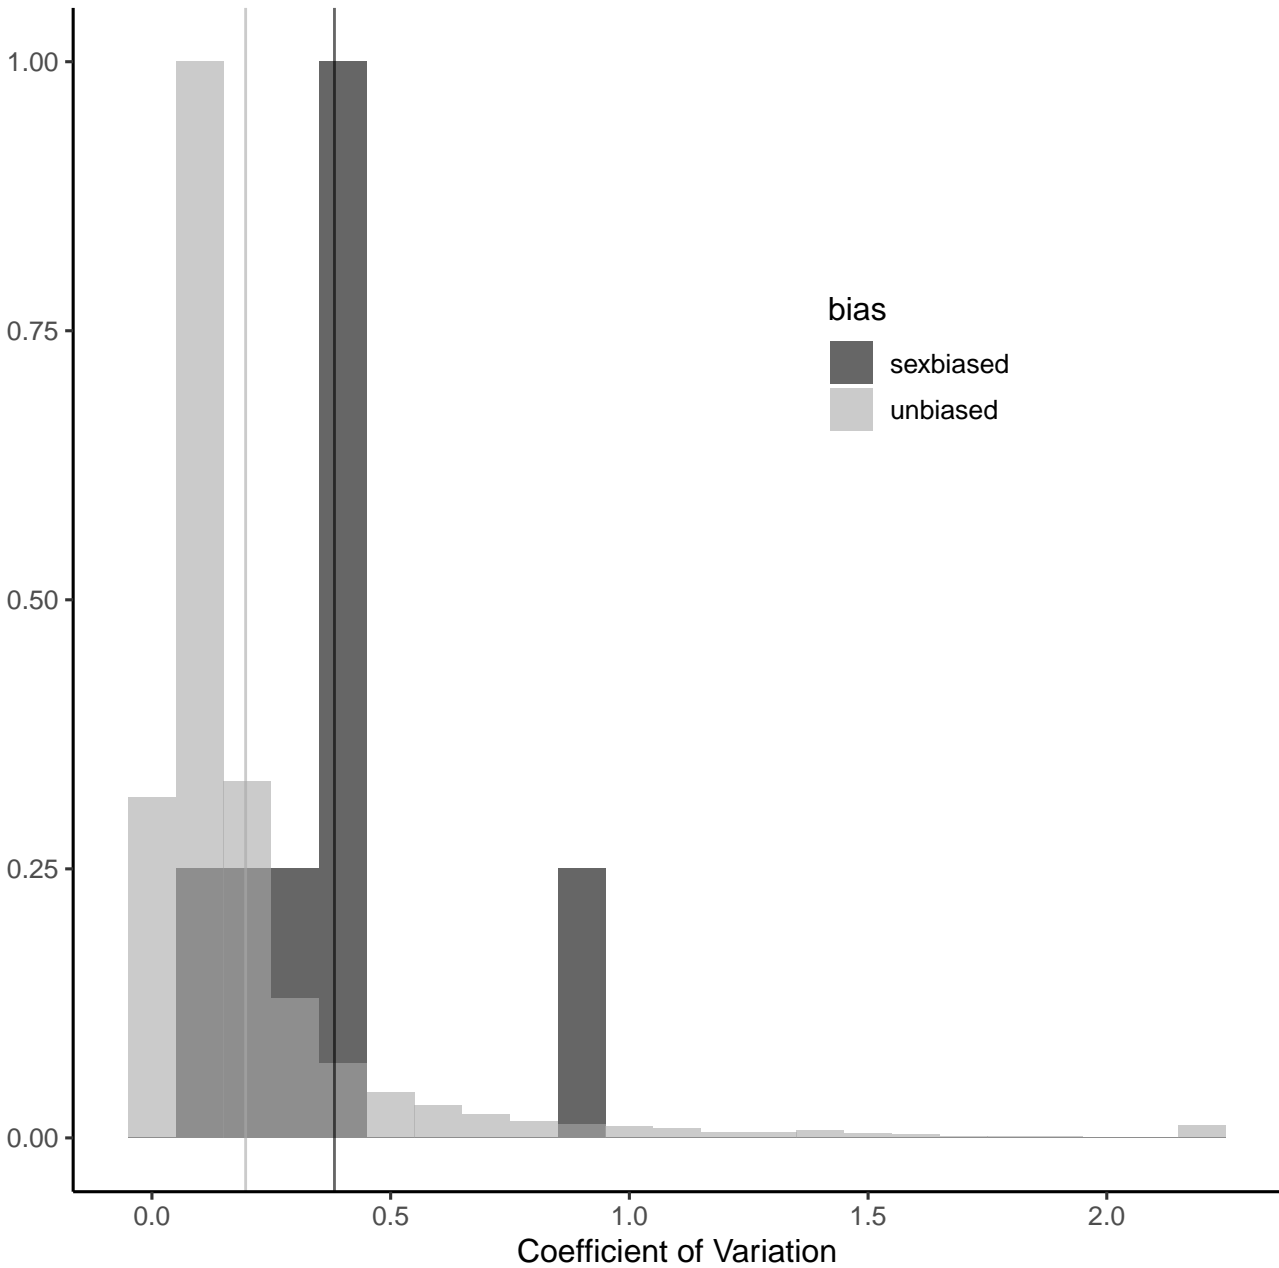

ericifolium.M, difference of means = 0.419, perm. p = 0.002

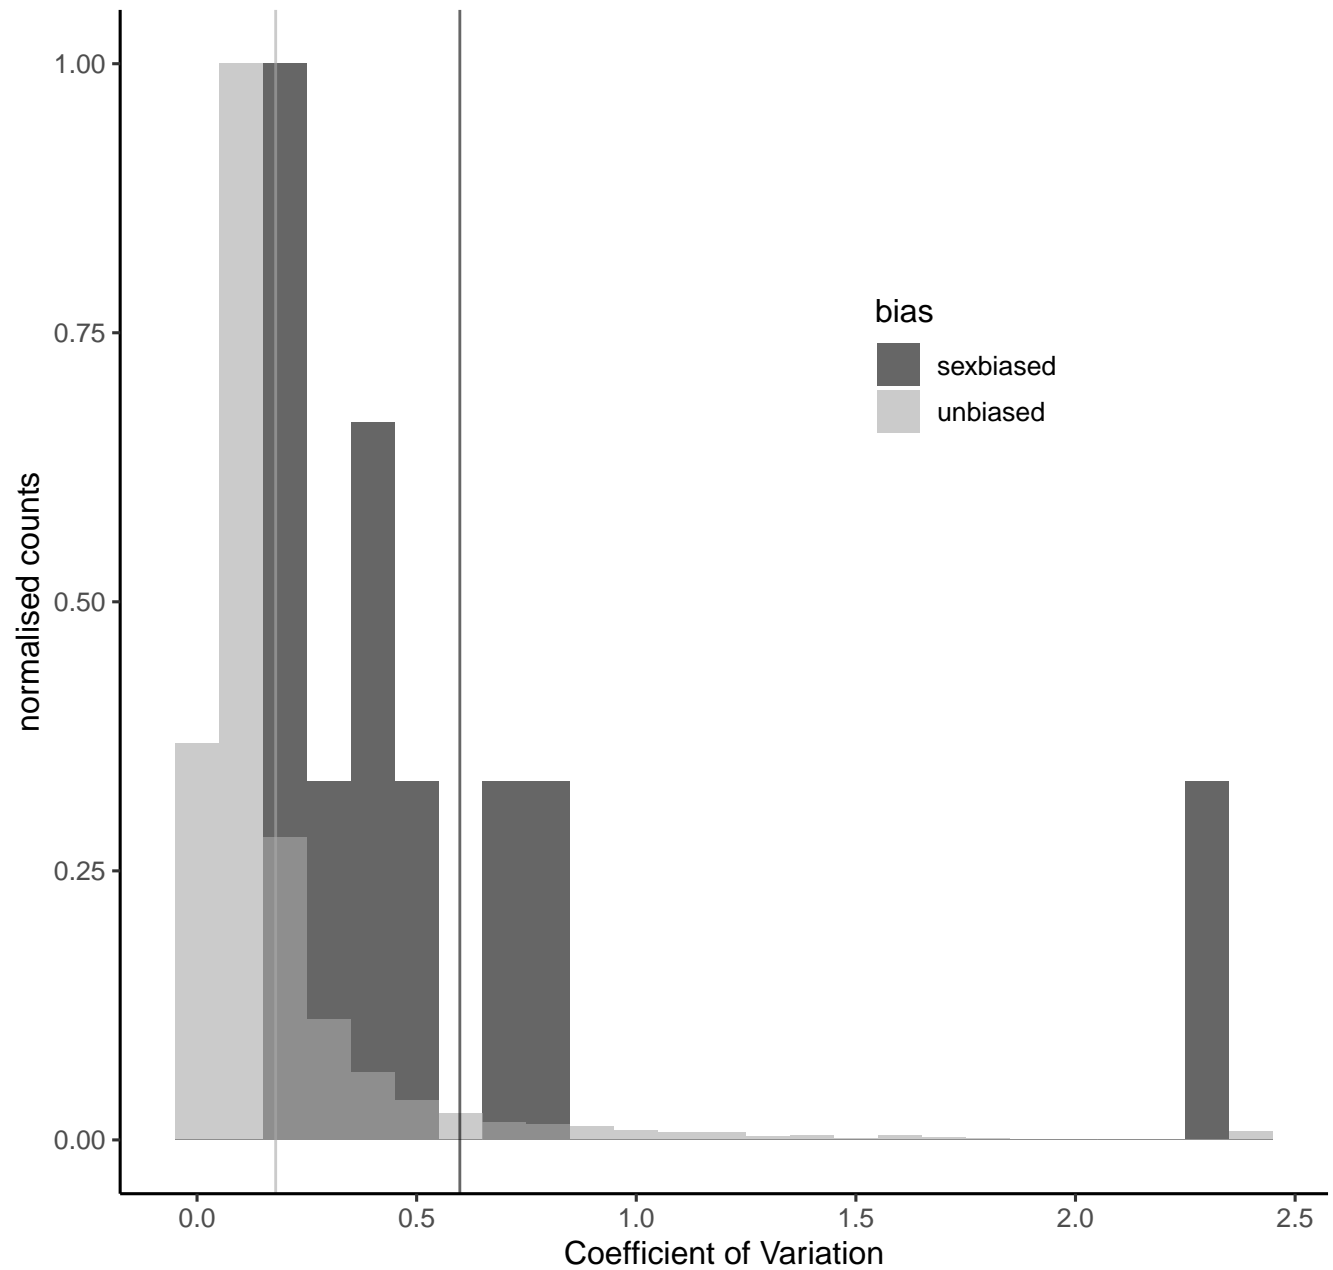

linifolium.F, difference of means = 0.01, perm. p = 0.847

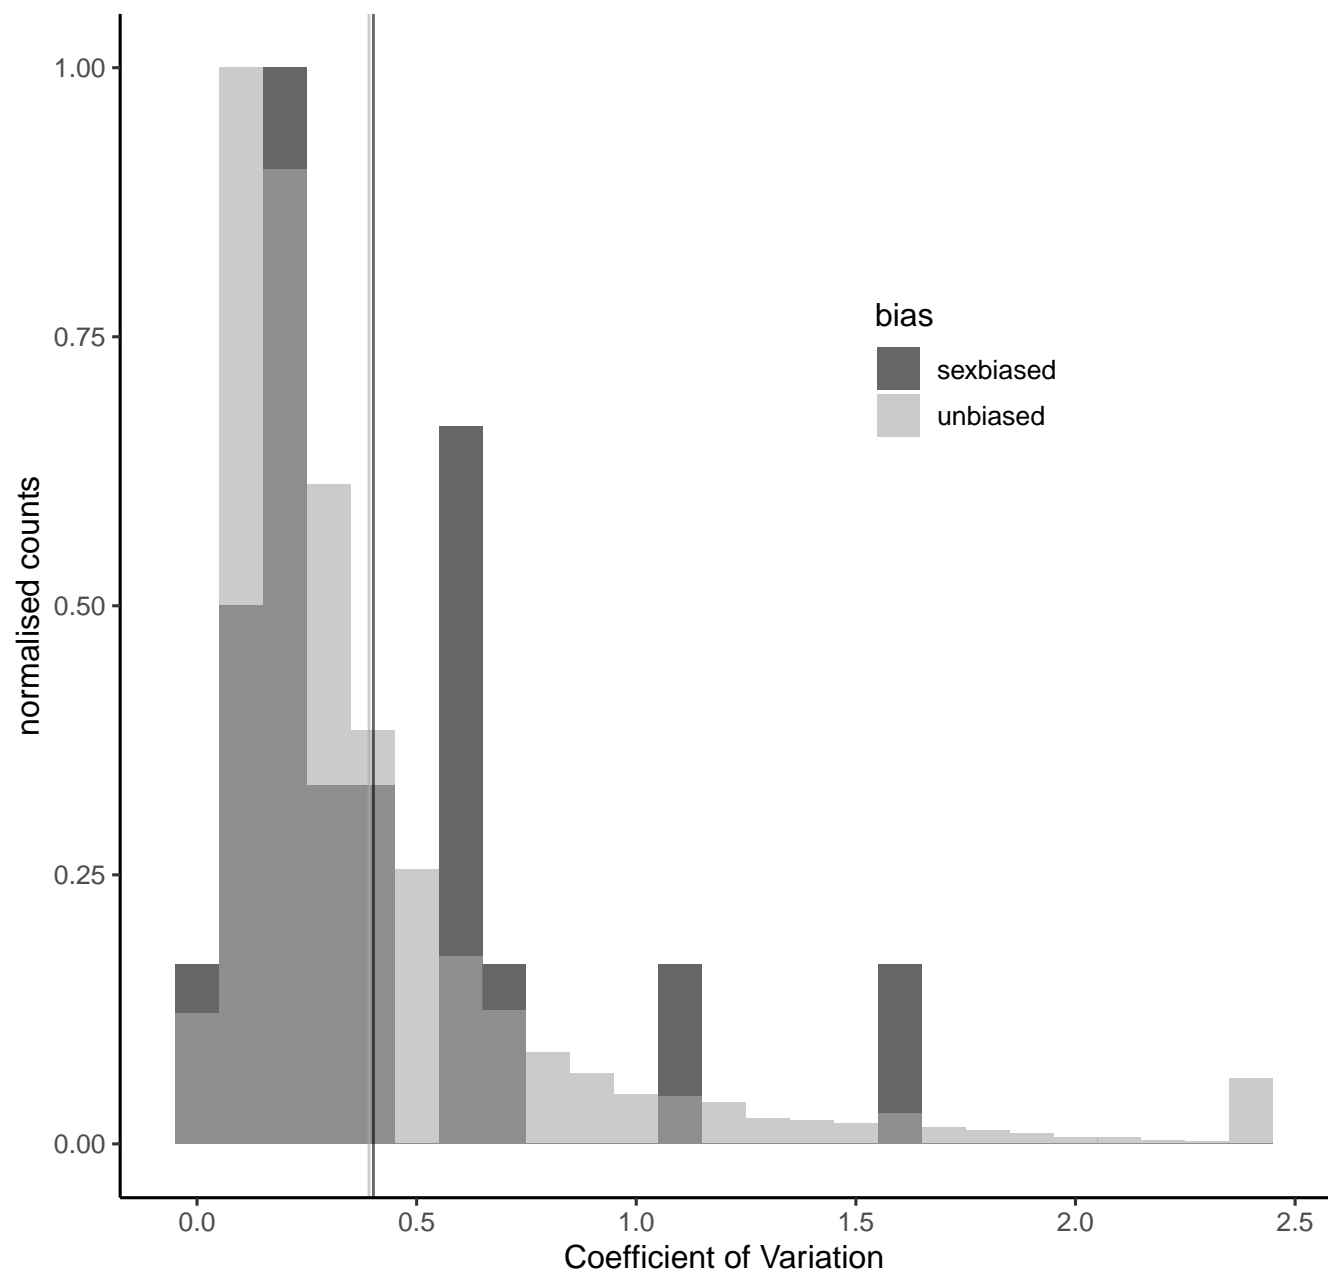

linifolium.M, difference of means = 0.119, perm. p = 0.139

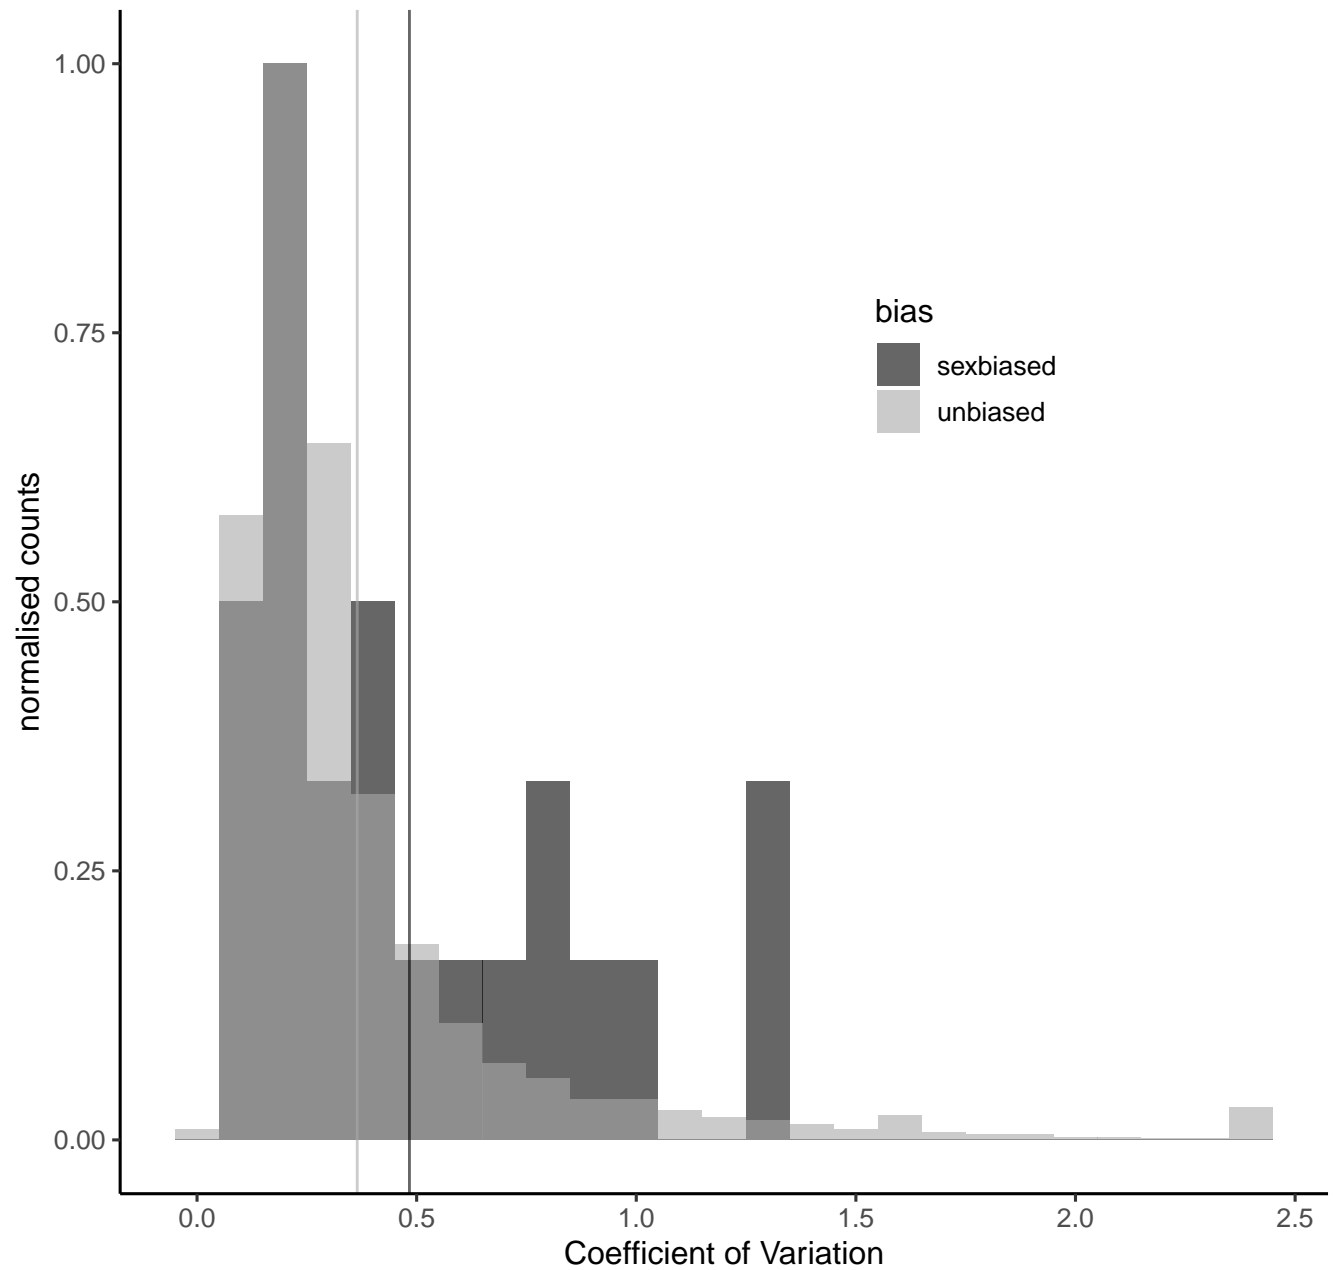



muirii.F, difference of means = 0.184, perm. p = 0.055

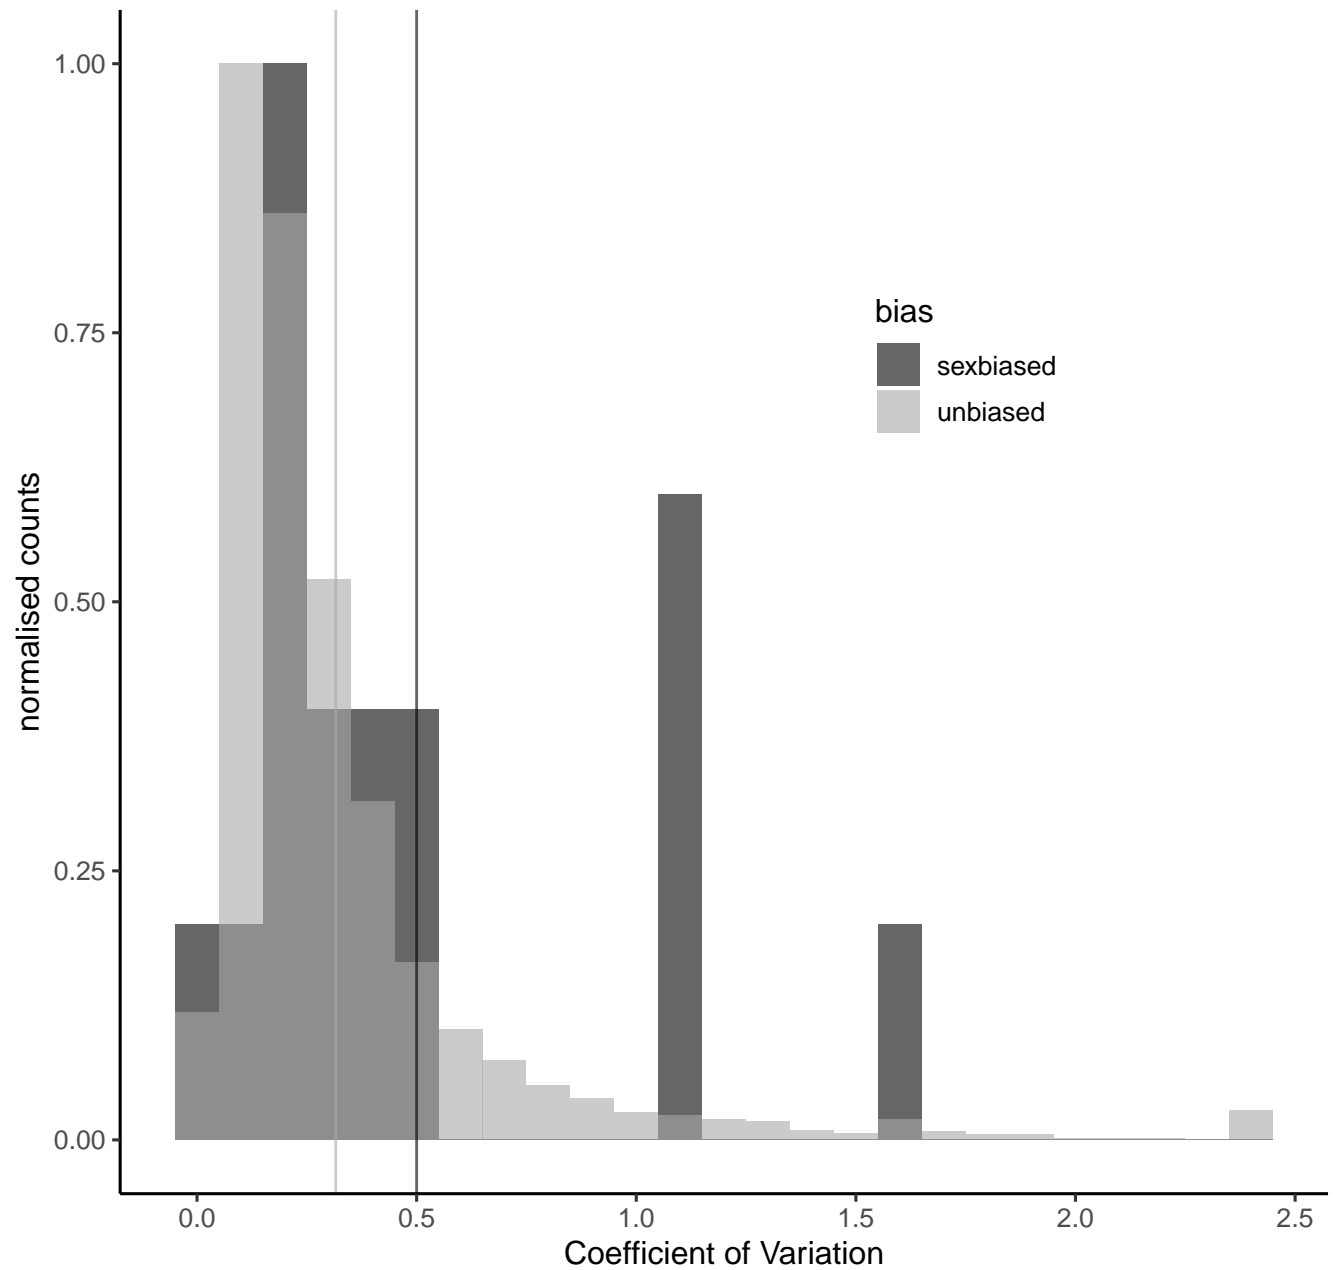

muirii.M, difference of means = 0.123, perm. p = 0.271

normalised counts

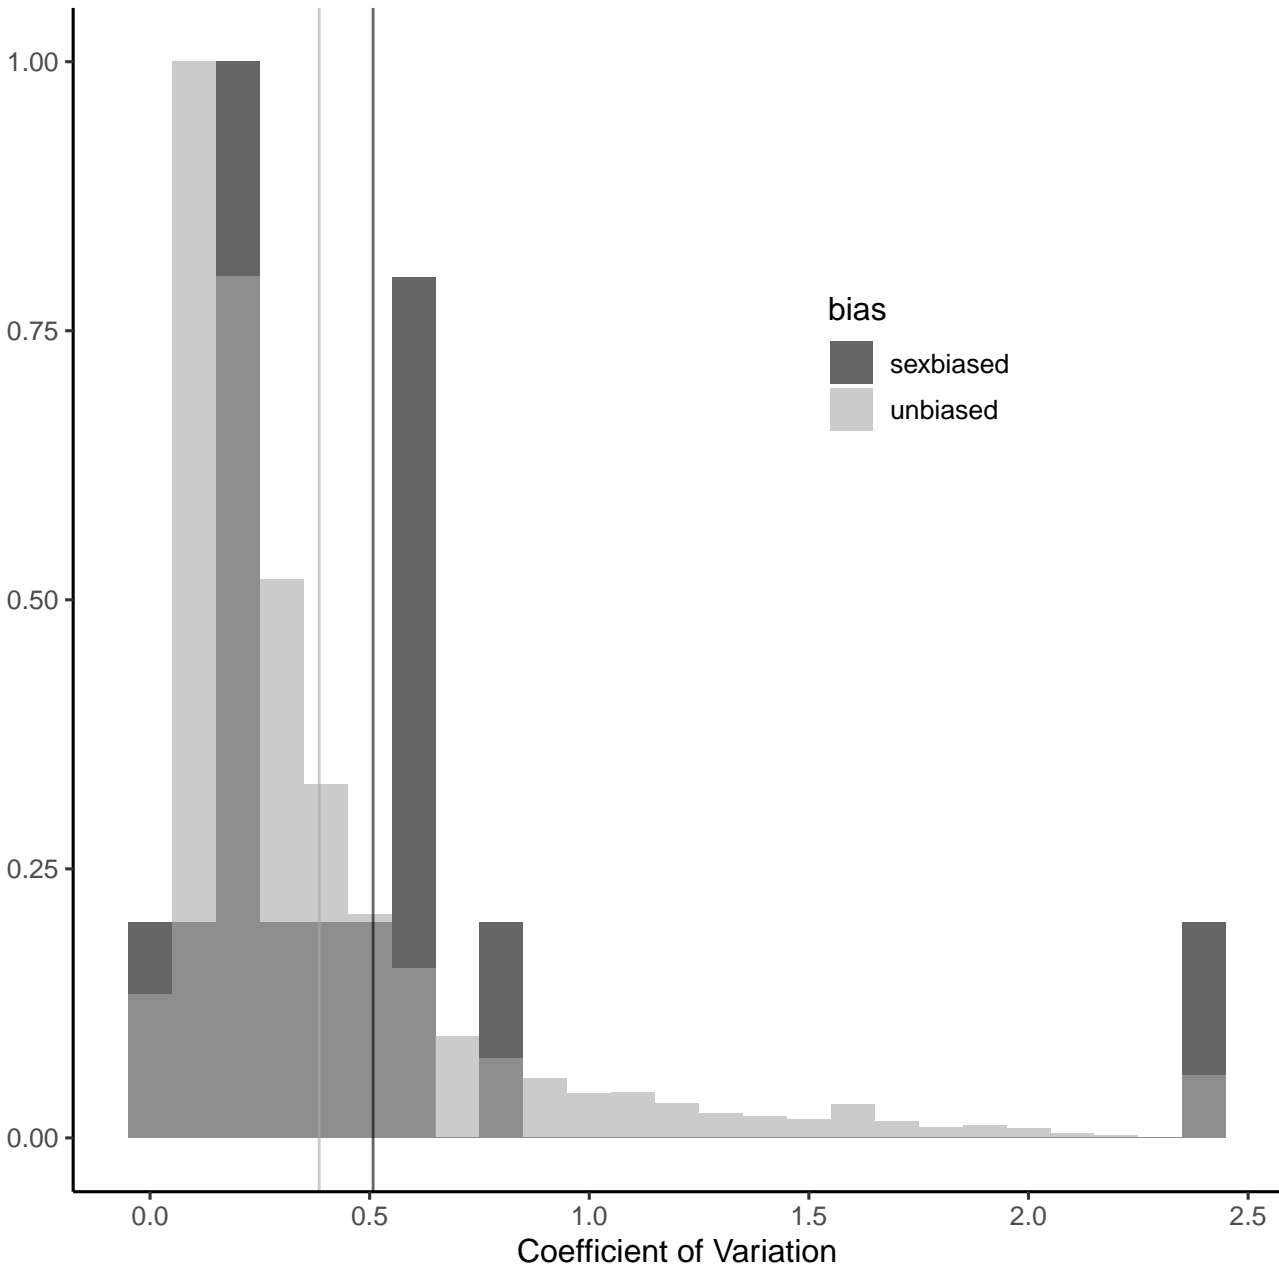

olens.F, difference of means = 0.234, perm. p = 0.003

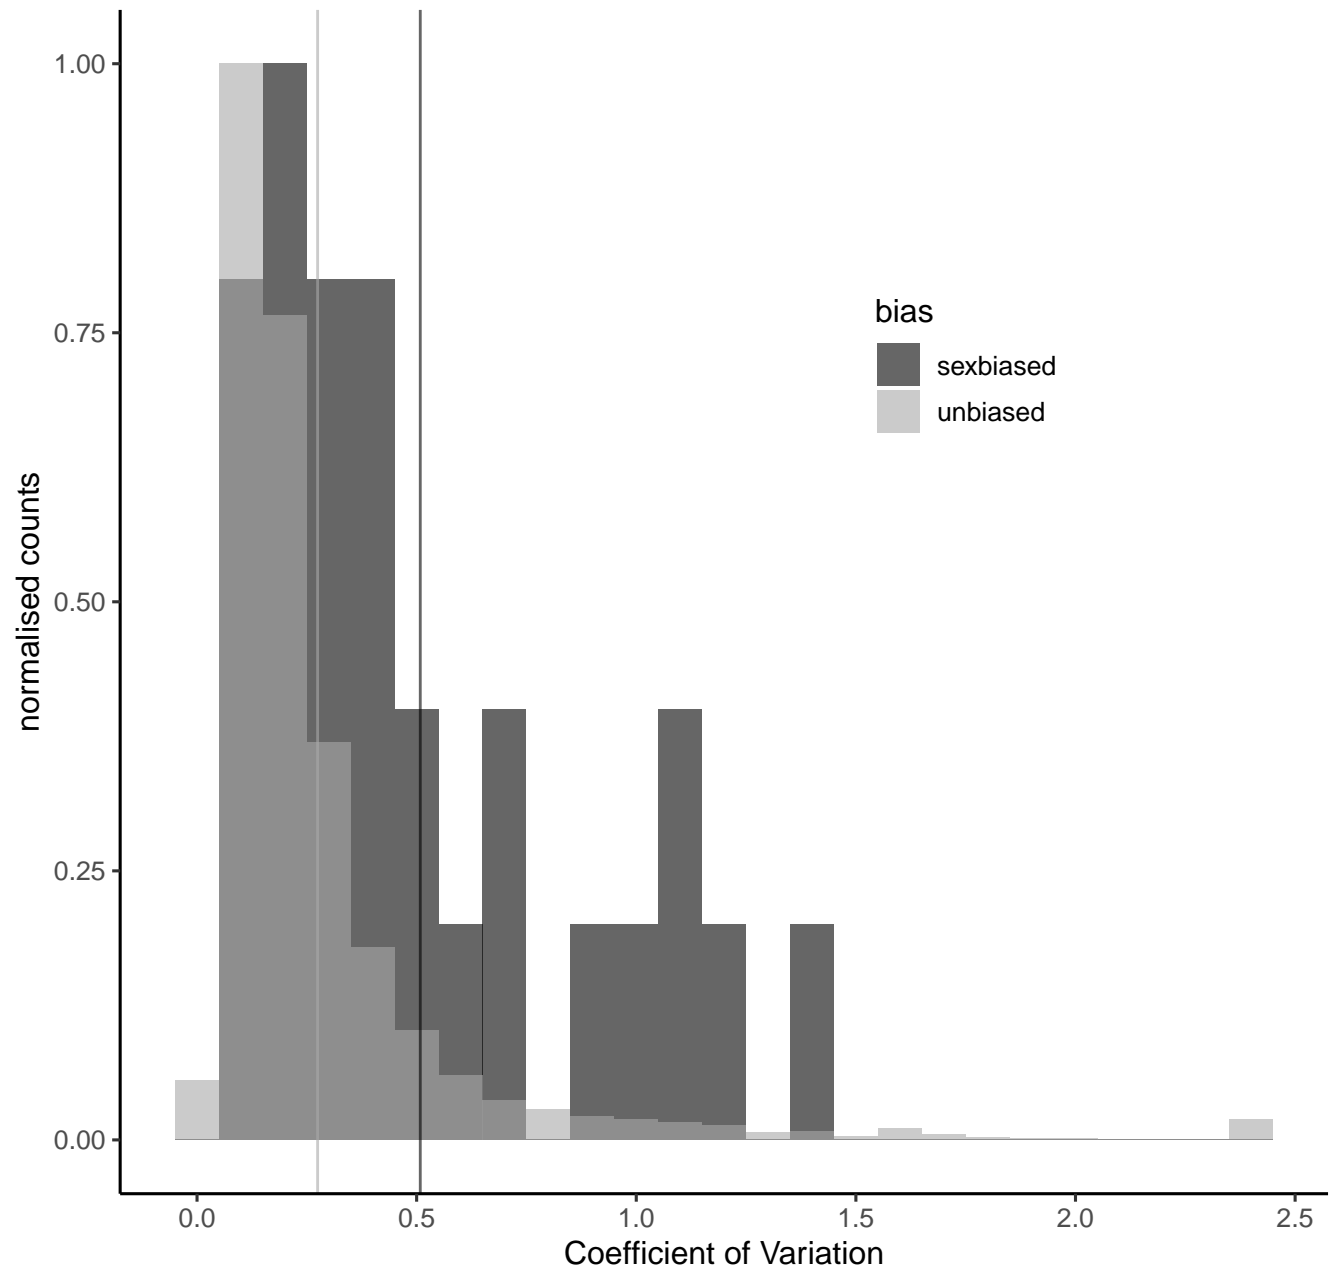

olens.M, difference of means = 0.216, perm. p = 0.002

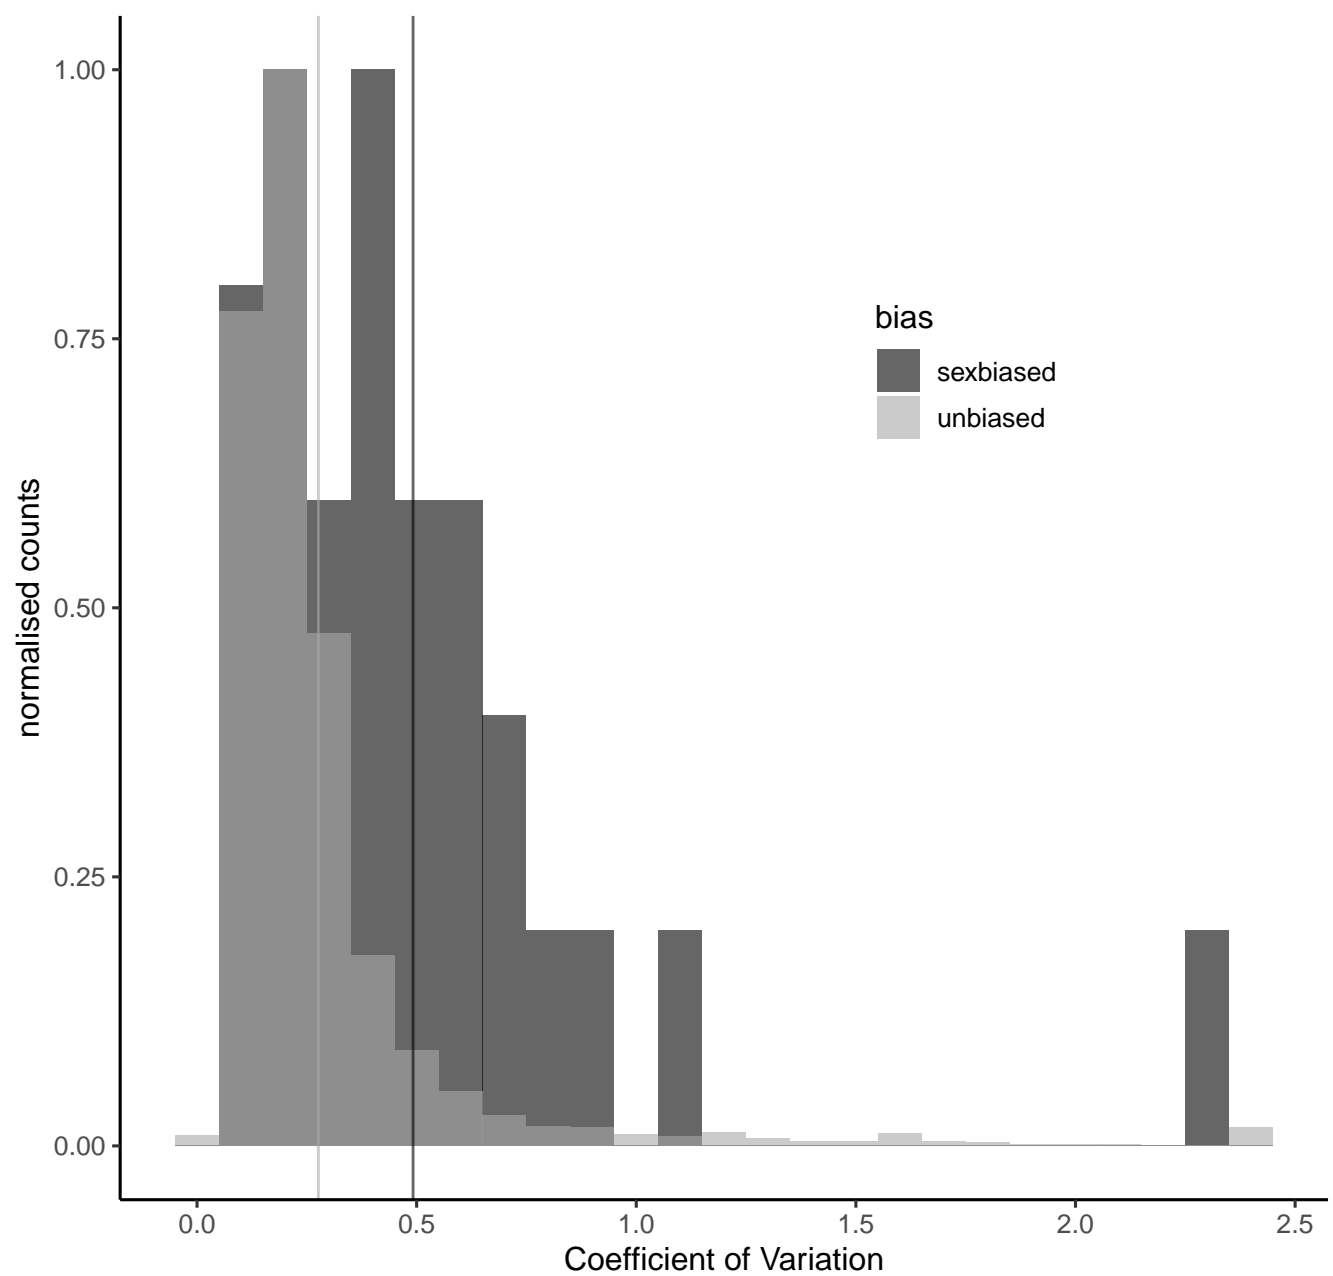

platyspermum.F, difference of means =  $-0.277$ , perm. p = 0

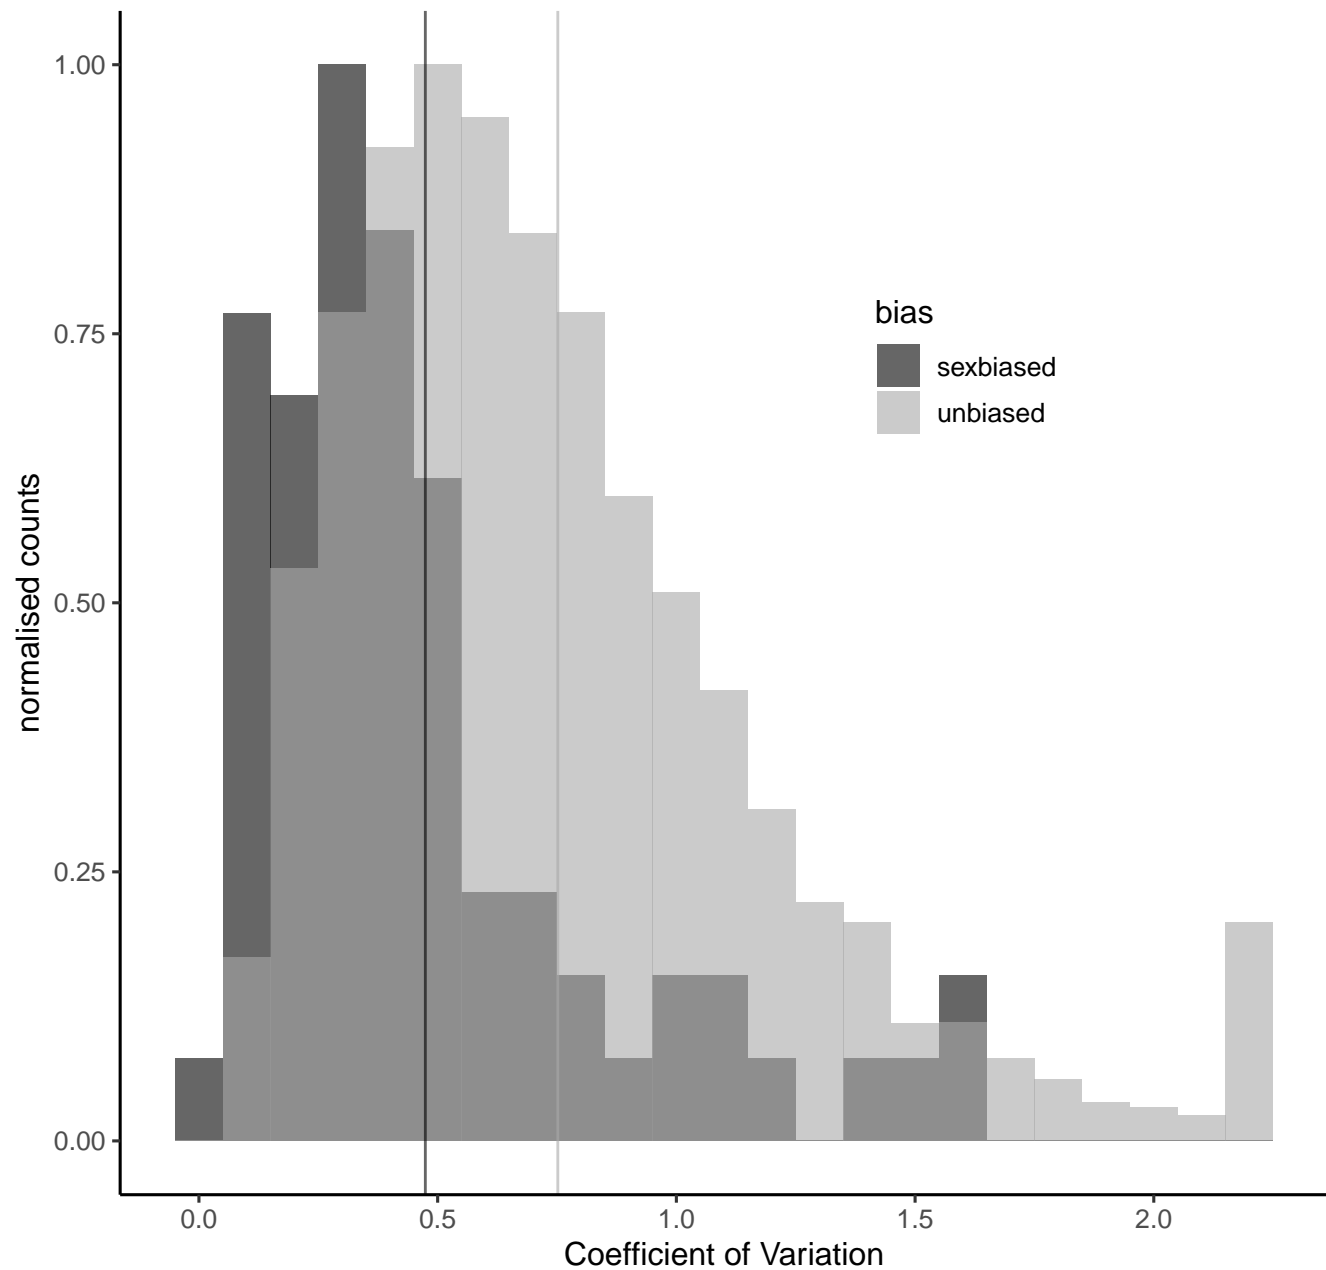

platyspermum.M, difference of means =  $-0.007$ , perm.  $p = 0.891$

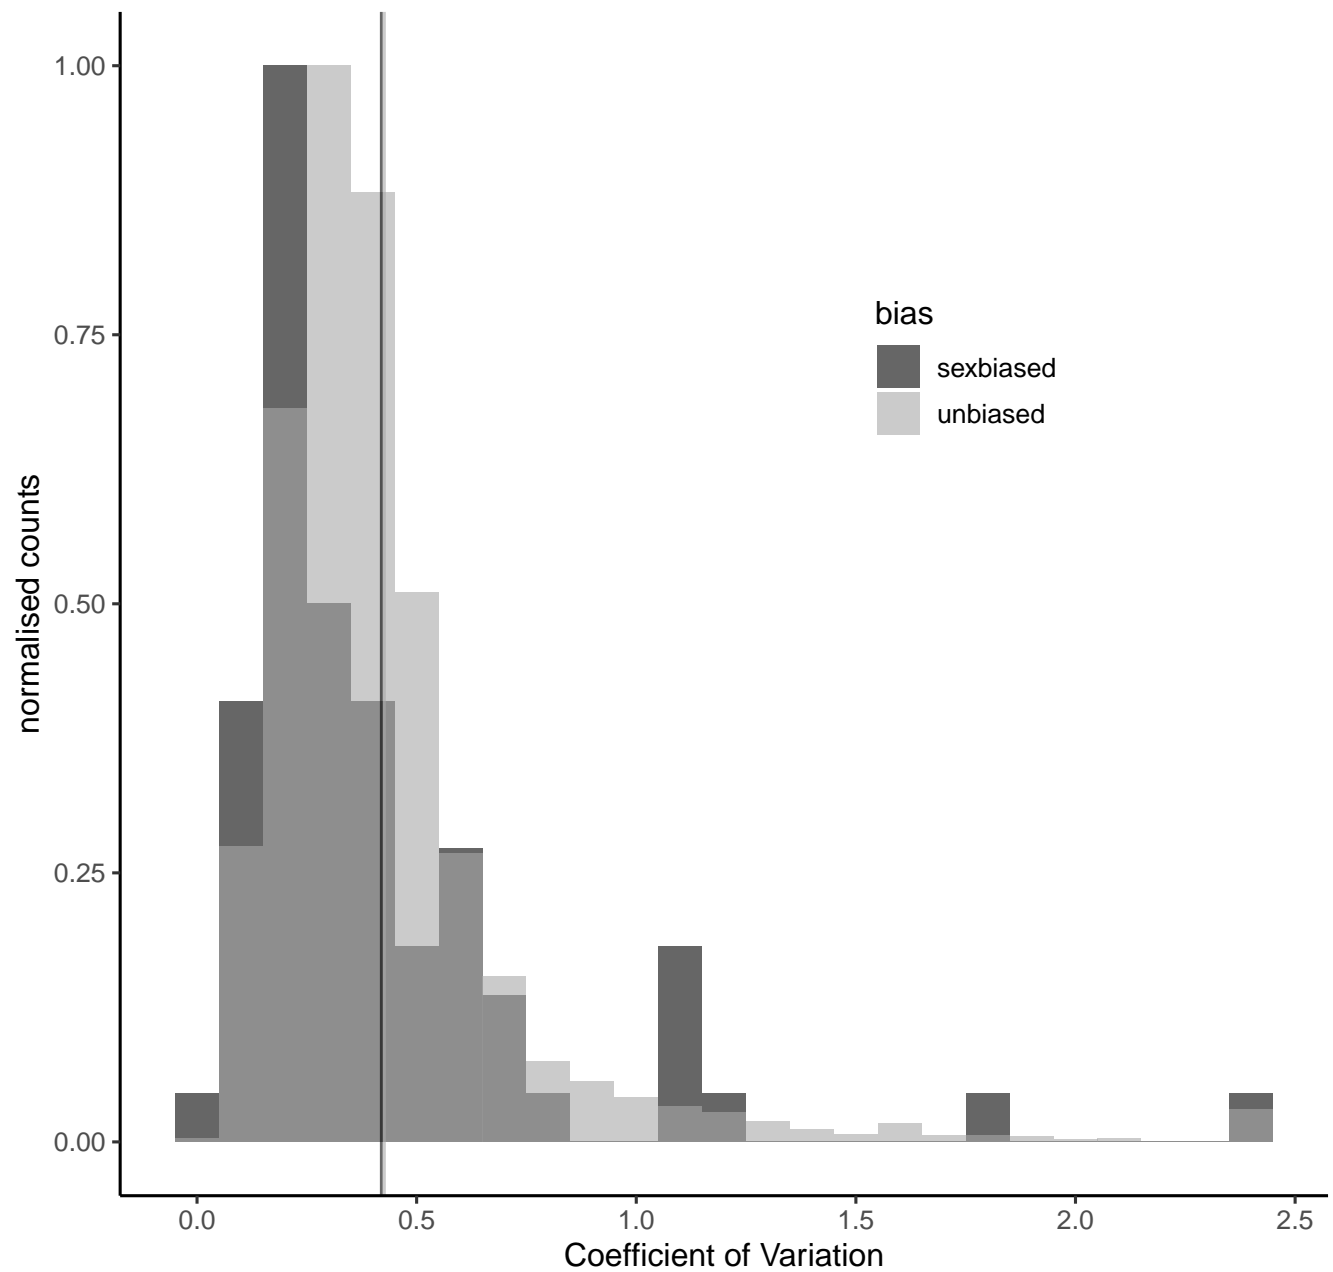

rubrum.F, difference of means = 0.061, perm. p = 0.177

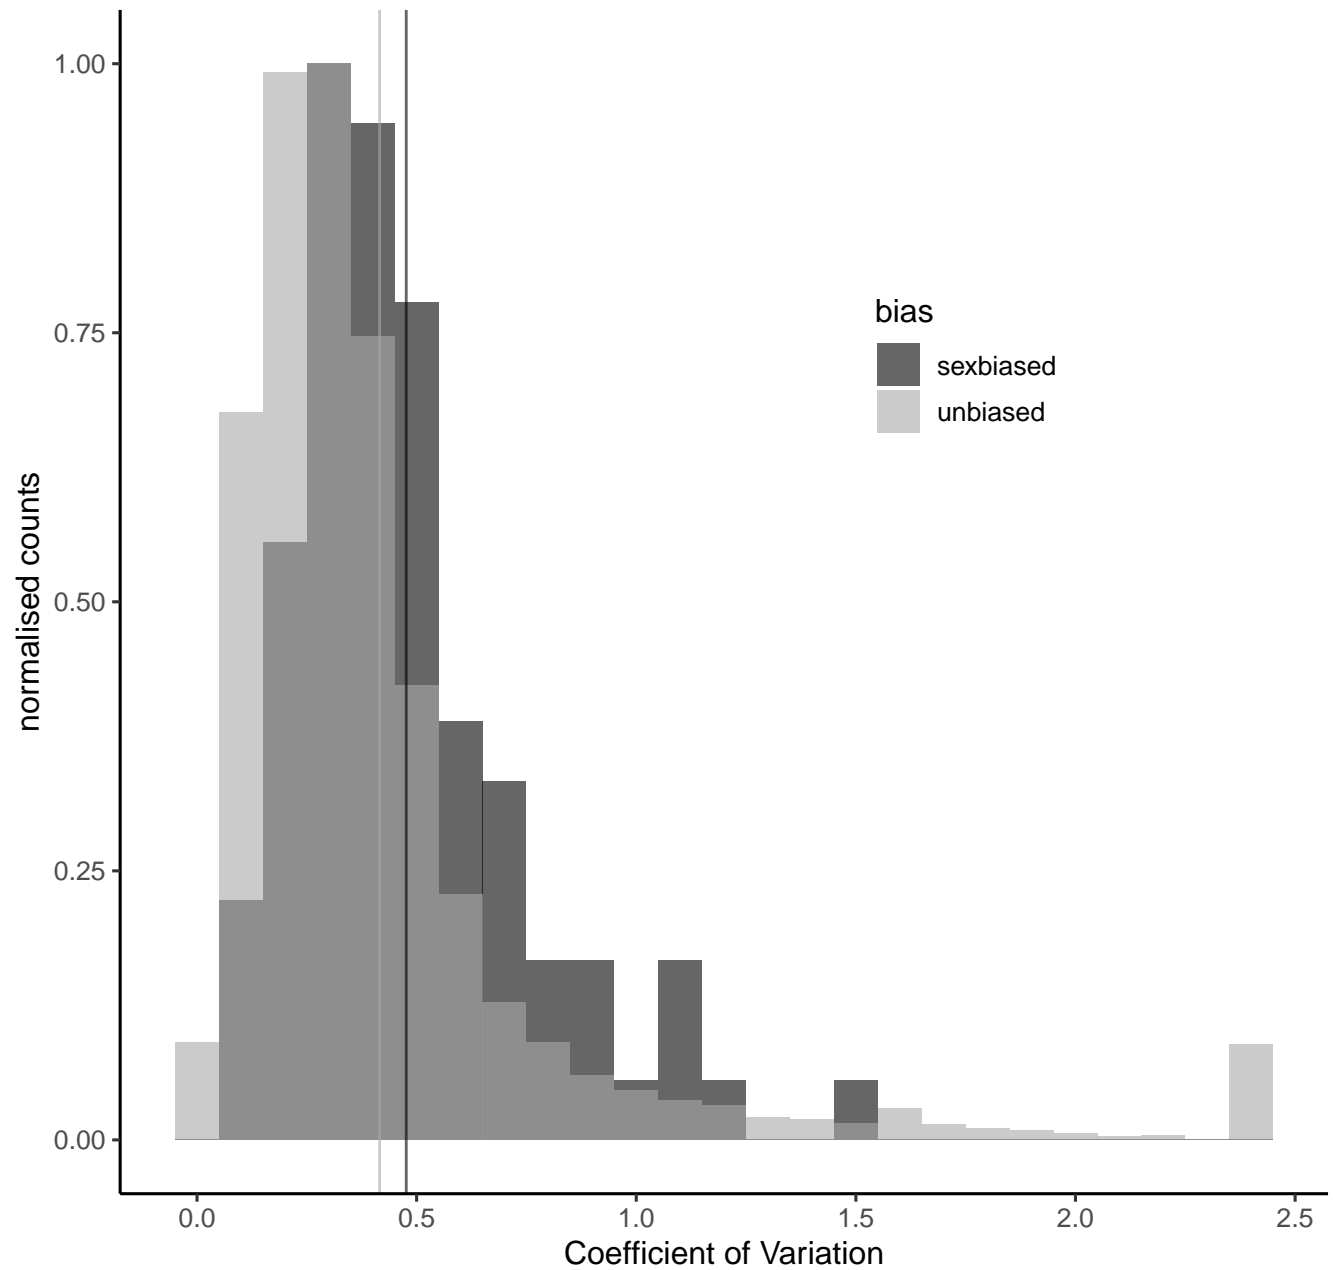

rubrum.M, difference of means = 0.136, perm. p = 0.001

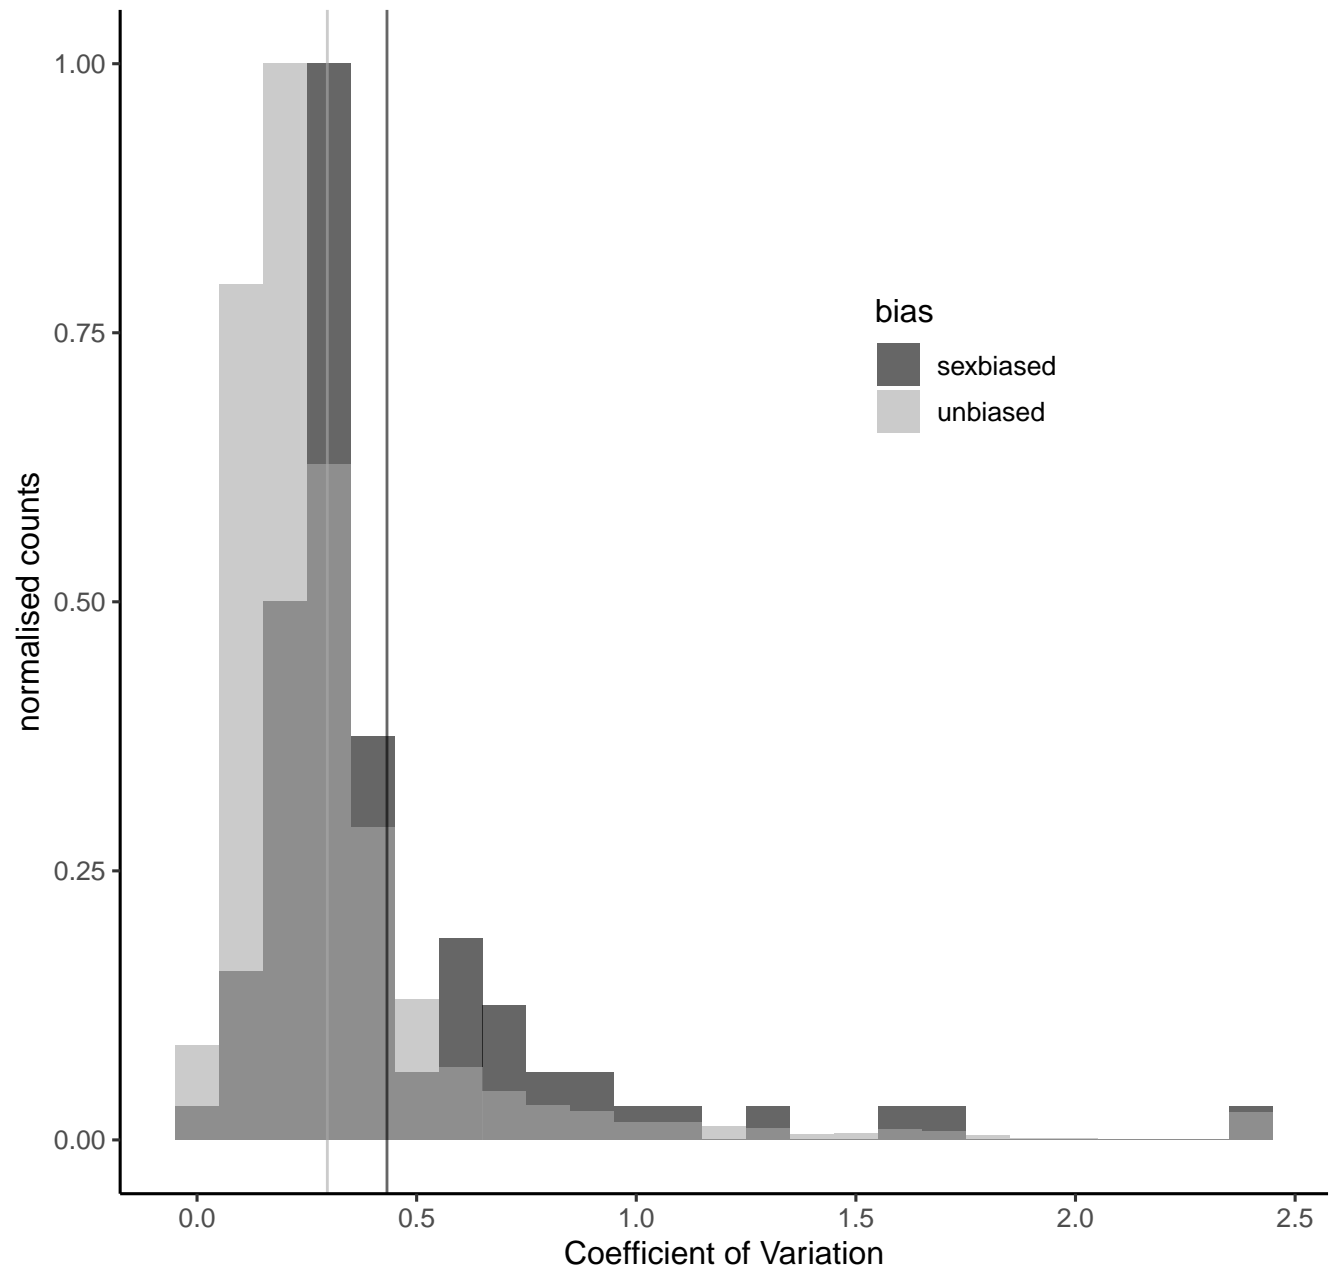



spissifolium.F, difference of means = 0.057, perm. p = 0.135

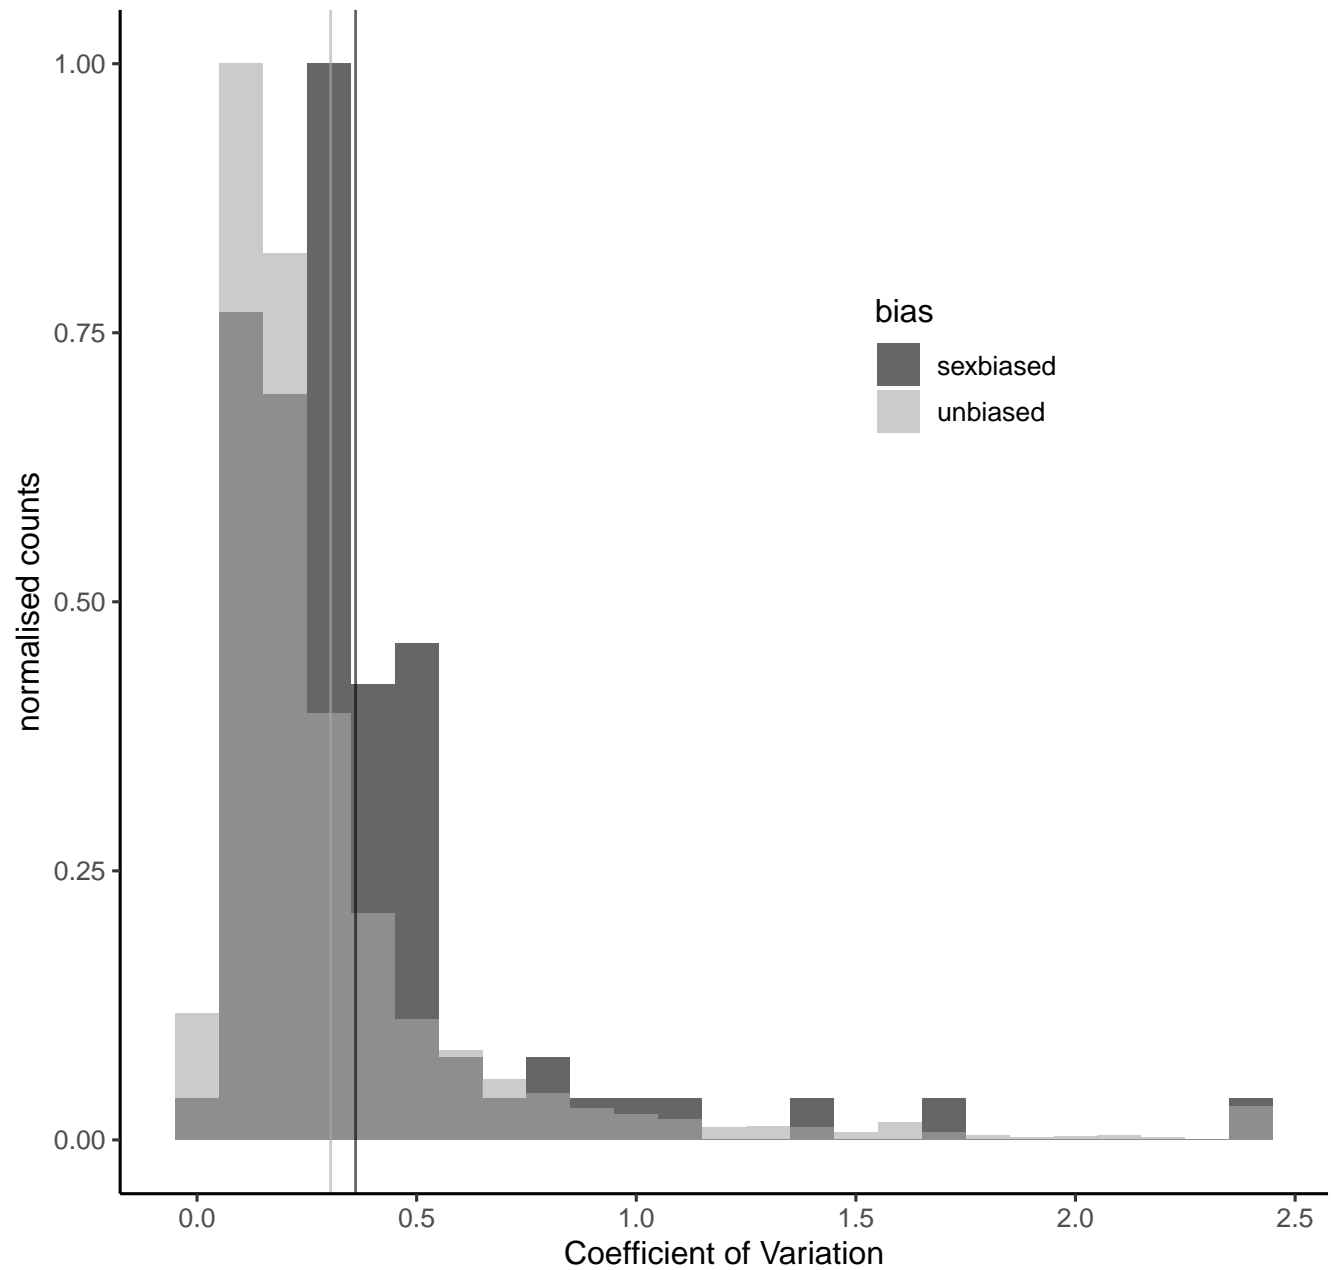

spissifolium.M, difference of means = 0.082, perm. p = 0.023

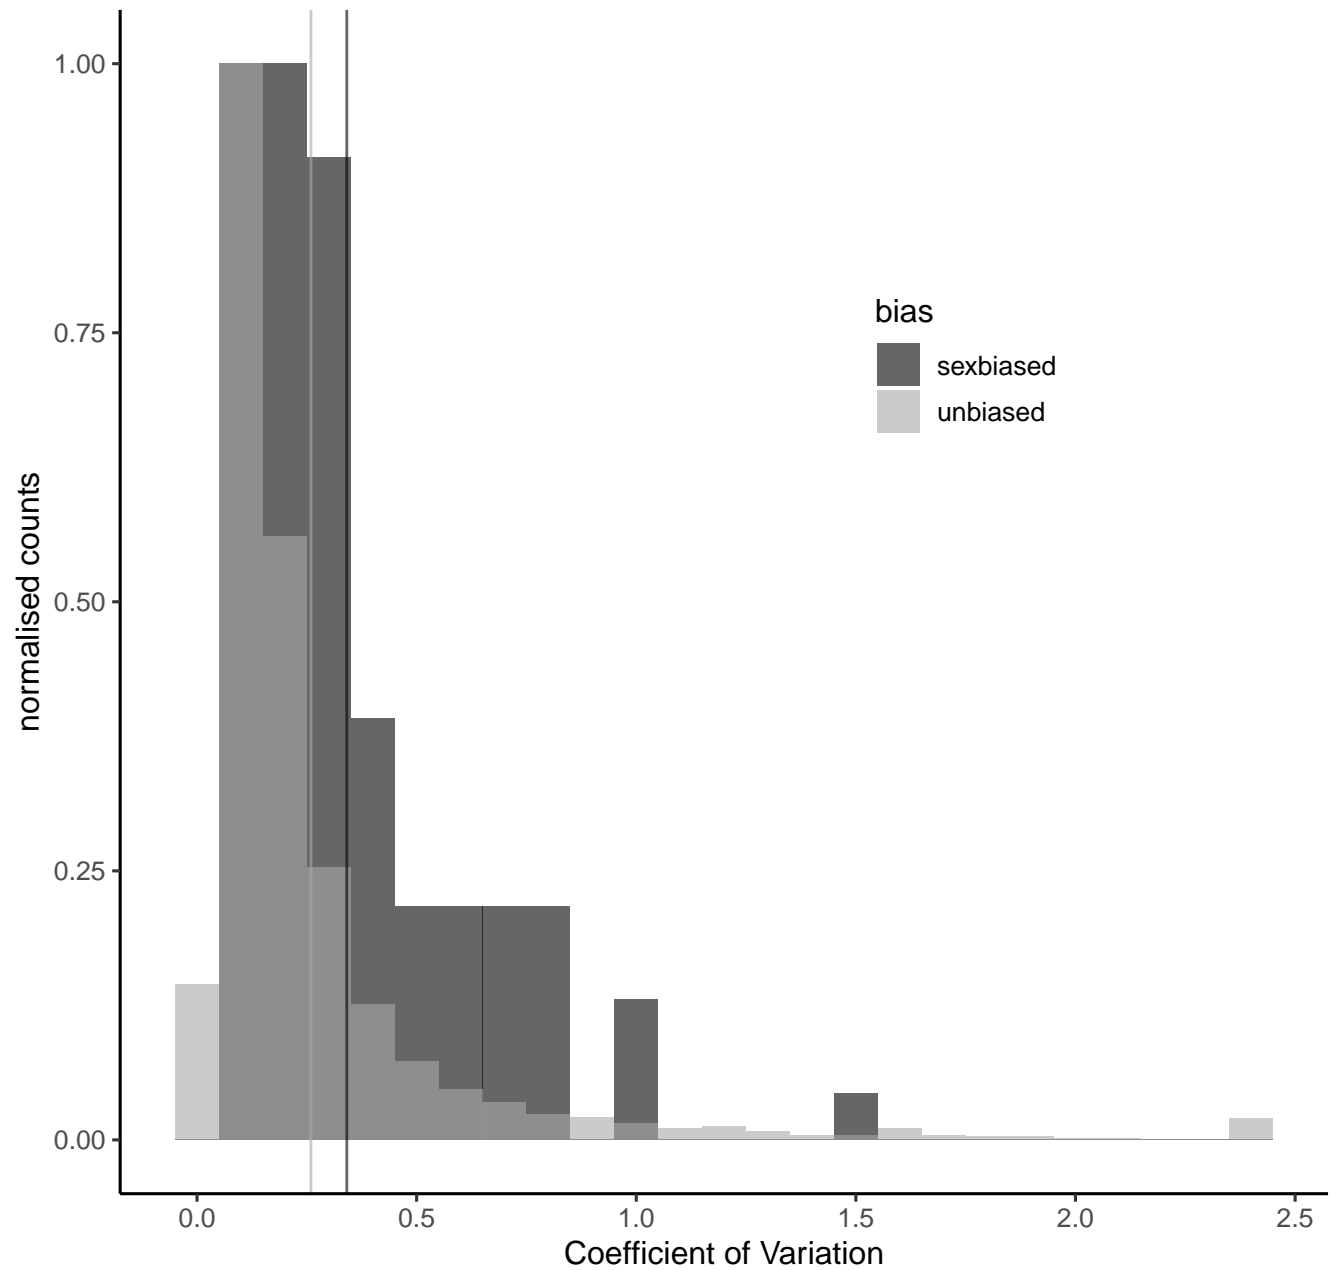

xanthoconus.F, difference of means = 0.022, perm. p = 0.502

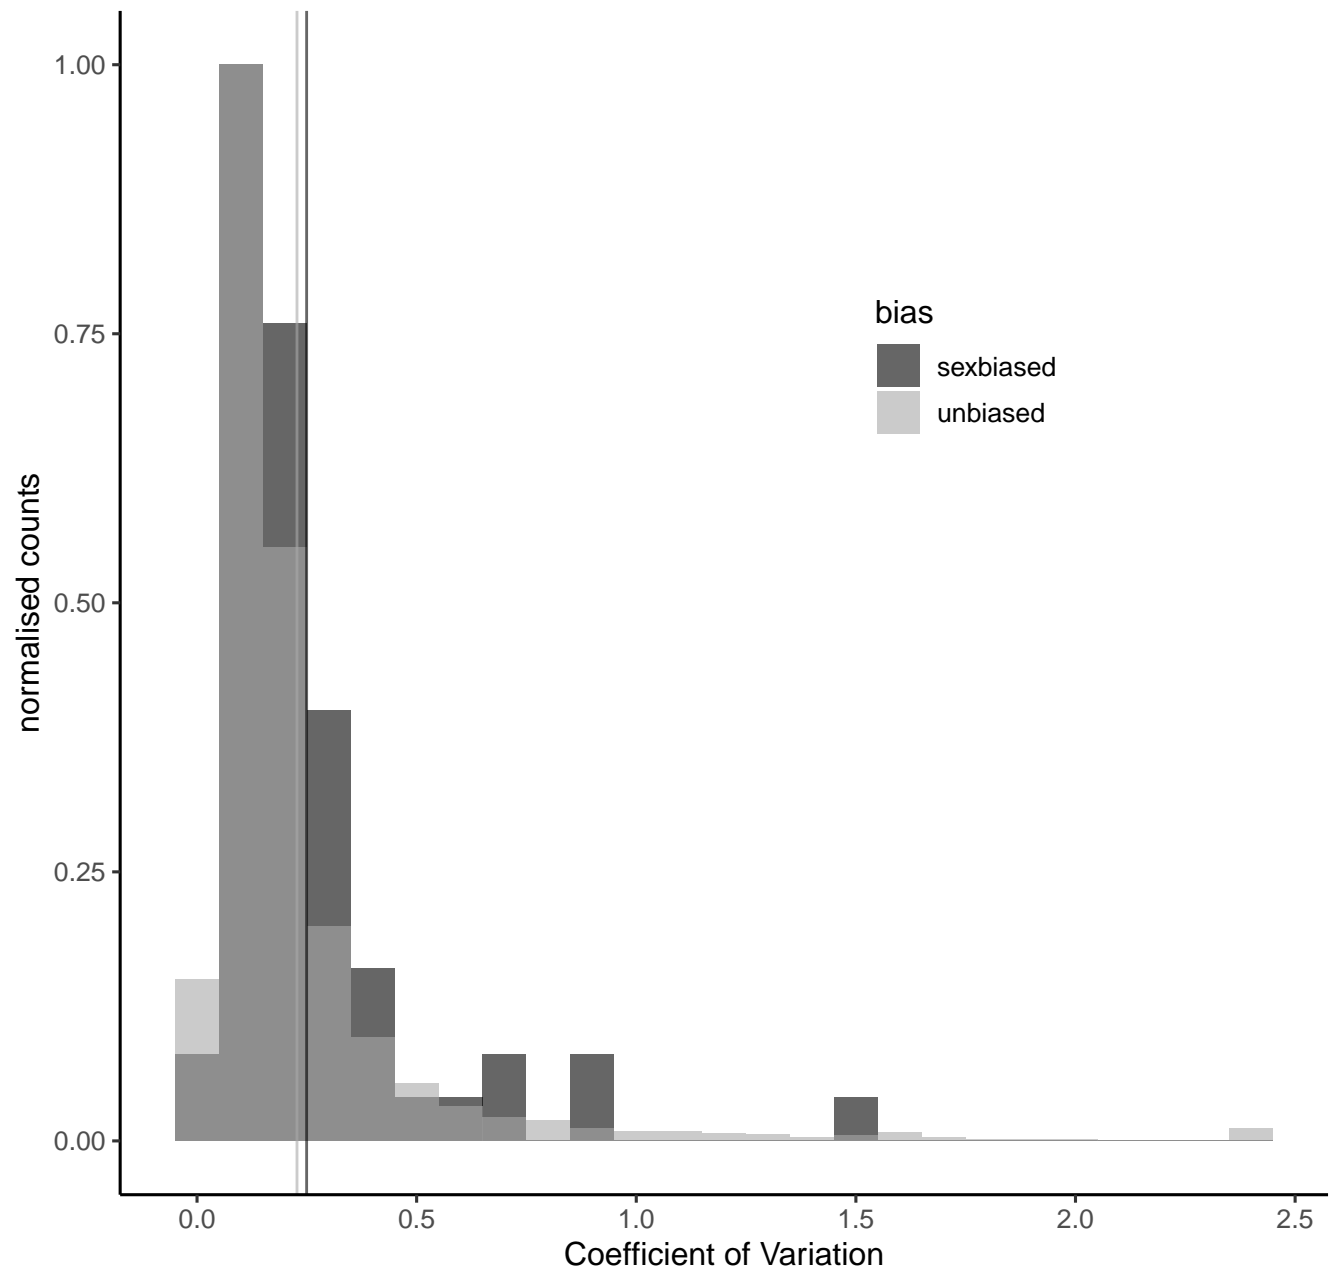

xanthoconus.M, difference of means = 0.008, perm. p = 0.772

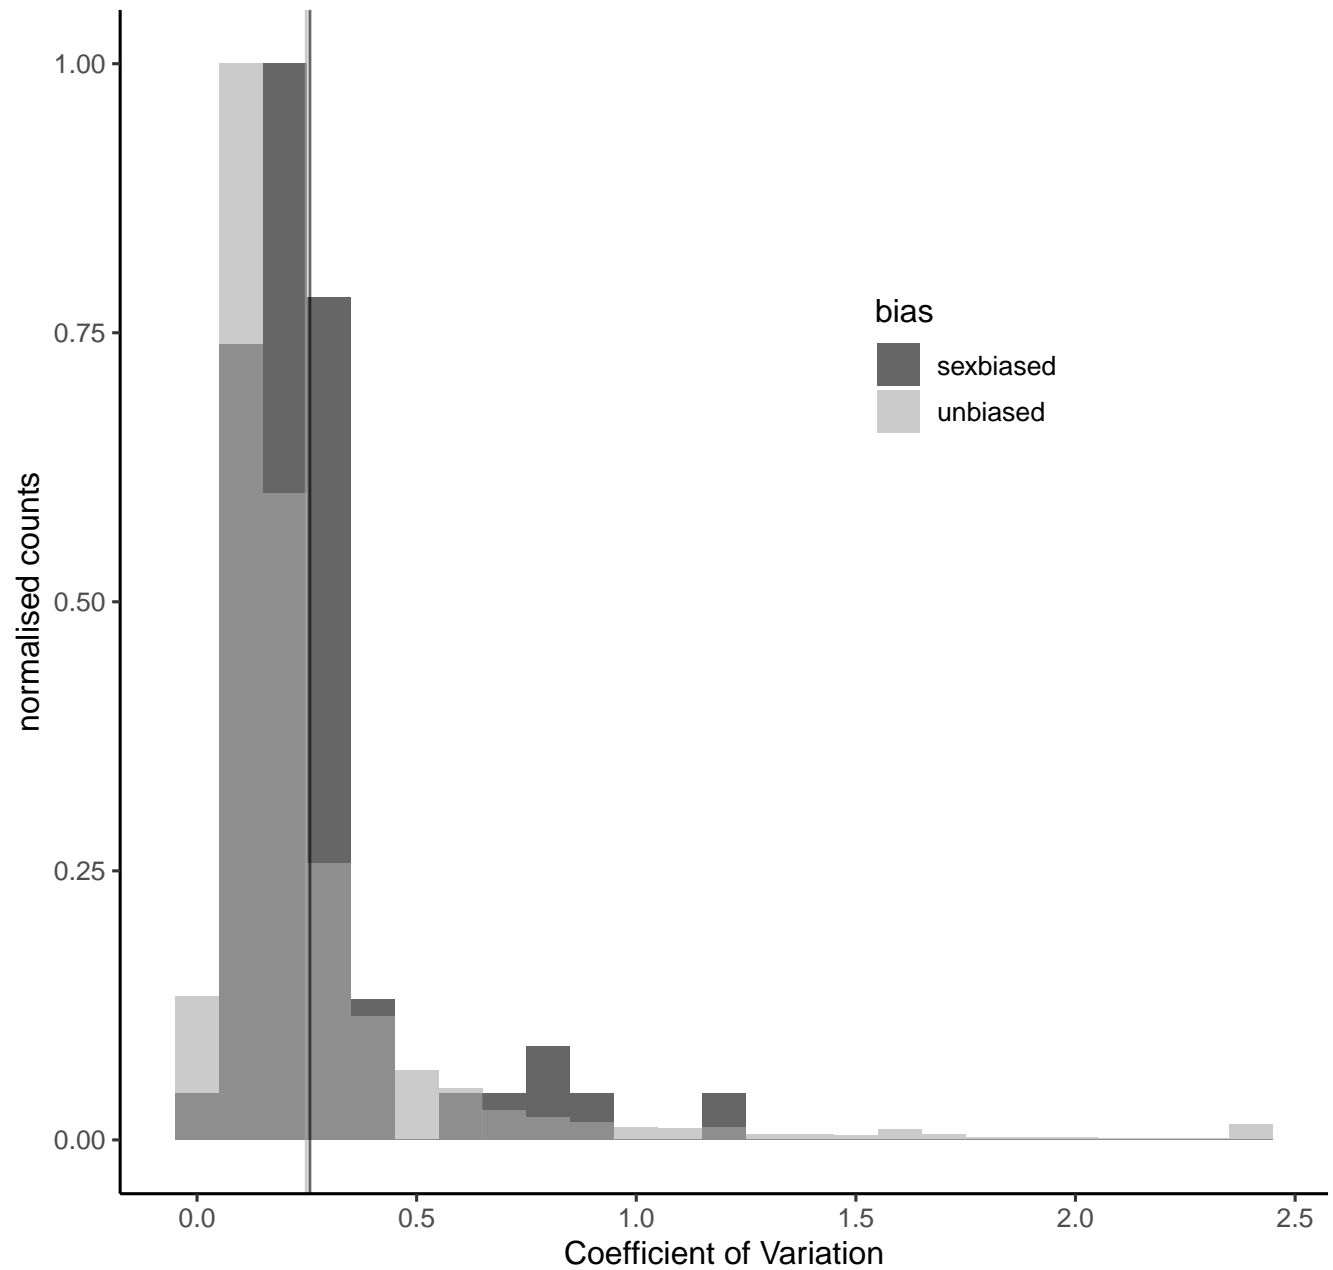

Supplement: supp2 [file elife-67485-supp2-v2.pdf]
