# Supplementary material for: High rates of evolution preceded shifts to sex-biased gene expression in Leucadendron, the most sexually dimorphic angiosperms
Source: eLife journal article supplement (doi:10.7554/elife.67485), 2021-11-02

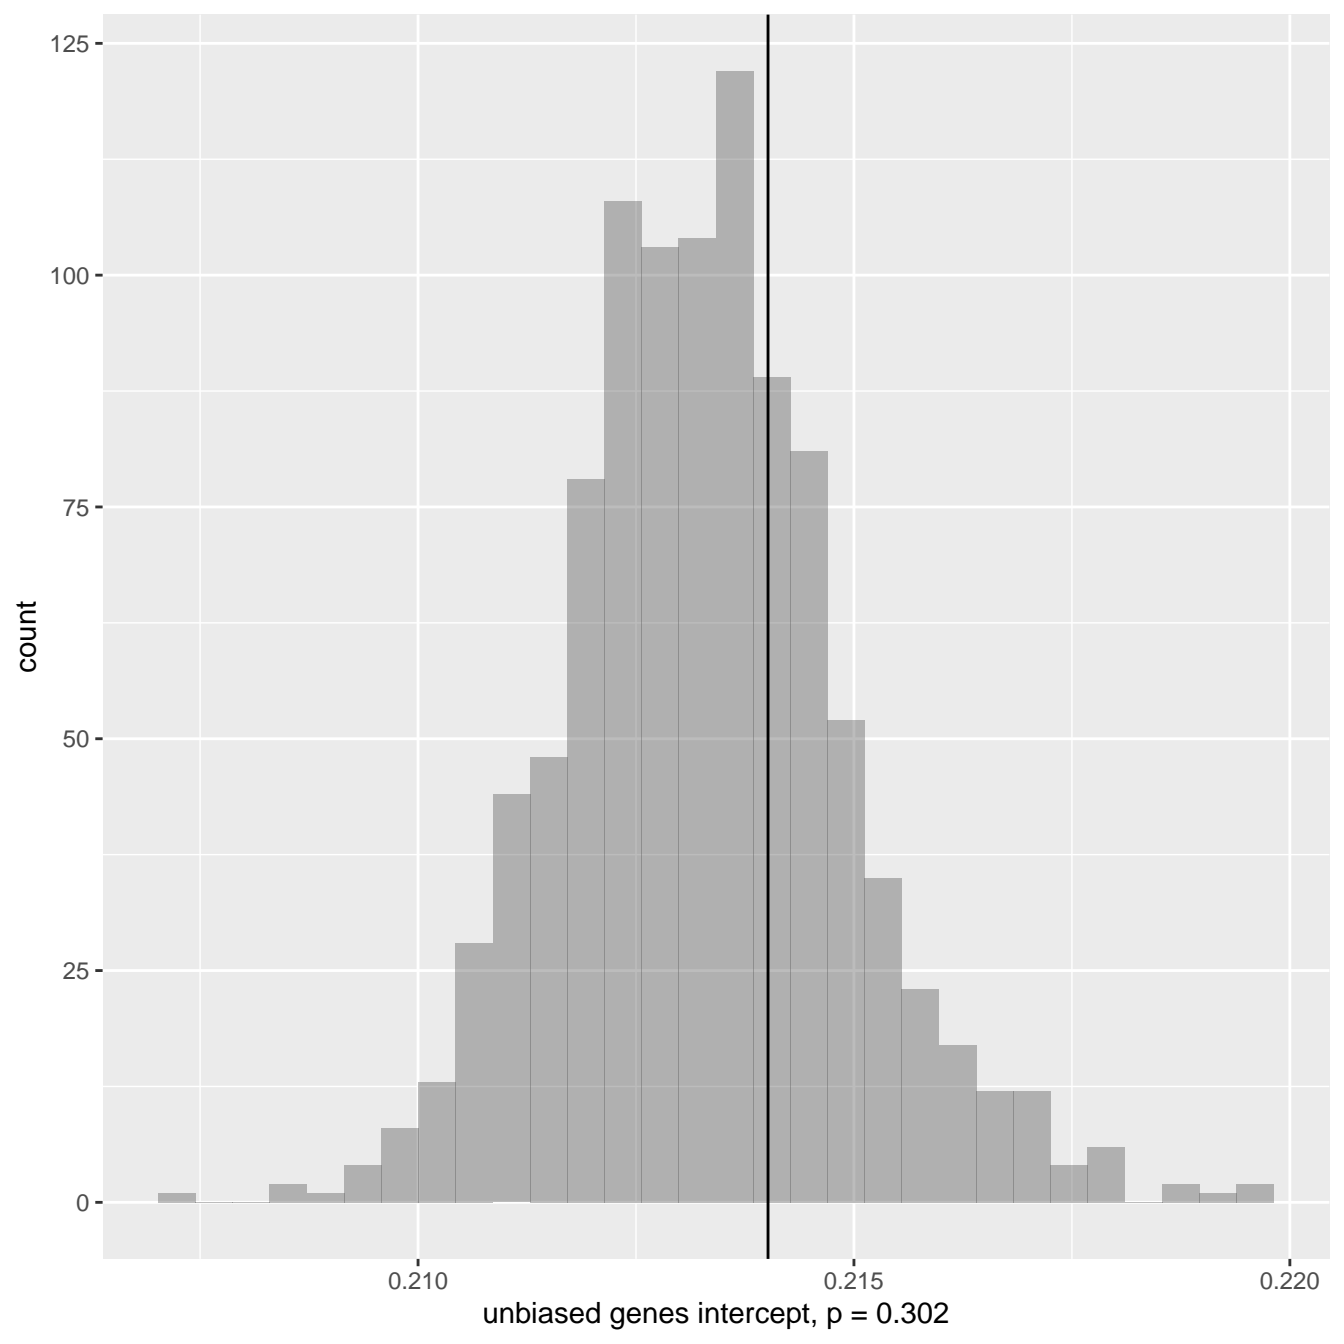

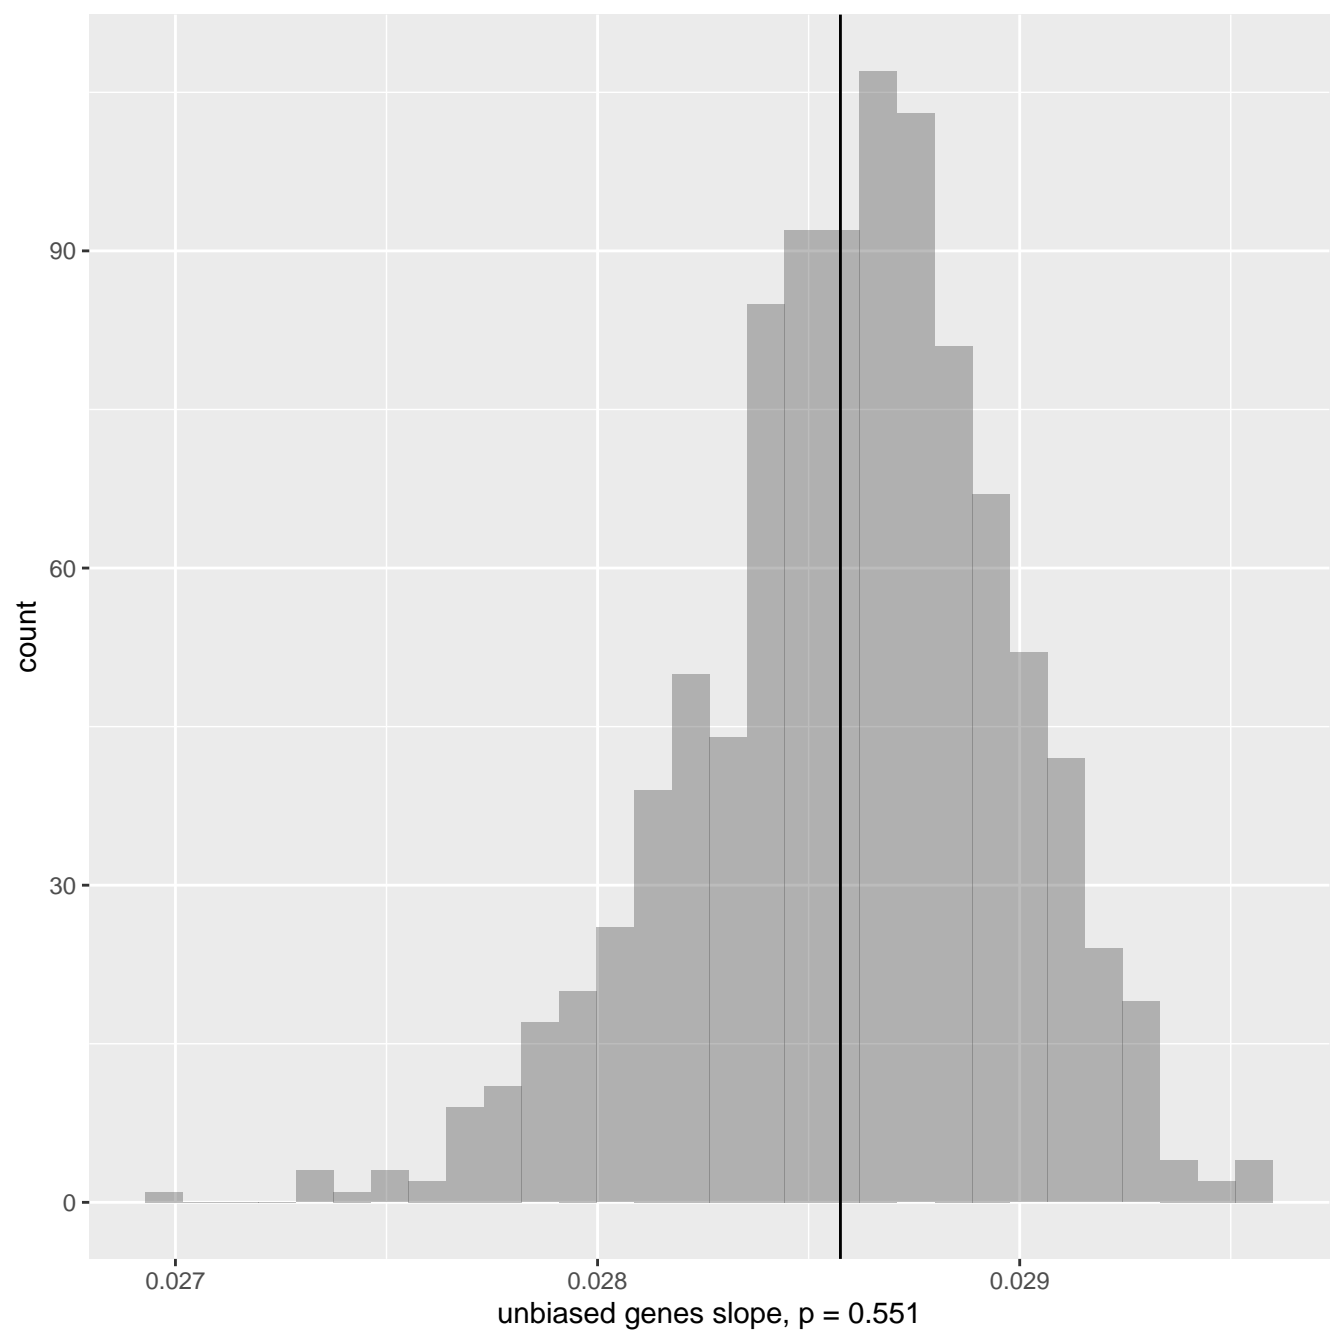

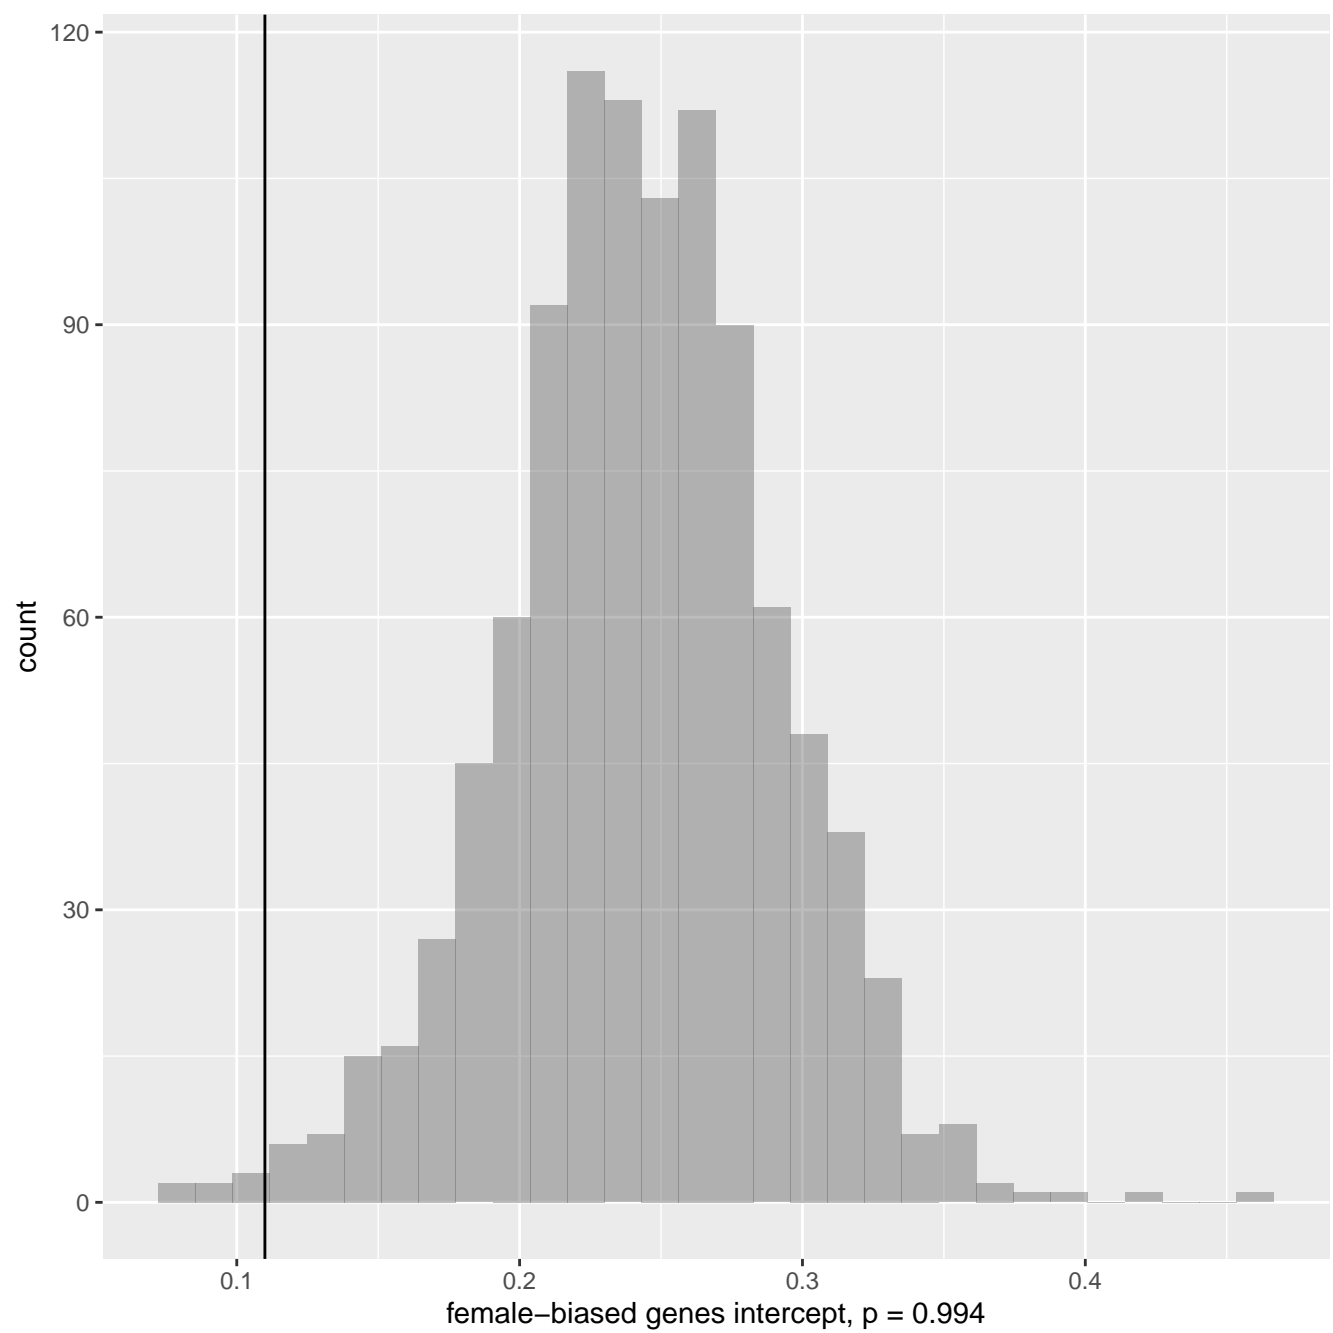

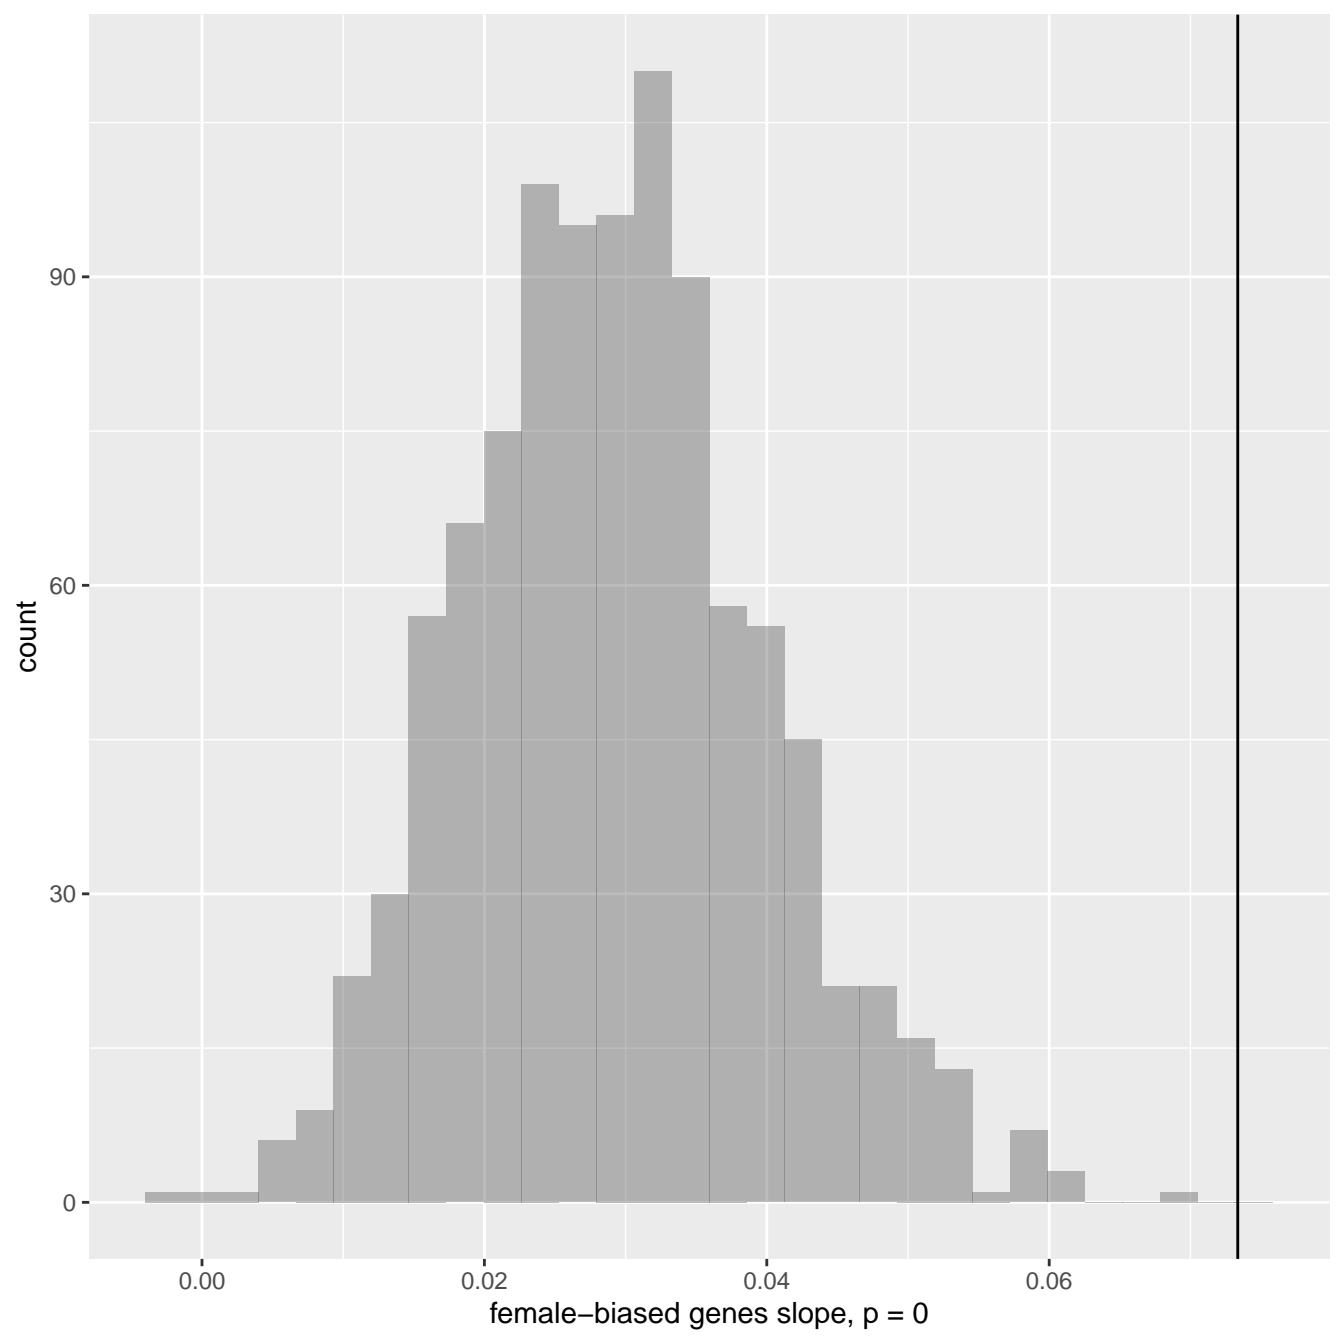

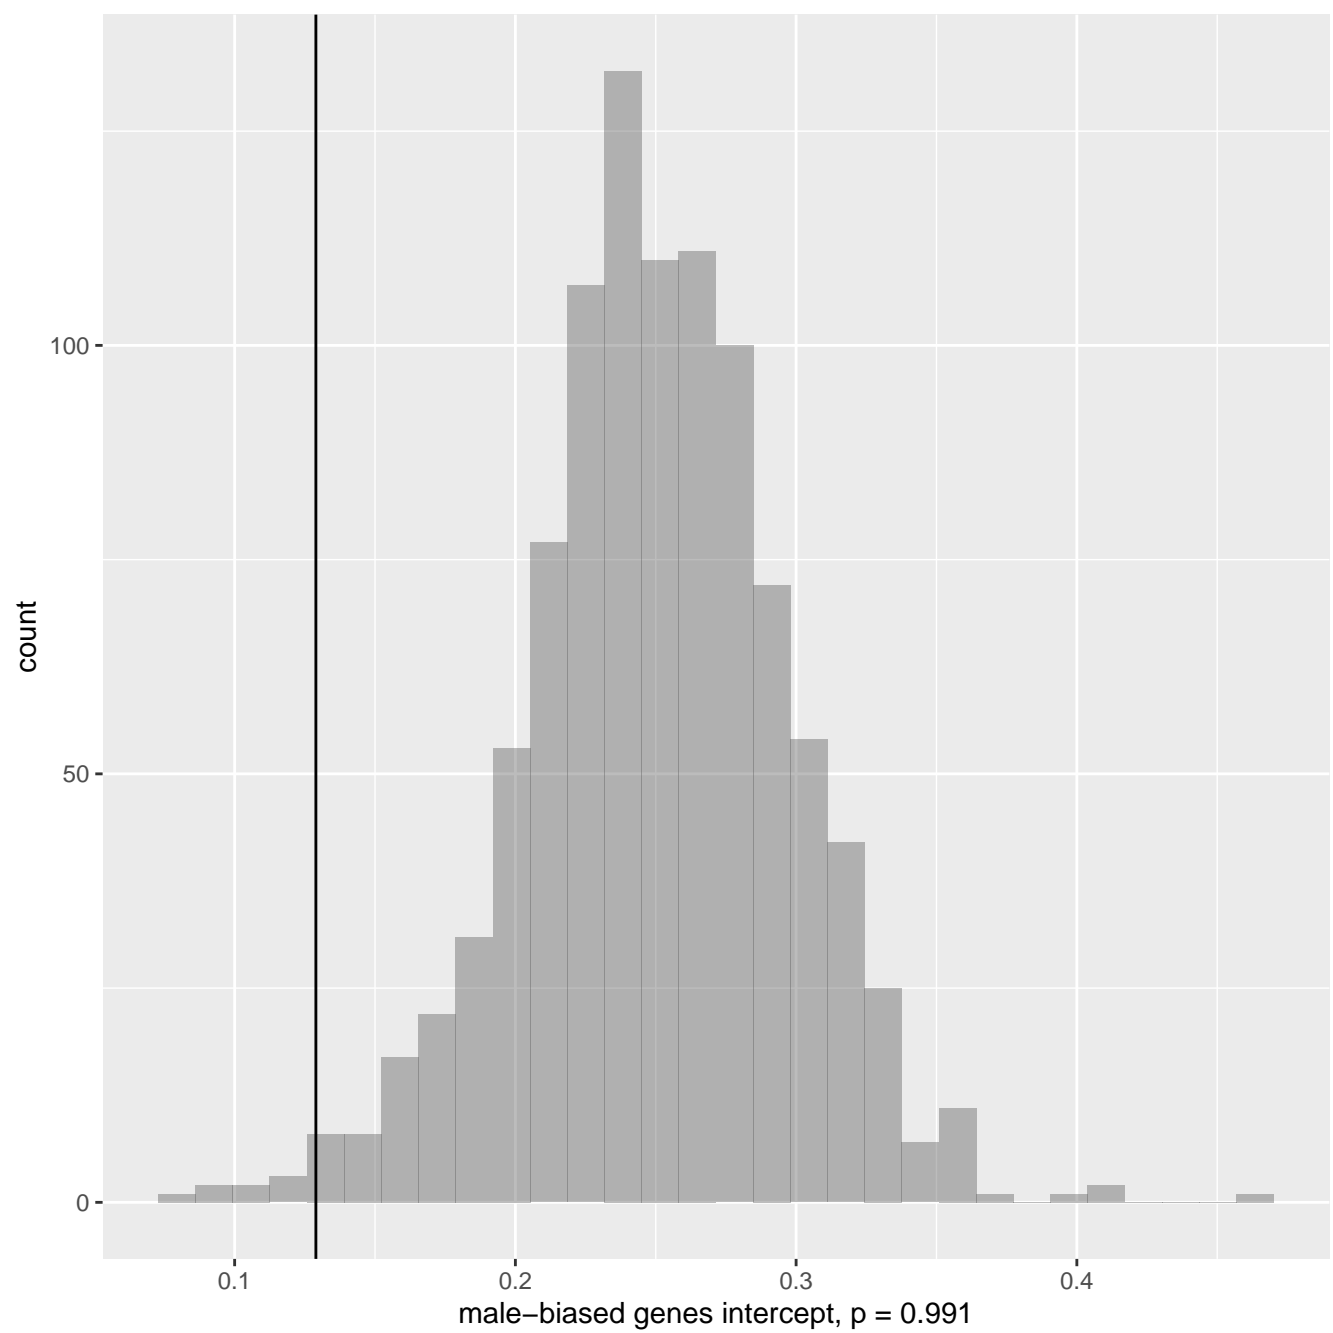

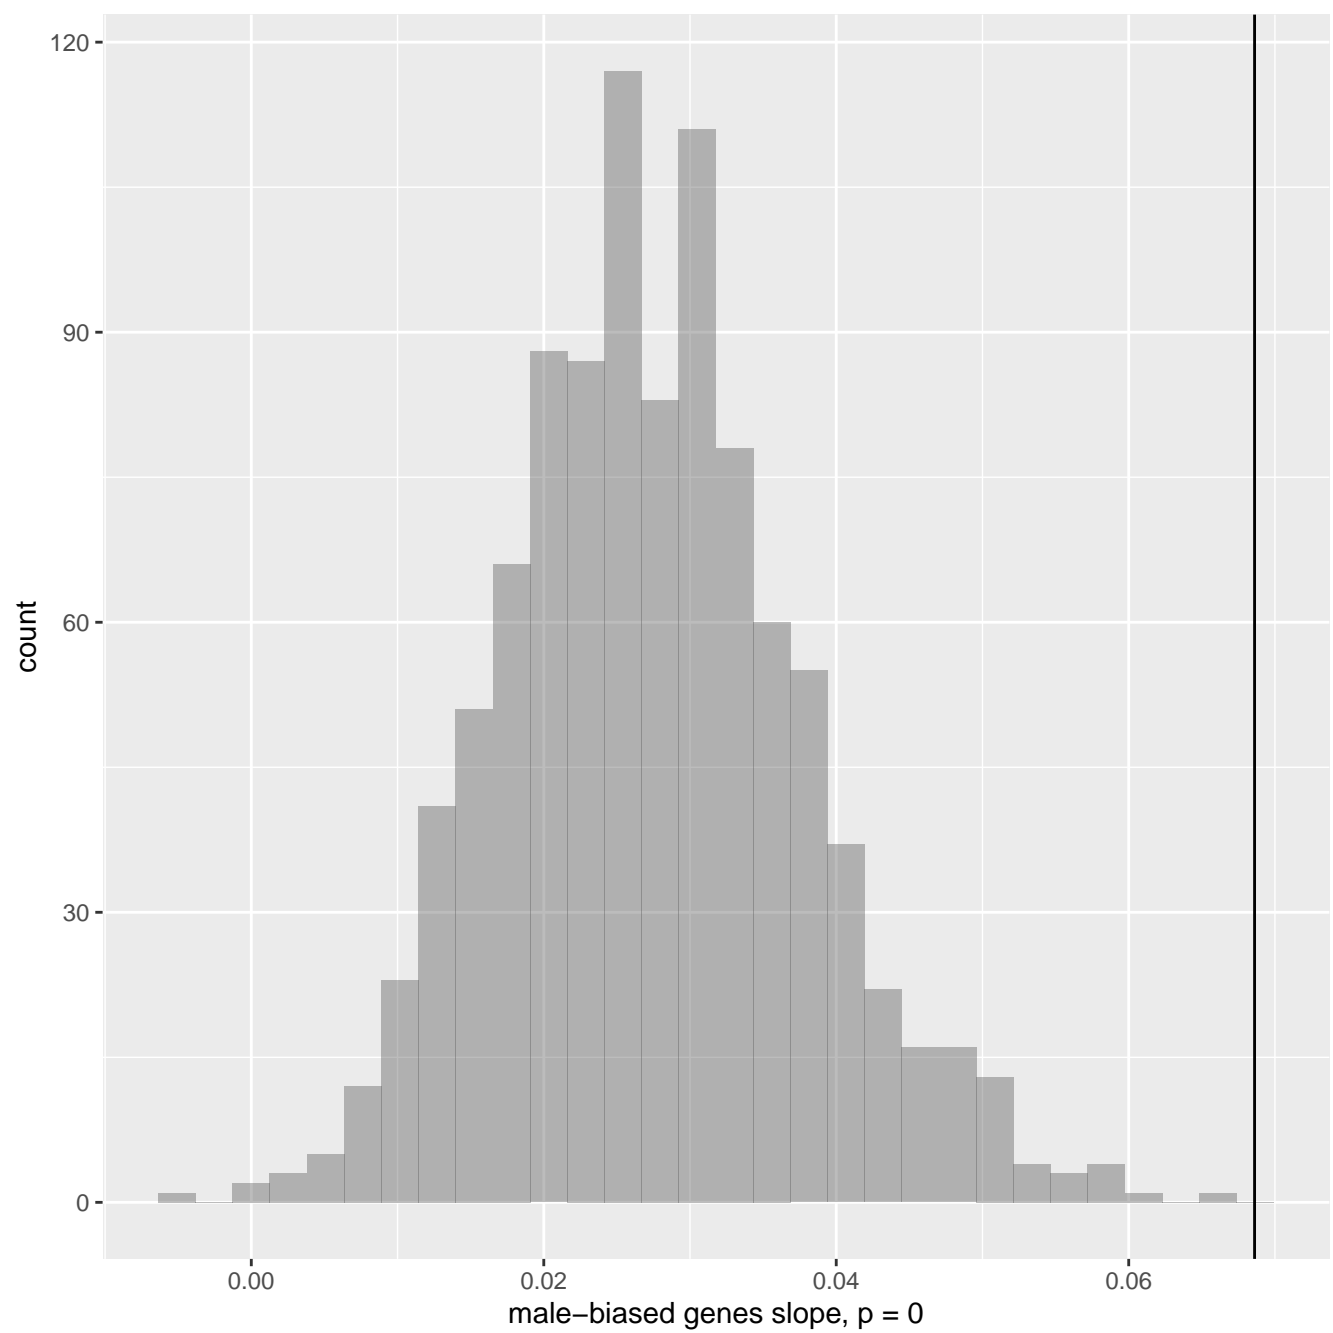

Supplement: supp [file elife_poa_e67485_Supplementary_file_3.pdf › elife_poa_e67485_Supplementary_file_3.pdf]
