# Supplementary material for: High rates of evolution preceded shifts to sex-biased gene expression in Leucadendron, the most sexually dimorphic angiosperms
Source: eLife. 2021 Nov 2;10:e67485. doi: 10.7554/eLife.67485 (PMC8635981; doi:10.7554/eLife.67485)
Supplement: Supplementary file 1. [file elife-67485-supp1.xlsx]

## Sheet: Table_S1
				Table S1. Descriptive statistics of denovo assembled transcriptome sequences.
species	N_individuals_used_in_assembly	denovo_contigs	percent_GC	contig_N50	median_contig_length	average_contig_length	total_assembled_bases	Viridiplantae_contigs_BLAST_nt	proportion_Viridiplantae
Leucadendron brunioides	6	240989	42.13	1484	488	865.81	208651711	70652	0.29
Leucadendron dubium	6	570280	46.09	970	347	624.06	355889860	75004	0.13
Leucadendron ericifolium	6	337464	41.57	1908	590	1066.66	359959595	92840	0.28
Leucadendron linifolium	6	218469	43.77	1197	357	683.49	149322210	57059	0.26
Leucadendron muirii	6	146808	43.09	1518	430	832.27	122184432	49549	0.34
Leucadendron olens	6	393690	44.21	1392	442	810.79	319201521	59270	0.15
Leucadendron platyspermum	6	272492	42.83	1525	435	836.61	227969815	72297	0.27
Leucadendron rubrum	6	213313	43.5	1501	419	818.17	174525314	57722	0.27
Leucadendron spissifolium	6	246171	44.67	1180	353	679.04	167160630	55292	0.22
Leucadendron xanthoconus	6	203173	43.74	1406	430	799.99	162536797	54288	0.27
Leucospermum reflexum	1	73307	43.37	1807	752	1104.71	80982628	34901	0.48

## Sheet: Table_S2
Table S2. List of all 650 sex-biased genes and direction of sex-bias per Leucadendron species, together with annotated AT gene identifier.
species	bias	OG	AT_gene_hit_ID	AT_hit_description	AT_hit_GOterms
brunioides	male-biased	OG0000182	AT4G16260	ID=AT4G16260;Name=AT4G16260;Note=Glycosyl hydrolase superfamily protein;curator_summary=Encodes a putative beta-1%2C3-endoglucanase that interacts with the 30C02 cyst nematode effector. May play a role in host defense.;computational_description=Glycosyl hydrolase superfamily protein%3B FUNCTIONS IN: cation binding%2C hydrolase activity%2C hydrolyzing O-glycosyl compounds%2C catalytic activity%3B …	GO:0005975,GO:0099503,GO:0005618,GO:0009817,GO:0005739,GO:0005774,GO:0046658,GO:0005576,GO:0002215,GO:0042973
brunioides	male-biased	OG0000329	AT1G17840	ID=AT1G17840;Name=AT1G17840;Note=white-brown complex-like protein;curator_summary=Encodes a plasma membrane-localized ATP-binding cassette transporter%2C that is required for cutin transport to the extracellular matrix.;symbol=ABCG11;Alias=ATWBC11,ARABIDOPSIS THALIANA WHITE-BROWN COMPLEX HOMOLOG PROTEIN 11,AtABCG11,COF1,CUTICULAR DEFECT AND ORGAN FUSION 1,DSO,DESPERADO,WBC11,white-brown complex h…	GO:0009897,GO:0042626,GO:0016021,GO:0009737,GO:0016887,GO:0015908,GO:0010588,GO:0015245,GO:0009611,GO:0055085,GO:0080051,GO:0005515,GO:0005886,GO:0009651,GO:0005634,GO:0010222,GO:0005524,GO:0042803
brunioides	male-biased	OG0000342	AT3G55770	ID=AT3G55770;Name=AT3G55770;Note=GATA type zinc finger transcription factor family protein;curator_summary=Encodes a member of the Arabidopsis LIM proteins: a family of actin bundlers with distinct expression patterns. WLIM1%2C WLIM2a%2C and WLIM2b are widely expressed%2C whereas PLIM2a%2C PLIM2b%2C and PLIM2c are predominantly expressed in pollen. Regulates actin cytoskeleton organization.;symbo…	GO:0005737,GO:0015629,GO:0051017,GO:0051015,GO:0005886,GO:0046872,GO:0003729
brunioides	male-biased	OG0000702	AT4G24130	ID=AT4G24130;Name=AT4G24130;Note=DUF538 family protein (Protein of unknown function%2C DUF538);computational_description=Protein of unknown function%2C DUF538%3B INVOLVED IN: biological_process unknown%3B LOCATED IN: nucleus%3B EXPRESSED IN: 21 plant structures%3B EXPRESSED DURING: 12 growth stages%3B CONTAINS InterPro DOMAIN/s: Protein of unknown function DUF538 (InterPro:IPR007493)%3B BEST Arab…	GO:0005737,GO:0005634,GO:0008150
brunioides	male-biased	OG0001145	AT1G13260	ID=AT1G13260;Name=AT1G13260;Note=related to ABI3/VP1 1;curator_summary=Encodes an AP2/B3 domain transcription factor which is upregulated in response to low temperature. It contains a B3 DNA binding domain. It has circadian regulation and may function as a negative growth regulator.;symbol=RAV1;Alias=AtRAV1,EDF4,ETHYLENE RESPONSE DNA BINDING FACTOR 4;full_name=related to ABI3/VP1 1;computational_…	GO:0044212,GO:0009910,GO:0009741,GO:0003700,GO:0005634,GO:0009873,GO:0048366,GO:0045892,GO:0071456,GO:0048527,GO:0003677
brunioides	male-biased	OG0001443	AT1G69490	ID=AT1G69490;Name=AT1G69490;Note=NAC-like%2C activated by AP3/PI;curator_summary=Encodes a member of the NAC transcription factor gene family. It is expressed in floral primordia and upregulated by AP3 and PI. Its expression is associated with leaf senescence.;symbol=NAP;Alias=ANAC029,Arabidopsis NAC domain containing protein 29,ATNAP,NAC-LIKE, ACTIVATED BY AP3/PI;full_name=NAC-like%2C activated …	GO:0044212,GO:0009825,GO:0009835,GO:0010150,GO:0003700,GO:0005634,GO:0006355,GO:0009793,GO:0005515,GO:0009908
brunioides	male-biased	OG0001531	AT1G17020	ID=AT1G17020;Name=AT1G17020;Note=senescence-related gene 1;curator_summary=Encodes a novel member of the Fe(II)/ascorbate oxidase gene family%3B senescence-related gene.;symbol=SRG1;Alias=ATSRG1,SENESCENCE-RELATED GENE 1;full_name=senescence-related gene 1;computational_description=senescence-related gene 1 (SRG1)%3B CONTAINS InterPro DOMAIN/s: Oxoglutarate/iron-dependent oxygenase (InterPro:IPR0…	GO:0005737,GO:0010150,GO:0051213,GO:0046872,GO:0016682,GO:0055114
brunioides	male-biased	OG0001789	AT4G18170	ID=AT4G18170;Name=AT4G18170;Note=WRKY DNA-binding protein 28;curator_summary=member of WRKY Transcription Factor%3B Group II-c. Involved in the activation of salicylic acid biosynthesis genes ICS1 and PBS3.;symbol=WRKY28;Alias=ATWRKY28;full_name=WRKY DNA-binding protein 28;computational_description=WRKY DNA-binding protein 28 (WRKY28)%3B CONTAINS InterPro DOMAIN/s: DNA-binding WRKY (InterPro:IPR0…	GO:0003700,GO:0006355,GO:0005634,GO:0042659,GO:0043565
brunioides	male-biased	OG0001906	AT4G35190	ID=AT4G35190;Name=AT4G35190;Note=Putative lysine decarboxylase family protein;symbol=LOG5;full_name=LONELY GUY 5;computational_description=Putative lysine decarboxylase family protein%3B CONTAINS InterPro DOMAIN/s: Conserved hypothetical protein CHP00730 (InterPro:IPR005269)%3B BEST Arabidopsis thaliana protein match is: lysine decarboxylase family protein (TAIR:AT2G37210.1)%3B Has 30201 Blast hi…	GO:0005829,GO:0005634,GO:0016799,GO:0009691
brunioides	male-biased	OG0002191	AT4G35160	ID=AT4G35160;Name=AT4G35160;Note=O-methyltransferase family protein;computational_description=O-methyltransferase family protein%3B FUNCTIONS IN: methyltransferase activity%2C O-methyltransferase activity%2C protein dimerization activity%3B LOCATED IN: cytosol%3B CONTAINS InterPro DOMAIN/s: Winged helix-turn-helix transcription repressor DNA-binding (InterPro:IPR011991)%2C Plant methyltransferase…	GO:0005737,GO:0030187,GO:0008757,GO:0005634,GO:0008171,GO:0008152,GO:0017096,GO:0019438,GO:0046983,GO:0032259,GO:0005829
brunioides	male-biased	OG0003056	AT1G43800	ID=AT1G43800;Name=AT1G43800;Note=Plant stearoyl-acyl-carrier-protein desaturase family protein;symbol=FTM1;Alias=SAD6,STEAROYL-ACYL CARRIER PROTEIN %26#916%3B9-DESATURASE6;full_name=FLORAL TRANSITION AT THE MERISTEM1;computational_description=Plant stearoyl-acyl-carrier-protein desaturase family protein%3B FUNCTIONS IN: acyl-[acyl-carrier-protein] desaturase activity%2C oxidoreductase activity%2C…	GO:0006633,GO:0006631,GO:0009570,GO:0102786,GO:0045300,GO:0071456,GO:0046872,GO:0055114,GO:0009507
brunioides	male-biased	OG0003061	AT5G66390	ID=AT5G66390;Name=AT5G66390;Note=Peroxidase superfamily protein;curator_summary=Encodes a peroxidase that is involved in lignin biosynthesis.;Alias=PRX72,PEROXIDASE 72;computational_description=Peroxidase superfamily protein%3B FUNCTIONS IN: peroxidase activity%2C heme binding%3B INVOLVED IN: response to oxidative stress%2C oxidation reduction%3B LOCATED IN: endomembrane system%3B EXPRESSED IN: l…	GO:0009809,GO:0020037,GO:0006979,GO:0042744,GO:0046872,GO:0004601,GO:0055114,GO:0005576
brunioides	male-biased	OG0003073	AT2G43000	ID=AT2G43000;Name=AT2G43000;Note=NAC domain containing protein 42;curator_summary=Encodes a NAC transcription factor induced by hydrogen peroxide (H2O2. Involved in senescence. Over expression of the gene strongly delays senescence and enhances tolerance to various abiotic stresses.;symbol=NAC042;Alias=ANAC042,NAC domain containing protein 42,JUB1,JUNGBRUNNEN 1;full_name=NAC domain containing pro…	GO:0010150,GO:0042538,GO:0006561,GO:0009718,GO:0003700,GO:0005634,GO:0005992,GO:1900056,GO:0010120,GO:0006355,GO:0003677
brunioides	male-biased	OG0003692	AT5G62020	ID=AT5G62020;Name=AT5G62020;Note=heat shock transcription factor B2A;curator_summary=member of Heat Stress Transcription Factor (Hsf) family;symbol=HSFB2A;Alias=AT-HSFB2A,ARABIDOPSIS THALIANA HEAT SHOCK TRANSCRIPTION FACTOR B2A;full_name=heat shock transcription factor B2A;computational_description=heat shock transcription factor B2A (HSFB2A)%3B FUNCTIONS IN: DNA binding%2C sequence-specific DNA …	GO:0044212,GO:0061408,GO:0010200,GO:0043565,GO:0003700,GO:0005634,GO:0043618,GO:0000978,GO:0034605
brunioides	male-biased	OG0003953	AT2G29420	ID=AT2G29420;Name=AT2G29420;Note=glutathione S-transferase tau 7;curator_summary=Encodes glutathione transferase belonging to the tau class of GSTs. Naming convention according to Wagner et al. (2002). Induced by Salicylic acid. Independent of NPR1 for their induction by salicylic acid.;symbol=GSTU7;Alias=ATGSTU7,glutathione S-transferase tau 7,GST25,GLUTATHIONE S-TRANSFERASE 25;full_name=glutath…	GO:0005737,GO:0004364,GO:0009751,GO:0009407,GO:0005829,GO:0006749
brunioides	male-biased	OG0004150
brunioides	male-biased	OG0004880	AT1G49570	ID=AT1G49570;Name=AT1G49570;Note=Peroxidase superfamily protein;computational_description=Peroxidase superfamily protein%3B FUNCTIONS IN: peroxidase activity%2C heme binding%3B INVOLVED IN: oxidation reduction%2C response to oxidative stress%3B LOCATED IN: endomembrane system%3B EXPRESSED IN: leaf lamina base%2C leaf whorl%2C hypocotyl%2C sepal%2C root%3B EXPRESSED DURING: 4 anthesis%3B CONTAINS …	GO:0020037,GO:0006979,GO:0042744,GO:0046872,GO:0004601,GO:0055114,GO:0005576
brunioides	male-biased	OG0006446	AT4G22920	ID=AT4G22920;Name=AT4G22920;Note=non-yellowing 1;curator_summary=Similar to the tomato senescence-inducible chloroplast stay-green protein 1. It is upregulated during maximal senescence in the Arabidopsis life cycle%2C especially in senescent leaves. Acts antagonistically with SGR2 to balance chlorophyll catabolism in chloroplasts with the dismantling and remobilizing of other cellular components…	GO:0009535,GO:0015996,GO:0016829,GO:0005515
brunioides	male-biased	OG0007756	AT4G37300	ID=AT4G37300;Name=AT4G37300;Note=maternal effect embryo arrest 59;symbol=MEE59;full_name=maternal effect embryo arrest 59;computational_description=maternal effect embryo arrest 59 (MEE59)%3B Has 70 Blast hits to 70 proteins in 15 species: Archae - 0%3B Bacteria - 0%3B Metazoa - 0%3B Fungi - 0%3B Plants - 70%3B Viruses - 0%3B Other Eukaryotes - 0 (source: NCBI BLink).;Dbxref=PMID:15634699,PMID:16…	GO:0003674,GO:0009793,GO:0005829,GO:0005634,GO:0005886
brunioides	male-biased	OG0010004	AT3G59480	ID=AT3G59480;Name=AT3G59480;Note=pfkB-like carbohydrate kinase family protein;computational_description=pfkB-like carbohydrate kinase family protein%3B FUNCTIONS IN: kinase activity%2C ribokinase activity%3B INVOLVED IN: D-ribose metabolic process%2C acetate fermentation%2C sucrose biosynthetic process%2C sucrose catabolic process%2C using beta-fructofuranosidase%3B LOCATED IN: cellular_component…	GO:0005737,GO:0019200,GO:0008865,GO:0005829,GO:0006000,GO:0005524,GO:0019252
brunioides	male-biased	OG0010169	AT1G07090	ID=AT1G07090;Name=AT1G07090;Note=LIGHT-DEPENDENT SHORT HYPOCOTYLS-like protein (DUF640);symbol=LSH6;full_name=LIGHT SENSITIVE HYPOCOTYLS 6;computational_description=LIGHT SENSITIVE HYPOCOTYLS 6 (LSH6)%3B CONTAINS InterPro DOMAIN/s: Protein of unknown function DUF640 (InterPro:IPR006936)%3B BEST Arabidopsis thaliana protein match is: Protein of unknown function (DUF640) (TAIR:AT5G58500.1)%3B Has 3…	GO:0005634,GO:0009416,GO:0007275,GO:0003677
brunioides	male-biased	OG0010383	AT1G73220	ID=AT1G73220;Name=AT1G73220;Note=organic cation/carnitine transporter1;symbol=OCT1;Alias=AtOCT1,organic cation/carnitine transporter1;full_name=organic cation/carnitine transporter1;computational_description=organic cation/carnitine transporter1 (1-Oct)%3B FUNCTIONS IN: carnitine transporter activity%2C carbohydrate transmembrane transporter activity%2C transporter activity%3B INVOLVED IN: transp…	GO:0010150,GO:0015226,GO:0016021,GO:0005886,GO:0015839,GO:0015144,GO:0005524
brunioides	male-biased	OG0010810	AT3G03430	ID=AT3G03430;Name=AT3G03430;Note=Calcium-binding EF-hand family protein;computational_description=Calcium-binding EF-hand family protein%3B FUNCTIONS IN: calcium ion binding%3B INVOLVED IN: biological_process unknown%3B LOCATED IN: cytoplasm%3B EXPRESSED IN: 9 plant structures%3B EXPRESSED DURING: L mature pollen stage%2C M germinated pollen stage%2C 4 anthesis%2C C globular stage%2C petal differ…	GO:0005737,GO:0008150,GO:0005509,GO:0005739
brunioides	male-biased	OG0011131	AT2G18370	ID=AT2G18370;Name=AT2G18370;Note=Bifunctional inhibitor/lipid-transfer protein/seed storage 2S albumin superfamily protein;curator_summary=Predicted to encode a PR (pathogenesis-related) protein. Belongs to the lipid transfer protein (PR-14) family with the following members: At2g38540/LTP1%2C At2g38530/LTP2%2C At5g59320/LTP3%2C At5g59310/LTP4%2C At3g51600/LTP5%2C At3g08770/LTP6%2C At2g15050/LTP7…	GO:0016020,GO:0005576,GO:0008289,GO:0006869
brunioides	male-biased	OG0011857	AT2G32210	ID=AT2G32210;Name=AT2G32210;Note=cysteine-rich/transmembrane domain A-like protein;computational_description=unknown protein%3B BEST Arabidopsis thaliana protein match is: unknown protein (TAIR:AT2G32190.1)%3B Has 214 Blast hits to 214 proteins in 21 species: Archae - 0%3B Bacteria - 0%3B Metazoa - 1%3B Fungi - 10%3B Plants - 203%3B Viruses - 0%3B Other Eukaryotes - 0 (source: NCBI BLink).;Dbxref…	GO:0016021,GO:0005886,GO:0005515,GO:0071456
brunioides	male-biased	OG0012139	AT5G66780	ID=AT5G66780;Name=AT5G66780;Note=late embryogenesis abundant protein;computational_description=unknown protein%3B Has 1807 Blast hits to 1807 proteins in 277 species: Archae - 0%3B Bacteria - 0%3B Metazoa - 736%3B Fungi - 347%3B Plants - 385%3B Viruses - 0%3B Other Eukaryotes - 339 (source: NCBI BLink).;Dbxref=PMID:14576160,PMID:15743445,locus:2174984;locus_type=protein_coding	GO:0003674,GO:0008150,GO:0009507
brunioides	male-biased	OG0012595	AT4G17030	ID=AT4G17030;Name=AT4G17030;Note=expansin-like B1;curator_summary=Encodes EXLB1 (expansin-like B1)%2C a member of the expansin family.;symbol=EXLB1;Alias=AT-EXPR,ATEXLB1,expansin-like B1,ATEXPR1,ATHEXP BETA 3.1,EXPR;full_name=expansin-like B1;computational_description=expansin-like B1 (EXLB1)%3B INVOLVED IN: sexual reproduction%2C unidimensional cell growth%2C plant-type cell wall loosening%3B LO…	GO:0005576,GO:0019953
brunioides	male-biased	OG0013216	AT3G50750	ID=AT3G50750;Name=AT3G50750;Note=BES1/BZR1 homolog 1;symbol=BEH1;full_name=BES1/BZR1 homolog 1;computational_description=BES1/BZR1 homolog 1 (BEH1)%3B FUNCTIONS IN: transcription regulator activity%3B INVOLVED IN: biological_process unknown%3B LOCATED IN: vacuole%3B EXPRESSED IN: 17 plant structures%3B EXPRESSED DURING: 12 growth stages%3B CONTAINS InterPro DOMAIN/s: BZR1%2C transcriptional repre…	GO:0009742,GO:0003700,GO:0005634,GO:0006355,GO:0005773,GO:0006351,GO:0003677
brunioides	male-biased	OG0014053	AT2G40095	ID=AT2G40095;Name=AT2G40095;Note=Alpha/beta hydrolase related protein;computational_description=Alpha/beta hydrolase related protein%3B CONTAINS InterPro DOMAIN/s: MENTAL domain (InterPro:IPR019498)%3B BEST Arabidopsis thaliana protein match is: Alpha/beta hydrolase related protein (TAIR:AT3G55880.2)%3B Has 87 Blast hits to 87 proteins in 13 species: Archae - 0%3B Bacteria - 0%3B Metazoa - 0%3B F…	GO:0016787,GO:0016021,GO:0008150,GO:0005739
brunioides	male-biased	OG0015450	AT3G53140	ID=AT3G53140;Name=AT3G53140;Note=O-methyltransferase family protein;computational_description=O-methyltransferase family protein%3B FUNCTIONS IN: methyltransferase activity%2C protein dimerization activity%2C O-methyltransferase activity%3B INVOLVED IN: biological_process unknown%3B CONTAINS InterPro DOMAIN/s: Winged helix-turn-helix transcription repressor DNA-binding (InterPro:IPR011991)%2C Pla…	GO:0008757,GO:0005829,GO:0008938,GO:0008171,GO:0008152,GO:0008168,GO:0019438,GO:0046983,GO:0032259,GO:1901847
brunioides	male-biased	OG0018019	AT2G47710	ID=AT2G47710;Name=AT2G47710;Note=Adenine nucleotide alpha hydrolases-like superfamily protein;computational_description=Adenine nucleotide alpha hydrolases-like superfamily protein%3B FUNCTIONS IN: molecular_function unknown%3B INVOLVED IN: response to stress%3B LOCATED IN: vacuole%3B EXPRESSED IN: 23 plant structures%3B EXPRESSED DURING: 13 growth stages%3B CONTAINS InterPro DOMAIN/s: UspA (Inte…	GO:0005737,GO:0016787,GO:0005794,GO:0005773,GO:0005829,GO:0005886
brunioides	female-biased	OG0006260	AT4G26810	ID=AT4G26810;Name=AT4G26810;Note=SWIB/MDM2 domain superfamily protein;computational_description=SWIB/MDM2 domain superfamily protein%3B CONTAINS InterPro DOMAIN/s: SWIB/MDM2 domain (InterPro:IPR003121)%3B BEST Arabidopsis thaliana protein match is: SWIB/MDM2 domain superfamily protein (TAIR:AT2G35605.1)%3B Has 1807 Blast hits to 1807 proteins in 277 species: Archae - 0%3B Bacteria - 0%3B Metazoa …	GO:0008150,GO:0005634,GO:0003674
brunioides	female-biased	OG0010852	AT3G12900	ID=AT3G12900;Name=AT3G12900;Note=2-oxoglutarate (2OG) and Fe(II)-dependent oxygenase superfamily protein;computational_description=2-oxoglutarate (2OG) and Fe(II)-dependent oxygenase superfamily protein%3B FUNCTIONS IN: oxidoreductase activity%2C acting on paired donors%2C with incorporation or reduction of molecular oxygen%2C 2-oxoglutarate as one donor%2C and incorporation of one atom each of o…	GO:0005737,GO:0106147,GO:0106145,GO:0051213,GO:0009805,GO:0016706,GO:0010039,GO:0046872,GO:0055114
brunioides	female-biased	OG0011524	ATMG00090	ID=ATMG00090;Note=structural constituent of ribosome%3Bprotein binding protein;Name=ATMG00090;curator_summary=ribosomal protein S3;symbol=RPS3;full_name=RESISTANCE TO PSEUDOMONAS SYRINGAE 3;computational_description=RESISTANCE TO PSEUDOMONAS SYRINGAE 3 (RPS3)%3B CONTAINS InterPro DOMAIN/s: K Homology%2C prokaryotic type (InterPro:IPR009019)%2C Ribosomal protein S3%2C N-terminal (InterPro:IPR00828…	GO:0009536,GO:0005840,GO:0005739,GO:0003735,GO:0003723,GO:0005515,GO:0005763,GO:0006412
dubium	male-biased	OG0000096	AT3G21240	ID=AT3G21240;Name=AT3G21240;Note=4-coumarate:CoA ligase 2;curator_summary=encodes an isoform of 4-coumarate:CoA ligase (4CL)%2C which is involved in the last step of the general phenylpropanoid pathway. The catalytic efficiency was in the following (descending) order: p-coumaric acid%2C caffeic acid%2C ferulic acid%2C 5-OH-ferulic acid and cinnamic acid. At4CL2 was unable to use sinapic acid as s…	GO:0016207,GO:0009620,GO:0009611,GO:0009411,GO:0009698,GO:0005524
dubium	male-biased	OG0000102	AT5G60390	ID=AT5G60390;Name=AT5G60390;Note=GTP binding Elongation factor Tu family protein;computational_description=GTP binding Elongation factor Tu family protein%3B FUNCTIONS IN: calmodulin binding%2C translation elongation factor activity%3B INVOLVED IN: translational elongation%3B LOCATED IN: mitochondrion%2C nucleus%2C plasma membrane%2C vacuole%2C cytoplasm%3B EXPRESSED IN: 6 plant structures%3B EXP…	GO:0005737,GO:0005773,GO:0005634,GO:0003924,GO:0005739,GO:0005886,GO:0003746,GO:0006414,GO:0006412,GO:0009506
dubium	male-biased	OG0000177	AT2G32060	ID=AT2G32060;Name=AT2G32060;Note=Ribosomal protein L7Ae/L30e/S12e/Gadd45 family protein;computational_description=Ribosomal protein L7Ae/L30e/S12e/Gadd45 family protein%3B FUNCTIONS IN: structural constituent of ribosome%3B INVOLVED IN: translation%3B LOCATED IN: cytosolic small ribosomal subunit%2C cytosolic ribosome%2C nucleus%3B EXPRESSED IN: 22 plant structures%3B EXPRESSED DURING: 13 growth …	GO:0022626,GO:0022627,GO:0005634,GO:0005777,GO:0003735,GO:0006412
dubium	male-biased	OG0000179	AT1G17950	ID=AT1G17950;Name=AT1G17950;Note=myb domain protein 52;curator_summary=putative transcription factor: R2R3-MYB transcription family;symbol=MYB52;Alias=ATMYB52,MYB DOMAIN PROTEIN 52,BW52;full_name=myb domain protein 52;computational_description=myb domain protein 52 (MYB52)%3B CONTAINS InterPro DOMAIN/s: SANT%2C DNA-binding (InterPro:IPR001005)%2C Homeodomain-like (InterPro:IPR009057)%2C Myb%2C DN…	GO:0044212,GO:0009737,GO:0071555,GO:0003700,GO:0005634,GO:0006355,GO:0009414,GO:1901347,GO:1901348,GO:0009834,GO:1902074,GO:2000652
dubium	male-biased	OG0000180	AT1G70710	ID=AT1G70710;Name=AT1G70710;Note=glycosyl hydrolase 9B1;curator_summary=endo-1%2C4-beta-glucanase. Involved in cell elongation.;symbol=GH9B1;Alias=ATGH9B1,glycosyl hydrolase 9B1,CEL1,CELLULASE 1;full_name=glycosyl hydrolase 9B1;computational_description=glycosyl hydrolase 9B1 (GH9B1)%3B FUNCTIONS IN: cellulase activity%2C hydrolase activity%2C hydrolyzing O-glycosyl compounds%3B INVOLVED IN: resp…	GO:0010583,GO:0042547,GO:0008810,GO:0030245,GO:0005576,GO:0009507
dubium	male-biased	OG0000217	AT3G23670	ID=AT3G23670;Name=AT3G23670;Note=phragmoplast-associated kinesin-related protein;curator_summary=Microtubule motor kinesin PAKRP1L/Kinesin-12B. Together with PAKRP1/Kinesin-12A%2C serve as linkers of the plus ends of antiparallel microtubules in the phragmoplast.;symbol=KINESIN-12B;computational_description=KINESIN-12B%3B FUNCTIONS IN: microtubule motor activity%2C plus-end-directed microtubule m…	GO:0008574,GO:0007112,GO:0000914,GO:0016887,GO:0008017,GO:0007018,GO:0009524,GO:0055046,GO:0005524,GO:0005515,GO:0080175,GO:0005871,GO:0005874,GO:0003777
dubium	male-biased	OG0000257	AT1G64190	ID=AT1G64190;Name=AT1G64190;Note=6-phosphogluconate dehydrogenase family protein;computational_description=6-phosphogluconate dehydrogenase family protein%3B FUNCTIONS IN: in 6 functions%3B INVOLVED IN: response to salt stress%3B LOCATED IN: chloroplast%2C membrane%3B EXPRESSED IN: 24 plant structures%3B EXPRESSED DURING: 14 growth stages%3B CONTAINS InterPro DOMAIN/s: 6-phosphogluconate dehydrog…	GO:0005737,GO:0050661,GO:0009536,GO:0008114,GO:0099503,GO:0009570,GO:0005829,GO:0046177,GO:0004616,GO:0005515,GO:0009051,GO:0009507
dubium	male-biased	OG0000278	AT5G13930	ID=AT5G13930;Name=AT5G13930;Note=Chalcone and stilbene synthase family protein;curator_summary=Encodes chalcone synthase (CHS)%2C a key enzyme involved in the biosynthesis of flavonoids. Required for the accumulation of purple anthocyanins in leaves and stems. Also involved in the regulation of auxin transport and the modulation of root gravitropism.;symbol=TT4;Alias=ATCHS,CHS,CHALCONE SYNTHASE;f…	GO:0009733,GO:0009629,GO:0009705,GO:0005783,GO:0009753,GO:0016210,GO:0005634,GO:0009715,GO:0009813,GO:0009611,GO:0009926,GO:0005515,GO:0010224,GO:0006979,GO:0005737,GO:0031540
dubium	male-biased	OG0000356	AT1G80760	ID=AT1G80760;Name=AT1G80760;Note=NOD26-like intrinsic protein 6%3B1;curator_summary=Encodes a protein with boron transporter activity. It helps to preferentially direct boron to young developing tissues in the shoot%2C such as immature leaves%2C under low boron conditions. This boron channel appears to be impermeable to water%2C unlike the closely related NIP5%3B1 boron transporter. This protein …	GO:0080029,GO:0015204,GO:0046713,GO:0046715,GO:0015250,GO:0015267,GO:0005886,GO:0015168,GO:0016021
dubium	male-biased	OG0000452	AT5G13930	ID=AT5G13930;Name=AT5G13930;Note=Chalcone and stilbene synthase family protein;curator_summary=Encodes chalcone synthase (CHS)%2C a key enzyme involved in the biosynthesis of flavonoids. Required for the accumulation of purple anthocyanins in leaves and stems. Also involved in the regulation of auxin transport and the modulation of root gravitropism.;symbol=TT4;Alias=ATCHS,CHS,CHALCONE SYNTHASE;f…	GO:0009733,GO:0009629,GO:0009705,GO:0005783,GO:0009753,GO:0016210,GO:0005634,GO:0009715,GO:0009813,GO:0009611,GO:0009926,GO:0005515,GO:0010224,GO:0006979,GO:0005737,GO:0031540
dubium	male-biased	OG0000457	AT1G15950	ID=AT1G15950;Name=AT1G15950;Note=cinnamoyl coa reductase 1;curator_summary=Encodes a cinnamoyl CoA reductase. Involved in lignin biosynthesis.;symbol=CCR1;Alias=ATCCR1,IRX4,IRREGULAR XYLEM 4;full_name=cinnamoyl coa reductase 1;computational_description=cinnamoyl coa reductase 1 (CCR1)%3B CONTAINS InterPro DOMAIN/s: NAD-dependent epimerase/dehydratase (InterPro:IPR001509)%2C NAD(P)-binding domain …	GO:0005737,GO:0050662,GO:0009809,GO:0016616,GO:0005829,GO:0016621,GO:0009409,GO:0007623,GO:0055114,GO:0016491
dubium	male-biased	OG0000461	ATMG00513	ID=ATMG00513;Note=NADH dehydrogenase 5A;Name=ATMG00513;curator_summary=Mitochondrial NADH dehydrogenase subunit 5. The gene is trans-spliced from three different pre-cursors%2C NAD5a%2C NAD5b and NAD5c.;symbol=NAD5A;Alias=NAD5.1,NADH DEHYDROGENASE 5.1,NAD5,NADH DEHYDROGENASE SUBUNIT 5;full_name=NADH dehydrogenase 5A;computational_description=NADH dehydrogenase 5A (NAD5A)%3B CONTAINS InterPro DOMA…	GO:0008137,GO:0016021,GO:0005739,GO:0042773,GO:0005743,GO:0045333,GO:0005747,GO:0070469,GO:0003954,GO:0055114
dubium	male-biased	OG0000464	AT5G10360	ID=AT5G10360;Name=AT5G10360;Note=Ribosomal protein S6e;curator_summary=RPS6A and RPS6B are fully redundant and essential during gametogenesis.;symbol=EMB3010;Alias=RPS6B,Ribosomal protein small subunit 6b;full_name=embryo defective 3010;computational_description=embryo defective 3010 (EMB3010)%3B FUNCTIONS IN: structural constituent of ribosome%3B INVOLVED IN: growth%2C translation%2C embryo deve…	GO:0005829,GO:0022626,GO:0022627,GO:0005634,GO:0009793,GO:0005886,GO:0006412,GO:0009506,GO:0003729
dubium	male-biased	OG0000513
dubium	male-biased	OG0000602	AT5G60740	ID=AT5G60740;Name=AT5G60740;Note=ABC transporter family protein;symbol=ABCG28;full_name=ATP-binding cassette G28;computational_description=ABC transporter family protein%3B FUNCTIONS IN: ATPase activity%2C coupled to transmembrane movement of substances%3B LOCATED IN: endomembrane system%3B EXPRESSED IN: 10 plant structures%3B EXPRESSED DURING: L mature pollen stage%2C M germinated pollen stage%2…	GO:0042626,GO:0016021,GO:0016887,GO:0005886,GO:0055085,GO:0005524
dubium	male-biased	OG0000628	AT4G34530	ID=AT4G34530;Name=AT4G34530;Note=cryptochrome-interacting basic-helix-loop-helix 1;curator_summary=Encodes a transcription factor CIB1 (cryptochrome-interacting basic-helix-loop-helix). CIB1 interacts with CRY2 (cryptochrome 2) in a blue light-specific manner in yeast and Arabidopsis cells%2C and it acts together with additional CIB1-related proteins to promote CRY2-dependent floral initiation. C…	GO:0003700,GO:0009911,GO:0009637,GO:0006355,GO:0006351,GO:0005515,GO:0003677,GO:0046983,GO:0009908,GO:0005634
dubium	male-biased	OG0000896	AT2G17230	ID=AT2G17230;Name=AT2G17230;Note=EXORDIUM like 5;symbol=EXL5;full_name=EXORDIUM like 5;computational_description=EXORDIUM like 5 (EXL5)%3B FUNCTIONS IN: molecular_function unknown%3B INVOLVED IN: biological_process unknown%3B LOCATED IN: endomembrane system%3B EXPRESSED IN: 22 plant structures%3B EXPRESSED DURING: 13 growth stages%3B CONTAINS InterPro DOMAIN/s: Phosphate-induced protein 1 (InterP…	GO:0048046,GO:0005576,GO:0005615
dubium	male-biased	OG0000977	AT1G18370	ID=AT1G18370;Name=AT1G18370;Note=ATP binding microtubule motor family protein;curator_summary=Encodes a kinesin HINKEL. Required for cytokinesis in pollen. Mutant has cytokinesis defects%3B seedling lethal.;symbol=HIK;Alias=ATNACK1,ARABIDOPSIS NPK1-ACTIVATING KINESIN 1,NACK1,NPK1-ACTIVATING KINESIN 1;full_name=HINKEL;computational_description=HINKEL (HIK)%3B FUNCTIONS IN: microtubule motor activi…	GO:0000910,GO:0010583,GO:0009524,GO:0009555,GO:0005634,GO:0009558,GO:0007018,GO:0003777,GO:0016887,GO:0005871,GO:0005874,GO:0008017,GO:0005524,GO:0048229
dubium	male-biased	OG0001018	AT1G15520	ID=AT1G15520;Name=AT1G15520;Note=pleiotropic drug resistance 12;curator_summary=ABC transporter family involved in ABA transport and resistance to lead. Localizes to plasma membrane. Upregulated by lead. Expressed in leaves%2C flowers%2C stomata and roots.;symbol=ABCG40;Alias=ATABCG40,Arabidopsis thaliana ATP-binding cassette G40,ATPDR12,PLEIOTROPIC DRUG RESISTANCE 12,PDR12,pleiotropic drug resis…	GO:0042626,GO:0009751,GO:0016887,GO:0009753,GO:0002229,GO:0016021,GO:0005739,GO:0009723,GO:0015692,GO:0005515,GO:0010193,GO:0005886,GO:0080168,GO:0055085,GO:0005524,GO:0046865
dubium	male-biased	OG0001123	AT1G08250	ID=AT1G08250;Name=AT1G08250;Note=arogenate dehydratase 6;curator_summary=Encodes a plastid-localized arogenate dehydratase involved in phenylalanine biosynthesis. Although this enzyme has sequence similarity to prephenate dehydratases%2C it is 98 times more active with arogenate than prephenate in enzymatic assays.;symbol=ADT6;Alias=AtADT6,Arabidopsis thaliana arogenate dehydratase 6;full_name=ar…	GO:0005737,GO:0009570,GO:0004664,GO:0009094,GO:0047769,GO:0009507
dubium	male-biased	OG0001182	AT5G13930	ID=AT5G13930;Name=AT5G13930;Note=Chalcone and stilbene synthase family protein;curator_summary=Encodes chalcone synthase (CHS)%2C a key enzyme involved in the biosynthesis of flavonoids. Required for the accumulation of purple anthocyanins in leaves and stems. Also involved in the regulation of auxin transport and the modulation of root gravitropism.;symbol=TT4;Alias=ATCHS,CHS,CHALCONE SYNTHASE;f…	GO:0009733,GO:0009629,GO:0009705,GO:0005783,GO:0009753,GO:0016210,GO:0005634,GO:0009715,GO:0009813,GO:0009611,GO:0009926,GO:0005515,GO:0010224,GO:0006979,GO:0005737,GO:0031540
dubium	male-biased	OG0001195	AT4G08850	ID=AT4G08850;Name=AT4G08850;Note=Leucine-rich repeat receptor-like protein kinase family protein;computational_description=Leucine-rich repeat receptor-like protein kinase family protein%3B FUNCTIONS IN: kinase activity%3B INVOLVED IN: protein amino acid phosphorylation%3B LOCATED IN: plasma membrane%2C membrane%3B EXPRESSED IN: 23 plant structures%3B EXPRESSED DURING: 13 growth stages%3B CONTAIN…	GO:0009755,GO:0006468,GO:0016021,GO:0016301,GO:0004674,GO:0010183,GO:0005515,GO:0005886,GO:0009506,GO:0090406,GO:0005524
dubium	male-biased	OG0001198	AT4G25810	ID=AT4G25810;Name=AT4G25810;Note=xyloglucan endotransglycosylase 6;curator_summary=xyloglucan endotransglycosylase-related protein (XTR6);symbol=XTR6;Alias=XTH23,xyloglucan endotransglucosylase/hydrolase 23;full_name=xyloglucan endotransglycosylase 6;computational_description=xyloglucan endotransglycosylase 6 (XTR6)%3B FUNCTIONS IN: hydrolase activity%2C acting on glycosyl bonds%2C xyloglucan:xyl…	GO:0005794,GO:0042546,GO:0005618,GO:0048046,GO:0071555,GO:0005576,GO:0016762,GO:0004553,GO:0010411
dubium	male-biased	OG0001220	AT5G42800	ID=AT5G42800;Name=AT5G42800;Note=dihydroflavonol 4-reductase;curator_summary=dihydroflavonol reductase. Catalyzes the conversion of dihydroquercetin to leucocyanidin in the biosynthesis of anthocyanins. Not expressed in roots (qRT-PCR).;symbol=DFR;Alias=M318,TT3;full_name=dihydroflavonol 4-reductase;computational_description=dihydroflavonol 4-reductase (DFR)%3B CONTAINS InterPro DOMAIN/s: NAD-dep…	GO:0009718,GO:0042406,GO:0016616,GO:0050662,GO:0047890,GO:0045552,GO:0005515,GO:0055114,GO:0016491
dubium	male-biased	OG0001311	AT1G30690	ID=AT1G30690;Name=AT1G30690;Note=Sec14p-like phosphatidylinositol transfer family protein;computational_description=Sec14p-like phosphatidylinositol transfer family protein%3B FUNCTIONS IN: transporter activity%3B INVOLVED IN: transport%3B LOCATED IN: cytosol%2C nucleus%2C plasma membrane%3B EXPRESSED IN: 23 plant structures%3B EXPRESSED DURING: 14 growth stages%3B CONTAINS InterPro DOMAIN/s: Cel…	GO:0071365,GO:1901703,GO:0005634,GO:0008289,GO:0051301,GO:0005886,GO:0005829,GO:0007049
dubium	male-biased	OG0001380	AT1G75500	ID=AT1G75500;Name=AT1G75500;Note=Walls Are Thin 1;curator_summary=An Arabidopsis thaliana homolog of Medicago truncatula NODULIN21 (MtN21). The gene encodes a plant-specific%2C predicted integral membrane protein and is a member of the Plant-Drug/Metabolite Exporter (P-DME) family (Transporter Classification number: TC 2.A.7.3) and the nodulin MtN21-like transporter family.;symbol=WAT1;Alias=UMAM…	GO:0009826,GO:0090355,GO:0009834,GO:0010315,GO:0009734,GO:0005774,GO:0016021,GO:0000162,GO:0005739,GO:0090358,GO:0006952,GO:0071555,GO:0022857,GO:0009851,GO:0005886,GO:0009705
dubium	male-biased	OG0001389	AT4G17500	ID=AT4G17500;Name=AT4G17500;Note=ethylene responsive element binding factor 1;curator_summary=Encodes a member of the ERF (ethylene response factor) subfamily B-3 of ERF/AP2 transcription factor family (ATERF-1). The protein contains one AP2 domain. There are 18 members in this subfamily including ATERF-1%2C ATERF-2%2C AND ATERF-5.;symbol=ERF-1;Alias=ATERF-1,ethylene responsive element binding fa…	GO:0044212,GO:0010200,GO:0003700,GO:0005634,GO:0003677,GO:0001944,GO:0009624,GO:0006952,GO:0006355,GO:0045893,GO:0009873,GO:0051301
dubium	male-biased	OG0001409	AT4G31940	ID=AT4G31940;Name=AT4G31940;Note=cytochrome P450%2C family 82%2C subfamily C%2C polypeptide 4;curator_summary=The gene encodes a cytochrome P450 enzyme%2C CYP82C. It is involved in the early Fe deficiency response.;symbol=CYP82C4;full_name=cytochrome P450%2C family 82%2C subfamily C%2C polypeptide 4;computational_description=cytochrome P450%2C family 82%2C subfamily C%2C polypeptide 4 (CYP82C4)%3…	GO:0106146,GO:0071281,GO:0106144,GO:0020037,GO:0016709,GO:0016021,GO:0016020,GO:0004497,GO:0010039,GO:0005506,GO:0055114,GO:0009507
dubium	male-biased	OG0001413
dubium	male-biased	OG0001452	AT1G75030	ID=AT1G75030;Name=AT1G75030;Note=thaumatin-like protein 3;curator_summary=encodes a PR5-like protein;symbol=TLP-3;Alias=ATLP-3,thaumatin-like protein 3;full_name=thaumatin-like protein 3;computational_description=thaumatin-like protein 3 (TLP-3)%3B FUNCTIONS IN: molecular_function unknown%3B INVOLVED IN: response to other organism%3B LOCATED IN: endomembrane system%3B EXPRESSED IN: 21 plant struc…	GO:0006952,GO:0005576,GO:0003674
dubium	male-biased	OG0001527	AT3G51240	ID=AT3G51240;Name=AT3G51240;Note=flavanone 3-hydroxylase;curator_summary=Encodes flavanone 3-hydroxylase that is coordinately expressed with chalcone synthase and chalcone isomerases. Regulates flavonoid biosynthesis. Not responsive to auxin or ethylene stimulus (qRT-PCR).;symbol=F3H;Alias=F3'H,TT6,TRANSPARENT TESTA 6;full_name=flavanone 3-hydroxylase;computational_description=flavanone 3-hydroxy…	GO:0005737,GO:0031418,GO:0046872,GO:0051213,GO:0009813,GO:0055114,GO:0010224,GO:0005524,GO:0045486
dubium	male-biased	OG0001531	AT1G17020	ID=AT1G17020;Name=AT1G17020;Note=senescence-related gene 1;curator_summary=Encodes a novel member of the Fe(II)/ascorbate oxidase gene family%3B senescence-related gene.;symbol=SRG1;Alias=ATSRG1,SENESCENCE-RELATED GENE 1;full_name=senescence-related gene 1;computational_description=senescence-related gene 1 (SRG1)%3B CONTAINS InterPro DOMAIN/s: Oxoglutarate/iron-dependent oxygenase (InterPro:IPR0…	GO:0005737,GO:0010150,GO:0051213,GO:0046872,GO:0016682,GO:0055114
dubium	male-biased	OG0001549	AT1G33470	ID=AT1G33470;Name=AT1G33470;Note=RNA-binding (RRM/RBD/RNP motifs) family protein;computational_description=RNA-binding (RRM/RBD/RNP motifs) family protein%3B FUNCTIONS IN: RNA binding%2C nucleotide binding%2C nucleic acid binding%3B INVOLVED IN: biological_process unknown%3B LOCATED IN: cellular_component unknown%3B CONTAINS InterPro DOMAIN/s: RNA recognition motif%2C RNP-1 (InterPro:IPR000504)%2…	GO:0005576,GO:0003729
dubium	male-biased	OG0001678	AT4G37250	ID=AT4G37250;Name=AT4G37250;Note=Leucine-rich repeat protein kinase family protein;computational_description=Leucine-rich repeat protein kinase family protein%3B FUNCTIONS IN: protein serine/threonine kinase activity%2C kinase activity%2C ATP binding%3B INVOLVED IN: transmembrane receptor protein tyrosine kinase signaling pathway%2C protein amino acid phosphorylation%3B LOCATED IN: endomembrane s…	GO:0006468,GO:0016310,GO:0016021,GO:0016301,GO:0004674,GO:0005576,GO:0005515,GO:0005524
dubium	male-biased	OG0001686	AT1G19180	ID=AT1G19180;Name=AT1G19180;Note=jasmonate-zim-domain protein 1;curator_summary=JAZ1 is a nuclear-localized protein involved in jasmonate signaling. JAZ1 transcript levels rise in response to a jasmonate stimulus. JAZ1 can interact with the COI1 F-box subunit of an SCF E3 ubiquitin ligase in a yeast-two-hybrid assay only in the presence of jasmonate-isoleucine (JA-ILE) or coronatine. Application …	GO:0009555,GO:0009753,GO:0005634,GO:0009867,GO:0009611,GO:2000022,GO:0042742,GO:0005515,GO:0009908,GO:0031347,GO:1900067
dubium	male-biased	OG0001692	AT1G09560	ID=AT1G09560;Name=AT1G09560;Note=germin-like protein 5;curator_summary=Encodes a plasodesmata-located protein involved in regulating primary root growth by controlling phloem-mediated allocation of resources between the primary and lateral root meristems.;symbol=GLP5;Alias=PDGLP1,PLASMODESMAL GERMIN-LIKE PROTEIN 1;full_name=germin-like protein 5;computational_description=germin-like protein 5 (GL…	GO:0010497,GO:0005618,GO:0005634,GO:0030145,GO:2000280,GO:0048046,GO:0006950,GO:0005576,GO:0045735,GO:0009409,GO:0009506
dubium	male-biased	OG0001709	AT5G63450	ID=AT5G63450;Name=AT5G63450;Note=cytochrome P450%2C family 94%2C subfamily B%2C polypeptide 1;curator_summary=member of CYP94B;symbol=CYP94B1;full_name=cytochrome P450%2C family 94%2C subfamily B%2C polypeptide 1;computational_description=cytochrome P450%2C family 94%2C subfamily B%2C polypeptide 1 (CYP94B1)%3B FUNCTIONS IN: electron carrier activity%2C monooxygenase activity%2C iron ion binding%…	GO:0052694,GO:0020037,GO:0016021,GO:0016705,GO:0009611,GO:0009694,GO:0005506,GO:0055114,GO:0009507
dubium	male-biased	OG0001742
dubium	male-biased	OG0001760	AT5G06790	ID=AT5G06790;Name=AT5G06790;Note=cotton fiber protein;computational_description=unknown protein%3B FUNCTIONS IN: molecular_function unknown%3B INVOLVED IN: biological_process unknown%3B LOCATED IN: chloroplast%3B EXPRESSED IN: 9 plant structures%3B EXPRESSED DURING: LP.04 four leaves visible%2C LP.02 two leaves visible%2C petal differentiation and expansion stage%2C D bilateral stage%3B BEST Arab…	GO:0008150,GO:0003674
dubium	male-biased	OG0002006	AT4G39410	ID=AT4G39410;Name=AT4G39410;Note=WRKY DNA-binding protein 13;curator_summary=member of WRKY Transcription Factor%3B Group II-c;symbol=WRKY13;Alias=ATWRKY13,ARABIDOPSIS THALIANA WRKY DNA-BINDING PROTEIN 13;full_name=WRKY DNA-binding protein 13;computational_description=WRKY DNA-binding protein 13 (WRKY13)%3B FUNCTIONS IN: sequence-specific DNA binding transcription factor activity%3B INVOLVED IN: …	GO:1904369,GO:0044212,GO:0003700,GO:0005634,GO:0045893,GO:0000978,GO:1901141
dubium	male-biased	OG0002404	AT1G14520	ID=AT1G14520;Name=AT1G14520;Note=myo-inositol oxygenase 1;curator_summary=Encodes MIOX1. Belongs to myo-inositol oxygenase gene family.;symbol=MIOX1;full_name=myo-inositol oxygenase 1;computational_description=myo-inositol oxygenase 1 (MIOX1)%3B FUNCTIONS IN: inositol oxygenase activity%2C oxidoreductase activity%3B INVOLVED IN: syncytium formation%3B LOCATED IN: cytoplasm%3B EXPRESSED IN: 6 plan…	GO:0005737,GO:0019853,GO:0019310,GO:0006949,GO:0050113,GO:0005506,GO:0055114
dubium	male-biased	OG0002475	AT4G37540	ID=AT4G37540;Name=AT4G37540;Note=LOB domain-containing protein 39;symbol=LBD39;full_name=LOB domain-containing protein 39;computational_description=LOB domain-containing protein 39 (LBD39)%3B CONTAINS InterPro DOMAIN/s: Lateral organ boundaries%2C LOB (InterPro:IPR004883)%3B BEST Arabidopsis thaliana protein match is: LOB domain-containing protein 38 (TAIR:AT3G49940.1)%3B Has 571 Blast hits to 57…	GO:0005575,GO:0010468
dubium	male-biased	OG0002533	AT5G61480	ID=AT5G61480;Name=AT5G61480;Note=Leucine-rich repeat protein kinase family protein;curator_summary=Encodes PXY%2C a receptor-like kinase essential for maintaining polarity during plant vascular-tissue development.;symbol=PXY;Alias=TDR,TDIF receptor;full_name=PHLOEM INTERCALATED WITH XYLEM;computational_description=PHLOEM INTERCALATED WITH XYLEM (PXY)%3B FUNCTIONS IN: protein serine/threonine kina…	GO:0009755,GO:0006468,GO:0010089,GO:0010067,GO:0016021,GO:0001944,GO:0004674,GO:0051301,GO:0005515,GO:0005886,GO:0010223,GO:0005524
dubium	male-biased	OG0002601	AT3G04400	ID=AT3G04400;Name=AT3G04400;Note=Ribosomal protein L14p/L23e family protein;symbol=emb2171;full_name=embryo defective 2171;computational_description=embryo defective 2171 (emb2171)%3B FUNCTIONS IN: structural constituent of ribosome%3B INVOLVED IN: translation%2C embryo development ending in seed dormancy%3B LOCATED IN: ribosome%2C cytosolic large ribosomal subunit%3B EXPRESSED IN: 23 plant struc…	GO:0009793,GO:0022625,GO:0005829,GO:0006412,GO:0009507
dubium	male-biased	OG0002604	AT5G05320	ID=AT5G05320;Name=AT5G05320;Note=FAD/NAD(P)-binding oxidoreductase family protein;computational_description=FAD/NAD(P)-binding oxidoreductase family protein%3B FUNCTIONS IN: monooxygenase activity%3B INVOLVED IN: oxidation reduction%3B LOCATED IN: cellular_component unknown%3B EXPRESSED IN: 8 plant structures%3B EXPRESSED DURING: 9 growth stages%3B CONTAINS InterPro DOMAIN/s: Monooxygenase%2C FAD…	GO:0004497,GO:0071949,GO:0055114,GO:0009507
dubium	male-biased	OG0002755	AT3G55350	ID=AT3G55350;Name=AT3G55350;Note=PIF / Ping-Pong family of plant transposase;computational_description=PIF / Ping-Pong family of plant transposases%3B FUNCTIONS IN: molecular_function unknown%3B INVOLVED IN: N-terminal protein myristoylation%3B LOCATED IN: cellular_component unknown%3B EXPRESSED IN: 20 plant structures%3B EXPRESSED DURING: 11 growth stages%3B CONTAINS InterPro DOMAIN/s: Putative …	GO:0004518,GO:0005634,GO:0046872
dubium	male-biased	OG0002827	AT2G03500	ID=AT2G03500;Name=AT2G03500;Note=Homeodomain-like superfamily protein;curator_summary=Encodes a nuclear localized member of the MYB family of transcriptional regulators that is involved in negative regulation of flowering. It is expressed in vascular tissues and at low levels in the shoot apex during the transition to flowering. Loss of function mutations are early flowering.EFM is involved in th…	GO:0009740,GO:0003700,GO:0010452,GO:0048579,GO:1903507,GO:0006355,GO:0005515,GO:0003677,GO:0009908,GO:0005634,GO:0009266
dubium	male-biased	OG0002899	AT3G53260	ID=AT3G53260;Name=AT3G53260;Note=phenylalanine ammonia-lyase 2;curator_summary=Encodes phenylalanine lyase. Arabidopsis has four PALs: AT2G37040 (PAL1)%2C AT3G53260 (PAL2)%2C AT5G04230 (PAL3) and AT3G10340 (PAL4).;symbol=PAL2;Alias=ATPAL2;full_name=phenylalanine ammonia-lyase 2;computational_description=phenylalanine ammonia-lyase 2 (PAL2)%3B FUNCTIONS IN: phenylalanine ammonia-lyase activity%3B …	GO:0005737,GO:0016841,GO:0080167,GO:0006559,GO:0005829,GO:0009800,GO:0009611,GO:0006952,GO:0045548,GO:0005515,GO:0006979,GO:0009699
dubium	male-biased	OG0002948	AT3G22810	ID=AT3G22810;Name=AT3G22810;Note=auxin canalization protein (DUF828);computational_description=FUNCTIONS IN: phosphoinositide binding%3B INVOLVED IN: signal transduction%3B LOCATED IN: cellular_component unknown%3B EXPRESSED IN: 10 plant structures%3B EXPRESSED DURING: 4 anthesis%2C F mature embryo stage%2C petal differentiation and expansion stage%2C E expanded cotyledon stage%2C D bilateral sta…	GO:0009734,GO:0010087,GO:0010305,GO:0005634,GO:0005802,GO:0035091,GO:0007165,GO:0009507
dubium	male-biased	OG0003082	AT5G59240	ID=AT5G59240;Name=AT5G59240;Note=Ribosomal protein S8e family protein;computational_description=Ribosomal protein S8e family protein%3B FUNCTIONS IN: structural constituent of ribosome%3B INVOLVED IN: translation%2C ribosome biogenesis%3B LOCATED IN: cytosolic small ribosomal subunit%2C cytosolic ribosome%2C ribosome%2C membrane%3B EXPRESSED IN: 11 plant structures%3B EXPRESSED DURING: 4 anthesis…	GO:0005737,GO:0022626,GO:0022627,GO:0003735,GO:0000462,GO:0006412
dubium	male-biased	OG0003136	AT5G06570	ID=AT5G06570;Name=AT5G06570;Note=alpha/beta-Hydrolases superfamily protein;computational_description=alpha/beta-Hydrolases superfamily protein%3B FUNCTIONS IN: hydrolase activity%3B INVOLVED IN: metabolic process%3B LOCATED IN: cellular_component unknown%3B EXPRESSED IN: 6 plant structures%3B EXPRESSED DURING: petal differentiation and expansion stage%3B CONTAINS InterPro DOMAIN/s: Alpha/beta hyd…	GO:0016787,GO:0009056,GO:0080030
dubium	male-biased	OG0003199	AT5G04060	ID=AT5G04060;Name=AT5G04060;Note=S-adenosyl-L-methionine-dependent methyltransferases superfamily protein;computational_description=S-adenosyl-L-methionine-dependent methyltransferases superfamily protein%3B CONTAINS InterPro DOMAIN/s: Protein of unknown function DUF248%2C methyltransferase putative (InterPro:IPR004159)%3B BEST Arabidopsis thaliana protein match is: S-adenosyl-L-methionine-depend…	GO:0005737,GO:0005794,GO:0016021,GO:0005802,GO:0000139,GO:0008168,GO:0032259,GO:0005768
dubium	male-biased	OG0003356
dubium	male-biased	OG0003440	AT4G37080	ID=AT4G37080;Name=AT4G37080;Note=ternary complex factor MIP1 leucine-zipper protein (Protein of unknown function%2C DUF547);computational_description=Protein of unknown function%2C DUF547%3B CONTAINS InterPro DOMAIN/s: Protein of unknown function DUF547 (InterPro:IPR006869)%3B BEST Arabidopsis thaliana protein match is: Protein of unknown function%2C DUF547 (TAIR:AT5G42690.2)%3B Has 1854 Blast hi…	GO:0008150,GO:0005634,GO:0003674
dubium	male-biased	OG0003583	AT2G34680	ID=AT2G34680;Name=AT2G34680;Note=Outer arm dynein light chain 1 protein;curator_summary=isolated from differential screening of a cDNA library from auxin-treated root culture. sequence does not show homology to any known proteins and is predicted to be extracellular.;symbol=AIR9;full_name=AUXIN-INDUCED IN ROOT CULTURES 9;computational_description=AUXIN-INDUCED IN ROOT CULTURES 9 (AIR9)%3B INVOLVE…	GO:0009733,GO:0005634,GO:0005515,GO:0005886,GO:0010102,GO:0009506
dubium	male-biased	OG0003633	AT1G21270	ID=AT1G21270;Name=AT1G21270;Note=wall-associated kinase 2;curator_summary=cytoplasmic serine/threonine protein kinase induced by salicylic acid. mutant plants exhibit a loss of cell expansion and dependence on sugars and salts for seedling growth%2C affecting the expression and activity of vacuolar invertase.;symbol=WAK2;full_name=wall-associated kinase 2;computational_description=wall-associated…	GO:0009826,GO:0006468,GO:0009751,GO:0009992,GO:0009311,GO:0016021,GO:0030247,GO:0005623,GO:0004674,GO:0005509,GO:0007166,GO:0005886,GO:0005634,GO:0005524
dubium	male-biased	OG0003818	AT2G01390	ID=AT2G01390;Name=AT2G01390;Note=Tetratricopeptide repeat (TPR)-like superfamily protein;symbol=EMB3111;full_name=EMBRYO DEFECTIVE 3111;computational_description=Tetratricopeptide repeat (TPR)-like superfamily protein%3B INVOLVED IN: biological_process unknown%3B LOCATED IN: chloroplast%3B CONTAINS InterPro DOMAIN/s: Pentatricopeptide repeat (InterPro:IPR002885)%3B BEST Arabidopsis thaliana prote…	GO:0005739
dubium	male-biased	OG0004230	AT3G19450	ID=AT3G19450;Name=AT3G19450;Note=GroES-like zinc-binding alcohol dehydrogenase family protein;curator_summary=Encodes a catalytically active cinnamyl alcohol dehydrogenase which uses p-coumaryl aldehyde as a preferred substrate. It can also use caffeyl%2C coniferyl and d-hydroxyconiferyl aldehydes as substrates.;symbol=ATCAD4;computational_description=ATCAD4%3B CONTAINS InterPro DOMAIN/s: GroES-l…	GO:0005737,GO:0009809,GO:0016616,GO:0005829,GO:0052747,GO:0045551,GO:0008270,GO:0080167,GO:0055114
dubium	male-biased	OG0004450	AT1G61720	ID=AT1G61720;Name=AT1G61720;Note=NAD(P)-binding Rossmann-fold superfamily protein;curator_summary=Negative regulator of flavonoid biosynthesis%2C mutants accumulate flavonoid pigments in their seed coat%2C putative oxidoreductase. It is thought that a ternary complex composed of TT2%2C TT8 and TTG1 is necessary for correct expression of BAN in seed endothelium.;symbol=BAN;full_name=BANYULS;comput…	GO:0050662,GO:0016616,GO:0009964,GO:0033729,GO:0009813,GO:0009507,GO:0055114,GO:0016491
dubium	male-biased	OG0004586	AT5G16250	ID=AT5G16250;Name=AT5G16250;Note=transmembrane protein;computational_description=unknown protein%3B BEST Arabidopsis thaliana protein match is: unknown protein (TAIR:AT3G02640.1)%3B Has 1807 Blast hits to 1807 proteins in 277 species: Archae - 0%3B Bacteria - 0%3B Metazoa - 736%3B Fungi - 347%3B Plants - 385%3B Viruses - 0%3B Other Eukaryotes - 339 (source: NCBI BLink).;Dbxref=PMID:18650403,PMID:…	GO:0003674,GO:0016021,GO:0008150,GO:0009507
dubium	male-biased	OG0004632	AT3G61220	ID=AT3G61220;Name=AT3G61220;Note=NAD(P)-binding Rossmann-fold superfamily protein;curator_summary=CytADR/SDR1 is an aldehyde reductase that catalyzes the reduction of the aldehyde carbonyl groups on alpha%2Cbeta-unsaturated aldehydes with more than 5 carbons in vitro. It can also act on menthone and neomenthol in vitro%2C but these do not represent likely endogenous activities of this enzyme in p…	GO:0005737,GO:0008106,GO:0080167,GO:0005829,GO:0016020,GO:0006952,GO:0047501,GO:0047504,GO:0005886,GO:0055114
dubium	male-biased	OG0004653	AT1G62360	ID=AT1G62360;Name=AT1G62360;Note=KNOX/ELK homeobox transcription factor;curator_summary=Class I knotted-like homeodomain protein that is required for shoot apical meristem (SAM) formation during embryogenesis and for SAM function throughout the lifetime of the plant. Functions by preventing incorporation of cells in the meristem center into differentiating organ primordia.;symbol=STM;Alias=BUM1,B…	GO:0010582,GO:0005737,GO:0048440,GO:0015630,GO:0009934,GO:0043565,GO:0003700,GO:0005634,GO:0006355,GO:0009691,GO:0005515,GO:0005886,GO:0003723,GO:0005768,GO:0019827,GO:0009506,GO:0042803
dubium	male-biased	OG0004906	AT5G40580	ID=AT5G40580;Name=AT5G40580;Note=20S proteasome beta subunit PBB2;curator_summary=Encodes 20S proteasome beta subunit PBB2 (PBB2).;symbol=PBB2;full_name=20S proteasome beta subunit PBB2;computational_description=20S proteasome beta subunit PBB2 (PBB2)%3B FUNCTIONS IN: peptidase activity%2C endopeptidase activity%2C threonine-type endopeptidase activity%3B INVOLVED IN: ubiquitin-dependent protein …	GO:0005737,GO:0004175,GO:0005839,GO:0043161,GO:0005634,GO:0010498,GO:0010499,GO:0004298,GO:0006511,GO:0000502,GO:0009536
dubium	male-biased	OG0004961	AT5G28060	ID=AT5G28060;Name=AT5G28060;Note=Ribosomal protein S24e family protein;computational_description=Ribosomal protein S24e family protein%3B FUNCTIONS IN: structural constituent of ribosome%2C nucleotide binding%3B INVOLVED IN: translation%2C ribosome biogenesis%3B LOCATED IN: cytosolic small ribosomal subunit%2C cytosolic ribosome%2C ribosome%2C cell wall%2C membrane%3B EXPRESSED IN: 23 plant struc…	GO:0005737,GO:0009536,GO:0022626,GO:0022627,GO:0005618,GO:0006412
dubium	male-biased	OG0005008	AT1G60790	ID=AT1G60790;Name=AT1G60790;Note=trichome birefringence-like protein (DUF828);curator_summary=Encodes a member of the TBL (TRICHOME BIREFRINGENCE-LIKE) gene family containing a plant-specific DUF231 (domain of unknown function) domain. TBL gene family has 46 members%2C two of which (TBR/AT5G06700 and TBL3/AT5G01360) have been shown to be involved in the synthesis and deposition of secondary wall …	GO:0005794,GO:0016021,GO:0016413
dubium	male-biased	OG0005039	AT4G34555	ID=AT4G34555;Name=AT4G34555;Note=Ribosomal protein S25 family protein;computational_description=Ribosomal protein S25 family protein%3B CONTAINS InterPro DOMAIN/s: Ribosomal protein S25 (InterPro:IPR004977)%3B BEST Arabidopsis thaliana protein match is: Ribosomal protein S25 family protein (TAIR:AT4G39200.1)%3B Has 30201 Blast hits to 17322 proteins in 780 species: Archae - 12%3B Bacteria - 1396%…	GO:0003735,GO:0005737,GO:0022627,GO:0005886
dubium	male-biased	OG0005225	AT3G50060	ID=AT3G50060;Name=AT3G50060;Note=myb domain protein 77;curator_summary=Encodes a member of the R2R3 transcription factor gene family. Expressed in response to potassium deprivation and auxin. Involved in lateral root development. Interacts with ARF7 and regulates the expression of some auxin responsive genes.;symbol=MYB77;full_name=myb domain protein 77;computational_description=myb domain protei…	GO:0010929,GO:0009751,GO:0010200,GO:0044212,GO:0003700,GO:0005634,GO:0043565,GO:0009723,GO:0006355,GO:0005515,GO:0048527
dubium	male-biased	OG0005694	AT4G08150	ID=AT4G08150;Name=AT4G08150;Note=homeobox knotted-like protein;curator_summary=A member of class I knotted1-like homeobox gene family (together with KNAT2). Similar to the knotted1 (kn1) homeobox gene of maize. Normally expressed in the peripheral and rib zone of shoot apical meristem but not in the leaf primordia. It is also expressed in the fourth floral whorl%2C in the region that would become…	GO:0043565,GO:0045165,GO:0010051,GO:0010089,GO:0003700,GO:0005634,GO:0006355,GO:0005515,GO:0001708
dubium	male-biased	OG0005806	AT2G18950	ID=AT2G18950;Name=AT2G18950;Note=homogentisate phytyltransferase 1;curator_summary=Encodes homogentisate phytyltransferase involved in tocopherol biosynthesis. Has impact on seed longevity and plays a role in the adaptation to low temperature stress%2C notably phloem loading.;symbol=HPT1;Alias=ATHPT,HOMOGENTISATE PHYTYLTRANSFERASE,TPT1,VTE2,VITAMIN E 2;full_name=homogentisate phytyltransferase 1;…	GO:0031969,GO:0006636,GO:0004659,GO:0016021,GO:0042362,GO:0009915,GO:0071555,GO:0009266,GO:0009507,GO:0010176,GO:0031347,GO:0010189
dubium	male-biased	OG0006061	AT1G05260	ID=AT1G05260;Name=AT1G05260;Note=Peroxidase superfamily protein;curator_summary=Encodes a cold-inducible cationic peroxidase that is involved in the stress response. In response to low temperature%2C RCI3 transcripts accumulate in the aerial part and in roots of etiolated seedlings but only in roots of light-grown seedlings.;symbol=RCI3;Alias=RCI3A;full_name=RARE COLD INDUCIBLE GENE 3;computation…	GO:0042538,GO:0005783,GO:0020037,GO:0009505,GO:0009409,GO:0006950,GO:0042744,GO:0009506,GO:0006979,GO:0009269,GO:0046872,GO:0004601,GO:0055114,GO:0005576
dubium	male-biased	OG0006105	AT5G07050	ID=AT5G07050;Name=AT5G07050;Note=nodulin MtN21 /EamA-like transporter family protein;curator_summary=nodulin MtN21-like transporter family protein;symbol=UMAMIT9;full_name=Usually multiple acids move in and out Transporters 9;computational_description=nodulin MtN21 /EamA-like transporter family protein%3B LOCATED IN: membrane%3B CONTAINS InterPro DOMAIN/s: Protein of unknown function DUF6%2C tran…	GO:0022857,GO:0009507,GO:0016021,GO:0005886
dubium	male-biased	OG0006648	AT5G22930	ID=AT5G22930;Name=AT5G22930;Note=enabled-like protein (DUF1635);computational_description=Protein of unknown function (DUF1635)%3B CONTAINS InterPro DOMAIN/s: Protein of unknown function DUF1635 (InterPro:IPR012862)%3B BEST Arabidopsis thaliana protein match is: Protein of unknown function (DUF1635) (TAIR:AT3G44940.1)%3B Has 97 Blast hits to 97 proteins in 15 species: Archae - 0%3B Bacteria - 0%3…	GO:0003674,GO:0005634,GO:0008150
dubium	male-biased	OG0007270	AT1G79380	ID=AT1G79380;Name=AT1G79380;Note=Ca(2)-dependent phospholipid-binding protein (Copine) family;curator_summary=Encodes a ubiquitin ligase that is an essential upstream modulator of JA signaling in response to various stimuli.;symbol=RGLG4;full_name=RING DOMAIN LIGASE 4;computational_description=Ca(2)-dependent phospholipid-binding protein (Copine) family%3B FUNCTIONS IN: zinc ion binding%3B EXPRES…	GO:0005737,GO:0005634,GO:0009867,GO:0009611,GO:0005739,GO:0042742,GO:0005515,GO:0046872,GO:0004842
dubium	male-biased	OG0007345	AT2G01990	ID=AT2G01990;Name=AT2G01990;Note=XRI1-like protein;computational_description=unknown protein%3B BEST Arabidopsis thaliana protein match is: unknown protein (TAIR:AT1G14630.1)%3B Has 118 Blast hits to 118 proteins in 14 species: Archae - 0%3B Bacteria - 0%3B Metazoa - 0%3B Fungi - 0%3B Plants - 118%3B Viruses - 0%3B Other Eukaryotes - 0 (source: NCBI BLink).;Dbxref=PMID:20736450,locus:2041110;locu…	GO:0003674,GO:0005634,GO:0008150
dubium	male-biased	OG0007602	AT2G15630	ID=AT2G15630;Name=AT2G15630;Note=Pentatricopeptide repeat (PPR) superfamily protein;computational_description=Pentatricopeptide repeat (PPR) superfamily protein%3B CONTAINS InterPro DOMAIN/s: Pentatricopeptide repeat (InterPro:IPR002885)%3B BEST Arabidopsis thaliana protein match is: Tetratricopeptide repeat (TPR)-like superfamily protein (TAIR:AT5G01110.1)%3B Has 56384 Blast hits to 14280 protei…	GO:0003674,GO:0008150,GO:0005739
dubium	male-biased	OG0007666	AT3G48970	ID=AT3G48970;Name=AT3G48970;Note=Heavy metal transport/detoxification superfamily protein;computational_description=Heavy metal transport/detoxification superfamily protein %3B FUNCTIONS IN: copper ion binding%2C metal ion binding%3B INVOLVED IN: copper ion transport%2C metal ion transport%3B EXPRESSED IN: 16 plant structures%3B EXPRESSED DURING: 9 growth stages%3B CONTAINS InterPro DOMAIN/s: Hea…	GO:0005794,GO:0046872,GO:0030001
dubium	male-biased	OG0007817	AT2G39980	ID=AT2G39980;Name=AT2G39980;Note=HXXXD-type acyl-transferase family protein;computational_description=HXXXD-type acyl-transferase family protein%3B FUNCTIONS IN: transferase activity%2C transferring acyl groups other than amino-acyl groups%2C transferase activity%3B INVOLVED IN: response to karrikin%3B LOCATED IN: cellular_component unknown%3B EXPRESSED IN: 17 plant structures%3B EXPRESSED DURING…	GO:0005737,GO:0016747,GO:0080167
dubium	male-biased	OG0008154
dubium	male-biased	OG0008621	AT5G08260	ID=AT5G08260;Name=AT5G08260;Note=serine carboxypeptidase-like 35;symbol=scpl35;full_name=serine carboxypeptidase-like 35;computational_description=serine carboxypeptidase-like 35 (scpl35)%3B FUNCTIONS IN: serine-type carboxypeptidase activity%3B INVOLVED IN: proteolysis%3B LOCATED IN: endomembrane system%3B EXPRESSED IN: 22 plant structures%3B EXPRESSED DURING: 13 growth stages%3B CONTAINS InterP…	GO:0005773,GO:0051603,GO:0005576,GO:0004185
dubium	male-biased	OG0008641	AT5G17050	ID=AT5G17050;Name=AT5G17050;Note=UDP-glucosyl transferase 78D2;curator_summary=The At5g17050 encodes a anthocyanidin 3-O-glucosyltransferase which specifically glucosylates the 3-position of the flavonoid C-ring. Anthocyanidins such as cyanidin and pelargonidin as well as flavonols such as kaempferol and quercetin are accepted substrates.;symbol=UGT78D2;full_name=UDP-glucosyl transferase 78D2;com…	GO:0102425,GO:0043231,GO:0008194,GO:0035251,GO:0047893,GO:0102360,GO:0080043,GO:0080167,GO:0016757,GO:0009698,GO:0047213,GO:0009507
dubium	male-biased	OG0009179
dubium	male-biased	OG0009224	AT5G66390	ID=AT5G66390;Name=AT5G66390;Note=Peroxidase superfamily protein;curator_summary=Encodes a peroxidase that is involved in lignin biosynthesis.;Alias=PRX72,PEROXIDASE 72;computational_description=Peroxidase superfamily protein%3B FUNCTIONS IN: peroxidase activity%2C heme binding%3B INVOLVED IN: response to oxidative stress%2C oxidation reduction%3B LOCATED IN: endomembrane system%3B EXPRESSED IN: l…	GO:0009809,GO:0020037,GO:0006979,GO:0042744,GO:0046872,GO:0004601,GO:0055114,GO:0005576
dubium	male-biased	OG0009316	AT5G49830	ID=AT5G49830;Name=AT5G49830;Note=exocyst complex component 84B;curator_summary=Encodes a member of the exocyst complex gene family. The exocyst is a protein complex involved in tethering vesicles to the plasma membrane during regulated or polarized secretion.;symbol=EXO84B;full_name=exocyst complex component 84B;computational_description=exocyst complex component 84B (EXO84B)%3B LOCATED IN: cytos…	GO:0006893,GO:0005737,GO:0009524,GO:0009536,GO:0000145,GO:0005618,GO:0005829,GO:0005856,GO:0060321,GO:0008104,GO:0006887,GO:0005515,GO:0005886,GO:0048471,GO:0005576
dubium	male-biased	OG0009753	AT3G08860	ID=AT3G08860;Name=AT3G08860;Note=PYRIMIDINE 4;curator_summary=Encodes a protein that is predicted to have beta-alanine aminotransferase activity.;symbol=PYD4;full_name=PYRIMIDINE 4;computational_description=PYRIMIDINE 4 (PYD4)%3B FUNCTIONS IN: pyridoxal phosphate binding%2C transaminase activity%2C catalytic activity%2C alanine-glyoxylate transaminase activity%3B INVOLVED IN: cellular response to…	GO:0008453,GO:0043562,GO:0005739,GO:0009853,GO:0030170,GO:0009507
dubium	male-biased	OG0009936	AT4G22880	ID=AT4G22880;Name=AT4G22880;Note=leucoanthocyanidin dioxygenase;curator_summary=encodes leucoanthocyanidin dioxygenase%2C which is involved in proanthocyanin biosynthesis. Mutant analysis suggests that this gene is also involved in vacuole formation.;symbol=LDOX;Alias=ANS,ANTHOCYANIDIN SYNTHASE,TDS4,TANNIN DEFICIENT SEED 4,TT18;full_name=leucoanthocyanidin dioxygenase;computational_description=le…	GO:0005737,GO:0009718,GO:0009753,GO:0051213,GO:0031418,GO:0050589,GO:0009611,GO:0055114,GO:0046872,GO:0010023,GO:0007033
dubium	male-biased	OG0010046	AT3G10340	ID=AT3G10340;Name=AT3G10340;Note=phenylalanine ammonia-lyase 4;curator_summary=Encodes PAL4%2C a putative a phenylalanine ammonia-lyase. Arabidopsis has four PALs: AT2G37040 (PAL1)%2C AT3G53260 (PAL2)%2C AT5G04230 (PAL3) and AT3G10340 (PAL4).;symbol=PAL4;full_name=phenylalanine ammonia-lyase 4;computational_description=phenylalanine ammonia-lyase 4 (PAL4)%3B FUNCTIONS IN: ammonia-lyase activity%2…	GO:0005737,GO:0016841,GO:0006559,GO:0009800,GO:0045548,GO:0005515
dubium	male-biased	OG0010088	AT1G31490	ID=AT1G31490;Name=AT1G31490;Note=HXXXD-type acyl-transferase family protein;computational_description=HXXXD-type acyl-transferase family protein%3B FUNCTIONS IN: transferase activity%2C transferring acyl groups other than amino-acyl groups%2C quinone binding%2C primary amine oxidase activity%2C copper ion binding%2C transferase activity%3B INVOLVED IN: oxidation reduction%2C amine metabolic proce…	GO:0005737,GO:0048038,GO:0009308,GO:0008131,GO:0016747,GO:0005507,GO:0055114
dubium	male-biased	OG0010100	AT3G49010	ID=AT3G49010;Name=AT3G49010;Note=breast basic conserved 1;curator_summary=Encodes 60S ribosomal protein L13. Homolog of human breast basic conserved 1 (BBC1).;symbol=BBC1;Alias=ATBBC1,breast basic conserved 1,RSU2,40S RIBOSOMAL PROTEIN;full_name=breast basic conserved 1;computational_description=breast basic conserved 1 (BBC1)%3B FUNCTIONS IN: structural constituent of ribosome%3B INVOLVED IN: tr…	GO:0005737,GO:0022626,GO:0005840,GO:0005730,GO:0005618,GO:0005829,GO:0022625,GO:0005774,GO:0003735,GO:0003723,GO:0005886,GO:0006412,GO:0009506,GO:0003729
dubium	male-biased	OG0010193	AT5G49330	ID=AT5G49330;Name=AT5G49330;Note=myb domain protein 111;curator_summary=Member of the R2R3 factor gene family.;symbol=MYB111;Alias=ATMYB111,ARABIDOPSIS MYB DOMAIN PROTEIN 111,PFG3,PRODUCTION OF FLAVONOL GLYCOSIDES 3;full_name=myb domain protein 111;computational_description=myb domain protein 111 (MYB111)%3B CONTAINS InterPro DOMAIN/s: SANT%2C DNA-binding (InterPro:IPR001005)%2C Homeodomain-like …	GO:0043565,GO:0051555,GO:1900386,GO:0044212,GO:0003700,GO:0005634,GO:0030154,GO:0009416,GO:0010224
dubium	male-biased	OG0010223	AT1G28400	ID=AT1G28400;Name=AT1G28400;Note=GATA zinc finger protein;computational_description=unknown protein%3B FUNCTIONS IN: molecular_function unknown%3B INVOLVED IN: biological_process unknown%3B LOCATED IN: endomembrane system%3B EXPRESSED IN: 22 plant structures%3B EXPRESSED DURING: 13 growth stages%3B BEST Arabidopsis thaliana protein match is: unknown protein (TAIR:AT2G33850.1)%3B Has 45374 Blast h…	GO:0008150,GO:0003674
dubium	male-biased	OG0010467	AT2G07560	ID=AT2G07560;Name=AT2G07560;Note=H[+]-ATPase 6;symbol=HA6;Alias=AHA6,H(+)-ATPase 6;full_name=H(+)-ATPase 6;computational_description=H(+)-ATPase 6 (HA6)%3B FUNCTIONS IN: protein binding%2C ATPase activity%3B INVOLVED IN: cation transport%2C metabolic process%2C ATP biosynthetic process%3B LOCATED IN: plasma membrane%2C membrane%3B EXPRESSED IN: 11 plant structures%3B EXPRESSED DURING: L mature po…	GO:0046872,GO:0005515,GO:1902600,GO:0016021,GO:0120029,GO:0016887,GO:0005886,GO:0051453,GO:0008553,GO:0005524
dubium	male-biased	OG0010468
dubium	male-biased	OG0010535	AT3G53400	ID=AT3G53400;Name=AT3G53400;Note=peptide upstream protein;computational_description=BEST Arabidopsis thaliana protein match is: conserved peptide upstream open reading frame 47 (TAIR:AT5G03190.1)%3B Has 285 Blast hits to 285 proteins in 23 species: Archae - 0%3B Bacteria - 0%3B Metazoa - 1%3B Fungi - 0%3B Plants - 279%3B Viruses - 0%3B Other Eukaryotes - 5 (source: NCBI BLink).;Dbxref=PMID:129490…	GO:0008168,GO:0016021,GO:0005576
dubium	male-biased	OG0010722	AT4G14740	ID=AT4G14740;Name=AT4G14740;Note=auxin canalization protein (DUF828);computational_description=FUNCTIONS IN: phosphoinositide binding%3B INVOLVED IN: signal transduction%3B EXPRESSED IN: cultured cell%3B CONTAINS InterPro DOMAIN/s: Pleckstrin-like%2C plant (InterPro:IPR013666)%2C Protein of unknown function DUF828 (InterPro:IPR008546)%3B BEST Arabidopsis thaliana protein match is: Plant protein o…	GO:0006892,GO:0009734,GO:0035091,GO:0010305,GO:0005634,GO:0005802,GO:0010087,GO:0007165,GO:0016021,GO:0009507
dubium	male-biased	OG0010810	AT3G03430	ID=AT3G03430;Name=AT3G03430;Note=Calcium-binding EF-hand family protein;computational_description=Calcium-binding EF-hand family protein%3B FUNCTIONS IN: calcium ion binding%3B INVOLVED IN: biological_process unknown%3B LOCATED IN: cytoplasm%3B EXPRESSED IN: 9 plant structures%3B EXPRESSED DURING: L mature pollen stage%2C M germinated pollen stage%2C 4 anthesis%2C C globular stage%2C petal differ…	GO:0005737,GO:0008150,GO:0005509,GO:0005739
dubium	male-biased	OG0010864	AT3G13080	ID=AT3G13080;Name=AT3G13080;Note=multidrug resistance-associated protein 3;curator_summary=encodes an ATP-dependent MRP-like ABC transporter able to transport glutathione-conjugates as well as chlorophyll catabolites. The expression of this gene is upregulated by herbicide safeners such as benoxacor and fenclorim.;symbol=ABCC3;Alias=ATMRP3,multidrug resistance-associated protein 3,MRP3,MULTIDRUG …	GO:0000325,GO:0015431,GO:0005773,GO:0016021,GO:0016020,GO:0042626,GO:0010290,GO:0005774,GO:0048046,GO:0008559,GO:0005524,GO:0016887,GO:0055085,GO:0009506,GO:0009507
dubium	male-biased	OG0010888	AT1G13130	ID=AT1G13130;Name=AT1G13130;Note=Cellulase (glycosyl hydrolase family 5) protein;computational_description=Cellulase (glycosyl hydrolase family 5) protein%3B FUNCTIONS IN: cation binding%2C hydrolase activity%2C hydrolyzing O-glycosyl compounds%2C catalytic activity%3B INVOLVED IN: carbohydrate metabolic process%3B LOCATED IN: endomembrane system%3B EXPRESSED IN: 8 plant structures%3B EXPRESSED D…	GO:0009507,GO:0005975,GO:0004553
dubium	male-biased	OG0010992	AT1G21360	ID=AT1G21360;Name=AT1G21360;Note=glycolipid transfer protein 2;symbol=GLTP2;full_name=glycolipid transfer protein 2;computational_description=glycolipid transfer protein 2 (GLTP2)%3B FUNCTIONS IN: glycolipid transporter activity%2C glycolipid binding%3B INVOLVED IN: glycolipid transport%3B LOCATED IN: cytoplasm%3B CONTAINS InterPro DOMAIN/s: Glycolipid transfer protein%2C GLTP (InterPro:IPR014830…	GO:0005737,GO:0035627,GO:1902387,GO:0016020,GO:0008289,GO:0005829,GO:0120009,GO:1902388
dubium	male-biased	OG0011075	AT4G08850	ID=AT4G08850;Name=AT4G08850;Note=Leucine-rich repeat receptor-like protein kinase family protein;computational_description=Leucine-rich repeat receptor-like protein kinase family protein%3B FUNCTIONS IN: kinase activity%3B INVOLVED IN: protein amino acid phosphorylation%3B LOCATED IN: plasma membrane%2C membrane%3B EXPRESSED IN: 23 plant structures%3B EXPRESSED DURING: 13 growth stages%3B CONTAIN…	GO:0009755,GO:0006468,GO:0016021,GO:0016301,GO:0004674,GO:0010183,GO:0005515,GO:0005886,GO:0009506,GO:0090406,GO:0005524
dubium	male-biased	OG0011083	AT1G07670	ID=AT1G07670;Name=AT1G07670;Note=endomembrane-type CA-ATPase 4;symbol=ECA4;Alias=ATECA4;full_name=endomembrane-type CA-ATPase 4;computational_description=endomembrane-type CA-ATPase 4 (ECA4)%3B FUNCTIONS IN: calcium-transporting ATPase activity%3B INVOLVED IN: cation transport%2C calcium ion transport%2C metabolic process%2C ATP biosynthetic process%3B LOCATED IN: endoplasmic reticulum%2C plasma …	GO:0008553,GO:0005783,GO:0006874,GO:0016021,GO:0070588,GO:0005576,GO:0005886,GO:0005388,GO:0046872,GO:0005634,GO:0005524
dubium	male-biased	OG0011131	AT2G18370	ID=AT2G18370;Name=AT2G18370;Note=Bifunctional inhibitor/lipid-transfer protein/seed storage 2S albumin superfamily protein;curator_summary=Predicted to encode a PR (pathogenesis-related) protein. Belongs to the lipid transfer protein (PR-14) family with the following members: At2g38540/LTP1%2C At2g38530/LTP2%2C At5g59320/LTP3%2C At5g59310/LTP4%2C At3g51600/LTP5%2C At3g08770/LTP6%2C At2g15050/LTP7…	GO:0016020,GO:0005576,GO:0008289,GO:0006869
dubium	male-biased	OG0011144	AT1G58230	ID=AT1G58230;Name=AT1G58230;Note=binding protein;Alias=BCHB,Beach-Domain Homolog B;computational_description=binding%3B FUNCTIONS IN: binding%3B INVOLVED IN: signal transduction%3B LOCATED IN: mitochondrion%3B EXPRESSED IN: 23 plant structures%3B EXPRESSED DURING: 13 growth stages%3B CONTAINS InterPro DOMAIN/s: WD40 repeat 2 (InterPro:IPR019782)%2C Beige/BEACH (InterPro:IPR000409)%2C WD40 repeat%…	GO:0005634,GO:0005739
dubium	male-biased	OG0011168	AT5G05960	ID=AT5G05960;Name=AT5G05960;Note=Bifunctional inhibitor/lipid-transfer protein/seed storage 2S albumin superfamily protein;computational_description=Bifunctional inhibitor/lipid-transfer protein/seed storage 2S albumin superfamily protein%3B FUNCTIONS IN: lipid binding%3B INVOLVED IN: lipid transport%3B LOCATED IN: endomembrane system%3B EXPRESSED IN: 18 plant structures%3B EXPRESSED DURING: 10 g…	GO:0005504,GO:0005576,GO:0009627
dubium	male-biased	OG0011588	AT5G13930	ID=AT5G13930;Name=AT5G13930;Note=Chalcone and stilbene synthase family protein;curator_summary=Encodes chalcone synthase (CHS)%2C a key enzyme involved in the biosynthesis of flavonoids. Required for the accumulation of purple anthocyanins in leaves and stems. Also involved in the regulation of auxin transport and the modulation of root gravitropism.;symbol=TT4;Alias=ATCHS,CHS,CHALCONE SYNTHASE;f…	GO:0009733,GO:0009629,GO:0009705,GO:0005783,GO:0009753,GO:0016210,GO:0005634,GO:0009715,GO:0009813,GO:0009611,GO:0009926,GO:0005515,GO:0010224,GO:0006979,GO:0005737,GO:0031540
dubium	male-biased	OG0011607	AT5G65660	ID=AT5G65660;Name=AT5G65660;Note=hydroxyproline-rich glycoprotein family protein;computational_description=hydroxyproline-rich glycoprotein family protein%3B FUNCTIONS IN: molecular_function unknown%3B INVOLVED IN: biological_process unknown%3B LOCATED IN: plasma membrane%3B EXPRESSED IN: 22 plant structures%3B EXPRESSED DURING: 13 growth stages%3B Has 30201 Blast hits to 17322 proteins in 780 sp…	GO:0003674,GO:0005634,GO:0008150,GO:0016021,GO:0005886
dubium	male-biased	OG0011650	AT2G38750	ID=AT2G38750;Name=AT2G38750;Note=annexin 4;curator_summary=Annexins are a family of calcium dependent membrane binding proteins though to be involved in Golgi mediated secretion. This is one of four annexins identified in Arabidopsis.;symbol=ANNAT4;Alias=AtANN4;full_name=annexin 4;computational_description=annexin 4 (ANNAT4)%3B FUNCTIONS IN: calcium-dependent phospholipid binding%2C calcium ion b…	GO:0005794,GO:0009737,GO:0009986,GO:0005544,GO:0006970,GO:0005509,GO:0009414,GO:0009408,GO:0009409,GO:0009651,GO:0009507,GO:0009506,GO:0003729
dubium	male-biased	OG0011857	AT2G32210	ID=AT2G32210;Name=AT2G32210;Note=cysteine-rich/transmembrane domain A-like protein;computational_description=unknown protein%3B BEST Arabidopsis thaliana protein match is: unknown protein (TAIR:AT2G32190.1)%3B Has 214 Blast hits to 214 proteins in 21 species: Archae - 0%3B Bacteria - 0%3B Metazoa - 1%3B Fungi - 10%3B Plants - 203%3B Viruses - 0%3B Other Eukaryotes - 0 (source: NCBI BLink).;Dbxref…	GO:0016021,GO:0005886,GO:0005515,GO:0071456
dubium	male-biased	OG0011925	AT2G42960	ID=AT2G42960;Name=AT2G42960;Note=Protein kinase superfamily protein;computational_description=Protein kinase superfamily protein%3B FUNCTIONS IN: protein serine/threonine kinase activity%2C protein kinase activity%2C kinase activity%2C ATP binding%3B INVOLVED IN: protein amino acid phosphorylation%3B LOCATED IN: cellular_component unknown%3B EXPRESSED IN: 10 plant structures%3B EXPRESSED DURING: …	GO:0005737,GO:0006468,GO:0016310,GO:0005829,GO:0004675,GO:0005886,GO:0016021,GO:0005524,GO:0009507
dubium	male-biased	OG0012246
dubium	male-biased	OG0012518	AT5G52220	ID=AT5G52220;Name=AT5G52220;Note=chromosome transmission fidelity-like protein;computational_description=CONTAINS InterPro DOMAIN/s: Chromosome transmission fidelity protein 8 (InterPro:IPR018607)%3B Has 127 Blast hits to 127 proteins in 63 species: Archae - 0%3B Bacteria - 0%3B Metazoa - 70%3B Fungi - 17%3B Plants - 31%3B Viruses - 0%3B Other Eukaryotes - 9 (source: NCBI BLink).;Dbxref=PMID:1554…	GO:0005634,GO:0005515
dubium	male-biased	OG0012588	AT4G02660	ID=AT4G02660;Name=AT4G02660;Note=Beige/BEACH and WD40 domain-containing protein;Alias=BCHA2,Beach-Domain Homolog A2;computational_description=Beige/BEACH domain %3BWD domain%2C G-beta repeat protein%3B FUNCTIONS IN: binding%3B INVOLVED IN: signal transduction%3B LOCATED IN: chloroplast%3B EXPRESSED IN: 10 plant structures%3B EXPRESSED DURING: 6 growth stages%3B CONTAINS InterPro DOMAIN/s: WD40 re…	GO:0005634,GO:0009507
dubium	male-biased	OG0012665	AT1G26850	ID=AT1G26850;Name=AT1G26850;Note=S-adenosyl-L-methionine-dependent methyltransferases superfamily protein;computational_description=S-adenosyl-L-methionine-dependent methyltransferases superfamily protein%3B LOCATED IN: Golgi apparatus%2C membrane%3B EXPRESSED IN: 25 plant structures%3B EXPRESSED DURING: 15 growth stages%3B CONTAINS InterPro DOMAIN/s: Protein of unknown function DUF248%2C methylt…	GO:0005737,GO:0005794,GO:0005797,GO:0016021,GO:0005802,GO:0000139,GO:0008168,GO:0032259,GO:0005768,GO:0005634
dubium	male-biased	OG0012813
dubium	male-biased	OG0013336	AT1G08250	ID=AT1G08250;Name=AT1G08250;Note=arogenate dehydratase 6;curator_summary=Encodes a plastid-localized arogenate dehydratase involved in phenylalanine biosynthesis. Although this enzyme has sequence similarity to prephenate dehydratases%2C it is 98 times more active with arogenate than prephenate in enzymatic assays.;symbol=ADT6;Alias=AtADT6,Arabidopsis thaliana arogenate dehydratase 6;full_name=ar…	GO:0005737,GO:0009570,GO:0004664,GO:0009094,GO:0047769,GO:0009507
dubium	male-biased	OG0013395	AT3G56100	ID=AT3G56100;Name=AT3G56100;Note=meristematic receptor-like kinase;curator_summary=Protein kinase expressed in meristematic cells. Phosphorylates AGL24.;symbol=MRLK;Alias=IMK3;full_name=meristematic receptor-like kinase;computational_description=meristematic receptor-like kinase (MRLK)%3B FUNCTIONS IN: protein serine/threonine kinase activity%2C protein kinase activity%2C ATP binding%3B INVOLVED …	GO:0005886,GO:0016020,GO:0009507,GO:0004672
dubium	male-biased	OG0013474	AT5G12030	ID=AT5G12030;Name=AT5G12030;Note=heat shock protein 17.6A;curator_summary=Encodes a cytosolic small heat shock protein with chaperone activity that is induced by heat and osmotic stress and is also expressed late in seed development.;symbol=HSP17.6A;Alias=AT-HSP17.6A,heat shock protein 17.6A,HSP17.6,HEAT SHOCK PROTEIN 17.6;full_name=heat shock protein 17.6A;computational_description=heat shock pr…	GO:0051259,GO:0005737,GO:0009408,GO:0006457,GO:0005829,GO:0051082,GO:0000302,GO:0006972,GO:0071456,GO:0009651,GO:0043621
dubium	male-biased	OG0013479	AT4G31590	ID=AT4G31590;Name=AT4G31590;Note=Cellulose-synthase-like C5;curator_summary=encodes a gene similar to cellulose synthase;symbol=CSLC5;Alias=ATCSLC05,CELLULOSE-SYNTHASE LIKE C5,ATCSLC5,Cellulose-synthase-like C5,CSLC05,CELLULOSE-SYNTHASE LIKE C5;full_name=Cellulose-synthase-like C5;computational_description=Cellulose-synthase-like C5 (CSLC5)%3B FUNCTIONS IN: cellulose synthase activity%2C transfer…	GO:0005794,GO:0005634,GO:0000139,GO:0071555,GO:0016757,GO:0016759,GO:0016021
dubium	male-biased	OG0013523	AT3G51240	ID=AT3G51240;Name=AT3G51240;Note=flavanone 3-hydroxylase;curator_summary=Encodes flavanone 3-hydroxylase that is coordinately expressed with chalcone synthase and chalcone isomerases. Regulates flavonoid biosynthesis. Not responsive to auxin or ethylene stimulus (qRT-PCR).;symbol=F3H;Alias=F3'H,TT6,TRANSPARENT TESTA 6;full_name=flavanone 3-hydroxylase;computational_description=flavanone 3-hydroxy…	GO:0005737,GO:0031418,GO:0046872,GO:0051213,GO:0009813,GO:0055114,GO:0010224,GO:0005524,GO:0045486
dubium	male-biased	OG0013526
dubium	male-biased	OG0013813	AT1G55790	ID=AT1G55790;Name=AT1G55790;Note=ferredoxin-fold anticodon-binding domain protein;computational_description=FUNCTIONS IN: metal ion binding%3B INVOLVED IN: metal ion transport%3B CONTAINS InterPro DOMAIN/s: Heavy metal transport/detoxification protein (InterPro:IPR006121)%2C Domain of unknown function DUF2431 (InterPro:IPR019446)%3B BEST Arabidopsis thaliana protein match is: Domain of unknown fu…	GO:0005737,GO:0070475,GO:0005634,GO:0070042
dubium	male-biased	OG0014210	AT2G36060	ID=AT2G36060;Name=AT2G36060;Note=MMS ZWEI homologue 3;curator_summary=MMZ3/UEV1C encodes a protein that may play a role in DNA damage responses and error-free post-replicative DNA repair by participating in lysine-63-based polyubiquitination reactions. UEV1C can form diubiquitin and triubiquitin chains in combination with UBC13A/UBC35 in vitro. It can also functionally complement an mms2 mutation…	GO:0005783,GO:0006301,GO:0005829,GO:0061631,GO:0005515,GO:0005634,GO:0004842,GO:0070534,GO:0031372
dubium	male-biased	OG0014281	AT2G39750	ID=AT2G39750;Name=AT2G39750;Note=S-adenosyl-L-methionine-dependent methyltransferases superfamily protein;computational_description=S-adenosyl-L-methionine-dependent methyltransferases superfamily protein%3B CONTAINS InterPro DOMAIN/s: Protein of unknown function DUF248%2C methyltransferase putative (InterPro:IPR004159)%3B BEST Arabidopsis thaliana protein match is: Putative methyltransferase fam…	GO:0005737,GO:0005794,GO:0005634,GO:0005802,GO:0000139,GO:0008168,GO:0032259,GO:0005768,GO:0016021
dubium	male-biased	OG0015346
dubium	male-biased	OG0015735	AT3G57420	ID=AT3G57420;Name=AT3G57420;Note=transmembrane protein%2C putative (DUF288);computational_description=Protein of unknown function (DUF288)%3B FUNCTIONS IN: molecular_function unknown%3B INVOLVED IN: biological_process unknown%3B LOCATED IN: cell wall%3B EXPRESSED IN: 22 plant structures%3B EXPRESSED DURING: 13 growth stages%3B CONTAINS InterPro DOMAIN/s: Protein of unknown function DUF288 (InterP…	GO:0052324,GO:0005794,GO:0016757,GO:0005618,GO:0010330,GO:0005634,GO:0000139,GO:0005515,GO:2001009,GO:0016021,GO:0042802
dubium	male-biased	OG0015739	AT2G24590	ID=AT2G24590;Name=AT2G24590;Note=RNA recognition motif and CCHC-type zinc finger domains containing protein;curator_summary=Barta et al (2010) have proposed a nomenclature for Serine/Arginine-Rich Protein Splicing Factors (SR proteins): Plant Cell. 2010%2C 22:2926.;symbol=RSZ22a;Alias=At-RSZ22a,RS-containing zinc finger protein 22a;full_name=RS-containing zinc finger protein 22a;computational_des…	GO:0016607,GO:0000381,GO:0005829,GO:0005730,GO:0005773,GO:0045292,GO:0008380,GO:0003723,GO:0005634,GO:0005681,GO:0008270
dubium	male-biased	OG0015783	AT2G02820	ID=AT2G02820;Name=AT2G02820;Note=myb domain protein 88;curator_summary=Encodes a putative transcription factor (MYB88)%2C involved in stomata development%2C double loss of MYB88 and FLP (MYB124) activity results in a failure of guard mother cells (GMCs) to adopt the guard cell fate%2C thus they continue to divide resulting in abnormal stomata consisting of clusters of numerous guard cell-like cel…	GO:0009553,GO:0003700,GO:0005634,GO:0010052
dubium	male-biased	OG0016041
dubium	male-biased	OG0016057	AT4G18240	ID=AT4G18240;Name=AT4G18240;Note=starch synthase 4;symbol=SS4;Alias=ATSS4,ARABIDOPSIS THALIANA STARCH SYNTHASE 4,SSIV,STARCH SYNTHASE 4;full_name=starch synthase 4;computational_description=starch synthase 4 (SS4)%3B FUNCTIONS IN: transferase activity%2C transferring glycosyl groups%3B INVOLVED IN: starch metabolic process%3B LOCATED IN: chloroplast%3B EXPRESSED IN: 24 plant structures%3B EXPRESS…	GO:0033201,GO:0016757,GO:0005982,GO:0004373,GO:0005515,GO:0009011,GO:0009501,GO:0019252,GO:0009507
dubium	male-biased	OG0018904	AT4G29920	ID=AT4G29920;Name=AT4G29920;Note=Double Clp-N motif-containing P-loop nucleoside triphosphate hydrolases superfamily protein;curator_summary=Encodes a member of an eight-gene family (SMAX1 and SMAX1-like) that has weak similarity to AtHSP101%2C a ClpB chaperonin required for thermotolerance.;Alias=SMXL4,SMAX1-like 4;computational_description=Double Clp-N motif-containing P-loop nucleoside triphos…	GO:0005737,GO:0016787,GO:0019538,GO:0005634,GO:0033500,GO:0009651,GO:0042631,GO:0010233
dubium	male-biased	OG0019023	AT3G01060	ID=AT3G01060;Name=AT3G01060;Note=lysine-tRNA ligase;computational_description=unknown protein%3B Has 640 Blast hits to 638 proteins in 201 species: Archae - 0%3B Bacteria - 293%3B Metazoa - 0%3B Fungi - 71%3B Plants - 72%3B Viruses - 0%3B Other Eukaryotes - 204 (source: NCBI BLink).;Dbxref=PMID:14576160,PMID:18315867,PMID:21499259,locus:2102162;locus_type=protein_coding	GO:0007623,GO:0016874,GO:0009507
dubium	male-biased	OG0019063	AT4G37550	ID=AT4G37550;Name=AT4G37550;Note=Acetamidase/Formamidase family protein;computational_description=Acetamidase/Formamidase family protein%3B FUNCTIONS IN: formamidase activity%2C hydrolase activity%2C acting on carbon-nitrogen (but not peptide) bonds%2C in linear amides%3B INVOLVED IN: metabolic process%3B LOCATED IN: vacuole%3B EXPRESSED IN: 23 plant structures%3B EXPRESSED DURING: 13 growth stag…	GO:0004328,GO:0005773,GO:0005829,GO:0016811,GO:0005886,GO:0009507
dubium	male-biased	OG0019080	AT1G36060	ID=AT1G36060;Name=AT1G36060;Note=Integrase-type DNA-binding superfamily protein;curator_summary=encodes a member of the DREB subfamily A-6 of ERF/AP2 transcription factor family. The protein contains one AP2 domain. There are 8 members in this subfamily including RAP2.4.Overexpression results in increased drought tolerance and vitrified leaves. Binds to DRE/GCC promoter elements and activates exp…	GO:0009415,GO:0043565,GO:0044212,GO:0003700,GO:0005634,GO:0009873,GO:0006355,GO:0003677
dubium	male-biased	OG0019329	AT5G14370	ID=AT5G14370;Name=AT5G14370;Note=CCT motif family protein;computational_description=CCT motif family protein%3B LOCATED IN: chloroplast%3B EXPRESSED IN: 21 plant structures%3B EXPRESSED DURING: 13 growth stages%3B CONTAINS InterPro DOMAIN/s: CCT domain (InterPro:IPR010402)%3B BEST Arabidopsis thaliana protein match is: CCT motif family protein (TAIR:AT4G25990.1)%3B Has 30201 Blast hits to 17322 p…	GO:0006355,GO:0005634
dubium	male-biased	OG0019332	AT1G51680	ID=AT1G51680;Name=AT1G51680;Note=4-coumarate:CoA ligase 1;curator_summary=encodes an isoform of 4-coumarate:CoA ligase (4CL)%2C which is involved in the last step of the general phenylpropanoid pathway. In addition to 4-coumarate%2C it also converts ferulate. The catalytic efficiency was in the following (descending) order: p-coumaric acid%2C ferulic acid%2C caffeic acid and 5-OH-ferulic acid. At…	GO:0005737,GO:0016207,GO:0009620,GO:0009611,GO:0009411,GO:0009698,GO:0005524,GO:0009507
dubium	male-biased	OG0019374	AT2G36570	ID=AT2G36570;Name=AT2G36570;Note=Leucine-rich repeat protein kinase family protein;Alias=PXC1,PXY/TDR-correlated 1;computational_description=Leucine-rich repeat protein kinase family protein%3B FUNCTIONS IN: protein serine/threonine kinase activity%2C kinase activity%2C ATP binding%3B INVOLVED IN: transmembrane receptor protein tyrosine kinase signaling pathway%2C protein amino acid phosphorylati…	GO:0006468,GO:0009834,GO:0016021,GO:0016301,GO:0005886,GO:0004672,GO:0005524
dubium	male-biased	OG0019534	AT1G13950	ID=AT1G13950;Name=AT1G13950;Note=eukaryotic elongation factor 5A-1;curator_summary=Encodes eukaryotic translation initiation factor 5A (EIF-5A).In mammalian cells it functions as a shuttle protein that translocates mRNA from the nucleus to cytoplasmic ribosomes. Overexpression results in an increase in both primary and secondary xylem formation. In RNAi suppressed lines%2C xylem formation is redu…	GO:0005737,GO:0045905,GO:0045901,GO:0010089,GO:0006452,GO:0005576,GO:0003746,GO:0043022,GO:0006413,GO:0003743
dubium	male-biased	OG0019620	AT1G31480	ID=AT1G31480;Name=AT1G31480;Note=shoot gravitropism 2 (SGR2);curator_summary=encodes a novel protein that may be part of a gene family represented by bovine phosphatidic acid-preferring phospholipase A1 (PA-PLA1)containing a putative transmembrane domain. SGR2 is involved in the formation and function of the vacuole.;symbol=SGR2;full_name=SHOOT GRAVITROPISM 2;computational_description=SHOOT GRAVI…	GO:0005737,GO:0046872,GO:0009660,GO:0009590,GO:0005773,GO:0008970,GO:0009959,GO:0009705,GO:0004620,GO:0016042,GO:0009630,GO:0009506
dubium	male-biased	OG0019865	ATCG01110	ID=ATCG01110;Note=NAD(P)H dehydrogenase subunit H;Name=ATCG01110;curator_summary=Encodes the 49KDa plastid NAD(P)H dehydrogenase subunit H protein. Its transcription is regulated by an ndhF-specific plastid sigma factor%2C SIG4.;symbol=NDHH;full_name=NAD(P)H dehydrogenase subunit H;computational_description=NAD(P)H dehydrogenase subunit H (NDHH)%3B FUNCTIONS IN: NADPH dehydrogenase activity%3B IN…	GO:0009535,GO:0009534,GO:0051287,GO:0003959,GO:0009570,GO:0048038,GO:0009772,GO:0009507
dubium	female-biased	OG0000002	AT3G15353	ID=AT3G15353;Name=AT3G15353;Note=metallothionein 3;curator_summary=metallothionein%2C binds to and detoxifies excess copper and other metals%2C limiting oxidative damage;symbol=MT3;Alias=ATMT3;full_name=metallothionein 3;computational_description=metallothionein 3 (MT3)%3B Has 268 Blast hits to 268 proteins in 64 species: Archae - 0%3B Bacteria - 0%3B Metazoa - 0%3B Fungi - 0%3B Plants - 268%3B V…	GO:0005623,GO:0005507,GO:0008270,GO:0006878,GO:0005576
dubium	female-biased	OG0000018	AT3G47570	ID=AT3G47570;Name=AT3G47570;Note=Leucine-rich repeat protein kinase family protein;computational_description=Leucine-rich repeat protein kinase family protein%3B FUNCTIONS IN: protein serine/threonine kinase activity%2C kinase activity%2C ATP binding%3B INVOLVED IN: transmembrane receptor protein tyrosine kinase signaling pathway%2C protein amino acid phosphorylation%3B LOCATED IN: plasma membran…	GO:0006468,GO:0016021,GO:0016301,GO:0004674,GO:0005886,GO:0005524
dubium	female-biased	OG0000034	AT1G22380	ID=AT1G22380;Name=AT1G22380;Note=UDP-glucosyl transferase 85A3;curator_summary=Encodes a putative UDP-glucosyl transferase. At1g22380 was initially identified as encoding the protein AAF87154%2C which has been classified as a bHLH protein (AtbHLH152). Subsequently it has been found that the AAF87154 protein appears to be encoded by the AT1G23970 genomic locus.;symbol=UGT85A3;Alias=AtUGT85A3,UDP-g…	GO:0080044,GO:0043231,GO:0080043,GO:0016757,GO:0015020,GO:0008194
dubium	female-biased	OG0000082	ATCG00470	ID=ATCG00470;Note=ATP synthase epsilon chain;Name=ATCG00470;curator_summary=ATPase epsilon subunit;symbol=ATPE;full_name=ATP synthase epsilon chain;computational_description=ATP synthase epsilon chain (ATPE)%3B FUNCTIONS IN: hydrogen ion transporting ATP synthase activity%2C rotational mechanism%3B INVOLVED IN: cellular respiration%2C mitochondrial ATP synthesis coupled proton transport%3B LOCATE…	GO:0009535,GO:0009534,GO:0015986,GO:0046933,GO:0009941,GO:0045259,GO:0009536,GO:0045333,GO:0045261,GO:0042776,GO:0009579,GO:0009507
dubium	female-biased	OG0000115	AT1G67090	ID=AT1G67090;Name=AT1G67090;Note=ribulose bisphosphate carboxylase small chain 1A;curator_summary=Encodes a member of the Rubisco small subunit (RBCS) multigene family: RBCS1A (At1g67090)%2C RBCS1B (At5g38430)%2C RBCS2B (At5g38420)%2C and RBCS3B (At5g38410). Functions to yield sufficient Rubisco content for leaf photosynthetic capacity.;symbol=RBCS1A;full_name=ribulose bisphosphate carboxylase sm…	GO:0004497,GO:0022626,GO:0031977,GO:0048046,GO:0005739,GO:0015979,GO:0009535,GO:0009941,GO:0009570,GO:0009637,GO:0010218,GO:0005507,GO:0019253,GO:0110102,GO:0031969,GO:0009579,GO:0009409,GO:0010114,GO:0055114,GO:0009507,GO:0016984,GO:0009853
dubium	female-biased	OG0000147	AT1G22360	ID=AT1G22360;Name=AT1G22360;Note=UDP-glucosyl transferase 85A2;symbol=UGT85A2;Alias=AtUGT85A2,UDP-glucosyl transferase 85A2;full_name=UDP-glucosyl transferase 85A2;computational_description=UDP-glucosyl transferase 85A2 (UGT85A2)%3B FUNCTIONS IN: UDP-glycosyltransferase activity%2C transferase activity%2C transferring glycosyl groups%2C glucuronosyltransferase activity%3B INVOLVED IN: metabolic p…	GO:0080044,GO:0043231,GO:0005634,GO:0080043,GO:0016757,GO:0015020,GO:0008194
dubium	female-biased	OG0000155	AT2G47180	ID=AT2G47180;Name=AT2G47180;Note=galactinol synthase 1;curator_summary=GolS1 is a galactinol synthase that catalyzes the formation of galactinol from UDP-galactose and myo-inositol. GolS1 transcript levels rise in response to methyl viologen%2C an oxidative damage-inducing agent. Plants over-expressing GolS1 have increased tolerance to salt%2C chilling%2C and high-light stress.;symbol=GolS1;Alias…	GO:0005737,GO:0009737,GO:0047216,GO:0006012,GO:0009414,GO:0009651,GO:0009409,GO:0009408,GO:0046872,GO:0006979
dubium	female-biased	OG0000387	AT2G35120	ID=AT2G35120;Name=AT2G35120;Note=Single hybrid motif superfamily protein;computational_description=Single hybrid motif superfamily protein%3B FUNCTIONS IN: glycine dehydrogenase (decarboxylating) activity%2C ATP binding%3B INVOLVED IN: glycine catabolic process%2C glycine decarboxylation via glycine cleavage system%3B LOCATED IN: mitochondrion%2C glycine cleavage complex%3B EXPRESSED IN: 22 plant…	GO:0019464,GO:0005960,GO:0005739,GO:0005524
dubium	female-biased	OG0000585	AT3G23430	ID=AT3G23430;Name=AT3G23430;Note=phosphate 1;curator_summary=Encodes a protein with the mainly hydrophilic N-terminal and the C-terminal containing 6 potential membrane-spanning domains. The mutant is deficient in the transfer of phosphate from root epidermal and cortical cells to the xylem. Its expression is repressed by phosphate (Pi) in shoots%2C and transiently induced by phosphite (Phi) in r…	GO:0005737,GO:0005794,GO:0000822,GO:0005789,GO:0016021,GO:0005802,GO:0006817,GO:0015114,GO:0005739,GO:0000139,GO:0016036,GO:0005886,GO:0005622,GO:0006799,GO:0048016
dubium	female-biased	OG0000646	ATCG00480	ID=ATCG00480;Note=ATP synthase subunit beta;Name=ATCG00480;curator_summary=chloroplast-encoded gene for beta subunit of ATP synthase;symbol=PB;Alias=ATPB,ATP synthase subunit beta;full_name=ATP synthase subunit beta;computational_description=ATP synthase subunit beta (PB)%3B FUNCTIONS IN: hydrogen ion transmembrane transporter activity%2C zinc ion binding%3B INVOLVED IN: defense response to fungu…	GO:0009535,GO:0009534,GO:0015986,GO:0009507,GO:0009544,GO:0009817,GO:0010287,GO:0031977,GO:0015078,GO:0009570,GO:0005618,GO:0009536,GO:0005754,GO:0016887,GO:0045261,GO:0009409,GO:0009579,GO:0010319,GO:0008270
dubium	female-biased	OG0000761	AT2G45130	ID=AT2G45130;Name=AT2G45130;Note=SPX domain protein 3;curator_summary=Expression is upregulated in the shoot of cax1/cax3 mutant.;symbol=SPX3;Alias=ATSPX3,ARABIDOPSIS THALIANA SPX DOMAIN GENE 3;full_name=SPX domain gene 3;computational_description=SPX domain gene 3 (SPX3)%3B CONTAINS InterPro DOMAIN/s: SPX%2C N-terminal (InterPro:IPR004331)%3B BEST Arabidopsis thaliana protein match is: SPX domai…	GO:0005737,GO:0080040,GO:0016036
dubium	female-biased	OG0000809	AT3G51860	ID=AT3G51860;Name=AT3G51860;Note=cation exchanger 3;symbol=CAX3;Alias=ATCAX3,ATHCX1,CAX1-LIKE;full_name=cation exchanger 3;computational_description=cation exchanger 3 (CAX3)%3B CONTAINS InterPro DOMAIN/s: Sodium/calcium exchanger membrane region (InterPro:IPR004837)%2C Calcium/proton exchanger superfamily (InterPro:IPR004798)%2C Calcium/proton exchanger (InterPro:IPR004713)%3B BEST Arabidopsis t…	GO:0051592,GO:0006814,GO:0015491,GO:0005773,GO:0006874,GO:0016021,GO:0070588,GO:0009624,GO:0006882,GO:0005774,GO:0055062,GO:0030026,GO:0005739,GO:0005515,GO:0006793,GO:0015369,GO:0015368,GO:0009705,GO:0010351
dubium	female-biased	OG0000850	AT2G15480	ID=AT2G15480;Name=AT2G15480;Note=UDP-glucosyl transferase 73B5;symbol=UGT73B5;full_name=UDP-glucosyl transferase 73B5;computational_description=UDP-glucosyl transferase 73B5 (UGT73B5)%3B FUNCTIONS IN: quercetin 3-O-glucosyltransferase activity%2C UDP-glycosyltransferase activity%2C UDP-glucosyltransferase activity%2C transferase activity%2C transferring glycosyl groups%3B INVOLVED IN: response to…	GO:0102425,GO:0043231,GO:0008194,GO:0035251,GO:0047893,GO:0102360,GO:0006952,GO:0080043,GO:0016757,GO:0051707,GO:0009507
dubium	female-biased	OG0000859
dubium	female-biased	OG0000876	AT1G78140	ID=AT1G78140;Name=AT1G78140;Note=S-adenosyl-L-methionine-dependent methyltransferases superfamily protein;computational_description=S-adenosyl-L-methionine-dependent methyltransferases superfamily protein%3B FUNCTIONS IN: methyltransferase activity%3B INVOLVED IN: metabolic process%3B LOCATED IN: chloroplast%2C plastoglobule%3B EXPRESSED IN: 24 plant structures%3B EXPRESSED DURING: 15 growth stag…	GO:0008168,GO:0010287,GO:0032259,GO:0005739,GO:0009507
dubium	female-biased	OG0000990	AT5G04830	ID=AT5G04830;Name=AT5G04830;Note=Nuclear transport factor 2 (NTF2) family protein;computational_description=Nuclear transport factor 2 (NTF2) family protein%3B Has 30201 Blast hits to 17322 proteins in 780 species: Archae - 12%3B Bacteria - 1396%3B Metazoa - 17338%3B Fungi - 3422%3B Plants - 5037%3B Viruses - 0%3B Other Eukaryotes - 2996 (source: NCBI BLink).;Dbxref=PMID:17597079,PMID:18650403,PM…	GO:0003674,GO:0005634,GO:0008150,GO:0005886
dubium	female-biased	OG0001019	AT1G20020	ID=AT1G20020;Name=AT1G20020;Note=ferredoxin-NADP[+]-oxidoreductase 2;curator_summary=Encodes a leaf-type ferredoxin:NADP(H) oxidoreductase. It is present in both chloroplast stroma and thylakoid membranes but is more abundant in the stroma;symbol=FNR2;Alias=ATLFNR2,LEAF FNR 2,LFNR2,leaf-type chloroplast-targeted FNR 2;full_name=ferredoxin-NADP(+)-oxidoreductase 2;computational_description=ferredo…	GO:0009535,GO:0008266,GO:0009534,GO:0009570,GO:0005634,GO:0003959,GO:0004324,GO:0048046,GO:0042742,GO:0009817,GO:0009579,GO:0015979,GO:0055114,GO:0009507
dubium	female-biased	OG0001062	AT5G46800	ID=AT5G46800;Name=AT5G46800;Note=Mitochondrial substrate carrier family protein;curator_summary=Seedling lethal mutation%3B Mitochondrial Carnitine Acyl Carrier-Like Protein;symbol=BOU;full_name=A BOUT DE SOUFFLE;computational_description=A BOUT DE SOUFFLE (BOU)%3B FUNCTIONS IN: binding%2C transporter activity%3B INVOLVED IN: transport%2C mitochondrial transport%2C ornithine transport%3B LOCATED …	GO:0009536,GO:0000064,GO:0016021,GO:0005739,GO:0015822,GO:0005743,GO:0006839,GO:1990575,GO:0009507
dubium	female-biased	OG0001076	AT1G23110	ID=AT1G23110;Name=AT1G23110;Note=fold protein;computational_description=unknown protein%3B FUNCTIONS IN: molecular_function unknown%3B LOCATED IN: chloroplast%3B BEST Arabidopsis thaliana protein match is: unknown protein (TAIR:AT1G70900.1)%3B Has 59 Blast hits to 59 proteins in 15 species: Archae - 0%3B Bacteria - 0%3B Metazoa - 0%3B Fungi - 0%3B Plants - 59%3B Viruses - 0%3B Other Eukaryotes - …	GO:0003674
dubium	female-biased	OG0001129	AT5G63810	ID=AT5G63810;Name=AT5G63810;Note=beta-galactosidase 10;curator_summary=member of Glycoside Hydrolase Family 35;symbol=BGAL10;Alias=AtBGAL10,Arabidopsis thaliana beta-galactosidase 10;full_name=beta-galactosidase 10;computational_description=beta-galactosidase 10 (BGAL10)%3B FUNCTIONS IN: cation binding%2C beta-galactosidase activity%2C hydrolase activity%2C hydrolyzing O-glycosyl compounds%2C cat…	GO:0009536,GO:0005975,GO:0005773,GO:0048046,GO:0005618,GO:0005576,GO:0004565,GO:0080167
dubium	female-biased	OG0001184	ATCG01250	ID=ATCG01250;Note=NADH-quinone oxidoreductase protein;Name=ATCG01250;curator_summary=NADH dehydrogenase ND2;symbol=NDHB.2;computational_description=NDHB.2%3B FUNCTIONS IN: NADH dehydrogenase (ubiquinone) activity%3B INVOLVED IN: oxidation reduction%2C ATP synthesis coupled electron transport%3B LOCATED IN: endomembrane system%3B CONTAINS InterPro DOMAIN/s: NADH:ubiquinone/plastoquinone oxidoreduc…	GO:0009535,GO:0008137,GO:0016021,GO:0048038,GO:0042773,GO:0009507
dubium	female-biased	OG0001197	AT3G01500	ID=AT3G01500;Name=AT3G01500;Note=carbonic anhydrase 1;curator_summary=Encodes a putative beta-carbonic anhydrase betaCA1. Together with betaCA4 (At1g70410) regulates CO2-controlled stomatal movements in guard cells.;symbol=CA1;Alias=ATBCA1,BETA CARBONIC ANHYDRASE 1,ATSABP3,ARABIDOPSIS THALIANA SALICYLIC ACID-BINDING PROTEIN 3,SABP3,SALICYLIC ACID-BINDING PROTEIN 3;full_name=carbonic anhydrase 1;c…	GO:0009579,GO:0009941,GO:0009535,GO:2000122,GO:0010319,GO:0009817,GO:0005829,GO:0005886,GO:0008270,GO:0009440,GO:0005737,GO:0048046,GO:0015976,GO:0010119,GO:0042742,GO:0009570,GO:0009409,GO:0010037,GO:0004089,GO:0015979,GO:0009507
dubium	female-biased	OG0001246	AT3G26510	ID=AT3G26510;Name=AT3G26510;Note=Octicosapeptide/Phox/Bem1p family protein;computational_description=Octicosapeptide/Phox/Bem1p family protein%3B CONTAINS InterPro DOMAIN/s: Octicosapeptide/Phox/Bem1p (InterPro:IPR000270)%3B BEST Arabidopsis thaliana protein match is: octicosapeptide/Phox/Bem1p (PB1) domain-containing protein (TAIR:AT1G70640.1)%3B Has 35333 Blast hits to 34131 proteins in 2444 sp…	GO:0005634,GO:0008150,GO:0005515
dubium	female-biased	OG0001303	AT5G17230	ID=AT5G17230;Name=AT5G17230;Note=PHYTOENE SYNTHASE;curator_summary=Encodes phytoene synthase.;symbol=PSY;full_name=PHYTOENE SYNTHASE;computational_description=PHYTOENE SYNTHASE (PSY)%3B FUNCTIONS IN: phytoene synthase activity%2C geranylgeranyl-diphosphate geranylgeranyltransferase activity%3B INVOLVED IN: carotenoid biosynthetic process%3B LOCATED IN: chloroplast%3B EXPRESSED IN: 23 plant struct…	GO:0031969,GO:0046905,GO:0010287,GO:0051996,GO:0004310,GO:0016767,GO:0005515,GO:0006696,GO:0016117,GO:0009507
dubium	female-biased	OG0001335	AT1G18420	ID=AT1G18420;Name=AT1G18420;Note=aluminum activated malate transporter family protein;computational_description=Aluminium activated malate transporter family protein%3B INVOLVED IN: response to aluminum ion%3B CONTAINS InterPro DOMAIN/s: Malate transporter%2C aliminium toerance (InterPro:IPR020966)%3B BEST Arabidopsis thaliana protein match is: aluminum-activated malate transporter 9 (TAIR:AT3G18…	GO:0071423,GO:0016021,GO:0009705,GO:0016036,GO:0035618,GO:0005886,GO:0009507
dubium	female-biased	OG0001466	AT2G04700	ID=AT2G04700;Name=AT2G04700;Note=ferredoxin thioredoxin reductase catalytic beta chain family protein;computational_description=ferredoxin thioredoxin reductase catalytic beta chain family protein%3B FUNCTIONS IN: ferredoxin:thioredoxin reductase activity%2C ferredoxin reductase activity%3B INVOLVED IN: oxidation reduction%3B LOCATED IN: chloroplast%3B EXPRESSED IN: 22 plant structures%3B EXPRESS…	GO:0009941,GO:0030385,GO:0009570,GO:0103012,GO:0046872,GO:0009507
dubium	female-biased	OG0001480	AT2G17350	ID=AT2G17350;Name=AT2G17350;Note=beta-mannosyltransferase-like protein;computational_description=unknown protein%3B Has 119 Blast hits to 93 proteins in 40 species: Archae - 0%3B Bacteria - 3%3B Metazoa - 18%3B Fungi - 12%3B Plants - 44%3B Viruses - 0%3B Other Eukaryotes - 42 (source: NCBI BLink).;Dbxref=locus:2827566;locus_type=protein_coding	GO:0005737,GO:0008150,GO:0016757
dubium	female-biased	OG0001489	AT5G01410	ID=AT5G01410;Name=AT5G01410;Note=Aldolase-type TIM barrel family protein;curator_summary=Encodes a protein predicted to function in tandem with PDX2 to form glutamine amidotransferase complex with involved in vitamin B6 biosynthesis.;symbol=RSR4;Alias=ATPDX1,ATPDX1.3,ARABIDOPSIS THALIANA PYRIDOXINE BIOSYNTHESIS 1.3,PDX1,PDX1.3,PYRIDOXINE BIOSYNTHESIS 1.3;full_name=REDUCED SUGAR RESPONSE 4;computa…	GO:0036381,GO:0009651,GO:0005737,GO:0015994,GO:0042538,GO:0016843,GO:0006982,GO:0006520,GO:0010335,GO:0042823,GO:0042803,GO:0012505,GO:0005886,GO:0009646,GO:0008615,GO:0010224,GO:0006979,GO:0004359,GO:0005829,GO:0005515,GO:0042819,GO:0046982
dubium	female-biased	OG0001492	AT2G23090	ID=AT2G23090;Name=AT2G23090;Note=Uncharacterized protein family SERF;computational_description=Uncharacterised protein family SERF%3B CONTAINS InterPro DOMAIN/s: Uncharacterised protein family SERF (InterPro:IPR007513)%3B Has 164 Blast hits to 164 proteins in 62 species: Archae - 0%3B Bacteria - 0%3B Metazoa - 0%3B Fungi - 42%3B Plants - 89%3B Viruses - 0%3B Other Eukaryotes - 33 (source: NCBI BL…	GO:0003674,GO:0008150
dubium	female-biased	OG0001713	AT1G06330	ID=AT1G06330;Name=AT1G06330;Note=Heavy metal transport/detoxification superfamily protein;computational_description=Heavy metal transport/detoxification superfamily protein %3B FUNCTIONS IN: copper ion binding%2C metal ion binding%3B INVOLVED IN: copper ion transport%2C metal ion transport%3B LOCATED IN: cellular_component unknown%3B CONTAINS InterPro DOMAIN/s: Heavy metal transport/detoxificatio…	GO:0005886
dubium	female-biased	OG0001747
dubium	female-biased	OG0001800	AT5G41761	ID=AT5G41761;Name=AT5G41761;Note=hypothetical protein;computational_description=unknown protein%3B FUNCTIONS IN: molecular_function unknown%3B INVOLVED IN: biological_process unknown%3B LOCATED IN: cellular_component unknown%3B BEST Arabidopsis thaliana protein match is: unknown protein (TAIR:AT3G55570.1)%3B Has 30201 Blast hits to 17322 proteins in 780 species: Archae - 12%3B Bacteria - 1396%3B …	GO:0008150,GO:0005634,GO:0009536,GO:0003674
dubium	female-biased	OG0002153	AT4G32700	ID=AT4G32700;Name=AT4G32700;Note=MUS308 and mammalian DNA polymerase-like protein;curator_summary=Encodes a homolog of Drosophila MUS308 and mammalian DNA polymerase%2C which prevent spontaneous or DNA damage-induced production of DNA double strand breaks. Two conserved functional domains: an N-terminal superfamily II DNA/RNA helicase domain and a C-terminal prokaryotic-type DNA polymerase I doma…	GO:0006310,GO:0005737,GO:0007049,GO:0008409,GO:1990067,GO:2000011,GO:0004386,GO:0003887,GO:0009933,GO:0006260,GO:0006261,GO:0051301,GO:0003677,GO:1902749,GO:0005634,GO:0010468,GO:0005524,GO:0009640
dubium	female-biased	OG0002228	AT5G20150	ID=AT5G20150;Name=AT5G20150;Note=SPX domain-containing protein 1;curator_summary=Expression is upregulated in the shoot of cax1/cax3 mutant. Additionally%2C its expression is responsive to both phosphate (Pi) and phosphite (Phi) in both roots and shoots.;symbol=SPX1;Alias=ATSPX1,ARABIDOPSIS THALIANA SPX DOMAIN GENE 1;full_name=SPX domain gene 1;computational_description=SPX domain gene 1 (SPX1)%3…	GO:0016036,GO:0005634,GO:0080040,GO:0005886,GO:0071456
dubium	female-biased	OG0002238
dubium	female-biased	OG0002477	AT4G17090	ID=AT4G17090;Name=AT4G17090;Note=chloroplast beta-amylase;curator_summary=Encodes a beta-amylase targeted to the chloroplast. Transgenic BMY8 RNAi lines fail to accumulate maltose during cold shock suggesting that maltose accumulation coincides with BMY8 expression. Apart from maltose%2C the sugar content of the RNAi lines were similar to wildtype (glucose and sucrose unaffected).;symbol=CT-BMY;A…	GO:0016161,GO:0009570,GO:0005829,GO:0005983,GO:0102229,GO:0005576,GO:0009409,GO:0000024
dubium	female-biased	OG0002734	AT5G01220	ID=AT5G01220;Name=AT5G01220;Note=sulfoquinovosyldiacylglycerol 2;curator_summary=Encodes a UDP-sulfoquinovose:DAG sulfoquinovosyltransferase that is involved in sulfolipid biosynthesis and whose expression is responsive to both phosphate (Pi) and phosphite (Phi) in both roots and shoots.;symbol=SQD2;full_name=sulfoquinovosyldiacylglycerol 2;computational_description=sulfoquinovosyldiacylglycerol …	GO:0031969,GO:0009941,GO:0009536,GO:0016021,GO:0009247,GO:0016036,GO:0016757,GO:0005886,GO:0046506,GO:0008194,GO:0046510,GO:0009507
dubium	female-biased	OG0002745	AT5G63380	ID=AT5G63380;Name=AT5G63380;Note=AMP-dependent synthetase and ligase family protein;curator_summary=Encodes a peroxisomal protein involved in the activation of fatty acids through esterification with CoA. At5g63380 preferentially activates fatty acids with increased chain length (C9:0 to C8:0) and thus shares characteristics with long-chain fatty acyl-CoA synthases. Also able to catalyze the conv…	GO:0031408,GO:0016207,GO:0004321,GO:0005777,GO:0005739,GO:0009695,GO:0016874,GO:0005524
dubium	female-biased	OG0002865
dubium	female-biased	OG0003098	AT1G61520	ID=AT1G61520;Name=AT1G61520;Note=PSI type III chlorophyll a/b-binding protein;curator_summary=PSI type III chlorophyll a/b-binding protein (Lhca3*1);symbol=LHCA3;full_name=photosystem I light harvesting complex gene 3;computational_description=photosystem I light harvesting complex gene 3 (LHCA3)%3B FUNCTIONS IN: chlorophyll binding%3B INVOLVED IN: photosynthesis%2C light harvesting%2C photosynth…	GO:0009535,GO:0009534,GO:0016168,GO:0046872,GO:0009522,GO:0010287,GO:0009579,GO:0005634,GO:0018298,GO:0009768,GO:0009416,GO:0005515,GO:0009409,GO:0009645,GO:0009644,GO:0016021,GO:0009507
dubium	female-biased	OG0003106	AT2G22780	ID=AT2G22780;Name=AT2G22780;Note=peroxisomal NAD-malate dehydrogenase 1;curator_summary=encodes an peroxisomal NAD-malate dehydrogenase that is involved in fatty acid beta-oxidation through providing NAD to the process of converting fatty acyl CoA to acetyl CoA.;symbol=PMDH1;full_name=peroxisomal NAD-malate dehydrogenase 1;computational_description=peroxisomal NAD-malate dehydrogenase 1 (PMDH1)%3…	GO:0005737,GO:0080093,GO:0031998,GO:0005777,GO:0006099,GO:0030060,GO:0006097,GO:0006108,GO:0009507
dubium	female-biased	OG0003331	AT2G38090	ID=AT2G38090;Name=AT2G38090;Note=Duplicated homeodomain-like superfamily protein;computational_description=Duplicated homeodomain-like superfamily protein%3B CONTAINS InterPro DOMAIN/s: Molecular chaperone%2C heat shock protein%2C Hsp40%2C DnaJ (InterPro:IPR015609)%2C SANT%2C eukarya (InterPro:IPR017884)%2C Myb-like DNA-binding domain%2C SHAQKYF class (InterPro:IPR006447)%2C SANT%2C DNA-binding (…	GO:0003700,GO:0006355,GO:0005634,GO:0044212
dubium	female-biased	OG0003422	AT1G52870	ID=AT1G52870;Name=AT1G52870;Note=Peroxisomal membrane 22 kDa (Mpv17/PMP22) family protein;computational_description=Peroxisomal membrane 22 kDa (Mpv17/PMP22) family protein%3B FUNCTIONS IN: molecular_function unknown%3B INVOLVED IN: biological_process unknown%3B LOCATED IN: integral to membrane%2C chloroplast%3B EXPRESSED IN: 21 plant structures%3B EXPRESSED DURING: 13 growth stages%3B CONTAINS I…	GO:0005737,GO:0008150,GO:0016021,GO:0003674,GO:0009507
dubium	female-biased	OG0003432	AT3G47420	ID=AT3G47420;Name=AT3G47420;Note=putative glycerol-3-phosphate transporter 1;curator_summary=Encodes a Pi starvation-responsive protein AtPS3. A member of the phosphate starvation-induced glycerol-3-phosphate permease gene family: AT3G47420(G3Pp1)%2C AT4G25220(G3Pp2)%2C AT1G30560(G3Pp3)%2C AT4G17550(G3Pp4) and AT2G13100(G3Pp5). Its expression is responsive to phosphate (Pi) and not phosphite (Phi…	GO:0055062,GO:0022857,GO:0016021,GO:0055085,GO:0008643
dubium	female-biased	OG0003621	AT2G47800	ID=AT2G47800;Name=AT2G47800;Note=multidrug resistance-associated protein 4;curator_summary=Encodes a plasma membrane localized ATPase transporter involved in multidrug transport. The expression of this gene is upregulated by herbicide safeners such as benoxacor%2C fluxofenim and fenclorim.;symbol=ABCC4;Alias=ATMRP4,multidrug resistance-associated protein 4,EST3,MRP4,multidrug resistance-associate…	GO:0005794,GO:0042626,GO:0008517,GO:0010118,GO:0016887,GO:0055085,GO:0009624,GO:0005773,GO:0005829,GO:0016020,GO:0000325,GO:0005774,GO:0008559,GO:0009506,GO:0009414,GO:0005886,GO:0009611,GO:0016021,GO:0005524,GO:0009507
dubium	female-biased	OG0003820	AT5G50740	ID=AT5G50740;Name=AT5G50740;Note=Heavy metal transport/detoxification superfamily protein;computational_description=Heavy metal transport/detoxification superfamily protein %3B FUNCTIONS IN: metal ion binding%3B INVOLVED IN: metal ion transport%3B LOCATED IN: cellular_component unknown%3B EXPRESSED IN: 20 plant structures%3B EXPRESSED DURING: 13 growth stages%3B CONTAINS InterPro DOMAIN/s: Heavy …	GO:0005737,GO:0046872,GO:0030001,GO:0005886
dubium	female-biased	OG0003955	ATCG01130	ID=ATCG01130;Note=Ycf1 protein;Name=ATCG01130;symbol=YCF1.2;computational_description=YCF1.2%3B FUNCTIONS IN: protein binding%3B LOCATED IN: chloroplast%2C membrane%3B EXPRESSED IN: cultured cell%2C leaf%3B CONTAINS InterPro DOMAIN/s: Ycf1 (InterPro:IPR008896)%3B BEST Arabidopsis thaliana protein match is: Ycf1 protein (TAIR:ATCG01000.1).;Dbxref=PMID:17432890,PMID:18650403,PMID:18682547,PMID:2337…	GO:0009941,GO:0009536,GO:0031897,GO:0009706,GO:0005623,GO:0005622,GO:0008320,GO:0005515,GO:0045037,GO:0016021,GO:0009507
dubium	female-biased	OG0003969	AT1G02640	ID=AT1G02640;Name=AT1G02640;Note=beta-xylosidase 2;curator_summary=encodes a protein similar to a beta-xylosidase located in the extracellular matrix. This is a member of glycosyl hydrolase family 3 and has six other closely related members.;symbol=BXL2;Alias=ATBXL2,BETA-XYLOSIDASE 2;full_name=beta-xylosidase 2;computational_description=beta-xylosidase 2 (BXL2)%3B FUNCTIONS IN: hydrolase activity…	GO:0046556,GO:0009044,GO:0005576,GO:0004553,GO:0031222,GO:0045493,GO:0009505
dubium	female-biased	OG0004034	AT3G61440	ID=AT3G61440;Name=AT3G61440;Note=cysteine synthase C1;curator_summary=Encodes a cysteine synthase isomer CysC1. The isomer is however less effective in cysteine biosynthesis. It is involved in beta-cyanoalanine biosynthesis%2C an intermediate of cyanide detoxification pathway.;symbol=CYSC1;Alias=ARATH%3BBSAS3%3B1,BETA-SUBSTITUTED ALA SYNTHASE 3%3B1,ATCYSC1,CYSTEINE SYNTHASE C1;full_name=cysteine …	GO:0005737,GO:0005507,GO:0019499,GO:0051410,GO:0080147,GO:0004124,GO:0005739,GO:0019500,GO:0006535,GO:0019344,GO:0030170,GO:0006955,GO:0050017,GO:0005829,GO:0009507
dubium	female-biased	OG0004124	AT2G38290	ID=AT2G38290;Name=AT2G38290;Note=ammonium transporter 2;curator_summary=encodes a high-affinity ammonium transporter%2C which is expressed in shoot and root. Expression in root and shoot is under nitrogen and carbon dioxide regulation%2C respectively.;symbol=AMT2;Alias=ATAMT2,ammonium transporter 2;full_name=ammonium transporter 2;computational_description=ammonium transporter 2 (AMT2)%3B FUNCTIO…	GO:0005737,GO:0019740,GO:0008519,GO:0015696,GO:0009624,GO:0072488,GO:0015398,GO:0005887,GO:0005886,GO:0009506
dubium	female-biased	OG0004270	AT2G23060	ID=AT2G23060;Name=AT2G23060;Note=Acyl-CoA N-acyltransferases (NAT) superfamily protein;computational_description=Acyl-CoA N-acyltransferases (NAT) superfamily protein%3B FUNCTIONS IN: N-acetyltransferase activity%3B INVOLVED IN: metabolic process%3B LOCATED IN: cellular_component unknown%3B EXPRESSED IN: embryo%2C leaf whorl%2C flower%2C pedicel%2C seed%3B EXPRESSED DURING: 4 anthesis%2C F mature…	GO:0005634,GO:0016747,GO:0008080
dubium	female-biased	OG0004281	AT1G06690	ID=AT1G06690;Name=AT1G06690;Note=NAD(P)-linked oxidoreductase superfamily protein;computational_description=NAD(P)-linked oxidoreductase superfamily protein%3B FUNCTIONS IN: oxidoreductase activity%2C aldo-keto reductase activity%3B INVOLVED IN: oxidation reduction%3B LOCATED IN: chloroplast thylakoid membrane%2C chloroplast%2C plastoglobule%2C chloroplast envelope%3B EXPRESSED IN: 22 plant struc…	GO:0009535,GO:0009941,GO:0010287,GO:0005576,GO:0009507,GO:0055114,GO:0016491
dubium	female-biased	OG0004295	AT5G23520	ID=AT5G23520;Name=AT5G23520;Note=smr (Small MutS Related) domain-containing protein;computational_description=smr (Small MutS Related) domain-containing protein%3B CONTAINS InterPro DOMAIN/s: Smr protein/MutS2 C-terminal (InterPro:IPR002625)%2C Domain of unknown function DUF1771 (InterPro:IPR013899)%3B Has 1807 Blast hits to 1807 proteins in 277 species: Archae - 0%3B Bacteria - 0%3B Metazoa - 73…	GO:0005737
dubium	female-biased	OG0004351	AT5G11110	ID=AT5G11110;Name=AT5G11110;Note=sucrose phosphate synthase 2F;curator_summary=Encodes a protein with putative sucrose-phosphate synthase activity.Involved in pollen exine formation.;symbol=SPS2F;Alias=ATSPS2F,sucrose phosphate synthase 2F,KNS2,KAONASHI 2,SPS1,SUCROSE PHOSPHATE SYNTHASE 1,SPSA2,sucrose-phosphate synthase A2;full_name=sucrose phosphate synthase 2F;computational_description=sucrose…	GO:0016157,GO:0005634,GO:0010208,GO:0005986,GO:0046524,GO:0005886,GO:0071836
dubium	female-biased	OG0004359	AT3G09600	ID=AT3G09600;Name=AT3G09600;Note=Homeodomain-like superfamily protein;curator_summary=Encodes a MYB-like transcription factor similar to CIRCADIAN CLOCK-ASSOCIATED1 (CCA1) and ELONGATED HYPOCOTYL (LHY). Involved in the regulation of circadian clock by modulating the pattern of histone 3 (H3) acetylation.;symbol=RVE8;Alias=LCL5,LHY-CCA1-LIKE5;full_name=REVEILLE 8;computational_description=Homeodom…	GO:0009733,GO:0048573,GO:0032922,GO:0009737,GO:0043966,GO:0009753,GO:0043565,GO:0003700,GO:0009751,GO:0005634,GO:0009723,GO:0006355,GO:0042752,GO:0010628,GO:0045944,GO:0042753,GO:0046686,GO:0009651,GO:0009739
dubium	female-biased	OG0004418	AT3G56290	ID=AT3G56290;Name=AT3G56290;Note=potassium transporter;computational_description=unknown protein%3B Has 39 Blast hits to 39 proteins in 15 species: Archae - 0%3B Bacteria - 0%3B Metazoa - 0%3B Fungi - 0%3B Plants - 39%3B Viruses - 0%3B Other Eukaryotes - 0 (source: NCBI BLink).;Dbxref=PMID:12953064,PMID:14576160,PMID:16330762,PMID:18315867,PMID:22383539,locus:2078391;locus_type=protein_coding	GO:0009658,GO:0003674,GO:0045893,GO:0005739
dubium	female-biased	OG0004483
dubium	female-biased	OG0004700	AT4G33010	ID=AT4G33010;Name=AT4G33010;Note=glycine decarboxylase P-protein 1;symbol=GLDP1;Alias=AtGLDP1,glycine decarboxylase P-protein 1;full_name=glycine decarboxylase P-protein 1;computational_description=glycine decarboxylase P-protein 1 (GLDP1)%3B FUNCTIONS IN: glycine dehydrogenase (decarboxylating) activity%2C protein binding%3B INVOLVED IN: glycine catabolic process%2C response to cadmium ion%2C gl…	GO:0009941,GO:0005960,GO:0004375,GO:0009534,GO:0009570,GO:0005829,GO:0006546,GO:0005739,GO:0048046,GO:0030170,GO:0005515,GO:0005886,GO:0046686,GO:0016594,GO:0019464,GO:0055114,GO:0009507
dubium	female-biased	OG0004789	AT2G02450	ID=AT2G02450;Name=AT2G02450;Note=NAC domain containing protein 35;symbol=LOV1;Alias=ANAC034,Arabidopsis NAC domain containing protein 34,ANAC035,NAC domain containing protein 35,AtLOV1,NAC035,NAC domain containing protein 35;full_name=LONG VEGETATIVE PHASE 1;computational_description=LONG VEGETATIVE PHASE 1 (LOV1)%3B FUNCTIONS IN: sequence-specific DNA binding transcription factor activity%3B INV…	GO:0003700,GO:0006355,GO:0005634,GO:0009908,GO:0003677
dubium	female-biased	OG0004934	AT5G02020	ID=AT5G02020;Name=AT5G02020;Note=E3 ubiquitin-protein ligase RLIM-like protein;curator_summary=Encodes a protein involved in salt tolerance%2C names SIS (Salt Induced Serine rich).;symbol=SIS;full_name=Salt Induced Serine rich;computational_description=unknown protein%3B FUNCTIONS IN: molecular_function unknown%3B INVOLVED IN: biological_process unknown%3B LOCATED IN: chloroplast%3B EXPRESSED IN:…	GO:0009651,GO:0005634
dubium	female-biased	OG0005074	AT2G37240	ID=AT2G37240;Name=AT2G37240;Note=Thioredoxin superfamily protein;computational_description=Thioredoxin superfamily protein%3B FUNCTIONS IN: oxidoreductase activity%2C antioxidant activity%3B INVOLVED IN: biological_process unknown%3B LOCATED IN: chloroplast%3B EXPRESSED IN: 21 plant structures%3B EXPRESSED DURING: 14 growth stages%3B CONTAINS InterPro DOMAIN/s: Thioredoxin fold (InterPro:IPR01233…	GO:0016209,GO:0005576,GO:0055114,GO:0009507
dubium	female-biased	OG0005187	AT2G47880	ID=AT2G47880;Name=AT2G47880;Note=Glutaredoxin family protein;computational_description=Glutaredoxin family protein%3B FUNCTIONS IN: electron carrier activity%2C arsenate reductase (glutaredoxin) activity%2C protein disulfide oxidoreductase activity%3B INVOLVED IN: cell redox homeostasis%3B LOCATED IN: endomembrane system%3B EXPRESSED IN: 11 plant structures%3B EXPRESSED DURING: 7 growth stages%3B…	GO:0005737,GO:0006995,GO:0005634,GO:0005515,GO:0045454,GO:0015035,GO:0009055
dubium	female-biased	OG0005459	AT5G35970	ID=AT5G35970;Name=AT5G35970;Note=P-loop containing nucleoside triphosphate hydrolases superfamily protein;computational_description=P-loop containing nucleoside triphosphate hydrolases superfamily protein%3B FUNCTIONS IN: hydrolase activity%2C DNA binding%2C ATP binding%3B INVOLVED IN: biological_process unknown%3B LOCATED IN: chloroplast%2C chloroplast envelope%3B EXPRESSED IN: 22 plant structur…	GO:0009570,GO:0009941,GO:0009507
dubium	female-biased	OG0005491	AT1G08810	ID=AT1G08810;Name=AT1G08810;Note=myb domain protein 60;curator_summary=putative transcription factor of the R2R3-MYB gene family. Transcript increases under conditions that promote stomatal opening (white and blue light%2C abi1-1 mutation) and decreases under conditions that trigger stomatal closure (ABA%2C desiccation%2C darkness)%2C with the exception of elevated CO2. Expressed exclusively in g…	GO:0009733,GO:0044212,GO:0009744,GO:0080148,GO:0009751,GO:0009753,GO:0043565,GO:0003700,GO:0009739,GO:0030154,GO:0009637,GO:0009723,GO:0009411,GO:0009416,GO:0010118,GO:0009414,GO:0009646,GO:0009409,GO:0009737,GO:0005634,GO:1902074
dubium	female-biased	OG0005522	AT4G19170	ID=AT4G19170;Name=AT4G19170;Note=nine-cis-epoxycarotenoid dioxygenase 4;curator_summary=chloroplast-targeted member of a family of enzymes similar to nine-cis-epoxycarotenoid dioxygenase;symbol=NCED4;Alias=CCD4,carotenoid cleavage dioxygenase 4;full_name=nine-cis-epoxycarotenoid dioxygenase 4;computational_description=nine-cis-epoxycarotenoid dioxygenase 4 (NCED4)%3B LOCATED IN: chloroplast%2C pl…	GO:0016121,GO:0009570,GO:0010287,GO:0005515,GO:0046872,GO:0010436,GO:0005829,GO:0055114,GO:0009507
dubium	female-biased	OG0005719	AT3G62410	ID=AT3G62410;Name=AT3G62410;Note=CP12 domain-containing protein 2;curator_summary=CP12-2 encodes a small peptide found in the chloroplast stroma. It belongs to the CP12 gene family thought to be involved in the formation of a supramolecular complex with glyceraldehyde-3-phosphate dehydrogenase (GAPDH) and phosphoribulokinase (PRK) embedded in the Calvin cycle. CP12-2 is coordinately regulated by …	GO:0009744,GO:0032991,GO:0009570,GO:0034605,GO:0018316,GO:0070417,GO:0009416,GO:0071454,GO:0005515,GO:0080153,GO:0005829,GO:0019253,GO:0009507
dubium	female-biased	OG0005937	AT2G15490	ID=AT2G15490;Name=AT2G15490;Note=UDP-glycosyltransferase 73B4;symbol=UGT73B4;full_name=UDP-glycosyltransferase 73B4;computational_description=UDP-glycosyltransferase 73B4 (UGT73B4)%3B FUNCTIONS IN: quercetin 3-O-glucosyltransferase activity%2C UDP-glycosyltransferase activity%2C quercetin 7-O-glucosyltransferase activity%2C UDP-glucosyltransferase activity%2C transferase activity%2C transferring …	GO:0102425,GO:0080044,GO:0051707,GO:0035251,GO:0047893,GO:0009636,GO:0102360,GO:0043231,GO:0080043,GO:0016757,GO:0008194,GO:0005829,GO:0009507
dubium	female-biased	OG0006327	AT1G76110	ID=AT1G76110;Name=AT1G76110;Note=HMG (high mobility group) box protein with ARID/BRIGHT DNA-binding domain-containing protein;computational_description=HMG (high mobility group) box protein with ARID/BRIGHT DNA-binding domain%3B FUNCTIONS IN: sequence-specific DNA binding transcription factor activity%3B INVOLVED IN: regulation of transcription%3B LOCATED IN: intracellular%2C nucleus%3B EXPRESSED…	GO:0000741,GO:0003700,GO:0005634,GO:0006355,GO:0010197,GO:0005515,GO:0003677
dubium	female-biased	OG0006344
dubium	female-biased	OG0006515	AT4G26530	ID=AT4G26530;Name=AT4G26530;Note=Aldolase superfamily protein;symbol=FBA5;Alias=AtFBA5;full_name=fructose-bisphosphate aldolase 5;computational_description=Aldolase superfamily protein%3B FUNCTIONS IN: fructose-bisphosphate aldolase activity%3B INVOLVED IN: glycolysis%2C metabolic process%3B LOCATED IN: chloroplast%3B EXPRESSED IN: 18 plant structures%3B EXPRESSED DURING: 11 growth stages%3B CONT…	GO:0005737,GO:0005515,GO:0005829,GO:0030388,GO:0004332,GO:0006096,GO:0006094
dubium	female-biased	OG0006688	AT4G09620	ID=AT4G09620;Name=AT4G09620;Note=Mitochondrial transcription termination factor family protein;computational_description=Mitochondrial transcription termination factor family protein%3B FUNCTIONS IN: molecular_function unknown%3B INVOLVED IN: biological_process unknown%3B LOCATED IN: chloroplast%3B EXPRESSED IN: 24 plant structures%3B EXPRESSED DURING: 15 growth stages%3B CONTAINS InterPro DOMAIN…	GO:0042646,GO:0006355,GO:0003690,GO:0005829,GO:0009507
dubium	female-biased	OG0006732
dubium	female-biased	OG0006873	AT3G08740	ID=AT3G08740;Name=AT3G08740;Note=elongation factor P (EF-P) family protein;computational_description=elongation factor P (EF-P) family protein%3B FUNCTIONS IN: translation elongation factor activity%3B INVOLVED IN: translational elongation%3B LOCATED IN: chloroplast%2C chloroplast stroma%3B EXPRESSED IN: 24 plant structures%3B EXPRESSED DURING: 14 growth stages%3B CONTAINS InterPro DOMAIN/s: Tran…	GO:0005737,GO:0009570,GO:0005829,GO:0003746,GO:0006414,GO:0009507
dubium	female-biased	OG0006950
dubium	female-biased	OG0007349	AT4G15530	ID=AT4G15530;Name=AT4G15530;Note=pyruvate orthophosphate dikinase;curator_summary=The product of this long transcript was shown to be targeted to the chloroplast%2C whereas the shorter transcript (no targeting sequence) accumulates in the cytosol. They were also found in slightly different tissues.;symbol=PPDK;full_name=pyruvate orthophosphate dikinase;computational_description=pyruvate orthophos…	GO:0046872,GO:0009570,GO:0005829,GO:0016301,GO:0015979,GO:0050242,GO:0016310,GO:0006090,GO:0005634,GO:0005524,GO:0009507
dubium	female-biased	OG0007396	AT1G18730	ID=AT1G18730;Name=AT1G18730;Note=NDH dependent flow 6;curator_summary=likely a subunit of the chloroplast NAD(P)H dehydrogenase complex%2C involved in PSI cyclic electron transport. Located on the thylakoid membrane. Mutant has impaired NAD(P)H dehydrogenase activity.;symbol=PnsB4;Alias=NDF6,NDH dependent flow 6;full_name=Photosynthetic NDH subcomplex B 4;computational_description=NDH dependent f…	GO:0009535,GO:0010598,GO:0016021,GO:0003674,GO:0009773,GO:0009507
dubium	female-biased	OG0007435	AT1G77090	ID=AT1G77090;Name=AT1G77090;Note=thylakoid lumenal protein (Mog1/PsbP/DUF1795-like photosystem II reaction center PsbP family protein);computational_description=Mog1/PsbP/DUF1795-like photosystem II reaction center PsbP family protein%3B FUNCTIONS IN: calcium ion binding%3B INVOLVED IN: photosynthesis%3B LOCATED IN: thylakoid%2C thylakoid lumen%2C chloroplast thylakoid lumen%2C chloroplast stroma…	GO:0009579,GO:0009534,GO:0009570,GO:0005829,GO:0031977,GO:0005739,GO:0009543,GO:0005509,GO:0019898,GO:0009654,GO:0015979,GO:0009507
dubium	female-biased	OG0007488	AT2G46915	ID=AT2G46915;Name=AT2G46915;Note=DUF3754 family protein%2C putative (DUF3754);computational_description=Protein of unknown function (DUF3754)%3B FUNCTIONS IN: molecular_function unknown%3B INVOLVED IN: biological_process unknown%3B LOCATED IN: chloroplast%3B EXPRESSED IN: male gametophyte%2C pollen tube%3B EXPRESSED DURING: L mature pollen stage%2C M germinated pollen stage%3B CONTAINS InterPro D…	GO:0008150,GO:0003674,GO:0009507
dubium	female-biased	OG0007751	AT3G19270	ID=AT3G19270;Name=AT3G19270;Note=cytochrome P450%2C family 707%2C subfamily A%2C polypeptide 4;curator_summary=Encodes a protein with ABA 8'-hydroxylase activity%2C involved in ABA catabolism. Member of the CYP707A gene family.;symbol=CYP707A4;full_name=cytochrome P450%2C family 707%2C subfamily A%2C polypeptide 4;computational_description=cytochrome P450%2C family 707%2C subfamily A%2C polypepti…	GO:0004497,GO:0016125,GO:0020037,GO:0016132,GO:0016021,GO:0010295,GO:0046345,GO:0005739,GO:0010268,GO:0005506,GO:0007275,GO:0055114,GO:0016491
dubium	female-biased	OG0007985	AT1G18170	ID=AT1G18170;Name=AT1G18170;Note=FKBP-like peptidyl-prolyl cis-trans isomerase family protein;computational_description=FKBP-like peptidyl-prolyl cis-trans isomerase family protein%3B FUNCTIONS IN: FK506 binding%2C peptidyl-prolyl cis-trans isomerase activity%3B INVOLVED IN: protein folding%3B LOCATED IN: chloroplast thylakoid membrane%2C chloroplast%3B EXPRESSED IN: 21 plant structures%3B EXPRES…	GO:0009535,GO:0005634,GO:0009543,GO:0003755,GO:0009507
dubium	female-biased	OG0008035	AT1G70820	ID=AT1G70820;Name=AT1G70820;Note=phosphoglucomutase%2C putative / glucose phosphomutase;computational_description=phosphoglucomutase%2C putative / glucose phosphomutase%2C putative%3B FUNCTIONS IN: intramolecular transferase activity%2C phosphotransferases%3B INVOLVED IN: carbohydrate metabolic process%3B LOCATED IN: chloroplast%3B EXPRESSED IN: 20 plant structures%3B EXPRESSED DURING: 13 growth …	GO:0009570,GO:0005975,GO:0004615,GO:0009507
dubium	female-biased	OG0008319	AT4G27030	ID=AT4G27030;Name=AT4G27030;Note=fatty acid desaturase A;curator_summary=Encodes an unusual palmitate desaturase that is highly substrate specific. It introduces a delta-3 trans double bond at palmitate at the sn-2 position of phosphatidylglycerol.;symbol=FADA;Alias=FAD4,FATTY ACID DESATURASE 4;full_name=fatty acid desaturase A;computational_description=fatty acid desaturase A (FADA)%3B FUNCTIONS…	GO:0031969,GO:0052637,GO:0006636,GO:0016021,GO:0080167,GO:0046471,GO:0055114,GO:0009507
dubium	female-biased	OG0008441	AT2G15020	ID=AT2G15020;Name=AT2G15020;Note=hypothetical protein;computational_description=unknown protein%3B BEST Arabidopsis thaliana protein match is: unknown protein (TAIR:AT5G64190.1)%3B Has 72 Blast hits to 72 proteins in 10 species: Archae - 0%3B Bacteria - 0%3B Metazoa - 0%3B Fungi - 0%3B Plants - 72%3B Viruses - 0%3B Other Eukaryotes - 0 (source: NCBI BLink).;Dbxref=PMID:12953064,PMID:17337630,locu…	GO:0005575,GO:0008150,GO:0003674
dubium	female-biased	OG0008604	AT1G11700	ID=AT1G11700;Name=AT1G11700;Note=senescence regulator (Protein of unknown function%2C DUF584);computational_description=Protein of unknown function%2C DUF584%3B FUNCTIONS IN: molecular_function unknown%3B INVOLVED IN: biological_process unknown%3B LOCATED IN: chloroplast%3B EXPRESSED IN: 21 plant structures%3B EXPRESSED DURING: 11 growth stages%3B CONTAINS InterPro DOMAIN/s: Protein of unknown fu…	GO:0008150,GO:0003674
dubium	female-biased	OG0008765	AT1G57770	ID=AT1G57770;Name=AT1G57770;Note=FAD/NAD(P)-binding oxidoreductase family protein;computational_description=FAD/NAD(P)-binding oxidoreductase family protein%3B FUNCTIONS IN: oxidoreductase activity%3B LOCATED IN: chloroplast%3B EXPRESSED IN: 21 plant structures%3B EXPRESSED DURING: 13 growth stages%3B CONTAINS InterPro DOMAIN/s: Amine oxidase (InterPro:IPR002937)%3B BEST Arabidopsis thaliana prot…	GO:0005634,GO:0016491,GO:0055114,GO:0009507
dubium	female-biased	OG0008790	AT5G43750	ID=AT5G43750;Name=AT5G43750;Note=NAD(P)H dehydrogenase 18;symbol=PnsB5;Alias=NDH18,NAD(P)H dehydrogenase 18;full_name=Photosynthetic NDH subcomplex B 5;computational_description=NAD(P)H dehydrogenase 18 (NDH18)%3B FUNCTIONS IN: molecular_function unknown%3B INVOLVED IN: response to oxidative stress%3B LOCATED IN: chloroplast thylakoid membrane%2C chloroplast%3B EXPRESSED IN: 22 plant structures%3…	GO:0009535,GO:0031969,GO:0009536,GO:0016021,GO:0003674,GO:0006979,GO:0009507
dubium	female-biased	OG0009207	AT3G47430	ID=AT3G47430;Name=AT3G47430;Note=peroxin 11B;curator_summary=member of the peroxin11 (PEX11) gene family%2C located on the peroxisome membrane%2C controls peroxisome proliferation.;symbol=PEX11B;full_name=peroxin 11B;computational_description=peroxin 11B (PEX11B)%3B CONTAINS InterPro DOMAIN/s: Peroxisomal biogenesis factor 11 (InterPro:IPR008733)%3B BEST Arabidopsis thaliana protein match is: per…	GO:0005779,GO:0005778,GO:0016559,GO:0044375,GO:0005829,GO:0005777,GO:0007031,GO:0005515,GO:0042802
dubium	female-biased	OG0009248	AT2G39730	ID=AT2G39730;Name=AT2G39730;Note=rubisco activase;curator_summary=Rubisco activase%2C a nuclear-encoded chloroplast protein that consists of two isoforms arising from alternative splicing in most plants. Required for the light activation of rubisco. Involved in jasmonate-induced leaf senescence.;symbol=RCA;full_name=rubisco activase;computational_description=rubisco activase (RCA)%3B FUNCTIONS IN…	GO:0009535,GO:0009941,GO:0010319,GO:0043531,GO:0009753,GO:0010150,GO:0005618,GO:0009570,GO:0010287,GO:0048046,GO:0009416,GO:0042742,GO:0005794,GO:0009409,GO:0046863,GO:0009579,GO:0030234,GO:0005634,GO:0005524,GO:0009507
dubium	female-biased	OG0009279
dubium	female-biased	OG0009385	AT5G24120	ID=AT5G24120;Name=AT5G24120;Note=sigma factor E;curator_summary=Encodes a specialized sigma factor that functions in regulation of plastid genes and is responsible for the light-dependent transcription at the psbD LRP. Activation of SIG5 is dependent upon blue light and mediated by cryptochromes.;symbol=SIGE;Alias=ATSIG5,SIGMA FACTOR 5,SIG5,SIGMA FACTOR 5;full_name=sigma factor E;computational_de…	GO:0009553,GO:0010207,GO:0071483,GO:0005515,GO:0003700,GO:0071472,GO:0003677,GO:0009637,GO:0010218,GO:0016987,GO:0009658,GO:0005739,GO:0045893,GO:0006352,GO:2001141,GO:0010114,GO:0009507
dubium	female-biased	OG0009405	AT1G07010	ID=AT1G07010;Name=AT1G07010;Note=Calcineurin-like metallo-phosphoesterase superfamily protein;symbol=SLP1;Alias=AtSLP1;full_name=Shewenella-like protein phosphatase 1;computational_description=Calcineurin-like metallo-phosphoesterase superfamily protein%3B FUNCTIONS IN: hydrolase activity%2C protein serine/threonine phosphatase activity%3B INVOLVED IN: biological_process unknown%3B LOCATED IN: pe…	GO:0016791,GO:0005777,GO:0030145,GO:0004721,GO:0009507
dubium	female-biased	OG0009482	AT1G76450	ID=AT1G76450;Name=AT1G76450;Note=Photosystem II reaction center PsbP family protein;computational_description=Photosystem II reaction center PsbP family protein%3B FUNCTIONS IN: calcium ion binding%3B INVOLVED IN: photosynthesis%3B LOCATED IN: thylakoid%2C thylakoid lumen%2C chloroplast thylakoid membrane%2C chloroplast thylakoid lumen%2C chloroplast%3B EXPRESSED IN: 23 plant structures%3B EXPRES…	GO:0009579,GO:0009535,GO:0031977,GO:0005739,GO:0009543,GO:0005509,GO:0019898,GO:0009654,GO:0015979,GO:0009507
dubium	female-biased	OG0009483	AT3G53470	ID=AT3G53470;Name=AT3G53470;Note=2%2C3-bisphosphoglycerate-independent phosphoglycerate mutase;computational_description=unknown protein%3B FUNCTIONS IN: molecular_function unknown%3B INVOLVED IN: biological_process unknown%3B LOCATED IN: chloroplast thylakoid membrane%2C chloroplast%3B EXPRESSED IN: 22 plant structures%3B EXPRESSED DURING: 13 growth stages%3B Has 35 Blast hits to 35 proteins in …	GO:0009535,GO:0016021,GO:0005739,GO:0008150,GO:0003674,GO:0009507
dubium	female-biased	OG0009566	AT5G62840	ID=AT5G62840;Name=AT5G62840;Note=Phosphoglycerate mutase family protein;computational_description=Phosphoglycerate mutase family protein%3B FUNCTIONS IN: catalytic activity%3B INVOLVED IN: metabolic process%3B LOCATED IN: chloroplast%3B EXPRESSED IN: 20 plant structures%3B EXPRESSED DURING: 13 growth stages%3B CONTAINS InterPro DOMAIN/s: Histidine phosphatase superfamily%2C clade-1 (InterPro:IPR0…	GO:0009507
dubium	female-biased	OG0009593	AT2G03420	ID=AT2G03420;Name=AT2G03420;Note=hypothetical protein;computational_description=unknown protein%3B Has 38 Blast hits to 38 proteins in 17 species: Archae - 0%3B Bacteria - 0%3B Metazoa - 0%3B Fungi - 0%3B Plants - 38%3B Viruses - 0%3B Other Eukaryotes - 0 (source: NCBI BLink).;Dbxref=PMID:11719511,PMID:18650403,locus:2063819;locus_type=protein_coding	GO:0008150,GO:0003674,GO:0005739,GO:0009507
dubium	female-biased	OG0009604	AT3G24460	ID=AT3G24460;Name=AT3G24460;Note=Serinc-domain containing serine and sphingolipid biosynthesis protein;computational_description=Serinc-domain containing serine and sphingolipid biosynthesis protein%3B LOCATED IN: membrane%3B EXPRESSED IN: 10 plant structures%3B EXPRESSED DURING: LP.06 six leaves visible%2C LP.04 four leaves visible%2C 4 anthesis%2C petal differentiation and expansion stage%3B CO…	GO:0016021,GO:0016020
dubium	female-biased	OG0010143	AT1G24625	ID=AT1G24625;Name=AT1G24625;Note=zinc finger protein 7;curator_summary=Encodes a zinc finger protein containing only a single zinc finger.;symbol=ZFP7;full_name=zinc finger protein 7;computational_description=zinc finger protein 7 (ZFP7)%3B FUNCTIONS IN: sequence-specific DNA binding transcription factor activity%2C zinc ion binding%2C nucleic acid binding%3B INVOLVED IN: regulation of transcript…	GO:0044212,GO:0046872,GO:0043565,GO:0003700,GO:0019760,GO:0005634,GO:0009738,GO:0006355,GO:0005515,GO:0009788,GO:0046982
dubium	female-biased	OG0010172
dubium	female-biased	OG0010324	AT5G02070	ID=AT5G02070;Name=AT5G02070;Note=Protein kinase family protein;computational_description=Protein kinase family protein%3B FUNCTIONS IN: kinase activity%3B INVOLVED IN: protein amino acid phosphorylation%3B CONTAINS InterPro DOMAIN/s: Protein kinase%2C ATP binding site (InterPro:IPR017441)%2C Protein kinase%2C catalytic domain (InterPro:IPR000719)%2C Serine/threonine-protein kinase-like domain (In…	GO:0006468,GO:0016021,GO:0016301,GO:0030247,GO:0004674,GO:0007166,GO:0005886,GO:0005524
dubium	female-biased	OG0010363	AT1G44575	ID=AT1G44575;Name=AT1G44575;Note=Chlorophyll A-B binding family protein;curator_summary=Encoding PSII-S (CP22)%2C a ubiquitous pigment-binding protein associated with photosystem II (PSII) of higher plants. Involved in nonphotochemical quenching rather than in photosynthesis. Mutant has a normal violaxanthin cycle but has a limited capacity of quenching singlet excited chlorophylls and is toleran…	GO:0009535,GO:0009534,GO:0016168,GO:0009523,GO:0016021,GO:0005634,GO:0051738,GO:0010196,GO:0080167,GO:0009517,GO:0010027,GO:0009579,GO:0015979,GO:0009507
dubium	female-biased	OG0010406	ATMG00513	ID=ATMG00513;Note=NADH dehydrogenase 5A;Name=ATMG00513;curator_summary=Mitochondrial NADH dehydrogenase subunit 5. The gene is trans-spliced from three different pre-cursors%2C NAD5a%2C NAD5b and NAD5c.;symbol=NAD5A;Alias=NAD5.1,NADH DEHYDROGENASE 5.1,NAD5,NADH DEHYDROGENASE SUBUNIT 5;full_name=NADH dehydrogenase 5A;computational_description=NADH dehydrogenase 5A (NAD5A)%3B CONTAINS InterPro DOMA…	GO:0008137,GO:0016021,GO:0005739,GO:0042773,GO:0005743,GO:0045333,GO:0005747,GO:0070469,GO:0003954,GO:0055114
dubium	female-biased	OG0010456	ATMG00810	ID=ATMG00810;Note=DNA/RNA polymerases superfamily protein;Name=ATMG00810;symbol=ORF240B;computational_description=DNA/RNA polymerases superfamily protein%3B CONTAINS InterPro DOMAIN/s: Reverse transcriptase%2C RNA-dependent DNA polymerase (InterPro:IPR013103)%3B BEST Arabidopsis thaliana protein match is: cysteine-rich RLK (RECEPTOR-like protein kinase) 8 (TAIR:AT4G23160.1).;Dbxref=locus:50495456…	GO:0008150,GO:0003674,GO:0005739
dubium	female-biased	OG0010568	AT5G13770	ID=AT5G13770;Name=AT5G13770;Note=Pentatricopeptide repeat (PPR-like) superfamily protein;computational_description=Pentatricopeptide repeat (PPR-like) superfamily protein%3B FUNCTIONS IN: molecular_function unknown%3B INVOLVED IN: biological_process unknown%3B LOCATED IN: chloroplast%3B EXPRESSED IN: 22 plant structures%3B EXPRESSED DURING: 15 growth stages%3B CONTAINS InterPro DOMAIN/s: Pentatri…	GO:0009658,GO:0009507
dubium	female-biased	OG0010655
dubium	female-biased	OG0010754	ATCG01130	ID=ATCG01130;Note=Ycf1 protein;Name=ATCG01130;symbol=YCF1.2;computational_description=YCF1.2%3B FUNCTIONS IN: protein binding%3B LOCATED IN: chloroplast%2C membrane%3B EXPRESSED IN: cultured cell%2C leaf%3B CONTAINS InterPro DOMAIN/s: Ycf1 (InterPro:IPR008896)%3B BEST Arabidopsis thaliana protein match is: Ycf1 protein (TAIR:ATCG01000.1).;Dbxref=PMID:17432890,PMID:18650403,PMID:18682547,PMID:2337…	GO:0009941,GO:0009536,GO:0031897,GO:0009706,GO:0005623,GO:0005622,GO:0008320,GO:0005515,GO:0045037,GO:0016021,GO:0009507
dubium	female-biased	OG0011035	AT4G18830	ID=AT4G18830;Name=AT4G18830;Note=ovate family protein 5;curator_summary=Member of the ovate protein family.Interacts with BLH1 and KNAT3. Regulates the subcellular localization of BLH1.;symbol=OFP5;Alias=ATOFP5;full_name=ovate family protein 5;computational_description=ovate family protein 5 (OFP5)%3B CONTAINS InterPro DOMAIN/s: Protein of unknown function DUF623 (InterPro:IPR006458)%3B BEST Arab…	GO:0030863,GO:0009553,GO:0005634,GO:0045892,GO:0005730
dubium	female-biased	OG0011190	AT3G44020	ID=AT3G44020;Name=AT3G44020;Note=thylakoid lumenal P17.1 protein;computational_description=thylakoid lumenal P17.1 protein%3B Has 71 Blast hits to 71 proteins in 23 species: Archae - 0%3B Bacteria - 4%3B Metazoa - 0%3B Fungi - 0%3B Plants - 53%3B Viruses - 0%3B Other Eukaryotes - 14 (source: NCBI BLink).;Dbxref=PMID:11719511,PMID:14576160,PMID:16915354,locus:2097164;locus_type=protein_coding	GO:0016021,GO:0009507
dubium	female-biased	OG0011230
dubium	female-biased	OG0011383	AT1G30380	ID=AT1G30380;Name=AT1G30380;Note=photosystem I subunit K;curator_summary=Encodes subunit K of photosystem I reaction center.;symbol=PSAK;full_name=photosystem I subunit K;computational_description=photosystem I subunit K (PSAK)%3B FUNCTIONS IN: molecular_function unknown%3B INVOLVED IN: photosynthesis%3B LOCATED IN: thylakoid%2C chloroplast thylakoid membrane%2C photosystem I%2C chloroplast%2C me…	GO:0009535,GO:0009534,GO:0009522,GO:0016021,GO:0009579,GO:0005634,GO:0015979,GO:0009507
dubium	female-biased	OG0011480	AT2G14830	ID=AT2G14830;Name=AT2G14830;Note=Ist1p;computational_description=Regulator of Vps4 activity in the MVB pathway protein%3B CONTAINS InterPro DOMAIN/s: Protein of unknown function DUF292%2C eukaryotic (InterPro:IPR005061)%3B BEST Arabidopsis thaliana protein match is: Regulator of Vps4 activity in the MVB pathway protein (TAIR:AT1G51900.1)%3B Has 750 Blast hits to 708 proteins in 146 species: Archa…	GO:0005634
dubium	female-biased	OG0011632	AT3G18870	ID=AT3G18870;Name=AT3G18870;Note=Mitochondrial transcription termination factor family protein;computational_description=Mitochondrial transcription termination factor family protein%3B FUNCTIONS IN: molecular_function unknown%3B INVOLVED IN: biological_process unknown%3B LOCATED IN: chloroplast%3B EXPRESSED IN: 8 plant structures%3B EXPRESSED DURING: LP.04 four leaves visible%2C LP.10 ten leaves…	GO:0032502,GO:0071472,GO:0009658,GO:0006355,GO:0042646,GO:0003690,GO:0009507
dubium	female-biased	OG0011680	ATCG00600	ID=ATCG00600;Note=PETG;Name=ATCG00600;curator_summary=Cytochrome b6-f complex%2C subunit V. Disruption of homologous gene in Chlamydomonas results in disruption of cytochrome b6-f complex.;symbol=PETG;computational_description=PETG%3B CONTAINS InterPro DOMAIN/s: Cytochrome b6/f complex%2C subunit 5 (InterPro:IPR003683).;Dbxref=PMID:15032878,PMID:18650403,PMID:18682547,locus:504954683;locus_type=p…	GO:0009535,GO:0016021,GO:0009512,GO:0009767,GO:0015979,GO:0009507
dubium	female-biased	OG0011762	AT5G45690	ID=AT5G45690;Name=AT5G45690;Note=histone acetyltransferase (DUF1264);computational_description=Protein of unknown function (DUF1264)%3B FUNCTIONS IN: molecular_function unknown%3B INVOLVED IN: biological_process unknown%3B LOCATED IN: cellular_component unknown%3B EXPRESSED IN: seed%2C leaf%3B EXPRESSED DURING: seedling growth%3B CONTAINS InterPro DOMAIN/s: Protein of unknown function DUF1264 (In…	GO:0008150,GO:0005634,GO:0003674
dubium	female-biased	OG0011873	AT5G62360	ID=AT5G62360;Name=AT5G62360;Note=Plant invertase/pectin methylesterase inhibitor superfamily protein;computational_description=Plant invertase/pectin methylesterase inhibitor superfamily protein%3B FUNCTIONS IN: enzyme inhibitor activity%2C pectinesterase inhibitor activity%2C pectinesterase activity%3B INVOLVED IN: biological_process unknown%3B LOCATED IN: cellular_component unknown%3B EXPRESSED…	GO:0005737,GO:0009827,GO:0004857,GO:0043086,GO:0005886
dubium	female-biased	OG0011947	ATMG00980	ID=ATMG00980;Note=Ribosomal protein S12/S23 family protein;Name=ATMG00980;curator_summary=ribosomal protein L2;symbol=RPSL2;computational_description=RPSL2%3B FUNCTIONS IN: structural constituent of ribosome%3B INVOLVED IN: translation%3B LOCATED IN: mitochondrial large ribosomal subunit%3B CONTAINS InterPro DOMAIN/s: Ribosomal protein S12/S23 (InterPro:IPR006032)%2C Nucleic acid-binding%2C OB-fo…	GO:0015935,GO:0005739,GO:0003735,GO:0005840,GO:0005762,GO:0006412,GO:0009507
dubium	female-biased	OG0012041	AT4G24700	ID=AT4G24700;Name=AT4G24700;Note=hypothetical protein;computational_description=unknown protein%3B Has 20 Blast hits to 20 proteins in 7 species: Archae - 0%3B Bacteria - 0%3B Metazoa - 0%3B Fungi - 0%3B Plants - 20%3B Viruses - 0%3B Other Eukaryotes - 0 (source: NCBI BLink).;Dbxref=PMID:18650403,PMID:18989364,locus:2121919;locus_type=protein_coding	GO:0005575,GO:0003674,GO:0008150
dubium	female-biased	OG0012174	AT1G35420	ID=AT1G35420;Name=AT1G35420;Note=alpha/beta-Hydrolases superfamily protein;computational_description=alpha/beta-Hydrolases superfamily protein%3B FUNCTIONS IN: hydrolase activity%3B INVOLVED IN: biological_process unknown%3B LOCATED IN: chloroplast%2C chloroplast stroma%3B EXPRESSED IN: 22 plant structures%3B EXPRESSED DURING: 13 growth stages%3B CONTAINS InterPro DOMAIN/s: Dienelactone hydrolase…	GO:0009570,GO:0016787,GO:0005737,GO:0009507
dubium	female-biased	OG0012186	ATCG01130	ID=ATCG01130;Note=Ycf1 protein;Name=ATCG01130;symbol=YCF1.2;computational_description=YCF1.2%3B FUNCTIONS IN: protein binding%3B LOCATED IN: chloroplast%2C membrane%3B EXPRESSED IN: cultured cell%2C leaf%3B CONTAINS InterPro DOMAIN/s: Ycf1 (InterPro:IPR008896)%3B BEST Arabidopsis thaliana protein match is: Ycf1 protein (TAIR:ATCG01000.1).;Dbxref=PMID:17432890,PMID:18650403,PMID:18682547,PMID:2337…	GO:0009941,GO:0009536,GO:0031897,GO:0009706,GO:0005623,GO:0005622,GO:0008320,GO:0005515,GO:0045037,GO:0016021,GO:0009507
dubium	female-biased	OG0012262
dubium	female-biased	OG0012305
dubium	female-biased	OG0012362	ATCG01130	ID=ATCG01130;Note=Ycf1 protein;Name=ATCG01130;symbol=YCF1.2;computational_description=YCF1.2%3B FUNCTIONS IN: protein binding%3B LOCATED IN: chloroplast%2C membrane%3B EXPRESSED IN: cultured cell%2C leaf%3B CONTAINS InterPro DOMAIN/s: Ycf1 (InterPro:IPR008896)%3B BEST Arabidopsis thaliana protein match is: Ycf1 protein (TAIR:ATCG01000.1).;Dbxref=PMID:17432890,PMID:18650403,PMID:18682547,PMID:2337…	GO:0009941,GO:0009536,GO:0031897,GO:0009706,GO:0005623,GO:0005622,GO:0008320,GO:0005515,GO:0045037,GO:0016021,GO:0009507
dubium	female-biased	OG0012368
dubium	female-biased	OG0012507	ATCG00640	ID=ATCG00640;Note=ribosomal protein L33;Name=ATCG00640;curator_summary=encodes a chloroplast ribosomal protein L33%2C a constituent of the large subunit of the ribosomal complex;symbol=RPL33;full_name=ribosomal protein L33;computational_description=ribosomal protein L33 (RPL33)%3B FUNCTIONS IN: structural constituent of ribosome%3B INVOLVED IN: translation%3B LOCATED IN: plastid large ribosomal s…	GO:0009536,GO:0005840,GO:0000311,GO:0003735,GO:0006412,GO:0009507
dubium	female-biased	OG0012758	AT4G13500	ID=AT4G13500;Name=AT4G13500;Note=transmembrane protein;computational_description=unknown protein%3B FUNCTIONS IN: molecular_function unknown%3B INVOLVED IN: biological_process unknown%3B LOCATED IN: chloroplast%3B BEST Arabidopsis thaliana protein match is: unknown protein (TAIR:AT2G05310.1)%3B Has 50 Blast hits to 50 proteins in 20 species: Archae - 0%3B Bacteria - 0%3B Metazoa - 0%3B Fungi - 0%…	GO:0009534,GO:0016021,GO:0008150,GO:0003674,GO:0005829,GO:0009507
dubium	female-biased	OG0013230
dubium	female-biased	OG0013328	AT3G14420	ID=AT3G14420;Name=AT3G14420;Note=Aldolase-type TIM barrel family protein;curator_summary=Encodes a glycolate oxidase that modulates reactive oxygen species-mediated signal transduction during nonhost resistance.;symbol=GOX1;full_name=glycolate oxidase 1;computational_description=Aldolase-type TIM barrel family protein%3B FUNCTIONS IN: glycolate oxidase activity%3B INVOLVED IN: oxidation reduction…	GO:0005737,GO:0022626,GO:0005829,GO:0050665,GO:0019516,GO:0005777,GO:0052854,GO:0008891,GO:0009570,GO:0052853,GO:0048046,GO:0042742,GO:0009854,GO:0010181,GO:0004459,GO:0052852,GO:0005634,GO:0009506,GO:0009507
dubium	female-biased	OG0013943
dubium	female-biased	OG0014033	AT4G15530	ID=AT4G15530;Name=AT4G15530;Note=pyruvate orthophosphate dikinase;curator_summary=The product of this long transcript was shown to be targeted to the chloroplast%2C whereas the shorter transcript (no targeting sequence) accumulates in the cytosol. They were also found in slightly different tissues.;symbol=PPDK;full_name=pyruvate orthophosphate dikinase;computational_description=pyruvate orthophos…	GO:0046872,GO:0009570,GO:0005829,GO:0016301,GO:0015979,GO:0050242,GO:0016310,GO:0006090,GO:0005634,GO:0005524,GO:0009507
dubium	female-biased	OG0014196	AT1G43670	ID=AT1G43670;Name=AT1G43670;Note=Inositol monophosphatase family protein;curator_summary=Encodes a fructose-1%2C6-bisphosphatase. This enzyme%2C in addition to catalyzing the formation of fructose-6-phosphate for sucrose biosynthesis%2C appears to play a role in fructose-mediated signaling that is independent of its enzymatic activity. atcfbp-1/fins1 mutants have reduced photosynthetic rates%2C e…	GO:0005737,GO:0042132,GO:0009737,GO:0009750,GO:0016311,GO:0005829,GO:0005983,GO:0005986,GO:0015979,GO:0030388,GO:0046872,GO:0006000,GO:0005634,GO:0006002,GO:0006094
dubium	female-biased	OG0014450	ATCG00780	ID=ATCG00780;Note=ribosomal protein L14;Name=ATCG00780;curator_summary=encodes a chloroplast ribosomal protein L14%2C a constituent of the large subunit of the ribosomal complex;symbol=RPL14;full_name=ribosomal protein L14;computational_description=ribosomal protein L14 (RPL14)%3B FUNCTIONS IN: structural constituent of ribosome%3B INVOLVED IN: translation%3B LOCATED IN: plastid large ribosomal s…	GO:0070180,GO:0009534,GO:0009570,GO:0000311,GO:0003735,GO:0005762,GO:0006412,GO:0009507
dubium	female-biased	OG0015407	AT3G55580	ID=AT3G55580;Name=AT3G55580;Note=Regulator of chromosome condensation (RCC1) family protein;computational_description=Regulator of chromosome condensation (RCC1) family protein%3B CONTAINS InterPro DOMAIN/s: Regulator of chromosome condensation/beta-lactamase-inhibitor protein II (InterPro:IPR009091)%2C Regulator of chromosome condensation%2C RCC1 (InterPro:IPR000408)%3B BEST Arabidopsis thaliana…	GO:0005737,GO:0071497,GO:0042393,GO:0005634,GO:0009631,GO:0005515,GO:1901141
dubium	female-biased	OG0015753	AT4G28290	ID=AT4G28290;Name=AT4G28290;Note=hypothetical protein;computational_description=unknown protein%3B FUNCTIONS IN: molecular_function unknown%3B INVOLVED IN: biological_process unknown%3B LOCATED IN: chloroplast%3B EXPRESSED IN: 23 plant structures%3B EXPRESSED DURING: 15 growth stages%3B Has 45 Blast hits to 45 proteins in 11 species: Archae - 0%3B Bacteria - 0%3B Metazoa - 0%3B Fungi - 0%3B Plant…	GO:0003674,GO:0008150,GO:0009507
dubium	female-biased	OG0015940
dubium	female-biased	OG0016010	AT1G62750	ID=AT1G62750;Name=AT1G62750;Note=Translation elongation factor EFG/EF2 protein;curator_summary=Nuclear encoded protein consists of the five domains conserved in EF-G proteins%2C with two GTP-binding sites in the first domain%2C and an additional transit peptide at the N-terminus. Localized in chloroplasts. Point mutation results in a delay in the onset of germination. At early developmental stage…	GO:0009941,GO:0009570,GO:0005634,GO:0005739,GO:0032790,GO:0048046,GO:0009791,GO:0009845,GO:0005524,GO:0009507,GO:0003746,GO:0006414,GO:0009658,GO:0005525
dubium	female-biased	OG0016027	ATCG01130	ID=ATCG01130;Note=Ycf1 protein;Name=ATCG01130;symbol=YCF1.2;computational_description=YCF1.2%3B FUNCTIONS IN: protein binding%3B LOCATED IN: chloroplast%2C membrane%3B EXPRESSED IN: cultured cell%2C leaf%3B CONTAINS InterPro DOMAIN/s: Ycf1 (InterPro:IPR008896)%3B BEST Arabidopsis thaliana protein match is: Ycf1 protein (TAIR:ATCG01000.1).;Dbxref=PMID:17432890,PMID:18650403,PMID:18682547,PMID:2337…	GO:0009941,GO:0009536,GO:0031897,GO:0009706,GO:0005623,GO:0005622,GO:0008320,GO:0005515,GO:0045037,GO:0016021,GO:0009507
dubium	female-biased	OG0018774	AT2G39260	ID=AT2G39260;Name=AT2G39260;Note=regulator of nonsense transcripts UPF2;computational_description=binding%3BRNA binding%3B FUNCTIONS IN: RNA binding%2C binding%3B INVOLVED IN: translation%2C RNA metabolic process%3B LOCATED IN: cellular_component unknown%3B EXPRESSED IN: 23 plant structures%3B EXPRESSED DURING: 13 growth stages%3B CONTAINS InterPro DOMAIN/s: Armadillo-type fold (InterPro:IPR01602…	GO:0005737,GO:0005844,GO:0035145,GO:0000184,GO:0003729
dubium	female-biased	OG0018952	AT1G15950	ID=AT1G15950;Name=AT1G15950;Note=cinnamoyl coa reductase 1;curator_summary=Encodes a cinnamoyl CoA reductase. Involved in lignin biosynthesis.;symbol=CCR1;Alias=ATCCR1,IRX4,IRREGULAR XYLEM 4;full_name=cinnamoyl coa reductase 1;computational_description=cinnamoyl coa reductase 1 (CCR1)%3B CONTAINS InterPro DOMAIN/s: NAD-dependent epimerase/dehydratase (InterPro:IPR001509)%2C NAD(P)-binding domain …	GO:0005737,GO:0050662,GO:0009809,GO:0016616,GO:0005829,GO:0016621,GO:0009409,GO:0007623,GO:0055114,GO:0016491
dubium	female-biased	OG0019040
dubium	female-biased	OG0019248	AT2G16570	ID=AT2G16570;Name=AT2G16570;Note=GLN phosphoribosyl pyrophosphate amidotransferase 1;curator_summary=Amidophosphoribosyltransferase (ATase: EC 2.4.2.14) is a key enzyme in the pathway of purine nucleotide biosynthesis;symbol=ASE1;Alias=ATASE,ATASE1,GLN phosphoribosyl pyrophosphate amidotransferase 1;full_name=GLN phosphoribosyl pyrophosphate amidotransferase 1;computational_description=GLN phosph…	GO:0004044,GO:0009536,GO:0009532,GO:0005618,GO:0009570,GO:0005829,GO:0006541,GO:0009113,GO:0006189,GO:0009116,GO:0046872,GO:0051536,GO:0009507
dubium	female-biased	OG0019293	AT3G55620	ID=AT3G55620;Name=AT3G55620;Note=Translation initiation factor IF6;symbol=eIF6A;Alias=emb1624,embryo defective 1624;full_name=eukaryotic initiation facor 6A;computational_description=embryo defective 1624 (emb1624)%3B FUNCTIONS IN: ribosome binding%2C translation initiation factor activity%3B INVOLVED IN: translational initiation%2C embryo development ending in seed dormancy%3B LOCATED IN: nucleo…	GO:0000460,GO:0005730,GO:0005829,GO:0030687,GO:0005634,GO:0000054,GO:1902626,GO:0009793,GO:0000470,GO:0071215,GO:0043022,GO:0043023
dubium	female-biased	OG0019666	AT1G62750	ID=AT1G62750;Name=AT1G62750;Note=Translation elongation factor EFG/EF2 protein;curator_summary=Nuclear encoded protein consists of the five domains conserved in EF-G proteins%2C with two GTP-binding sites in the first domain%2C and an additional transit peptide at the N-terminus. Localized in chloroplasts. Point mutation results in a delay in the onset of germination. At early developmental stage…	GO:0009941,GO:0009570,GO:0005634,GO:0005739,GO:0032790,GO:0048046,GO:0009791,GO:0009845,GO:0005524,GO:0009507,GO:0003746,GO:0006414,GO:0009658,GO:0005525
ericifolium	male-biased	OG0000461	ATMG00513	ID=ATMG00513;Note=NADH dehydrogenase 5A;Name=ATMG00513;curator_summary=Mitochondrial NADH dehydrogenase subunit 5. The gene is trans-spliced from three different pre-cursors%2C NAD5a%2C NAD5b and NAD5c.;symbol=NAD5A;Alias=NAD5.1,NADH DEHYDROGENASE 5.1,NAD5,NADH DEHYDROGENASE SUBUNIT 5;full_name=NADH dehydrogenase 5A;computational_description=NADH dehydrogenase 5A (NAD5A)%3B CONTAINS InterPro DOMA…	GO:0008137,GO:0016021,GO:0005739,GO:0042773,GO:0005743,GO:0045333,GO:0005747,GO:0070469,GO:0003954,GO:0055114
ericifolium	male-biased	OG0001040	AT2G28630	ID=AT2G28630;Name=AT2G28630;Note=3-ketoacyl-CoA synthase 12;curator_summary=Encodes KCS12%2C a member of the 3-ketoacyl-CoA synthase family involved in the biosynthesis of VLCFA (very long chain fatty acids).;symbol=KCS12;full_name=3-ketoacyl-CoA synthase 12;computational_description=3-ketoacyl-CoA synthase 12 (KCS12)%3B FUNCTIONS IN: transferase activity%2C transferring acyl groups other than am…	GO:0006633,GO:0005783,GO:0016020,GO:0102337,GO:0102336,GO:0102338,GO:0102756,GO:0009507
ericifolium	male-biased	OG0001072	AT2G41370	ID=AT2G41370;Name=AT2G41370;Note=Ankyrin repeat family protein / BTB/POZ domain-containing protein;curator_summary=Encodes BOP2%2C a cytoplasmic and nuclear-localized NPR1 like protein with BTB/POZ domain and ankyrin repeats. Interacts with BOP1 and appears to be genetically redundant with BOP1.bop1/bop2 double mutants have longer leaves%2C often with leaflets on the petiole%2C asymmetric flowers…	GO:0010582,GO:0044212,GO:0009954,GO:0009944,GO:0005634,GO:0005737,GO:0010254,GO:0009864,GO:0016567,GO:0048439,GO:0005515,GO:0010227,GO:0010434
ericifolium	male-biased	OG0012108	AT1G70520	ID=AT1G70520;Name=AT1G70520;Note=cysteine-rich RLK (RECEPTOR-like protein kinase) 2;curator_summary=Encodes a cysteine-rich receptor-like protein kinase.;symbol=CRK2;Alias=ASG6,ALTERED SEED GERMINATION 6;full_name=cysteine-rich RLK (RECEPTOR-like protein kinase) 2;computational_description=cysteine-rich RLK (RECEPTOR-like protein kinase) 2 (CRK2)%3B FUNCTIONS IN: kinase activity%3B INVOLVED IN: r…	GO:0005515,GO:0016021,GO:0016301,GO:0004674,GO:0005524,GO:0010193,GO:0005886,GO:0046777,GO:0009506
ericifolium	male-biased	OG0012250	AT3G52560	ID=AT3G52560;Name=AT3G52560;Note=ubiquitin E2 variant 1D-4;curator_summary=MMZ4/UEV1D encodes a protein that may play a role in DNA damage responses and error-free post-replicative DNA repair by participating in lysine-63-based polyubiquitination reactions. UEV1D can form diubiquitin and triubiquitin chains in combination with UBC13A/UBC35 in vitro. It can also functionally complement an mms2 mut…	GO:0070534,GO:0006301,GO:0005829,GO:0061631,GO:0006974,GO:0005515,GO:0004842,GO:0005634,GO:0031372
ericifolium	male-biased	OG0016094	AT2G35340	ID=AT2G35340;Name=AT2G35340;Note=helicase domain-containing protein;symbol=MEE29;full_name=maternal effect embryo arrest 29;computational_description=maternal effect embryo arrest 29 (MEE29)%3B FUNCTIONS IN: helicase activity%2C ATP-dependent RNA helicase activity%2C ATP binding%2C ATP-dependent helicase activity%2C nucleic acid binding%3B INVOLVED IN: embryo development ending in seed dormancy%3…	GO:0009793,GO:0005634,GO:0003723,GO:0005681,GO:0005622
ericifolium	male-biased	OG0020197	AT3G15353	ID=AT3G15353;Name=AT3G15353;Note=metallothionein 3;curator_summary=metallothionein%2C binds to and detoxifies excess copper and other metals%2C limiting oxidative damage;symbol=MT3;Alias=ATMT3;full_name=metallothionein 3;computational_description=metallothionein 3 (MT3)%3B Has 268 Blast hits to 268 proteins in 64 species: Archae - 0%3B Bacteria - 0%3B Metazoa - 0%3B Fungi - 0%3B Plants - 268%3B V…	GO:0005623,GO:0005507,GO:0008270,GO:0006878,GO:0005576
ericifolium	female-biased	OG0001220	AT5G42800	ID=AT5G42800;Name=AT5G42800;Note=dihydroflavonol 4-reductase;curator_summary=dihydroflavonol reductase. Catalyzes the conversion of dihydroquercetin to leucocyanidin in the biosynthesis of anthocyanins. Not expressed in roots (qRT-PCR).;symbol=DFR;Alias=M318,TT3;full_name=dihydroflavonol 4-reductase;computational_description=dihydroflavonol 4-reductase (DFR)%3B CONTAINS InterPro DOMAIN/s: NAD-dep…	GO:0009718,GO:0042406,GO:0016616,GO:0050662,GO:0047890,GO:0045552,GO:0005515,GO:0055114,GO:0016491
ericifolium	female-biased	OG0011216
ericifolium	female-biased	OG0020150	AT3G24460	ID=AT3G24460;Name=AT3G24460;Note=Serinc-domain containing serine and sphingolipid biosynthesis protein;computational_description=Serinc-domain containing serine and sphingolipid biosynthesis protein%3B LOCATED IN: membrane%3B EXPRESSED IN: 10 plant structures%3B EXPRESSED DURING: LP.06 six leaves visible%2C LP.04 four leaves visible%2C 4 anthesis%2C petal differentiation and expansion stage%3B CO…	GO:0016021,GO:0016020
linifolium	male-biased	OG0000115	AT1G67090	ID=AT1G67090;Name=AT1G67090;Note=ribulose bisphosphate carboxylase small chain 1A;curator_summary=Encodes a member of the Rubisco small subunit (RBCS) multigene family: RBCS1A (At1g67090)%2C RBCS1B (At5g38430)%2C RBCS2B (At5g38420)%2C and RBCS3B (At5g38410). Functions to yield sufficient Rubisco content for leaf photosynthetic capacity.;symbol=RBCS1A;full_name=ribulose bisphosphate carboxylase sm…	GO:0004497,GO:0022626,GO:0031977,GO:0048046,GO:0005739,GO:0015979,GO:0009535,GO:0009941,GO:0009570,GO:0009637,GO:0010218,GO:0005507,GO:0019253,GO:0110102,GO:0031969,GO:0009579,GO:0009409,GO:0010114,GO:0055114,GO:0009507,GO:0016984,GO:0009853
linifolium	male-biased	OG0001162	AT1G12330	ID=AT1G12330;Name=AT1G12330;Note=cyclin-dependent kinase-like protein;computational_description=unknown protein%3B INVOLVED IN: biological_process unknown%3B LOCATED IN: chloroplast%3B EXPRESSED IN: 21 plant structures%3B EXPRESSED DURING: 12 growth stages%3B BEST Arabidopsis thaliana protein match is: unknown protein (TAIR:AT5G12900.1)%3B Has 249 Blast hits to 249 proteins in 27 species: Archae …	GO:0016310,GO:0016301,GO:0009507
linifolium	male-biased	OG0002574	AT3G60160	ID=AT3G60160;Name=AT3G60160;Note=multidrug resistance-associated protein 9;curator_summary=member of MRP subfamily;symbol=ABCC9;Alias=ATMRP9,multidrug resistance-associated protein 9,MRP9,multidrug resistance-associated protein 9;full_name=ATP-binding cassette C9;computational_description=multidrug resistance-associated protein 9 (MRP9)%3B FUNCTIONS IN: ATPase activity%2C coupled to transmembrane…	GO:0000325,GO:0042626,GO:0016021,GO:0016020,GO:0009624,GO:0005774,GO:0008559,GO:0009506,GO:0016887,GO:0055085,GO:0005524,GO:0009507
linifolium	male-biased	OG0012324	AT1G48830	ID=AT1G48830;Name=AT1G48830;Note=Ribosomal protein S7e family protein;computational_description=Ribosomal protein S7e family protein%3B FUNCTIONS IN: structural constituent of ribosome%3B INVOLVED IN: translation%3B LOCATED IN: cytosolic small ribosomal subunit%2C cytosolic ribosome%2C cell wall%2C plasma membrane%2C chloroplast%3B EXPRESSED IN: 23 plant structures%3B EXPRESSED DURING: 13 growth …	GO:0032040,GO:0022626,GO:0022627,GO:0042274,GO:0005618,GO:0005634,GO:0006412,GO:0006364,GO:0005886,GO:0005829,GO:0003729
linifolium	male-biased	OG0012939	AT5G19440	ID=AT5G19440;Name=AT5G19440;Note=NAD(P)-binding Rossmann-fold superfamily protein;curator_summary=similar to Eucalyptus gunnii alcohol dehydrogenase of unknown physiological function (GI:1143445)%2C apple tree%2C PIR:T16995%3B NOT a cinnamyl-alcohol dehydrogenase;computational_description=NAD(P)-binding Rossmann-fold superfamily protein%3B FUNCTIONS IN: alcohol dehydrogenase (NAD) activity%3B INV…	GO:0050662,GO:0009536,GO:0016616,GO:0005794,GO:0005829,GO:0004022,GO:0005886,GO:0009506,GO:0016491
linifolium	male-biased	OG0021578
linifolium	male-biased	OG0021866	AT2G15240	ID=AT2G15240;Name=AT2G15240;Note=UNC-50 family protein;computational_description=UNC-50 family protein%3B CONTAINS InterPro DOMAIN/s: UNC-50 (InterPro:IPR007881)%3B Has 331 Blast hits to 331 proteins in 162 species: Archae - 0%3B Bacteria - 0%3B Metazoa - 153%3B Fungi - 93%3B Plants - 47%3B Viruses - 0%3B Other Eukaryotes - 38 (source: NCBI BLink).;Dbxref=PMID:15141064,PMID:16972165,PMID:18775970…	GO:0005797,GO:0006810,GO:0003674,GO:0005634,GO:0030173
linifolium	female-biased	OG0000076	AT2G18060	ID=AT2G18060;Name=AT2G18060;Note=vascular related NAC-domain protein 1;curator_summary=Encodes a NAC-domain transcription factor that is expressed in developing vessels and protoxylem. Along with other members of this family%2C VND1 appears to regulate the development of genes required for secondary cell wall biosynthesis.;symbol=VND1;Alias=ANAC037,Arabidopsis NAC domain containing protein 37;ful…	GO:0044212,GO:0048759,GO:0010200,GO:0071555,GO:0003700,GO:0005634,GO:1990110,GO:0043565,GO:0006355,GO:0005515,GO:1901348,GO:0007275
linifolium	female-biased	OG0000097
linifolium	female-biased	OG0000529	AT3G19000	ID=AT3G19000;Name=AT3G19000;Note=2-oxoglutarate (2OG) and Fe(II)-dependent oxygenase superfamily protein;computational_description=2-oxoglutarate (2OG) and Fe(II)-dependent oxygenase superfamily protein%3B FUNCTIONS IN: oxidoreductase activity%2C acting on paired donors%2C with incorporation or reduction of molecular oxygen%2C 2-oxoglutarate as one donor%2C and incorporation of one atom each of o…	GO:0005737,GO:0046872,GO:0051213,GO:0055114
linifolium	female-biased	OG0000761	AT2G45130	ID=AT2G45130;Name=AT2G45130;Note=SPX domain protein 3;curator_summary=Expression is upregulated in the shoot of cax1/cax3 mutant.;symbol=SPX3;Alias=ATSPX3,ARABIDOPSIS THALIANA SPX DOMAIN GENE 3;full_name=SPX domain gene 3;computational_description=SPX domain gene 3 (SPX3)%3B CONTAINS InterPro DOMAIN/s: SPX%2C N-terminal (InterPro:IPR004331)%3B BEST Arabidopsis thaliana protein match is: SPX domai…	GO:0005737,GO:0080040,GO:0016036
linifolium	female-biased	OG0002006	AT4G39410	ID=AT4G39410;Name=AT4G39410;Note=WRKY DNA-binding protein 13;curator_summary=member of WRKY Transcription Factor%3B Group II-c;symbol=WRKY13;Alias=ATWRKY13,ARABIDOPSIS THALIANA WRKY DNA-BINDING PROTEIN 13;full_name=WRKY DNA-binding protein 13;computational_description=WRKY DNA-binding protein 13 (WRKY13)%3B FUNCTIONS IN: sequence-specific DNA binding transcription factor activity%3B INVOLVED IN: …	GO:1904369,GO:0044212,GO:0003700,GO:0005634,GO:0045893,GO:0000978,GO:1901141
linifolium	female-biased	OG0003401	AT5G18830	ID=AT5G18830;Name=AT5G18830;Note=squamosa promoter binding protein-like 7;curator_summary=Encodes a member of the Squamosa Binding Protein family of transcriptional regulators. SPL7 is expressed highly in roots and appears to play a role in copper homeostasis. Mutants are hypersensitive to copper deficient conditions and display a retarded growth phenotype. SPL7 binds to the promoter of the coppe…	GO:0016607,GO:0044212,GO:0043565,GO:0003700,GO:0005634,GO:0035874,GO:0048638,GO:0006355,GO:0055070,GO:0005515,GO:0003677,GO:0046872,GO:0042803
linifolium	female-biased	OG0004331	AT4G17870	ID=AT4G17870;Name=AT4G17870;Note=Polyketide cyclase/dehydrase and lipid transport superfamily protein;curator_summary=Encodes a member of the PYR (pyrabactin resistance )/PYL(PYR1-like)/RCAR (regulatory components of ABA receptor) family proteins with 14 members. PYR/PYL/RCAR family proteins function as abscisic acid sensors. Mediate ABA-dependent regulation of protein phosphatase 2Cs ABI1 and AB…	GO:0005737,GO:0038023,GO:0005634,GO:0009738,GO:0080163,GO:0004864,GO:0010427,GO:0005515,GO:0005886,GO:0042803,GO:0005829,GO:0042802,GO:1902584
linifolium	female-biased	OG0005887	AT5G55160	ID=AT5G55160;Name=AT5G55160;Note=small ubiquitin-like modifier 2;curator_summary=Encodes a small ubiquitin-like modifier (SUMO) polypeptide that becomes covalently attached to various intracellular protein targets%2C much like ubiquitination%2C leading to post-translational modification of those targets. SUMO2 can form SUMO chains through lysine residue 10 during in vitro assays.;symbol=SUMO2;Ali…	GO:0005737,GO:0009536,GO:0044389,GO:0031386,GO:0005634,GO:0005515,GO:0009408,GO:0016925,GO:0005829
linifolium	female-biased	OG0010148	AT4G25200	ID=AT4G25200;Name=AT4G25200;Note=mitochondrion-localized small heat shock protein 23.6;curator_summary=AtHSP23.6-mito mRNA%2C nuclear gene encoding mitochondrial;symbol=HSP23.6-MITO;Alias=ATHSP23.6-MITO,mitochondrion-localized small heat shock protein 23.6;full_name=mitochondrion-localized small heat shock protein 23.6;computational_description=mitochondrion-localized small heat shock protein 23.…	GO:0046686,GO:0003674,GO:0005739,GO:0009507
linifolium	female-biased	OG0011071	AT4G13450	ID=AT4G13450;Name=AT4G13450;Note=Adenine nucleotide alpha hydrolases-like superfamily protein;computational_description=Adenine nucleotide alpha hydrolases-like superfamily protein%3B BEST Arabidopsis thaliana protein match is: Adenine nucleotide alpha hydrolases-like superfamily protein (TAIR:AT2G03720.1)%3B Has 132 Blast hits to 132 proteins in 13 species: Archae - 0%3B Bacteria - 0%3B Metazoa …	GO:0016787,GO:0005739
linifolium	female-biased	OG0011593	AT4G10310	ID=AT4G10310;Name=AT4G10310;Note=high-affinity K+ transporter 1;curator_summary=encodes a sodium transporter (HKT1) expressed in xylem parenchyma cells. Mutants over-accumulate sodium in shoot tissue and have increased sodium in the xylem sap and reduced sodium in phloem sap and roots.;symbol=HKT1;Alias=ATHKT1;full_name=high-affinity K+ transporter 1;computational_description=high-affinity K+ tra…	GO:0015081,GO:0071805,GO:0006813,GO:0016021,GO:0008324,GO:0005739,GO:0006814,GO:0006970,GO:0005886,GO:0009651,GO:0015079
linifolium	female-biased	OG0011839	AT3G29130	ID=AT3G29130;Name=AT3G29130;Note=kxDL motif protein;computational_description=CONTAINS InterPro DOMAIN/s: Domain of unknown function KxDL (InterPro:IPR019371)%3B Has 135 Blast hits to 135 proteins in 54 species: Archae - 0%3B Bacteria - 0%3B Metazoa - 106%3B Fungi - 0%3B Plants - 26%3B Viruses - 0%3B Other Eukaryotes - 3 (source: NCBI BLink).;Dbxref=locus:2094637;locus_type=protein_coding	GO:0008150,GO:0005634,GO:0003674,GO:0005739
linifolium	female-biased	OG0016694
linifolium	female-biased	OG0021796	AT3G06895	ID=AT3G06895;Name=AT3G06895;Note=syntaxin KNOLLE-like protein;computational_description=unknown protein%3B Has 2 Blast hits to 2 proteins in 1 species: Archae - 0%3B Bacteria - 0%3B Metazoa - 0%3B Fungi - 0%3B Plants - 2%3B Viruses - 0%3B Other Eukaryotes - 0 (source: NCBI BLink).;Dbxref=PMID:18650403,locus:2828537;locus_type=protein_coding	GO:0003674,GO:0008150
linifolium	female-biased	OG0022058	AT3G15353	ID=AT3G15353;Name=AT3G15353;Note=metallothionein 3;curator_summary=metallothionein%2C binds to and detoxifies excess copper and other metals%2C limiting oxidative damage;symbol=MT3;Alias=ATMT3;full_name=metallothionein 3;computational_description=metallothionein 3 (MT3)%3B Has 268 Blast hits to 268 proteins in 64 species: Archae - 0%3B Bacteria - 0%3B Metazoa - 0%3B Fungi - 0%3B Plants - 268%3B V…	GO:0005623,GO:0005507,GO:0008270,GO:0006878,GO:0005576
linifolium	female-biased	OG0022099	AT2G34430	ID=AT2G34430;Name=AT2G34430;Note=light-harvesting chlorophyll-protein complex II subunit B1;curator_summary=Photosystem II type I chlorophyll a/b-binding protein;symbol=LHB1B1;Alias=LHCB1.4,LIGHT-HARVESTING CHLOROPHYLL-PROTEIN COMPLEX II SUBUNIT B1;full_name=light-harvesting chlorophyll-protein complex II subunit B1;computational_description=light-harvesting chlorophyll-protein complex II subunit…	GO:0009535,GO:0009941,GO:0016168,GO:0016021,GO:0009522,GO:0009523,GO:0009534,GO:0010287,GO:0018298,GO:0009768,GO:0009769,GO:0009416,GO:0005783,GO:0009579,GO:0042651,GO:0015979,GO:0009507
muirii	male-biased	OG0000720	AT1G09850	ID=AT1G09850;Name=AT1G09850;Note=xylem bark cysteine peptidase 3;curator_summary=Arabidopsis thaliana papain-like cysteine peptidase;symbol=XBCP3;full_name=xylem bark cysteine peptidase 3;computational_description=xylem bark cysteine peptidase 3 (XBCP3)%3B FUNCTIONS IN: cysteine-type endopeptidase activity%2C cysteine-type peptidase activity%3B INVOLVED IN: proteolysis%3B LOCATED IN: vacuole%3B E…	GO:0051603,GO:0005615,GO:0005773,GO:0005764,GO:0004197,GO:0005783,GO:0005576
muirii	male-biased	OG0001072	AT2G41370	ID=AT2G41370;Name=AT2G41370;Note=Ankyrin repeat family protein / BTB/POZ domain-containing protein;curator_summary=Encodes BOP2%2C a cytoplasmic and nuclear-localized NPR1 like protein with BTB/POZ domain and ankyrin repeats. Interacts with BOP1 and appears to be genetically redundant with BOP1.bop1/bop2 double mutants have longer leaves%2C often with leaflets on the petiole%2C asymmetric flowers…	GO:0010582,GO:0044212,GO:0009954,GO:0009944,GO:0005634,GO:0005737,GO:0010254,GO:0009864,GO:0016567,GO:0048439,GO:0005515,GO:0010227,GO:0010434
muirii	male-biased	OG0001906	AT4G35190	ID=AT4G35190;Name=AT4G35190;Note=Putative lysine decarboxylase family protein;symbol=LOG5;full_name=LONELY GUY 5;computational_description=Putative lysine decarboxylase family protein%3B CONTAINS InterPro DOMAIN/s: Conserved hypothetical protein CHP00730 (InterPro:IPR005269)%3B BEST Arabidopsis thaliana protein match is: lysine decarboxylase family protein (TAIR:AT2G37210.1)%3B Has 30201 Blast hi…	GO:0005829,GO:0005634,GO:0016799,GO:0009691
muirii	male-biased	OG0002194	AT4G33985	ID=AT4G33985;Name=AT4G33985;Note=membrane insertase%2C putative (DUF1685);computational_description=Protein of unknown function (DUF1685)%3B FUNCTIONS IN: molecular_function unknown%3B INVOLVED IN: biological_process unknown%3B EXPRESSED IN: 11 plant structures%3B EXPRESSED DURING: 6 growth stages%3B CONTAINS InterPro DOMAIN/s: Protein of unknown function DUF1685 (InterPro:IPR012881)%3B BEST Arab…	GO:0008150,GO:0005634,GO:0003674
muirii	male-biased	OG0002609	AT4G11600	ID=AT4G11600;Name=AT4G11600;Note=glutathione peroxidase 6;curator_summary=Encodes glutathione peroxidase.;symbol=GPX6;Alias=ATGPX6,glutathione peroxidase 6,LSC803,PHGPX;full_name=glutathione peroxidase 6;computational_description=glutathione peroxidase 6 (GPX6)%3B FUNCTIONS IN: glutathione peroxidase activity%3B INVOLVED IN: response to oxidative stress%2C response to cadmium ion%2C response to s…	GO:0005829,GO:0005739,GO:0006979,GO:0098869,GO:0055114,GO:0005886,GO:0046686,GO:0047066,GO:0004601,GO:0004602,GO:0009507
muirii	male-biased	OG0003068	AT1G56010	ID=AT1G56010;Name=AT1G56010;Note=NAC domain containing protein 1;curator_summary=Encodes a transcription factor involved in shoot apical meristem formation and auxin-mediated lateral root formation. The gene is thought not to be involved in stress responses (NaCl%2C auxins%2C ethylene). NAC1 (NAC1);symbol=NAC1;Alias=ANAC022,Arabidopsis NAC domain containing protein 22,anac021,Arabidopsis NAC doma…	GO:0010072,GO:0009734,GO:0003700,GO:0005634,GO:0006355,GO:0003677,GO:0048527
muirii	male-biased	OG0005890	AT5G09260	ID=AT5G09260;Name=AT5G09260;Note=vacuolar protein sorting-associated protein 20.2;symbol=VPS20.2;full_name=vacuolar protein sorting-associated protein 20.2;computational_description=vacuolar protein sorting-associated protein 20.2 (VPS20.2)%3B INVOLVED IN: vesicle-mediated transport%2C N-terminal protein myristoylation%3B LOCATED IN: ESCRT III complex%2C plasma membrane%3B CONTAINS InterPro DOMAI…	GO:0005737,GO:0016192,GO:0007034,GO:0000815,GO:0005829,GO:0005770,GO:0070676,GO:0005515,GO:0005886,GO:0015031
muirii	male-biased	OG0005912	AT3G51860	ID=AT3G51860;Name=AT3G51860;Note=cation exchanger 3;symbol=CAX3;Alias=ATCAX3,ATHCX1,CAX1-LIKE;full_name=cation exchanger 3;computational_description=cation exchanger 3 (CAX3)%3B CONTAINS InterPro DOMAIN/s: Sodium/calcium exchanger membrane region (InterPro:IPR004837)%2C Calcium/proton exchanger superfamily (InterPro:IPR004798)%2C Calcium/proton exchanger (InterPro:IPR004713)%3B BEST Arabidopsis t…	GO:0051592,GO:0006814,GO:0015491,GO:0005773,GO:0006874,GO:0016021,GO:0070588,GO:0009624,GO:0006882,GO:0005774,GO:0055062,GO:0030026,GO:0005739,GO:0005515,GO:0006793,GO:0015369,GO:0015368,GO:0009705,GO:0010351
muirii	male-biased	OG0009712	AT5G05690	ID=AT5G05690;Name=AT5G05690;Note=Cytochrome P450 superfamily protein;curator_summary=Encodes a member of the CP90A family%2C a cytochrome P450 monooxygenase which converts 6-deoxocathasterone to 6-deoxoteasterone in the late C6 oxidation pathway and cathasterone to teasterone in the early C6 oxidation pathway of brassinolide biosynthesis. Expressed in cotyledons and leaves. Mutants display de-eti…	GO:0009826,GO:0004497,GO:0016125,GO:0016021,GO:0020037,GO:0010584,GO:0016132,GO:0009911,GO:0016705,GO:0005739,GO:0010268,GO:0048657,GO:0005506,GO:0010224,GO:0007275,GO:0055114,GO:0016491
muirii	male-biased	OG0009919	AT5G46680	ID=AT5G46680;Name=AT5G46680;Note=Pentatricopeptide repeat (PPR-like) superfamily protein;computational_description=Pentatricopeptide repeat (PPR-like) superfamily protein%3B CONTAINS InterPro DOMAIN/s: Pentatricopeptide repeat (InterPro:IPR002885)%3B BEST Arabidopsis thaliana protein match is: Pentatricopeptide repeat (PPR-like) superfamily protein (TAIR:AT1G09900.1)%3B Has 30201 Blast hits to 17…	GO:0008150,GO:0003674,GO:0005739
muirii	male-biased	OG0013556	AT3G03780	ID=AT3G03780;Name=AT3G03780;Note=methionine synthase 2;curator_summary=Encodes a cytosolic methionine synthase%2C involved in methionine regeneration via the activated methyl cycle (or SAM cycle);symbol=MS2;Alias=ATMS2,methionine synthase 2;full_name=methionine synthase 2;computational_description=methionine synthase 2 (MS2)%3B FUNCTIONS IN: 5-methyltetrahydropteroyltriglutamate-homocysteine S-me…	GO:0005737,GO:0009941,GO:0009086,GO:0005829,GO:0048046,GO:0005576,GO:0008705,GO:0008270,GO:0005886,GO:0046686,GO:0032259,GO:0003871,GO:0009506,GO:0009507
muirii	female-biased	OG0000150	AT5G13980	ID=AT5G13980;Name=AT5G13980;Note=Glycosyl hydrolase family 38 protein;computational_description=Glycosyl hydrolase family 38 protein%3B FUNCTIONS IN: in 6 functions%3B INVOLVED IN: mannose metabolic process%2C carbohydrate metabolic process%3B LOCATED IN: apoplast%2C cell wall%2C plasma membrane%2C vacuole%2C plant-type cell wall%3B EXPRESSED IN: 25 plant structures%3B EXPRESSED DURING: 13 growth…	GO:0048046,GO:0099503,GO:0005618,GO:0030246,GO:0005774,GO:0006013,GO:0005773,GO:0005576,GO:0006517,GO:0046872,GO:0004559
muirii	female-biased	OG0009145	AT1G68825	ID=AT1G68825;Name=AT1G68825;Note=ROTUNDIFOLIA like 15;symbol=RTFL15;Alias=DVL5,DEVIL 5;full_name=ROTUNDIFOLIA like 15;computational_description=ROTUNDIFOLIA like 15 (RTFL15)%3B CONTAINS InterPro DOMAIN/s: DVL (InterPro:IPR012552)%3B BEST Arabidopsis thaliana protein match is: ROTUNDIFOLIA like 17 (TAIR:AT1G13245.1)%3B Has 101 Blast hits to 101 proteins in 11 species: Archae - 0%3B Bacteria - 0%3B…	GO:0048367,GO:0005739
muirii	female-biased	OG0009664	AT5G58770	ID=AT5G58770;Name=AT5G58770;Note=Undecaprenyl pyrophosphate synthetase family protein;symbol=cPT4;Alias=AtcPT4;full_name=cis-prenyltransferase 4;computational_description=Undecaprenyl pyrophosphate synthetase family protein%3B FUNCTIONS IN: dehydrodolichyl diphosphate synthase activity%3B INVOLVED IN: dolichol biosynthetic process%3B LOCATED IN: chloroplast%3B EXPRESSED IN: 15 plant structures%3B…	GO:0006486,GO:0009570,GO:0009668,GO:0005739,GO:0002094,GO:0016094,GO:0009409,GO:0045547,GO:0019408,GO:0009507
muirii	female-biased	OG0012754	AT2G01460	ID=AT2G01460;Name=AT2G01460;Note=P-loop containing nucleoside triphosphate hydrolases superfamily protein;computational_description=P-loop containing nucleoside triphosphate hydrolases superfamily protein%3B FUNCTIONS IN: nucleoside-triphosphatase activity%2C kinase activity%2C nucleotide binding%2C phosphotransferase activity%2C alcohol group as acceptor%2C ATP binding%3B INVOLVED IN: biosynthet…	GO:0005737,GO:0031307
muirii	female-biased	OG0013150	AT1G26880	ID=AT1G26880;Name=AT1G26880;Note=Ribosomal protein L34e superfamily protein;computational_description=Ribosomal protein L34e superfamily protein%3B FUNCTIONS IN: structural constituent of ribosome%3B INVOLVED IN: translation%2C ribosome biogenesis%3B LOCATED IN: ribosome%2C nucleolus%2C chloroplast%3B EXPRESSED IN: 25 plant structures%3B EXPRESSED DURING: 15 growth stages%3B CONTAINS InterPro DOM…	GO:0005737,GO:0022625,GO:0005634,GO:0005730,GO:0042254,GO:0003735,GO:0006412
muirii	female-biased	OG0022301	AT3G46940	ID=AT3G46940;Name=AT3G46940;Note=DUTP-PYROPHOSPHATASE-LIKE 1;symbol=DUT1;full_name=DUTP-PYROPHOSPHATASE-LIKE 1;computational_description=DUTP-PYROPHOSPHATASE-LIKE 1 (DUT1)%3B FUNCTIONS IN: hydrolase activity%2C dUTP diphosphatase activity%3B INVOLVED IN: DNA repair%2C 2'-deoxyribonucleotide metabolic process%3B LOCATED IN: cellular_component unknown%3B EXPRESSED IN: 22 plant structures%3B EXPRESS…	GO:0006226,GO:0004170,GO:0006281,GO:0005829,GO:0000287,GO:0046081,GO:0042802
muirii	female-biased	OG0022552
olens	male-biased	OG0000312
olens	male-biased	OG0001989	AT5G60390	ID=AT5G60390;Name=AT5G60390;Note=GTP binding Elongation factor Tu family protein;computational_description=GTP binding Elongation factor Tu family protein%3B FUNCTIONS IN: calmodulin binding%2C translation elongation factor activity%3B INVOLVED IN: translational elongation%3B LOCATED IN: mitochondrion%2C nucleus%2C plasma membrane%2C vacuole%2C cytoplasm%3B EXPRESSED IN: 6 plant structures%3B EXP…	GO:0005737,GO:0005773,GO:0005634,GO:0003924,GO:0005739,GO:0005886,GO:0003746,GO:0006414,GO:0006412,GO:0009506
olens	male-biased	OG0002515	AT4G13710	ID=AT4G13710;Name=AT4G13710;Note=Pectin lyase-like superfamily protein;computational_description=Pectin lyase-like superfamily protein%3B FUNCTIONS IN: lyase activity%2C pectate lyase activity%3B INVOLVED IN: biological_process unknown%3B LOCATED IN: endomembrane system%3B EXPRESSED IN: 20 plant structures%3B EXPRESSED DURING: 6 growth stages%3B CONTAINS InterPro DOMAIN/s: Pectin lyase fold/virul…	GO:0030570,GO:0045490,GO:0005576,GO:0016829,GO:0046872
olens	male-biased	OG0002865
olens	male-biased	OG0003084	AT3G15020	ID=AT3G15020;Name=AT3G15020;Note=Lactate/malate dehydrogenase family protein;symbol=mMDH2;full_name=mitochondrial malate dehydrogenase 2;computational_description=Lactate/malate dehydrogenase family protein%3B FUNCTIONS IN: malate dehydrogenase activity%2C copper ion binding%3B INVOLVED IN: defense response to bacterium%3B LOCATED IN: mitochondrion%2C apoplast%2C membrane%3B EXPRESSED IN: 26 plan…	GO:0005737,GO:0005975,GO:0005829,GO:0005739,GO:0048046,GO:0006099,GO:0030060,GO:0042742,GO:0005759,GO:0005507,GO:0006108,GO:0009507
olens	male-biased	OG0003177	AT4G28940	ID=AT4G28940;Name=AT4G28940;Note=Phosphorylase superfamily protein;computational_description=Phosphorylase superfamily protein%3B FUNCTIONS IN: catalytic activity%3B INVOLVED IN: nucleoside metabolic process%3B LOCATED IN: endomembrane system%3B EXPRESSED IN: hypocotyl%2C root%2C flower%3B EXPRESSED DURING: 4 anthesis%3B CONTAINS InterPro DOMAIN/s: Nucleoside phosphorylase (InterPro:IPR000845)%2C…	GO:0005886
olens	male-biased	OG0004412	AT3G18000	ID=AT3G18000;Name=AT3G18000;Note=S-adenosyl-L-methionine-dependent methyltransferases superfamily protein;curator_summary=Arabidopsis thaliana N-methyltransferase-like protein mRNA. Reduce transmission through pollen.;symbol=XPL1;Alias=NMT1,N-METHYLTRANSFERASE 1,PEAMT;full_name=XIPOTL 1;computational_description=XIPOTL 1 (XPL1)%3B CONTAINS InterPro DOMAIN/s: Methyltransferase type 11 (InterPro:IP…	GO:0005737,GO:0009826,GO:0006656,GO:0032259,GO:0009555,GO:0048528,GO:0009860,GO:0000234,GO:0008168,GO:0042425,GO:0005829,GO:0010183
olens	male-biased	OG0005572	AT5G24090	ID=AT5G24090;Name=AT5G24090;Note=chitinase A;curator_summary=Chitinase A (class III) expressed exclusively under environmental stress conditions.;symbol=CHIA;Alias=ATCHIA,chitinase A;full_name=chitinase A;computational_description=chitinase A (CHIA)%3B FUNCTIONS IN: cation binding%2C hydrolase activity%2C hydrolyzing O-glycosyl compounds%2C catalytic activity%3B INVOLVED IN: response to salt stre…	GO:0005615,GO:0009611,GO:0008422,GO:0000272,GO:0003796,GO:0005576,GO:0009642,GO:0004568,GO:0009409,GO:0009651,GO:0042631,GO:0006032,GO:0002221
olens	male-biased	OG0009596	AT5G13220	ID=AT5G13220;Name=AT5G13220;Note=jasmonate-zim-domain protein 10;curator_summary=Plants overexpressing At5g13220.3%2C but not At5g13220.1 showed enhanced insensitivity to MeJa.;symbol=JAZ10;Alias=JAS1,JASMONATE-ASSOCIATED 1,TIFY9,TIFY DOMAIN PROTEIN 9;full_name=jasmonate-zim-domain protein 10;computational_description=jasmonate-zim-domain protein 10 (JAZ10)%3B FUNCTIONS IN: protein binding%3B INV…	GO:0006952,GO:0009753,GO:0005634,GO:0009611,GO:2000022,GO:0005515,GO:0010112,GO:0031347,GO:0042803
olens	male-biased	OG0011546	AT5G59240	ID=AT5G59240;Name=AT5G59240;Note=Ribosomal protein S8e family protein;computational_description=Ribosomal protein S8e family protein%3B FUNCTIONS IN: structural constituent of ribosome%3B INVOLVED IN: translation%2C ribosome biogenesis%3B LOCATED IN: cytosolic small ribosomal subunit%2C cytosolic ribosome%2C ribosome%2C membrane%3B EXPRESSED IN: 11 plant structures%3B EXPRESSED DURING: 4 anthesis…	GO:0005737,GO:0022626,GO:0022627,GO:0003735,GO:0000462,GO:0006412
olens	male-biased	OG0011978
olens	male-biased	OG0012323	AT2G39700	ID=AT2G39700;Name=AT2G39700;Note=expansin A4;curator_summary=putative expansin. Naming convention from the Expansin Working Group (Kende et al%2C 2004. Plant Mol Bio). Involved in the formation of nematode-induced syncytia in roots of Arabidopsis thaliana.;symbol=EXPA4;Alias=ATEXP4,ATEXPA4,expansin A4,ATHEXP ALPHA 1.6;full_name=expansin A4;computational_description=expansin A4 (EXPA4)%3B CONTAINS…	GO:0009664,GO:0009826,GO:0005829,GO:0016020,GO:0009828,GO:0005576,GO:0006949,GO:0009505,GO:0009506
olens	male-biased	OG0012977	AT5G63180	ID=AT5G63180;Name=AT5G63180;Note=Pectin lyase-like superfamily protein;computational_description=Pectin lyase-like superfamily protein%3B CONTAINS InterPro DOMAIN/s: Pectin lyase fold/virulence factor (InterPro:IPR011050)%2C AmbAllergen (InterPro:IPR018082)%2C Pectate lyase/Amb allergen (InterPro:IPR002022)%2C Pectin lyase fold (InterPro:IPR012334)%2C Parallel beta-helix repeat (InterPro:IPR00662…	GO:0009536,GO:0030570,GO:0016829,GO:0005576,GO:0045490,GO:0046872
olens	male-biased	OG0014756	AT4G14320	ID=AT4G14320;Name=AT4G14320;Note=Zinc-binding ribosomal protein family protein;Alias=API2,APICULATA 2,RPL36aB,RPL36a B;computational_description=Zinc-binding ribosomal protein family protein%3B FUNCTIONS IN: structural constituent of ribosome%3B INVOLVED IN: translation%3B LOCATED IN: ribosome%2C cytosolic large ribosomal subunit%3B EXPRESSED IN: 22 plant structures%3B EXPRESSED DURING: 13 growth…	GO:0005737,GO:0005829,GO:0006412,GO:0022625
olens	male-biased	OG0015946
olens	male-biased	OG0022956	AT3G52590	ID=AT3G52590;Name=AT3G52590;Note=ubiquitin extension protein 1;curator_summary=Ubiquitin extension protein;symbol=UBQ1;Alias=EMB2167,EMBRYO DEFECTIVE 2167,ERD16,EARLY-RESPONSIVE TO DEHYDRATION 16,HAP4,HAPLESS 4;full_name=ubiquitin extension protein 1;computational_description=ubiquitin extension protein 1 (UBQ1)%3B FUNCTIONS IN: structural constituent of ribosome%3B INVOLVED IN: response to water…	GO:0005737,GO:0031625,GO:0005840,GO:0005829,GO:0019941,GO:0005634,GO:0003735,GO:0016567,GO:0009793,GO:0031386,GO:0006412
olens	male-biased	OG0023182	AT5G47690	ID=AT5G47690;Name=AT5G47690;Note=binding protein;Alias=PDS5;computational_description=binding%3B FUNCTIONS IN: binding%3B INVOLVED IN: biological_process unknown%3B LOCATED IN: mitochondrion%2C nucleus%2C chloroplast%3B EXPRESSED IN: cotyledon%2C guard cell%2C cultured cell%3B CONTAINS InterPro DOMAIN/s: Armadillo-type fold (InterPro:IPR016024)%3B BEST Arabidopsis thaliana protein match is: ARM r…	GO:0009536,GO:0009556,GO:0006281,GO:0005634,GO:0005739,GO:0000785,GO:0005515,GO:0007064,GO:0005829
olens	female-biased	OG0000841	AT3G15510	ID=AT3G15510;Name=AT3G15510;Note=NAC domain containing protein 2;curator_summary=Note of caution: not to be confused with another protein (AtNAC6 locus AT5G39610) which on occasion has also been referred to as AtNAC2.;symbol=NAC2;Alias=ANAC056,Arabidopsis NAC domain containing protein 56,ATNAC2,NAC domain containing protein 2,NARS1,NAC-REGULATED SEED MORPHOLOGY 1;full_name=NAC domain containing p…	GO:0044212,GO:0048317,GO:0009753,GO:0003700,GO:0005634,GO:0006355,GO:0080060,GO:0045995
olens	female-biased	OG0001416	AT3G55240	ID=AT3G55240;Name=AT3G55240;Note=Plant protein 1589 of unknown function;curator_summary=Overexpression leads to PEL (Pseudo-Etiolation in Light) phenotype.;computational_description=FUNCTIONS IN: molecular_function unknown%3B INVOLVED IN: developmental process%3B LOCATED IN: endomembrane system%3B CONTAINS InterPro DOMAIN/s: Conserved hypothetical protein CHP01589%2C plant (InterPro:IPR006476)%3B…	GO:0032502,GO:0003674,GO:0009507
olens	female-biased	OG0002925	AT2G46410	ID=AT2G46410;Name=AT2G46410;Note=Homeodomain-like superfamily protein;curator_summary=Nuclear-localized R3-type MYB transcription factor. Positive regulator of hair-cell differentiation. Preferentially transcribed in hairless cells. Moves from atrichoblasts into trichoblast via plasmodesmata in a tissue-specific mode. N-terminus and part of the Myb domain are required for this movement%2C with W7…	GO:0044212,GO:0010063,GO:0010376,GO:0009751,GO:0009753,GO:0043565,GO:0003700,GO:0005634,GO:0030154,GO:0009913,GO:0005515
olens	female-biased	OG0004111	AT5G12180	ID=AT5G12180;Name=AT5G12180;Note=calcium-dependent protein kinase 17;curator_summary=member of Calcium Dependent Protein Kinase;symbol=CPK17;full_name=calcium-dependent protein kinase 17;computational_description=calcium-dependent protein kinase 17 (CPK17)%3B FUNCTIONS IN: in 6 functions%3B INVOLVED IN: regulation of pollen tube growth%2C protein amino acid phosphorylation%2C N-terminal protein m…	GO:0005737,GO:0018105,GO:0080092,GO:0005634,GO:0004683,GO:0009931,GO:0004674,GO:0005509,GO:0005886,GO:0035556,GO:0046777,GO:0005524,GO:0005516
olens	female-biased	OG0004193	AT3G02310	ID=AT3G02310;Name=AT3G02310;Note=K-box region and MADS-box transcription factor family protein;curator_summary=MADS-box protein%2C binds K domain of AG in vivo;symbol=SEP2;Alias=AGL4,AGAMOUS-like 4;full_name=SEPALLATA 2;computational_description=SEPALLATA 2 (SEP2)%3B FUNCTIONS IN: protein binding%2C DNA binding%2C sequence-specific DNA binding transcription factor activity%3B INVOLVED IN: flower …	GO:0044212,GO:0043565,GO:0003700,GO:0005634,GO:0030154,GO:0007275,GO:0000976,GO:0000977,GO:0005515,GO:0048481,GO:0045944,GO:0046983,GO:0009908,GO:0008134,GO:0000981
olens	female-biased	OG0004820	AT1G71692	ID=AT1G71692;Name=AT1G71692;Note=AGAMOUS-like 12;curator_summary=Encodes a member of the MADS box family of transcription factors. Involved in root cell differentiation and flowering time. Loss of function mutations have abnormal cellular differentiation in the roots and are late flowering. AGL12 along with AGL14%2C and AGL17 is preferentially expressed in root tissues and represent the only char…	GO:0044212,GO:0043565,GO:0003700,GO:0040008,GO:0008134,GO:0048364,GO:0045944,GO:0000977,GO:0005515,GO:0010228,GO:0000976,GO:0046983,GO:0005634,GO:0009908,GO:0007275,GO:0000981
olens	female-biased	OG0005138	AT3G21420	ID=AT3G21420;Name=AT3G21420;Note=2-oxoglutarate (2OG) and Fe(II)-dependent oxygenase superfamily protein;symbol=LBO1;full_name=LATERAL BRANCHING OXIDOREDUCTASE 1;computational_description=2-oxoglutarate (2OG) and Fe(II)-dependent oxygenase superfamily protein%3B FUNCTIONS IN: oxidoreductase activity%3B INVOLVED IN: metabolic process%3B LOCATED IN: cellular_component unknown%3B EXPRESSED IN: 16 pl…	GO:1901601,GO:0005737,GO:0046872,GO:0055114,GO:0051213
olens	female-biased	OG0006669	AT5G01750	ID=AT5G01750;Name=AT5G01750;Note=LURP-one-like protein (DUF567);computational_description=Protein of unknown function (DUF567)%3B FUNCTIONS IN: molecular_function unknown%3B INVOLVED IN: biological_process unknown%3B LOCATED IN: chloroplast%3B EXPRESSED IN: 23 plant structures%3B EXPRESSED DURING: 13 growth stages%3B CONTAINS InterPro DOMAIN/s: Protein of unknown function DUF567 (InterPro:IPR0076…	GO:0005737,GO:0005829,GO:0003674,GO:0005886
olens	female-biased	OG0006845	AT1G01900	ID=AT1G01900;Name=AT1G01900;Note=subtilase family protein;curator_summary=Encodes AtSBT1.1%2C a subtilisin-like serine protease. Cleaves the phytosulfokine AtPSK4%2C a growth promoting peptide.;symbol=SBTI1.1;computational_description=SBTI1.1%3B FUNCTIONS IN: serine-type endopeptidase activity%3B INVOLVED IN: proteolysis%2C negative regulation of catalytic activity%3B LOCATED IN: extracellular ma…	GO:0004252,GO:0005618,GO:0031012,GO:0048046,GO:0005576,GO:0006508
olens	female-biased	OG0011194	AT5G22280	ID=AT5G22280;Name=AT5G22280;Note=peptidyl-prolyl cis-trans isomerase G;computational_description=unknown protein%3B FUNCTIONS IN: molecular_function unknown%3B INVOLVED IN: biological_process unknown%3B LOCATED IN: endomembrane system%3B EXPRESSED IN: 22 plant structures%3B EXPRESSED DURING: 13 growth stages%3B BEST Arabidopsis thaliana protein match is: unknown protein (TAIR:AT3G44280.1)%3B Has …	GO:0005634,GO:0008150,GO:0016853,GO:0005739
olens	female-biased	OG0015412	AT1G62290	ID=AT1G62290;Name=AT1G62290;Note=Saposin-like aspartyl protease family protein;computational_description=Saposin-like aspartyl protease family protein%3B FUNCTIONS IN: aspartic-type endopeptidase activity%3B INVOLVED IN: proteolysis%2C lipid metabolic process%3B LOCATED IN: vacuole%3B EXPRESSED IN: 10 plant structures%3B EXPRESSED DURING: LP.06 six leaves visible%2C LP.04 four leaves visible%2C s…	GO:0006629,GO:0099503,GO:0005773,GO:0005634,GO:0005576,GO:0004190,GO:0030163,GO:0006508
olens	female-biased	OG0022854	AT5G45120	ID=AT5G45120;Name=AT5G45120;Note=Eukaryotic aspartyl protease family protein;computational_description=Eukaryotic aspartyl protease family protein%3B FUNCTIONS IN: aspartic-type endopeptidase activity%3B INVOLVED IN: proteolysis%3B CONTAINS InterPro DOMAIN/s: Peptidase aspartic (InterPro:IPR021109)%2C Peptidase aspartic%2C catalytic (InterPro:IPR009007)%2C Peptidase A1 (InterPro:IPR001461)%2C Pep…	GO:0006508,GO:0005576,GO:0004190,GO:0030163,GO:0003677
platyspermum	male-biased	OG0000480	AT3G50410	ID=AT3G50410;Name=AT3G50410;Note=OBF binding protein 1;curator_summary=Arabidopsis Dof protein containing a single 51-amino acid zinc finger DNA-binding domain%2C which may play an important roles in plant growth and development.;symbol=OBP1;full_name=OBF binding protein 1;computational_description=OBF binding protein 1 (OBP1)%3B CONTAINS InterPro DOMAIN/s: Zinc finger%2C Dof-type (InterPro:IPR00…	GO:0042545,GO:0044212,GO:0009751,GO:0045787,GO:0003700,GO:0005634,GO:0009733,GO:0045893,GO:0005515,GO:0003677,GO:0008270
platyspermum	male-biased	OG0000569	AT1G62660	ID=AT1G62660;Name=AT1G62660;Note=Glycosyl hydrolases family 32 protein;computational_description=Glycosyl hydrolases family 32 protein%3B FUNCTIONS IN: hydrolase activity%2C hydrolyzing O-glycosyl compounds%3B INVOLVED IN: sucrose catabolic process%2C using beta-fructofuranosidase%2C carbohydrate metabolic process%3B LOCATED IN: vacuole%3B EXPRESSED IN: 23 plant structures%3B EXPRESSED DURING: 12…	GO:0071370,GO:0016020,GO:0000325,GO:0009617,GO:0009737,GO:0005773,GO:0016021,GO:0009738,GO:0005985,GO:0005775,GO:0009414,GO:0004575,GO:0009651,GO:0005634
platyspermum	male-biased	OG0006786	AT2G40090	ID=AT2G40090;Name=AT2G40090;Note=ABC2 homolog 9;curator_summary=member of ATH subfamily;symbol=ATH9;Alias=ATATH9,ABC2 homolog 9;full_name=ABC2 homolog 9;computational_description=ABC2 homolog 9 (ATH9)%3B CONTAINS InterPro DOMAIN/s: ABC-1 (InterPro:IPR004147)%2C Protein kinase-like domain (InterPro:IPR011009)%3B BEST Arabidopsis thaliana protein match is: Protein kinase superfamily protein (TAIR:A…	GO:0005215,GO:0005576
platyspermum	male-biased	OG0009712	AT5G05690	ID=AT5G05690;Name=AT5G05690;Note=Cytochrome P450 superfamily protein;curator_summary=Encodes a member of the CP90A family%2C a cytochrome P450 monooxygenase which converts 6-deoxocathasterone to 6-deoxoteasterone in the late C6 oxidation pathway and cathasterone to teasterone in the early C6 oxidation pathway of brassinolide biosynthesis. Expressed in cotyledons and leaves. Mutants display de-eti…	GO:0009826,GO:0004497,GO:0016125,GO:0016021,GO:0020037,GO:0010584,GO:0016132,GO:0009911,GO:0016705,GO:0005739,GO:0010268,GO:0048657,GO:0005506,GO:0010224,GO:0007275,GO:0055114,GO:0016491
platyspermum	male-biased	OG0010534	AT2G36190	ID=AT2G36190;Name=AT2G36190;Note=cell wall invertase 4;curator_summary=cwINV4 appears to function as a cell wall-localized invertase (that can catalyze the hydrolysis of sucrose into fructose and glucose) based on the phenotype of cwinv4 mutants. cwINV4 transcripts are expressed at high levels in lateral and median nectaries and this enzyme plays an important role in nectar production.;symbol=cwI…	GO:0005618,GO:0005982,GO:0005987,GO:0048046,GO:0004575,GO:0071836
platyspermum	male-biased	OG0010638
platyspermum	male-biased	OG0012434	AT2G30520	ID=AT2G30520;Name=AT2G30520;Note=Phototropic-responsive NPH3 family protein;curator_summary=light inducible root phototropism 2 encoding a signal transducer of the phototropic response in Arabidopsis;symbol=RPT2;full_name=ROOT PHOTOTROPISM 2;computational_description=ROOT PHOTOTROPISM 2 (RPT2)%3B FUNCTIONS IN: signal transducer activity%3B INVOLVED IN: phototropism%3B LOCATED IN: nucleus%3B EXPRE…	GO:0005737,GO:0009638,GO:0005634,GO:0005777,GO:0016567,GO:0007165
platyspermum	male-biased	OG0012696	AT1G62660	ID=AT1G62660;Name=AT1G62660;Note=Glycosyl hydrolases family 32 protein;computational_description=Glycosyl hydrolases family 32 protein%3B FUNCTIONS IN: hydrolase activity%2C hydrolyzing O-glycosyl compounds%3B INVOLVED IN: sucrose catabolic process%2C using beta-fructofuranosidase%2C carbohydrate metabolic process%3B LOCATED IN: vacuole%3B EXPRESSED IN: 23 plant structures%3B EXPRESSED DURING: 12…	GO:0071370,GO:0016020,GO:0000325,GO:0009617,GO:0009737,GO:0005773,GO:0016021,GO:0009738,GO:0005985,GO:0005775,GO:0009414,GO:0004575,GO:0009651,GO:0005634
platyspermum	male-biased	OG0014744	AT5G42650	ID=AT5G42650;Name=AT5G42650;Note=allene oxide synthase;curator_summary=Encodes a member of the cytochrome p450 CYP74 gene family that functions as an allene oxide synthase. This enzyme catalyzes dehydration of the hydroperoxide to an unstable allene oxide in the JA biosynthetic pathway. It shows a dual catalytic activity%2C the major one being a 13-AOS but also expressing a 9-AOS activity.;symbol…	GO:0004497,GO:0009695,GO:0016491,GO:0009535,GO:0009941,GO:0009536,GO:0009753,GO:0016705,GO:0009611,GO:0005739,GO:0047987,GO:0005506,GO:0019373,GO:0009579,GO:0016125,GO:0020037,GO:0009534,GO:0010287,GO:0050832,GO:0055114,GO:0009507,GO:0006952,GO:0031408,GO:0019825,GO:0009978,GO:0009620,GO:0016836,GO:0031407
platyspermum	male-biased	OG0023905	AT4G33010	ID=AT4G33010;Name=AT4G33010;Note=glycine decarboxylase P-protein 1;symbol=GLDP1;Alias=AtGLDP1,glycine decarboxylase P-protein 1;full_name=glycine decarboxylase P-protein 1;computational_description=glycine decarboxylase P-protein 1 (GLDP1)%3B FUNCTIONS IN: glycine dehydrogenase (decarboxylating) activity%2C protein binding%3B INVOLVED IN: glycine catabolic process%2C response to cadmium ion%2C gl…	GO:0009941,GO:0005960,GO:0004375,GO:0009534,GO:0009570,GO:0005829,GO:0006546,GO:0005739,GO:0048046,GO:0030170,GO:0005515,GO:0005886,GO:0046686,GO:0016594,GO:0019464,GO:0055114,GO:0009507
platyspermum	male-biased	OG0024097	AT3G08670	ID=AT3G08670;Name=AT3G08670;Note=serine/arginine repetitive matrix-like protein;computational_description=unknown protein%3B BEST Arabidopsis thaliana protein match is: unknown protein (TAIR:AT3G51540.1)%3B Has 48380 Blast hits to 29827 proteins in 1356 species: Archae - 46%3B Bacteria - 5589%3B Metazoa - 17361%3B Fungi - 13192%3B Plants - 2237%3B Viruses - 905%3B Other Eukaryotes - 9050 (source:…	GO:0005634,GO:0006979,GO:0055028
platyspermum	female-biased	OG0000002	AT3G15353	ID=AT3G15353;Name=AT3G15353;Note=metallothionein 3;curator_summary=metallothionein%2C binds to and detoxifies excess copper and other metals%2C limiting oxidative damage;symbol=MT3;Alias=ATMT3;full_name=metallothionein 3;computational_description=metallothionein 3 (MT3)%3B Has 268 Blast hits to 268 proteins in 64 species: Archae - 0%3B Bacteria - 0%3B Metazoa - 0%3B Fungi - 0%3B Plants - 268%3B V…	GO:0005623,GO:0005507,GO:0008270,GO:0006878,GO:0005576
platyspermum	female-biased	OG0000015	AT3G15353	ID=AT3G15353;Name=AT3G15353;Note=metallothionein 3;curator_summary=metallothionein%2C binds to and detoxifies excess copper and other metals%2C limiting oxidative damage;symbol=MT3;Alias=ATMT3;full_name=metallothionein 3;computational_description=metallothionein 3 (MT3)%3B Has 268 Blast hits to 268 proteins in 64 species: Archae - 0%3B Bacteria - 0%3B Metazoa - 0%3B Fungi - 0%3B Plants - 268%3B V…	GO:0005623,GO:0005507,GO:0008270,GO:0006878,GO:0005576
platyspermum	female-biased	OG0000034	AT1G22380	ID=AT1G22380;Name=AT1G22380;Note=UDP-glucosyl transferase 85A3;curator_summary=Encodes a putative UDP-glucosyl transferase. At1g22380 was initially identified as encoding the protein AAF87154%2C which has been classified as a bHLH protein (AtbHLH152). Subsequently it has been found that the AAF87154 protein appears to be encoded by the AT1G23970 genomic locus.;symbol=UGT85A3;Alias=AtUGT85A3,UDP-g…	GO:0080044,GO:0043231,GO:0080043,GO:0016757,GO:0015020,GO:0008194
platyspermum	female-biased	OG0000197	AT1G14700	ID=AT1G14700;Name=AT1G14700;Note=purple acid phosphatase 3;symbol=PAP3;Alias=ATPAP3;full_name=purple acid phosphatase 3;computational_description=purple acid phosphatase 3 (PAP3)%3B FUNCTIONS IN: protein serine/threonine phosphatase activity%2C acid phosphatase activity%3B LOCATED IN: vacuole%3B EXPRESSED IN: 22 plant structures%3B EXPRESSED DURING: 12 growth stages%3B CONTAINS InterPro DOMAIN/s:…	GO:0008199,GO:0016311,GO:0005634,GO:0008198,GO:0005773,GO:0005576,GO:0003993
platyspermum	female-biased	OG0000283	AT1G77120	ID=AT1G77120;Name=AT1G77120;Note=alcohol dehydrogenase 1;curator_summary=Catalyzes the reduction of acetaldehyde using NADH as reductant. Requires zinc for activity. Dimer. Anaerobic response polypeptide (ANP). Fermentation. The protein undergoes thiolation following treatment with the oxidant tert-butylhydroperoxide.;symbol=ADH1;Alias=ADH,ALCOHOL DEHYDROGENASE,ATADH1,ATADH,ARABIDOPSIS THALIANA A…	GO:0009413,GO:0008270,GO:0009414,GO:0009651,GO:0001666,GO:0005737,GO:0032355,GO:0009737,GO:0000166,GO:0071456,GO:0046686,GO:0042803,GO:0004024,GO:0004022,GO:0045333,GO:0031000,GO:0005886,GO:0009409,GO:0055114,GO:0009744,GO:1900039,GO:0042542,GO:0005829,GO:0046294,GO:0051903,GO:0006970
platyspermum	female-biased	OG0000708	AT1G64950	ID=AT1G64950;Name=AT1G64950;Note=cytochrome P450%2C family 89%2C subfamily A%2C polypeptide 5;curator_summary=member of CYP89A;symbol=CYP89A5;full_name=cytochrome P450%2C family 89%2C subfamily A%2C polypeptide 5;computational_description=cytochrome P450%2C family 89%2C subfamily A%2C polypeptide 5 (CYP89A5)%3B FUNCTIONS IN: electron carrier activity%2C monooxygenase activity%2C iron ion binding%…	GO:0005783,GO:0020037,GO:0016709,GO:0016020,GO:0005506,GO:0055114
platyspermum	female-biased	OG0000761	AT2G45130	ID=AT2G45130;Name=AT2G45130;Note=SPX domain protein 3;curator_summary=Expression is upregulated in the shoot of cax1/cax3 mutant.;symbol=SPX3;Alias=ATSPX3,ARABIDOPSIS THALIANA SPX DOMAIN GENE 3;full_name=SPX domain gene 3;computational_description=SPX domain gene 3 (SPX3)%3B CONTAINS InterPro DOMAIN/s: SPX%2C N-terminal (InterPro:IPR004331)%3B BEST Arabidopsis thaliana protein match is: SPX domai…	GO:0005737,GO:0080040,GO:0016036
platyspermum	female-biased	OG0000865	AT3G15353	ID=AT3G15353;Name=AT3G15353;Note=metallothionein 3;curator_summary=metallothionein%2C binds to and detoxifies excess copper and other metals%2C limiting oxidative damage;symbol=MT3;Alias=ATMT3;full_name=metallothionein 3;computational_description=metallothionein 3 (MT3)%3B Has 268 Blast hits to 268 proteins in 64 species: Archae - 0%3B Bacteria - 0%3B Metazoa - 0%3B Fungi - 0%3B Plants - 268%3B V…	GO:0005623,GO:0005507,GO:0008270,GO:0006878,GO:0005576
platyspermum	female-biased	OG0001003	AT3G07820	ID=AT3G07820;Name=AT3G07820;Note=Pectin lyase-like superfamily protein;computational_description=Pectin lyase-like superfamily protein%3B FUNCTIONS IN: polygalacturonase activity%3B INVOLVED IN: carbohydrate metabolic process%3B LOCATED IN: endomembrane system%3B EXPRESSED IN: 11 plant structures%3B EXPRESSED DURING: L mature pollen stage%2C M germinated pollen stage%2C 4 anthesis%2C C globular s…	GO:0071555,GO:0016829,GO:0005576,GO:0005975,GO:0004650
platyspermum	female-biased	OG0001051	AT1G17710	ID=AT1G17710;Name=AT1G17710;Note=Pyridoxal phosphate phosphatase-related protein;curator_summary=Encodes a phosphoethanolamine/phosphocholine phosphatase. It is likely to be involved in the liberation of inorganic phosphate from intracellular sources. Expression is upregulated in the shoot of cax1/cax3 mutant.;symbol=PEPC1;Alias=AtPEPC1,Arabidopsis thaliana phosphoethanolamine/phosphocholine phos…	GO:0016791,GO:0016311,GO:0005634,GO:0046872,GO:0052732,GO:0052731
platyspermum	female-biased	OG0001148	AT5G52640	ID=AT5G52640;Name=AT5G52640;Note=heat shock-like protein;curator_summary=Encodes a cytosolic heat shock protein AtHSP90.1. AtHSP90.1 interacts with disease resistance signaling components SGT1b and RAR1 and is required for RPS2-mediated resistance.;symbol=HSP90.1;Alias=ATHS83,ATHSP90.1,heat shock protein 90.1,AtHsp90-1,HEAT SHOCK PROTEIN 90-1,HSP81-1,HEAT SHOCK PROTEIN 81-1,HSP81.1,HSP83,HEAT SHO…	GO:0005737,GO:0006457,GO:0032991,GO:0009816,GO:0009986,GO:0051082,GO:0061077,GO:0050821,GO:0005618,GO:0034605,GO:0042742,GO:0005515,GO:0005886,GO:0009408,GO:0048471,GO:0046685,GO:0005829,GO:0005524
platyspermum	female-biased	OG0001251
platyspermum	female-biased	OG0001259	AT1G08650	ID=AT1G08650;Name=AT1G08650;Note=phosphoenolpyruvate carboxylase kinase 1;curator_summary=Encodes a phosphoenolpyruvate carboxylase kinase that is expressed at highest levels in leaves. Expression is induced by light.;symbol=PPCK1;Alias=ATPPCK1,PHOSPHOENOLPYRUVATE CARBOXYLASE KINASE 1;full_name=phosphoenolpyruvate carboxylase kinase 1;computational_description=phosphoenolpyruvate carboxylase kina…	GO:0005737,GO:0006468,GO:0018105,GO:0004683,GO:0005634,GO:0009931,GO:0004674,GO:0005516,GO:0005886,GO:0035556,GO:0046777,GO:0005524
platyspermum	female-biased	OG0001416	AT3G55240	ID=AT3G55240;Name=AT3G55240;Note=Plant protein 1589 of unknown function;curator_summary=Overexpression leads to PEL (Pseudo-Etiolation in Light) phenotype.;computational_description=FUNCTIONS IN: molecular_function unknown%3B INVOLVED IN: developmental process%3B LOCATED IN: endomembrane system%3B CONTAINS InterPro DOMAIN/s: Conserved hypothetical protein CHP01589%2C plant (InterPro:IPR006476)%3B…	GO:0032502,GO:0003674,GO:0009507
platyspermum	female-biased	OG0002158
platyspermum	female-biased	OG0002183	AT2G46660	ID=AT2G46660;Name=AT2G46660;Note=cytochrome P450%2C family 78%2C subfamily A%2C polypeptide 6;curator_summary=Encodes a member of CYP78A cytochrome P450 monooxygenase protein family that is required in the sporophytic tissue of the mother plant to promote seed growth.;symbol=CYP78A6;Alias=EOD3,enhancer of da1-1;full_name=cytochrome P450%2C family 78%2C subfamily A%2C polypeptide 6;computational_d…	GO:0048316,GO:0020037,GO:0016709,GO:0016021,GO:0016020,GO:0005506,GO:0040008,GO:0055114,GO:0009507
platyspermum	female-biased	OG0002228	AT5G20150	ID=AT5G20150;Name=AT5G20150;Note=SPX domain-containing protein 1;curator_summary=Expression is upregulated in the shoot of cax1/cax3 mutant. Additionally%2C its expression is responsive to both phosphate (Pi) and phosphite (Phi) in both roots and shoots.;symbol=SPX1;Alias=ATSPX1,ARABIDOPSIS THALIANA SPX DOMAIN GENE 1;full_name=SPX domain gene 1;computational_description=SPX domain gene 1 (SPX1)%3…	GO:0016036,GO:0005634,GO:0080040,GO:0005886,GO:0071456
platyspermum	female-biased	OG0002770	AT3G07565	ID=AT3G07565;Name=AT3G07565;Note=histone H2A deubiquitinase (DUF3755);computational_description=FUNCTIONS IN: DNA binding%3B INVOLVED IN: biological_process unknown%3B LOCATED IN: chloroplast%3B EXPRESSED IN: 23 plant structures%3B EXPRESSED DURING: 15 growth stages%3B CONTAINS InterPro DOMAIN/s: SANT%2C DNA-binding (InterPro:IPR001005)%2C Protein of unknown function DUF3755 (InterPro:IPR022228)%…	GO:0005634,GO:0009507,GO:0008150,GO:0003677
platyspermum	female-biased	OG0003560	AT5G04990	ID=AT5G04990;Name=AT5G04990;Note=SAD1/UNC-84 domain protein 1;curator_summary=Encodes a member of the Sad1/UNC-84 (SUN)-domain proteins: AtSUN1(At5g04990)%2C AtSUN2(AT3G10730). SUN domain proteins are part of the cytoskeletal-nucleoskeletal bridging complexes. AtSUN1 and AtSUN2 are localized to the nuclear envelope and are present as homomers and heteromers in vivo.Encodes an outer nuclear membra…	GO:0070197,GO:0006997,GO:0009524,GO:0005783,GO:0090435,GO:0005637,GO:0005634,GO:0005635,GO:0051260,GO:0043495,GO:0006998,GO:0005789,GO:0051291,GO:0005856,GO:2000769,GO:0005515,GO:0016021,GO:0043621
platyspermum	female-biased	OG0003758	AT1G32450	ID=AT1G32450;Name=AT1G32450;Note=nitrate transporter 1.5;curator_summary=Transmembrane nitrate transporter. Involved in xylem transport of nitrate from root to shoot. Induced in response to nitrate. Not involved in nitrate uptake. expressed in root pericycle cells.;symbol=NRT1.5;Alias=AtNPF7.3,NPF7.3,NRT1/ PTR family 7.3;full_name=nitrate transporter 1.5;computational_description=nitrate transpor…	GO:0010150,GO:0010167,GO:0015706,GO:0015293,GO:1902600,GO:0015112,GO:0005634,GO:0055075,GO:0005886,GO:0015386,GO:0016021
platyspermum	female-biased	OG0003953	AT2G29420	ID=AT2G29420;Name=AT2G29420;Note=glutathione S-transferase tau 7;curator_summary=Encodes glutathione transferase belonging to the tau class of GSTs. Naming convention according to Wagner et al. (2002). Induced by Salicylic acid. Independent of NPR1 for their induction by salicylic acid.;symbol=GSTU7;Alias=ATGSTU7,glutathione S-transferase tau 7,GST25,GLUTATHIONE S-TRANSFERASE 25;full_name=glutath…	GO:0005737,GO:0004364,GO:0009751,GO:0009407,GO:0005829,GO:0006749
platyspermum	female-biased	OG0004152	AT5G50700	ID=AT5G50700;Name=AT5G50700;Note=hydroxysteroid dehydrogenase 1;curator_summary=Encodes a hydroxysteroid dehydrogenase HSD1. Two copies of HSD1 (At5g50600 and At5g50700) exist in the Arabidopsis genome as a result of an exact 33-kb duplication on chromosome 5 encompassing seven genes. There are five homologs of HSD1 in Arabidopsis (HSD2-At3g47350%2C HSD3-At3g47360%2C HSD4-At5g50590%2C HSD4-At5g50…	GO:0055114,GO:0009507
platyspermum	female-biased	OG0004218	AT3G11210	ID=AT3G11210;Name=AT3G11210;Note=SGNH hydrolase-type esterase superfamily protein;computational_description=SGNH hydrolase-type esterase superfamily protein%3B FUNCTIONS IN: hydrolase activity%2C hydrolase activity%2C acting on ester bonds%2C carboxylesterase activity%3B INVOLVED IN: lipid metabolic process%3B LOCATED IN: cellular_component unknown%3B EXPRESSED IN: 20 plant structures%3B EXPRESSE…	GO:0005737,GO:0016787,GO:0005576,GO:0016042
platyspermum	female-biased	OG0004487	AT5G20700	ID=AT5G20700;Name=AT5G20700;Note=senescence-associated family protein%2C putative (DUF581);computational_description=Protein of unknown function (DUF581)%3B CONTAINS InterPro DOMAIN/s: Protein of unknown function DUF581 (InterPro:IPR007650)%3B BEST Arabidopsis thaliana protein match is: Protein of unknown function (DUF581) (TAIR:AT1G74940.1)%3B Has 476 Blast hits to 476 proteins in 20 species: Ar…	GO:0005737,GO:0009744,GO:0005634,GO:0009749,GO:1905582,GO:0042594,GO:0046872
platyspermum	female-biased	OG0004809	AT1G12100	ID=AT1G12100;Name=AT1G12100;Note=Bifunctional inhibitor/lipid-transfer protein/seed storage 2S albumin superfamily protein;computational_description=Bifunctional inhibitor/lipid-transfer protein/seed storage 2S albumin superfamily protein%3B FUNCTIONS IN: lipid binding%3B INVOLVED IN: lipid transport%3B LOCATED IN: endomembrane system%3B EXPRESSED IN: shoot apex%2C embryo%2C flower%2C leaf%2C see…	GO:0005576
platyspermum	female-biased	OG0006561	AT5G16060	ID=AT5G16060;Name=AT5G16060;Note=Cytochrome c oxidase biogenesis protein Cmc1-like protein;computational_description=Cytochrome c oxidase biogenesis protein Cmc1-like%3B CONTAINS InterPro DOMAIN/s: Cytochrome c oxidase biogenesis protein Cmc1-like (InterPro:IPR013892)%3B Has 1807 Blast hits to 1807 proteins in 277 species: Archae - 0%3B Bacteria - 0%3B Metazoa - 736%3B Fungi - 347%3B Plants - 385…	GO:0003674,GO:0009536,GO:0008150,GO:0005739
platyspermum	female-biased	OG0006737	AT1G67785	ID=AT1G67785;Name=AT1G67785;Note=hypothetical protein;computational_description=unknown protein%3B Has 30 Blast hits to 30 proteins in 12 species: Archae - 0%3B Bacteria - 0%3B Metazoa - 0%3B Fungi - 0%3B Plants - 30%3B Viruses - 0%3B Other Eukaryotes - 0 (source: NCBI BLink).;Dbxref=PMID:12837548,PMID:18189341,PMID:21167537,locus:504956324;locus_type=protein_coding	GO:0008150,GO:0003674,GO:0005747,GO:0005739
platyspermum	female-biased	OG0007720	AT5G19430	ID=AT5G19430;Name=AT5G19430;Note=RING/U-box superfamily protein;curator_summary=Encodes a C3HC4-type RING finger E3 ubiquitin ligase of the RING/U-box superfamily whose expression is responsive to both phosphate (Pi) and phosphite (Phi) in both roots and shoots.;Alias=C3HC4;computational_description=RING/U-box superfamily protein%3B FUNCTIONS IN: zinc ion binding%3B EXPRESSED IN: 22 plant structu…	GO:0005634
platyspermum	female-biased	OG0009162	AT4G35750	ID=AT4G35750;Name=AT4G35750;Note=SEC14 cytosolic factor family protein / phosphoglyceride transfer family protein;computational_description=SEC14 cytosolic factor family protein / phosphoglyceride transfer family protein%3B CONTAINS InterPro DOMAIN/s: Cellular retinaldehyde-binding/triple function%2C C-terminal (InterPro:IPR001251)%3B BEST Arabidopsis thaliana protein match is: SEC14 cytosolic fa…	GO:0005737,GO:0008150,GO:0003674
platyspermum	female-biased	OG0009538	AT5G57685	ID=AT5G57685;Name=AT5G57685;Note=glutamine dumper 3;curator_summary=Encodes a member of the GDU (glutamine dumper) family proteins involved in amino acid export: At4g31730 (GDU1)%2C At4g25760 (GDU2)%2C At5g57685 (GDU3)%2C At2g24762 (GDU4)%2C At5g24920 (GDU5)%2C At3g30725 (GDU6) and At5g38770 (GDU7).;symbol=GDU3;Alias=ATGDU3,ARABIDOPSIS THALIANA GLUTAMINE DUMPER 3,LSB1,LESS SUSCEPTIBLE TO BSCTV 1;…	GO:0080143,GO:0009615,GO:0016021,GO:0006865,GO:0019048,GO:0032940,GO:0003674,GO:0005634
platyspermum	female-biased	OG0009759	AT4G36850	ID=AT4G36850;Name=AT4G36850;Note=PQ-loop repeat family protein / transmembrane family protein;computational_description=PQ-loop repeat family protein / transmembrane family protein%3B CONTAINS InterPro DOMAIN/s: Cystinosin/ERS1p repeat (InterPro:IPR006603)%3B BEST Arabidopsis thaliana protein match is: PQ-loop repeat family protein / transmembrane family protein (TAIR:AT2G41050.1)%3B Has 883 Blas…	GO:0016021,GO:0008150
platyspermum	female-biased	OG0009885	AT3G57450	ID=AT3G57450;Name=AT3G57450;Note=hypothetical protein;computational_description=unknown protein%3B Has 65 Blast hits to 65 proteins in 11 species: Archae - 0%3B Bacteria - 0%3B Metazoa - 0%3B Fungi - 0%3B Plants - 65%3B Viruses - 0%3B Other Eukaryotes - 0 (source: NCBI BLink).;Dbxref=PMID:15720654,PMID:18805951,PMID:18775970,locus:2103503;locus_type=protein_coding	GO:0003674,GO:0008150
platyspermum	female-biased	OG0009921	AT5G66530	ID=AT5G66530;Name=AT5G66530;Note=Galactose mutarotase-like superfamily protein;computational_description=Galactose mutarotase-like superfamily protein%3B FUNCTIONS IN: carbohydrate binding%2C isomerase activity%2C aldose 1-epimerase activity%2C catalytic activity%3B INVOLVED IN: galactose metabolic process%2C carbohydrate metabolic process%3B LOCATED IN: apoplast%2C chloroplast%2C chloroplast str…	GO:0009536,GO:0005975,GO:0009570,GO:0048046,GO:0009507,GO:0047938
platyspermum	female-biased	OG0010105	AT1G15380	ID=AT1G15380;Name=AT1G15380;Note=Lactoylglutathione lyase / glyoxalase I family protein;symbol=GLYI4;full_name=glyoxylase I 4;computational_description=Lactoylglutathione lyase / glyoxalase I family protein%3B CONTAINS InterPro DOMAIN/s: Glyoxalase/bleomycin resistance protein/dioxygenase (InterPro:IPR004360)%3B BEST Arabidopsis thaliana protein match is: Lactoylglutathione lyase / glyoxalase I f…	GO:0005737,GO:2000031,GO:0016829,GO:0009787,GO:2000022
platyspermum	female-biased	OG0010229
platyspermum	female-biased	OG0010386	AT1G12820	ID=AT1G12820;Name=AT1G12820;Note=auxin signaling F-box 3;curator_summary=Auxin receptor involved in primary and lateral root growth inhibition in response to nitrate. Target of miR393. Induced by nitrate in primary roots.;symbol=AFB3;full_name=auxin signaling F-box 3;computational_description=auxin signaling F-box 3 (AFB3)%3B CONTAINS InterPro DOMAIN/s: F-box domain%2C cyclin-like (InterPro:IPR00…	GO:0048443,GO:0080022,GO:0010152,GO:0071249,GO:0010011,GO:0005634,GO:0006952,GO:0016567,GO:0048527
platyspermum	female-biased	OG0010406	ATMG00513	ID=ATMG00513;Note=NADH dehydrogenase 5A;Name=ATMG00513;curator_summary=Mitochondrial NADH dehydrogenase subunit 5. The gene is trans-spliced from three different pre-cursors%2C NAD5a%2C NAD5b and NAD5c.;symbol=NAD5A;Alias=NAD5.1,NADH DEHYDROGENASE 5.1,NAD5,NADH DEHYDROGENASE SUBUNIT 5;full_name=NADH dehydrogenase 5A;computational_description=NADH dehydrogenase 5A (NAD5A)%3B CONTAINS InterPro DOMA…	GO:0008137,GO:0016021,GO:0005739,GO:0042773,GO:0005743,GO:0045333,GO:0005747,GO:0070469,GO:0003954,GO:0055114
platyspermum	female-biased	OG0010643	AT1G09645	ID=AT1G09645;Name=AT1G09645;Note=transmembrane protein;computational_description=unknown protein%3B BEST Arabidopsis thaliana protein match is: unknown protein (TAIR:AT1G57765.1)%3B Has 35333 Blast hits to 34131 proteins in 2444 species: Archae - 798%3B Bacteria - 22429%3B Metazoa - 974%3B Fungi - 991%3B Plants - 531%3B Viruses - 0%3B Other Eukaryotes - 9610 (source: NCBI BLink).;Dbxref=locus:504…	GO:0008150,GO:0016021,GO:0003674,GO:0009507
platyspermum	female-biased	OG0010711
platyspermum	female-biased	OG0011137	ATMG00660	ID=ATMG00660;Note=hypothetical protein;Name=ATMG00660;symbol=ORF149;computational_description=unknown protein.;Dbxref=locus:504954549;locus_type=protein_coding	GO:0008150,GO:0003674,GO:0005739
platyspermum	female-biased	OG0011421
platyspermum	female-biased	OG0011523	AT1G59960	ID=AT1G59960;Name=AT1G59960;Note=NAD(P)-linked oxidoreductase superfamily protein;computational_description=NAD(P)-linked oxidoreductase superfamily protein%3B FUNCTIONS IN: oxidoreductase activity%3B INVOLVED IN: response to salt stress%3B EXPRESSED IN: 21 plant structures%3B EXPRESSED DURING: 13 growth stages%3B CONTAINS InterPro DOMAIN/s: Aldo/keto reductase (InterPro:IPR001395)%2C Aldo/keto r…	GO:0004032,GO:0008106,GO:0005829,GO:0009507,GO:0055114,GO:0016491
platyspermum	female-biased	OG0011947	ATMG00980	ID=ATMG00980;Note=Ribosomal protein S12/S23 family protein;Name=ATMG00980;curator_summary=ribosomal protein L2;symbol=RPSL2;computational_description=RPSL2%3B FUNCTIONS IN: structural constituent of ribosome%3B INVOLVED IN: translation%3B LOCATED IN: mitochondrial large ribosomal subunit%3B CONTAINS InterPro DOMAIN/s: Ribosomal protein S12/S23 (InterPro:IPR006032)%2C Nucleic acid-binding%2C OB-fo…	GO:0015935,GO:0005739,GO:0003735,GO:0005840,GO:0005762,GO:0006412,GO:0009507
platyspermum	female-biased	OG0011980	AT1G66910	ID=AT1G66910;Name=AT1G66910;Note=Protein kinase superfamily protein;computational_description=Protein kinase superfamily protein%3B FUNCTIONS IN: kinase activity%3B INVOLVED IN: protein amino acid phosphorylation%3B LOCATED IN: endomembrane system%3B CONTAINS InterPro DOMAIN/s: Protein kinase%2C ATP binding site (InterPro:IPR017441)%2C Serine/threonine-protein kinase domain (InterPro:IPR002290)%2…	GO:0016310,GO:0005576,GO:0016301
platyspermum	female-biased	OG0012041	AT4G24700	ID=AT4G24700;Name=AT4G24700;Note=hypothetical protein;computational_description=unknown protein%3B Has 20 Blast hits to 20 proteins in 7 species: Archae - 0%3B Bacteria - 0%3B Metazoa - 0%3B Fungi - 0%3B Plants - 20%3B Viruses - 0%3B Other Eukaryotes - 0 (source: NCBI BLink).;Dbxref=PMID:18650403,PMID:18989364,locus:2121919;locus_type=protein_coding	GO:0005575,GO:0003674,GO:0008150
platyspermum	female-biased	OG0012071	ATMG01130	ID=ATMG01130;Note=hypothetical protein;Name=ATMG01130;symbol=ORF106F;computational_description=FUNCTIONS IN: molecular_function unknown%3B INVOLVED IN: biological_process unknown%3B LOCATED IN: endomembrane system%3B EXPRESSED IN: 13 plant structures%3B EXPRESSED DURING: 7 growth stages.;Dbxref=locus:504954596;locus_type=protein_coding	GO:0008150,GO:0003674,GO:0005739
platyspermum	female-biased	OG0012357	ATMG01190	ID=ATMG01190;Note=ATP synthase subunit 1;Name=ATMG01190;curator_summary=ATPase subunit 1;symbol=ATP1;full_name=ATP synthase subunit 1;computational_description=ATP synthase subunit 1 (ATP1)%3B FUNCTIONS IN: copper ion binding%2C cobalt ion binding%2C zinc ion binding%3B INVOLVED IN: response to oxidative stress%3B LOCATED IN: mitochondrion%2C cell wall%3B EXPRESSED IN: cotyledon%2C guard cell%2C …	GO:0045261,GO:0015986,GO:0043531,GO:0046933,GO:0005618,GO:0050897,GO:0005739,GO:0005743,GO:0005753,GO:0009536,GO:0008270,GO:0016887,GO:0005886,GO:0005507,GO:0006979,GO:0005524,GO:0009507
platyspermum	female-biased	OG0012391
platyspermum	female-biased	OG0012415	AT4G15760	ID=AT4G15760;Name=AT4G15760;Note=monooxygenase 1;curator_summary=Encodes a protein with similarity to monooxygenases that are known to degrade salicylic acid (SA).;symbol=MO1;full_name=monooxygenase 1;computational_description=monooxygenase 1 (MO1)%3B FUNCTIONS IN: monooxygenase activity%3B INVOLVED IN: response to bacterium%3B LOCATED IN: endoplasmic reticulum%3B EXPRESSED IN: callus%3B CONTAINS…	GO:0004497,GO:0005783,GO:0009620,GO:0005739,GO:0071949,GO:0055114
platyspermum	female-biased	OG0012767	ATCG01280	ID=ATCG01280;Note=Chloroplast Ycf2%3BATPase%2C AAA type%2C core;Name=ATCG01280;symbol=YCF2.2;computational_description=YCF2.2%3B FUNCTIONS IN: nucleoside-triphosphatase activity%2C nucleotide binding%2C ATP binding%3B INVOLVED IN: biological_process unknown%3B LOCATED IN: chloroplast%3B CONTAINS InterPro DOMAIN/s: ATPase%2C AAA+ type%2C core (InterPro:IPR003593)%2C ATPase%2C AAA-type%2C core (Int…	GO:0009536,GO:0009570,GO:0005623,GO:0005622,GO:0005515,GO:0009507,GO:0005524,GO:0045037
platyspermum	female-biased	OG0013011	AT2G36530	ID=AT2G36530;Name=AT2G36530;Note=Enolase;curator_summary=Involved in light-dependent cold tolerance and encodes an enolase. Protein is tyrosine-phosphorylated and its phosphorylation state is modulated in response to ABA in Arabidopsis thaliana seeds.;symbol=LOS2;Alias=ENO2,ENOLASE 2;full_name=LOW EXPRESSION OF OSMOTICALLY RESPONSIVE GENES 2;computational_description=LOW EXPRESSION OF OSMOTICALLY…	GO:0005737,GO:0000015,GO:0005507,GO:0009737,GO:0005783,GO:0005829,GO:0000287,GO:0005739,GO:0004634,GO:0048046,GO:0046686,GO:0005740,GO:0005741,GO:0009416,GO:0005886,GO:0003677,GO:0009409,GO:0005634,GO:0006096,GO:0009506,GO:0009507
platyspermum	female-biased	OG0013495	AT1G80160	ID=AT1G80160;Name=AT1G80160;Note=Lactoylglutathione lyase / glyoxalase I family protein;symbol=GLYI7;full_name=glyoxylase I 7;computational_description=Lactoylglutathione lyase / glyoxalase I family protein%3B CONTAINS InterPro DOMAIN/s: Glyoxalase/bleomycin resistance protein/dioxygenase (InterPro:IPR004360)%3B BEST Arabidopsis thaliana protein match is: Lactoylglutathione lyase / glyoxalase I f…	GO:0005737,GO:0016829
platyspermum	female-biased	OG0013644	ATCG00140	ID=ATCG00140;Note=ATP synthase subunit C family protein;Name=ATCG00140;curator_summary=ATPase III subunit;symbol=ATPH;computational_description=ATPH%3B FUNCTIONS IN: hydrogen ion transmembrane transporter activity%3B INVOLVED IN: ATP synthesis coupled proton transport%3B LOCATED IN: chloroplast thylakoid membrane%3B EXPRESSED IN: 23 plant structures%3B EXPRESSED DURING: 13 growth stages%3B CONTAI…	GO:0009535,GO:0009534,GO:0045263,GO:0015986,GO:0046933,GO:0016021,GO:0008289,GO:0009507
platyspermum	female-biased	OG0014099	AT2G26460	ID=AT2G26460;Name=AT2G26460;Note=RED family protein;curator_summary=Encodes SMU2%2C a protein involved in RNA splicing.;symbol=SMU2;full_name=SUPPRESSORS OF MEC-8 AND UNC-52 2;computational_description=SUPPRESSORS OF MEC-8 AND UNC-52 2 (SMU2)%3B FUNCTIONS IN: molecular_function unknown%3B INVOLVED IN: RNA splicing%3B LOCATED IN: nucleus%3B EXPRESSED IN: 25 plant structures%3B EXPRESSED DURING: 14…	GO:0003674,GO:0005634,GO:0000381,GO:0008380
platyspermum	female-biased	OG0014918	AT4G04210	ID=AT4G04210;Name=AT4G04210;Note=plant UBX domain containing protein 4;curator_summary=Arabidopsis thaliana CDC48-interacting UBX-domain protein (PUX4);symbol=PUX4;full_name=plant UBX domain containing protein 4;computational_description=plant UBX domain containing protein 4 (PUX4)%3B INVOLVED IN: biological_process unknown%3B LOCATED IN: cellular_component unknown%3B EXPRESSED IN: 23 plant struc…	GO:0031468,GO:0007030,GO:0043161,GO:0005634,GO:0000045,GO:0061025,GO:0043130,GO:0051117,GO:0005829
platyspermum	female-biased	OG0015308
platyspermum	female-biased	OG0016344
platyspermum	female-biased	OG0016889	AT3G55620	ID=AT3G55620;Name=AT3G55620;Note=Translation initiation factor IF6;symbol=eIF6A;Alias=emb1624,embryo defective 1624;full_name=eukaryotic initiation facor 6A;computational_description=embryo defective 1624 (emb1624)%3B FUNCTIONS IN: ribosome binding%2C translation initiation factor activity%3B INVOLVED IN: translational initiation%2C embryo development ending in seed dormancy%3B LOCATED IN: nucleo…	GO:0000460,GO:0005730,GO:0005829,GO:0030687,GO:0005634,GO:0000054,GO:1902626,GO:0009793,GO:0000470,GO:0071215,GO:0043022,GO:0043023
platyspermum	female-biased	OG0016938	AT5G14920	ID=AT5G14920;Name=AT5G14920;Note=Gibberellin-regulated family protein;curator_summary=Encodes a GASA domain containing protein that regulates increases in plant growth through GA-induced and DELLA-dependent signal transduction and that can increase abiotic stress resistance by reducing ROS accumulation.;Alias=GASA14,A-stimulated in Arabidopsis 14;computational_description=Gibberellin-regulated fa…	GO:0009536,GO:0009737,GO:0009740,GO:0009739,GO:2000377,GO:0005576,GO:0005515,GO:0005886,GO:0009651
platyspermum	female-biased	OG0023777	AT2G42760	ID=AT2G42760;Name=AT2G42760;Note=DUF1685 family protein;computational_description=unknown protein%3B CONTAINS InterPro DOMAIN/s: Protein of unknown function DUF1685 (InterPro:IPR012881)%3B Has 170 Blast hits to 164 proteins in 34 species: Archae - 0%3B Bacteria - 1%3B Metazoa - 26%3B Fungi - 10%3B Plants - 107%3B Viruses - 0%3B Other Eukaryotes - 26 (source: NCBI BLink).;Dbxref=PMID:15720654,PMID…	GO:0003674,GO:0005634,GO:0008150
platyspermum	female-biased	OG0024240	AT3G57770	ID=AT3G57770;Name=AT3G57770;Note=Protein kinase superfamily protein;computational_description=Protein kinase superfamily protein%3B FUNCTIONS IN: protein serine/threonine kinase activity%2C protein kinase activity%2C kinase activity%2C ATP binding%3B INVOLVED IN: protein amino acid phosphorylation%3B LOCATED IN: cellular_component unknown%3B EXPRESSED IN: shoot%2C stem%3B CONTAINS InterPro DOMAIN…	GO:0016310
platyspermum	female-biased	OG0024248	AT4G36900	ID=AT4G36900;Name=AT4G36900;Note=related to AP2 10;curator_summary=encodes a member of the DREB subfamily A-5 of ERF/AP2 transcription factor family (RAP2.10). The protein contains one AP2 domain. There are 16 members in this subfamily including RAP2.9 and RAP2.1.;symbol=RAP2.10;Alias=DEAR4,DREB AND EAR MOTIF PROTEIN 4;full_name=related to AP2 10;computational_description=related to AP2 10 (RAP2.…	GO:0044212,GO:0003700,GO:0005634,GO:0009873,GO:0006355,GO:0003677
rubrum	male-biased	OG0000287	AT3G53480	ID=AT3G53480;Name=AT3G53480;Note=pleiotropic drug resistance 9;curator_summary=Negative regulator of auxin polar transport inhibitors. ABCG37 regulates auxin distribution and homeostasis in roots by excluding IBA from the root apex%2C but does not act directly in basipetal transport. ABCG37 and ABCG36 act redundantly at outermost root plasma membranes and%2C transport IBA out of the cells. Also i…	GO:0071366,GO:0042626,GO:0010329,GO:0016021,GO:0005739,GO:0048364,GO:0009926,GO:0005524,GO:0016887,GO:0005886,GO:0055085,GO:0009506
rubrum	male-biased	OG0000684	AT5G25610	ID=AT5G25610;Name=AT5G25610;Note=BURP domain-containing protein;curator_summary=responsive to dehydration 22 (RD22) mediated by ABA;symbol=RD22;Alias=ATRD22;full_name=RESPONSIVE TO DESSICATION 22;computational_description=RESPONSIVE TO DESSICATION 22 (RD22)%3B FUNCTIONS IN: nutrient reservoir activity%3B INVOLVED IN: response to desiccation%2C response to salt stress%2C response to abscisic acid …	GO:0005794,GO:0009737,GO:0005802,GO:0005576,GO:0045735,GO:0009269,GO:0009651,GO:0005768
rubrum	male-biased	OG0000793	AT1G55740	ID=AT1G55740;Name=AT1G55740;Note=seed imbibition 1;symbol=SIP1;Alias=AtSIP1,seed imbibition 1,RS1,raffinose synthase 1;full_name=seed imbibition 1;computational_description=seed imbibition 1 (SIP1)%3B CONTAINS InterPro DOMAIN/s: Glycoside hydrolase%2C catalytic core (InterPro:IPR017853)%2C Raffinose synthase (InterPro:IPR008811)%3B BEST Arabidopsis thaliana protein match is: seed imbibition 2 (TA…	GO:0047274,GO:0005737,GO:0005975
rubrum	male-biased	OG0001234	AT1G23090	ID=AT1G23090;Name=AT1G23090;Note=sulfate transporter 91;curator_summary=Encodes AST91 mRNA for sulfate transporter.;symbol=AST91;Alias=SULTR3%3B3;full_name=sulfate transporter 91;computational_description=sulfate transporter 91 (AST91)%3B FUNCTIONS IN: sulfate transmembrane transporter activity%3B INVOLVED IN: sulfate transport%2C transport%2C transmembrane transport%3B LOCATED IN: integral to me…	GO:0015301,GO:0015293,GO:0015116,GO:0008271,GO:0005887,GO:0009507
rubrum	male-biased	OG0003070	AT5G14940	ID=AT5G14940;Name=AT5G14940;Note=Major facilitator superfamily protein;computational_description=Major facilitator superfamily protein%3B FUNCTIONS IN: amino acid transmembrane transporter activity%2C transporter activity%3B INVOLVED IN: oligopeptide transport%2C response to nematode%3B LOCATED IN: membrane%3B EXPRESSED IN: 17 plant structures%3B EXPRESSED DURING: 9 growth stages%3B CONTAINS Inte…	GO:0016021,GO:0015333,GO:0009624,GO:1904680,GO:0015171,GO:0035673
rubrum	male-biased	OG0003075
rubrum	male-biased	OG0003179	AT1G75250	ID=AT1G75250;Name=AT1G75250;Note=RAD-like 6;symbol=RL6;Alias=ATRL6,RAD-like 6,RSM3,RADIALIS-LIKE SANT/MYB 3;full_name=RAD-like 6;computational_description=RAD-like 6 (RL6)%3B CONTAINS InterPro DOMAIN/s: SANT%2C DNA-binding (InterPro:IPR001005)%2C Molecular chaperone%2C heat shock protein%2C Hsp40%2C DnaJ (InterPro:IPR015609)%2C Homeodomain-like (InterPro:IPR009057)%3B BEST Arabidopsis thaliana pr…	GO:0003700,GO:0006355,GO:0005634,GO:0003677
rubrum	male-biased	OG0003574	AT2G25180	ID=AT2G25180;Name=AT2G25180;Note=response regulator 12;curator_summary=Encodes an Arabidopsis response regulator (ARR) protein that acts in concert with other type-B ARRs in the cytokinin signaling pathway. Also involved in cytokinin-dependent inhibition of hypocotyl elongation and cytokinin-dependent greening and shooting in tissue culture.;symbol=RR12;Alias=ARR12,response regulator 12,AtARR12;f…	GO:0005737,GO:0080036,GO:0080022,GO:0080113,GO:0009736,GO:0009735,GO:0003700,GO:0000160,GO:0000156,GO:0031537,GO:0071368,GO:0048367,GO:0010492,GO:0048364,GO:0010380,GO:0009414,GO:0003677,GO:0005634,GO:0010082
rubrum	male-biased	OG0004049	AT2G29970	ID=AT2G29970;Name=AT2G29970;Note=Double Clp-N motif-containing P-loop nucleoside triphosphate hydrolases superfamily protein;curator_summary=Encodes a member of an eight-gene family (SMAX1 and SMAX1-like) that has weak similarity to AtHSP101%2C a ClpB chaperonin required for thermotolerance.;Alias=SMXL7,SMAX1-like 7;computational_description=Double Clp-N motif-containing P-loop nucleoside triphos…	GO:0005737,GO:0019538,GO:0005634,GO:0005515
rubrum	male-biased	OG0004085	AT5G57260	ID=AT5G57260;Name=AT5G57260;Note=cytochrome P450%2C family 71%2C subfamily B%2C polypeptide 10;curator_summary=putative cytochrome P450;symbol=CYP71B10;full_name=cytochrome P450%2C family 71%2C subfamily B%2C polypeptide 10;computational_description=cytochrome P450%2C family 71%2C subfamily B%2C polypeptide 10 (CYP71B10)%3B FUNCTIONS IN: electron carrier activity%2C monooxygenase activity%2C iron…	GO:0020037,GO:0016709,GO:0016021,GO:0016020,GO:0005506,GO:0055114,GO:0009507
rubrum	male-biased	OG0004515	AT1G76990	ID=AT1G76990;Name=AT1G76990;Note=ACT domain repeat 3;symbol=ACR3;full_name=ACT domain repeat 3;computational_description=ACT domain repeat 3 (ACR3)%3B FUNCTIONS IN: amino acid binding%3B INVOLVED IN: nitrogen compound metabolic process%2C metabolic process%3B LOCATED IN: cytosol%3B EXPRESSED IN: 22 plant structures%3B EXPRESSED DURING: 13 growth stages%3B CONTAINS InterPro DOMAIN/s: Protein-PII u…	GO:0005829,GO:0016597
rubrum	male-biased	OG0006007	AT1G76130	ID=AT1G76130;Name=AT1G76130;Note=alpha-amylase-like 2;curator_summary=alpha-amylase%2C putative / 1%2C4-alpha-D-glucan glucanohydrolase%2C putative%2C strong similarity to alpha-amylase GI:7532799 from (Malus x domestica)%3Bcontains Pfam profile PF00128: Alpha amylase%2C catalytic domain. Predicted to be secreted based on SignalP analysis.;symbol=AMY2;Alias=ATAMY2,ARABIDOPSIS THALIANA ALPHA-AMYLA…	GO:0005975,GO:0005829,GO:0004556,GO:0005576,GO:0005509,GO:0103025
rubrum	male-biased	OG0006105	AT5G07050	ID=AT5G07050;Name=AT5G07050;Note=nodulin MtN21 /EamA-like transporter family protein;curator_summary=nodulin MtN21-like transporter family protein;symbol=UMAMIT9;full_name=Usually multiple acids move in and out Transporters 9;computational_description=nodulin MtN21 /EamA-like transporter family protein%3B LOCATED IN: membrane%3B CONTAINS InterPro DOMAIN/s: Protein of unknown function DUF6%2C tran…	GO:0022857,GO:0009507,GO:0016021,GO:0005886
rubrum	male-biased	OG0006462	AT4G24450	ID=AT4G24450;Name=AT4G24450;Note=phosphoglucan%2C water dikinase;symbol=PWD;Alias=ATGWD2,GWD3;full_name=phosphoglucan%2C water dikinase;computational_description=phosphoglucan%2C water dikinase (PWD)%3B FUNCTIONS IN: kinase activity%2C ATP binding%3B INVOLVED IN: phosphorylation%3B LOCATED IN: chloroplast envelope%3B EXPRESSED IN: 22 plant structures%3B EXPRESSED DURING: 14 growth stages%3B CONTA…	GO:0009941,GO:0005975,GO:0102218,GO:0102216,GO:0016310,GO:0046872,GO:0005524,GO:0009507
rubrum	male-biased	OG0006805	AT5G57520	ID=AT5G57520;Name=AT5G57520;Note=zinc finger protein 2;curator_summary=Encodes a zinc finger protein containing only a single zinc finger.;symbol=ZFP2;Alias=ATZFP2,ZINC FINGER PROTEIN 2;full_name=zinc finger protein 2;computational_description=zinc finger protein 2 (ZFP2)%3B FUNCTIONS IN: sequence-specific DNA binding transcription factor activity%2C zinc ion binding%2C nucleic acid binding%3B IN…	GO:0005515,GO:0003700,GO:0005634,GO:0006355,GO:0003676,GO:0060862,GO:0046872
rubrum	male-biased	OG0006946	AT2G39210	ID=AT2G39210;Name=AT2G39210;Note=Major facilitator superfamily protein;computational_description=Major facilitator superfamily protein%3B FUNCTIONS IN: molecular_function unknown%3B INVOLVED IN: transmembrane transport%3B LOCATED IN: cellular_component unknown%3B EXPRESSED IN: 22 plant structures%3B EXPRESSED DURING: 13 growth stages%3B CONTAINS InterPro DOMAIN/s: Nodulin-like (InterPro:IPR010658…	GO:0016021,GO:0050832,GO:0003674,GO:0055085,GO:0009506,GO:0009507
rubrum	male-biased	OG0007754	AT3G23560	ID=AT3G23560;Name=AT3G23560;Note=MATE efflux family protein;curator_summary=Member of the multidrug and toxic compound extrusion (MATE) family%2C protects roots from inhibitory compounds.;symbol=ALF5;full_name=ABERRANT LATERAL ROOT FORMATION 5;computational_description=ABERRANT LATERAL ROOT FORMATION 5 (ALF5)%3B FUNCTIONS IN: antiporter activity%2C drug transmembrane transporter activity%2C trans…	GO:0015297,GO:0016021,GO:0016020,GO:0009636,GO:0022857,GO:0042910,GO:0005886,GO:0055085
rubrum	male-biased	OG0008639	AT1G74110	ID=AT1G74110;Name=AT1G74110;Note=cytochrome P450%2C family 78%2C subfamily A%2C polypeptide 10;curator_summary=member of CYP78A;symbol=CYP78A10;full_name=cytochrome P450%2C family 78%2C subfamily A%2C polypeptide 10;computational_description=cytochrome P450%2C family 78%2C subfamily A%2C polypeptide 10 (CYP78A10)%3B FUNCTIONS IN: electron carrier activity%2C monooxygenase activity%2C iron ion bin…	GO:0020037,GO:0016709,GO:0016021,GO:0016020,GO:0005506,GO:0055114,GO:0009507
rubrum	male-biased	OG0009101	AT4G37480	ID=AT4G37480;Name=AT4G37480;Note=Chaperone DnaJ-domain superfamily protein;computational_description=Chaperone DnaJ-domain superfamily protein%3B FUNCTIONS IN: heat shock protein binding%3B INVOLVED IN: protein folding%3B LOCATED IN: mitochondrion%3B EXPRESSED IN: 22 plant structures%3B EXPRESSED DURING: 13 growth stages%3B CONTAINS InterPro DOMAIN/s: Molecular chaperone%2C heat shock protein%2C …	GO:0005575,GO:0008150,GO:0003674
rubrum	male-biased	OG0009977	AT5G22860	ID=AT5G22860;Name=AT5G22860;Note=Serine carboxypeptidase S28 family protein;computational_description=Serine carboxypeptidase S28 family protein%3B FUNCTIONS IN: serine-type peptidase activity%2C peptidase activity%3B INVOLVED IN: proteolysis%3B LOCATED IN: endomembrane system%3B EXPRESSED IN: 22 plant structures%3B EXPRESSED DURING: 13 growth stages%3B CONTAINS InterPro DOMAIN/s: Peptidase S28 (…	GO:0004180,GO:0008239,GO:0005576,GO:0006508,GO:0008236,GO:0009507
rubrum	male-biased	OG0010324	AT5G02070	ID=AT5G02070;Name=AT5G02070;Note=Protein kinase family protein;computational_description=Protein kinase family protein%3B FUNCTIONS IN: kinase activity%3B INVOLVED IN: protein amino acid phosphorylation%3B CONTAINS InterPro DOMAIN/s: Protein kinase%2C ATP binding site (InterPro:IPR017441)%2C Protein kinase%2C catalytic domain (InterPro:IPR000719)%2C Serine/threonine-protein kinase-like domain (In…	GO:0006468,GO:0016021,GO:0016301,GO:0030247,GO:0004674,GO:0007166,GO:0005886,GO:0005524
rubrum	male-biased	OG0010447	AT2G45910	ID=AT2G45910;Name=AT2G45910;Note=U-box domain-containing protein kinase family protein;computational_description=U-box domain-containing protein kinase family protein%3B FUNCTIONS IN: ubiquitin-protein ligase activity%2C protein serine/threonine kinase activity%2C protein kinase activity%2C kinase activity%2C ATP binding%3B INVOLVED IN: protein amino acid phosphorylation%2C response to stress%2C …	GO:0006468,GO:0016567,GO:0005634,GO:0004674,GO:0004842,GO:0005829,GO:0005524
rubrum	male-biased	OG0011509	AT5G60770	ID=AT5G60770;Name=AT5G60770;Note=nitrate transporter 2.4;curator_summary=member of High affinity nitrate transporter family;symbol=NRT2.4;Alias=ATNRT2.4,ARABIDOPSIS THALIANA NITRATE TRANSPORTER 2.4;full_name=nitrate transporter 2.4;computational_description=nitrate transporter 2.4 (NRT2.4)%3B FUNCTIONS IN: nitrate transmembrane transporter activity%3B INVOLVED IN: transmembrane transport%3B CONTA…	GO:0071249,GO:0016021,GO:0042128,GO:0015112,GO:0005886,GO:0009705,GO:0055085,GO:0015706
rubrum	male-biased	OG0012035	AT1G03600	ID=AT1G03600;Name=AT1G03600;Note=photosystem II family protein;symbol=PSB27;computational_description=PSB27%3B FUNCTIONS IN: molecular_function unknown%3B INVOLVED IN: photosystem II repair%3B LOCATED IN: thylakoid%2C chloroplast thylakoid membrane%2C chloroplast thylakoid lumen%2C chloroplast photosystem II%2C chloroplast%3B EXPRESSED IN: 23 plant structures%3B EXPRESSED DURING: 13 growth stages…	GO:0009535,GO:0009534,GO:0071484,GO:0010206,GO:0010207,GO:0009543,GO:0005576,GO:0009579,GO:0009507
rubrum	male-biased	OG0012245	AT5G16740	ID=AT5G16740;Name=AT5G16740;Note=Transmembrane amino acid transporter family protein;computational_description=Transmembrane amino acid transporter family protein%3B CONTAINS InterPro DOMAIN/s: Amino acid transporter%2C transmembrane (InterPro:IPR013057)%3B BEST Arabidopsis thaliana protein match is: Transmembrane amino acid transporter family protein (TAIR:AT5G02170.1)%3B Has 1807 Blast hits to …	GO:0003333,GO:0016021,GO:0005886,GO:0015171,GO:0005774
rubrum	male-biased	OG0012761	AT4G19840	ID=AT4G19840;Name=AT4G19840;Note=phloem protein 2-A1;curator_summary=encodes a phloem lectin%2C similar to phloem lectin in cucumber and celery. Gene is expressed in the phloem%2C predominantly in the companion cells.;symbol=PP2-A1;Alias=ATPP2-A1,phloem protein 2-A1,ATPP2A-1,phloem protein 2-A1;full_name=phloem protein 2-A1;computational_description=phloem protein 2-A1 (PP2-A1)%3B BEST Arabidopsi…	GO:0043394,GO:0009625,GO:0030246
rubrum	female-biased	OG0000021	AT1G78380	ID=AT1G78380;Name=AT1G78380;Note=glutathione S-transferase TAU 19;curator_summary=Encodes a glutathione transferase that is a member of Tau GST gene family. Expression is induced by drought stress%2C oxidative stress%2C and high doses of auxin and cytokinin. naming convention according to Wagner et al. (2002) The expression of this gene is upregulated by herbicide safeners such as benoxacor and f…	GO:0005737,GO:0004364,GO:0006749,GO:0009570,GO:0005829,GO:0005774,GO:0005739,GO:0006979,GO:0009407,GO:0005886,GO:0046686,GO:0042631,GO:0009507,GO:0004601,GO:0055114,GO:0043295
rubrum	female-biased	OG0000080	AT1G76160	ID=AT1G76160;Name=AT1G76160;Note=SKU5 similar 5;symbol=sks5;full_name=SKU5 similar 5;computational_description=SKU5 similar 5 (sks5)%3B FUNCTIONS IN: oxidoreductase activity%2C copper ion binding%3B INVOLVED IN: oxidation reduction%3B LOCATED IN: apoplast%2C cell wall%2C plant-type cell wall%3B EXPRESSED IN: 24 plant structures%3B EXPRESSED DURING: 13 growth stages%3B CONTAINS InterPro DOMAIN/s: …	GO:0016491,GO:0099503,GO:0005618,GO:0004322,GO:0048046,GO:0055072,GO:0006826,GO:0055114,GO:0005886,GO:0005507,GO:0009506,GO:0005576
rubrum	female-biased	OG0000094
rubrum	female-biased	OG0000181	AT4G11050	ID=AT4G11050;Name=AT4G11050;Note=glycosyl hydrolase 9C3;symbol=GH9C3;Alias=AtGH9C3,glycosyl hydrolase 9C3;full_name=glycosyl hydrolase 9C3;computational_description=glycosyl hydrolase 9C3 (GH9C3)%3B FUNCTIONS IN: carbohydrate binding%2C hydrolase activity%2C hydrolyzing O-glycosyl compounds%2C catalytic activity%3B INVOLVED IN: carbohydrate metabolic process%3B LOCATED IN: endomembrane system%2C …	GO:0071555,GO:0005576,GO:0008810,GO:0030245,GO:0030246
rubrum	female-biased	OG0000207	AT4G13710	ID=AT4G13710;Name=AT4G13710;Note=Pectin lyase-like superfamily protein;computational_description=Pectin lyase-like superfamily protein%3B FUNCTIONS IN: lyase activity%2C pectate lyase activity%3B INVOLVED IN: biological_process unknown%3B LOCATED IN: endomembrane system%3B EXPRESSED IN: 20 plant structures%3B EXPRESSED DURING: 6 growth stages%3B CONTAINS InterPro DOMAIN/s: Pectin lyase fold/virul…	GO:0030570,GO:0045490,GO:0005576,GO:0016829,GO:0046872
rubrum	female-biased	OG0000208	AT2G39700	ID=AT2G39700;Name=AT2G39700;Note=expansin A4;curator_summary=putative expansin. Naming convention from the Expansin Working Group (Kende et al%2C 2004. Plant Mol Bio). Involved in the formation of nematode-induced syncytia in roots of Arabidopsis thaliana.;symbol=EXPA4;Alias=ATEXP4,ATEXPA4,expansin A4,ATHEXP ALPHA 1.6;full_name=expansin A4;computational_description=expansin A4 (EXPA4)%3B CONTAINS…	GO:0009664,GO:0009826,GO:0005829,GO:0016020,GO:0009828,GO:0005576,GO:0006949,GO:0009505,GO:0009506
rubrum	female-biased	OG0000355	AT5G49040	ID=AT5G49040;Name=AT5G49040;Note=Disease resistance-responsive (dirigent-like protein) family protein;computational_description=Disease resistance-responsive (dirigent-like protein) family protein%3B FUNCTIONS IN: molecular_function unknown%3B INVOLVED IN: lignan biosynthetic process%2C defense response%3B LOCATED IN: endomembrane system%3B CONTAINS InterPro DOMAIN/s: Plant disease resistance res…	GO:0048046,GO:0009507
rubrum	female-biased	OG0000574	AT5G12020	ID=AT5G12020;Name=AT5G12020;Note=17.6 kDa class II heat shock protein;symbol=HSP17.6II;full_name=17.6 kDa class II heat shock protein;computational_description=17.6 kDa class II heat shock protein (HSP17.6II)%3B CONTAINS InterPro DOMAIN/s: Heat shock protein Hsp20 (InterPro:IPR002068)%2C HSP20-like chaperone (InterPro:IPR008978)%3B BEST Arabidopsis thaliana protein match is: heat shock protein 17…	GO:0005737,GO:0051259,GO:0006457,GO:0009651,GO:0051082,GO:0000302,GO:0071456,GO:0009408,GO:0043621
rubrum	female-biased	OG0000618	AT2G38110	ID=AT2G38110;Name=AT2G38110;Note=glycerol-3-phosphate acyltransferase 6;curator_summary=bifunctional sn-glycerol-3-phosphate 2-O-acyltransferase/phosphatase. Involved in cutin assembly.;symbol=GPAT6;Alias=ATGPAT6,GLYCEROL-3-PHOSPHATE sn-2-ACYLTRANSFERASE 6;full_name=GLYCEROL-3-PHOSPHATE sn-2-ACYLTRANSFERASE 6;computational_description=glycerol-3-phosphate acyltransferase 6 (GPAT6)%3B CONTAINS Int…	GO:0010143,GO:0016791,GO:0008654,GO:0016021,GO:0016020,GO:0102419,GO:0005739,GO:0090447,GO:0009908
rubrum	female-biased	OG0000731	AT1G53540	ID=AT1G53540;Name=AT1G53540;Note=HSP20-like chaperones superfamily protein;computational_description=HSP20-like chaperones superfamily protein%3B CONTAINS InterPro DOMAIN/s: Heat shock protein Hsp20 (InterPro:IPR002068)%2C HSP20-like chaperone (InterPro:IPR008978)%3B BEST Arabidopsis thaliana protein match is: heat shock protein 17.4 (TAIR:AT3G46230.1)%3B Has 7090 Blast hits to 7089 proteins in 1…	GO:0005737,GO:0051259,GO:0006457,GO:0051082,GO:0000302,GO:0009408,GO:0009651,GO:0043621
rubrum	female-biased	OG0000761	AT2G45130	ID=AT2G45130;Name=AT2G45130;Note=SPX domain protein 3;curator_summary=Expression is upregulated in the shoot of cax1/cax3 mutant.;symbol=SPX3;Alias=ATSPX3,ARABIDOPSIS THALIANA SPX DOMAIN GENE 3;full_name=SPX domain gene 3;computational_description=SPX domain gene 3 (SPX3)%3B CONTAINS InterPro DOMAIN/s: SPX%2C N-terminal (InterPro:IPR004331)%3B BEST Arabidopsis thaliana protein match is: SPX domai…	GO:0005737,GO:0080040,GO:0016036
rubrum	female-biased	OG0000965	AT2G42200	ID=AT2G42200;Name=AT2G42200;Note=squamosa promoter binding protein-like 9;curator_summary=Encodes a putative transcriptional regulator that is involved in the vegetative to reproductive phase transition. Expression is regulated by MIR156b. SPL activity nonautonomously inhibits initiation of new leaves at the shoot apical meristem.;symbol=SPL9;Alias=AtSPL9;full_name=squamosa promoter binding prote…	GO:0005737,GO:0006355,GO:0003700,GO:0005634,GO:0003677,GO:0048366,GO:2000025,GO:0010228,GO:0046872,GO:0048653
rubrum	female-biased	OG0000996	AT1G02205	ID=AT1G02205;Name=AT1G02205;Note=Fatty acid hydroxylase superfamily;curator_summary=Expression of the CER1 gene associated with production of stem epicuticular wax and pollen fertility. Biochemical studies showed that cer1 mutants are blocked in the conversion of stem wax C30 aldehydes to C29 alkanes%2C and they also lack the secondary alcohols and ketones. These suggested the CER1 protein is an …	GO:0042335,GO:0046185,GO:0016020,GO:0005739,GO:0050832,GO:0042742,GO:0009414,GO:0010025,GO:0043447,GO:0071771,GO:0016491
rubrum	female-biased	OG0001351	AT1G72770	ID=AT1G72770;Name=AT1G72770;Note=HYPERSENSITIVE TO ABA1;curator_summary=mutant has ABA hypersensitive inhibition of seed germination%3B Protein Phosphatase 2C%3B regulates the activation of the Snf1-related kinase OST1 by abscisic acid.;symbol=HAB1;Alias=AtHAB1;full_name=HYPERSENSITIVE TO ABA1;computational_description=homology to ABI1 (HAB1)%3B FUNCTIONS IN: protein serine/threonine phosphatase …	GO:0009738,GO:0006470,GO:0005829,GO:0004724,GO:0004722,GO:0005515,GO:0046872,GO:0005634,GO:0009507
rubrum	female-biased	OG0001403	AT1G04680	ID=AT1G04680;Name=AT1G04680;Note=Pectin lyase-like superfamily protein;computational_description=Pectin lyase-like superfamily protein%3B FUNCTIONS IN: lyase activity%2C pectate lyase activity%3B INVOLVED IN: biological_process unknown%3B LOCATED IN: membrane%3B EXPRESSED IN: 23 plant structures%3B EXPRESSED DURING: 13 growth stages%3B CONTAINS InterPro DOMAIN/s: Pectin lyase fold/virulence facto…	GO:0030570,GO:0045490,GO:0046872,GO:0016829,GO:0005576
rubrum	female-biased	OG0001553	AT1G78170	ID=AT1G78170;Name=AT1G78170;Note=E3 ubiquitin-protein ligase;computational_description=unknown protein%3B BEST Arabidopsis thaliana protein match is: unknown protein (TAIR:AT1G22250.1)%3B Has 66 Blast hits to 66 proteins in 11 species: Archae - 0%3B Bacteria - 0%3B Metazoa - 0%3B Fungi - 0%3B Plants - 66%3B Viruses - 0%3B Other Eukaryotes - 0 (source: NCBI BLink).;Dbxref=PMID:17227549,PMID:186504…	GO:0005634,GO:0008150
rubrum	female-biased	OG0001712	AT1G69120	ID=AT1G69120;Name=AT1G69120;Note=K-box region and MADS-box transcription factor family protein;curator_summary=Floral homeotic gene encoding a MADS domain protein homologous to SRF transcription factors. Specifies floral meristem and sepal identity. Required for the transcriptional activation of AGAMOUS. Interacts with LEAFY.Binds to promoter and regulates the expression of flowering time genes S…	GO:0010582,GO:0044212,GO:0010076,GO:0043565,GO:0003700,GO:0008134,GO:0030154,GO:0007275,GO:0009933,GO:0045944,GO:0045893,GO:0005515,GO:0003677,GO:0000976,GO:0046982,GO:0009908,GO:0005634,GO:0000981,GO:0000977
rubrum	female-biased	OG0001776	AT3G07880	ID=AT3G07880;Name=AT3G07880;Note=Immunoglobulin E-set superfamily protein;symbol=SCN1;full_name=SUPERCENTIPEDE1;computational_description=SUPERCENTIPEDE1 (SCN1)%3B FUNCTIONS IN: Rho GDP-dissociation inhibitor activity%3B INVOLVED IN: root epidermal cell differentiation%2C cell tip growth%3B LOCATED IN: cytoplasm%3B EXPRESSED IN: 25 plant structures%3B EXPRESSED DURING: 15 growth stages%3B CONTAIN…	GO:0005737,GO:0010053,GO:0005829,GO:0016020,GO:0005096,GO:0005094,GO:0048365,GO:0009932,GO:0005515,GO:0007266
rubrum	female-biased	OG0001831	AT5G25190	ID=AT5G25190;Name=AT5G25190;Note=Integrase-type DNA-binding superfamily protein;curator_summary=encodes a member of the ERF (ethylene response factor) subfamily B-6 of ERF/AP2 transcription factor family. The protein contains one AP2 domain. There are 12 members in this subfamily including RAP2.11.;symbol=ESE3;full_name=ethylene and salt inducible 3;computational_description=Integrase-type DNA-bi…	GO:0003700,GO:0005634,GO:0003677,GO:0005622,GO:0006355,GO:0009873
rubrum	female-biased	OG0001956	AT4G27280	ID=AT4G27280;Name=AT4G27280;Note=Calcium-binding EF-hand family protein;computational_description=Calcium-binding EF-hand family protein%3B FUNCTIONS IN: calcium ion binding%3B INVOLVED IN: response to karrikin%3B EXPRESSED IN: 23 plant structures%3B EXPRESSED DURING: 13 growth stages%3B CONTAINS InterPro DOMAIN/s: EF-Hand 1%2C calcium-binding site (InterPro:IPR018247)%2C EF-HAND 2 (InterPro:IPR0…	GO:0009733,GO:0080167,GO:0071456,GO:0005509,GO:0005515,GO:0005886
rubrum	female-biased	OG0002455
rubrum	female-biased	OG0002475	AT4G37540	ID=AT4G37540;Name=AT4G37540;Note=LOB domain-containing protein 39;symbol=LBD39;full_name=LOB domain-containing protein 39;computational_description=LOB domain-containing protein 39 (LBD39)%3B CONTAINS InterPro DOMAIN/s: Lateral organ boundaries%2C LOB (InterPro:IPR004883)%3B BEST Arabidopsis thaliana protein match is: LOB domain-containing protein 38 (TAIR:AT3G49940.1)%3B Has 571 Blast hits to 57…	GO:0005575,GO:0010468
rubrum	female-biased	OG0002515	AT4G13710	ID=AT4G13710;Name=AT4G13710;Note=Pectin lyase-like superfamily protein;computational_description=Pectin lyase-like superfamily protein%3B FUNCTIONS IN: lyase activity%2C pectate lyase activity%3B INVOLVED IN: biological_process unknown%3B LOCATED IN: endomembrane system%3B EXPRESSED IN: 20 plant structures%3B EXPRESSED DURING: 6 growth stages%3B CONTAINS InterPro DOMAIN/s: Pectin lyase fold/virul…	GO:0030570,GO:0045490,GO:0005576,GO:0016829,GO:0046872
rubrum	female-biased	OG0002586	AT3G19690	ID=AT3G19690;Name=AT3G19690;Note=CAP (Cysteine-rich secretory proteins%2C Antigen 5%2C and Pathogenesis-related 1 protein) superfamily protein;computational_description=CAP (Cysteine-rich secretory proteins%2C Antigen 5%2C and Pathogenesis-related 1 protein) superfamily protein%3B FUNCTIONS IN: molecular_function unknown%3B INVOLVED IN: biological_process unknown%3B LOCATED IN: endomembrane syste…	GO:0008150,GO:0005576,GO:0003674,GO:0005615
rubrum	female-biased	OG0002630	AT1G29140	ID=AT1G29140;Name=AT1G29140;Note=Pollen Ole e 1 allergen and extensin family protein;computational_description=Pollen Ole e 1 allergen and extensin family protein%3B FUNCTIONS IN: molecular_function unknown%3B INVOLVED IN: biological_process unknown%3B LOCATED IN: endomembrane system%3B EXPRESSED IN: 9 plant structures%3B EXPRESSED DURING: L mature pollen stage%2C M germinated pollen stage%2C 4 a…	GO:0003674,GO:0005576,GO:0008150
rubrum	female-biased	OG0002748	AT5G45670	ID=AT5G45670;Name=AT5G45670;Note=GDSL-like Lipase/Acylhydrolase superfamily protein;computational_description=GDSL-like Lipase/Acylhydrolase superfamily protein%3B FUNCTIONS IN: hydrolase activity%2C acting on ester bonds%2C carboxylesterase activity%3B INVOLVED IN: lipid metabolic process%3B LOCATED IN: endomembrane system%3B EXPRESSED IN: 19 plant structures%3B EXPRESSED DURING: 13 growth stage…	GO:0005576,GO:0016788,GO:0016042
rubrum	female-biased	OG0003374	AT5G04660	ID=AT5G04660;Name=AT5G04660;Note=cytochrome P450%2C family 77%2C subfamily A%2C polypeptide 4;curator_summary=encodes a protein with cytochrome P450 domain;symbol=CYP77A4;full_name=cytochrome P450%2C family 77%2C subfamily A%2C polypeptide 4;computational_description=cytochrome P450%2C family 77%2C subfamily A%2C polypeptide 4 (CYP77A4)%3B FUNCTIONS IN: electron carrier activity%2C monooxygenase …	GO:0020037,GO:0016709,GO:0016021,GO:0016020,GO:0019395,GO:0005506,GO:0009507
rubrum	female-biased	OG0004467	AT3G08030	ID=AT3G08030;Name=AT3G08030;Note=DNA-directed RNA polymerase subunit beta (Protein of unknown function%2C DUF642);curator_summary=The mRNA of this gene is expressed in viable seeds. Its detection in a dry seed lot has potential for use as a molecular marker for germination performance as absence of expression correlates with decreased germination.;computational_description=Protein of unknown func…	GO:0099503,GO:0005618,GO:0005643,GO:0003674,GO:0005886,GO:0008150,GO:0009507
rubrum	female-biased	OG0004613	AT1G10630	ID=AT1G10630;Name=AT1G10630;Note=ADP-ribosylation factor A1F;curator_summary=A member of ARF GTPase family. A thaliana has 21 members of this family%2C known to be essential for vesicle coating and uncoating and functions in GTP-binding. Gene encoding ADP-ribosylation factor and similar to other ARFs and ARF-like proteins. The gene is shown to play a role in cell division%2C cell expansion and ce…	GO:0005737,GO:0005794,GO:0016192,GO:0005829,GO:0006499,GO:0005774,GO:0005576,GO:0016004,GO:0005886,GO:0005507,GO:0006886,GO:0005525
rubrum	female-biased	OG0004945	ATMG00860	ID=ATMG00860;Note=DNA/RNA polymerases superfamily protein;Name=ATMG00860;symbol=ORF158;computational_description=DNA/RNA polymerases superfamily protein.;Dbxref=locus:504954569;locus_type=protein_coding	GO:0003674,GO:0008150,GO:0005739
rubrum	female-biased	OG0005580	AT1G70210	ID=AT1G70210;Name=AT1G70210;Note=CYCLIN D1%3B1;curator_summary=Encodes a D-type cyclin that physically interacts with CDC2A. Its expression is upregulated early during germination.;symbol=CYCD1%3B1;Alias=ATCYCD1%3B1;full_name=CYCLIN D1%3B1;computational_description=CYCLIN D1%3B1 (CYCD1%3B1)%3B FUNCTIONS IN: cyclin-dependent protein kinase regulator activity%3B INVOLVED IN: G1 phase of mitotic cel…	GO:0005737,GO:0000079,GO:0019901,GO:0016538,GO:0044772,GO:0005515,GO:0004672,GO:0005634,GO:0000307,GO:0051301
rubrum	female-biased	OG0005902	AT2G39730	ID=AT2G39730;Name=AT2G39730;Note=rubisco activase;curator_summary=Rubisco activase%2C a nuclear-encoded chloroplast protein that consists of two isoforms arising from alternative splicing in most plants. Required for the light activation of rubisco. Involved in jasmonate-induced leaf senescence.;symbol=RCA;full_name=rubisco activase;computational_description=rubisco activase (RCA)%3B FUNCTIONS IN…	GO:0009535,GO:0009941,GO:0010319,GO:0043531,GO:0009753,GO:0010150,GO:0005618,GO:0009570,GO:0010287,GO:0048046,GO:0009416,GO:0042742,GO:0005794,GO:0009409,GO:0046863,GO:0009579,GO:0030234,GO:0005634,GO:0005524,GO:0009507
rubrum	female-biased	OG0006753
rubrum	female-biased	OG0007603	AT4G20760	ID=AT4G20760;Name=AT4G20760;Note=NAD(P)-binding Rossmann-fold superfamily protein;computational_description=NAD(P)-binding Rossmann-fold superfamily protein%3B FUNCTIONS IN: oxidoreductase activity%2C binding%2C catalytic activity%3B INVOLVED IN: oxidation reduction%2C metabolic process%3B EXPRESSED IN: 22 plant structures%3B EXPRESSED DURING: 13 growth stages%3B CONTAINS InterPro DOMAIN/s: NAD(P…	GO:0005829,GO:0055114,GO:0005739,GO:0009507
rubrum	female-biased	OG0007609	AT3G07090	ID=AT3G07090;Name=AT3G07090;Note=PPPDE putative thiol peptidase family protein;computational_description=PPPDE putative thiol peptidase family protein%3B CONTAINS InterPro DOMAIN/s: Protein of unknown function DUF862%2C eukaryotic (InterPro:IPR008580)%3B BEST Arabidopsis thaliana protein match is: PPPDE putative thiol peptidase family protein (TAIR:AT5G25170.1)%3B Has 872 Blast hits to 872 protei…	GO:0005737,GO:0008150,GO:0005634,GO:0003674
rubrum	female-biased	OG0008133	AT1G49430	ID=AT1G49430;Name=AT1G49430;Note=long-chain acyl-CoA synthetase 2;curator_summary=Encodes a long chain acyl-CoA synthetase that catalyzes the synthesis of omega-hydroxy fatty acyl-CoA intermediates in the pathway to cutin synthesis. Required for repression of lateral root formation.;symbol=LACS2;Alias=LRD2,LATERAL ROOT DEVELOPMENT 2;full_name=long-chain acyl-CoA synthetase 2;computational_descrip…	GO:0006633,GO:0010143,GO:0006631,GO:0005783,GO:0102391,GO:0031957,GO:0010311,GO:0050832,GO:0004467,GO:0009506,GO:0010025,GO:0003996,GO:0005524,GO:0009507
rubrum	female-biased	OG0008154
rubrum	female-biased	OG0008915	AT2G04032	ID=AT2G04032;Name=AT2G04032;Note=zinc transporter 7 precursor;symbol=ZIP7;full_name=zinc transporter 7 precursor;computational_description=zinc transporter 7 precursor (ZIP7)%3B FUNCTIONS IN: cation transmembrane transporter activity%2C zinc ion transmembrane transporter activity%2C metal ion transmembrane transporter activity%3B INVOLVED IN: cation transport%2C zinc ion transport%2C metal ion tr…	GO:0016021,GO:0016020,GO:0005385,GO:0071577,GO:0005886,GO:0009507
rubrum	female-biased	OG0008933	AT2G15220	ID=AT2G15220;Name=AT2G15220;Note=Plant basic secretory protein (BSP) family protein;computational_description=Plant basic secretory protein (BSP) family protein%3B INVOLVED IN: defense response%3B LOCATED IN: endomembrane system%3B EXPRESSED DURING: seedling growth%3B CONTAINS InterPro DOMAIN/s: Uncharacterised protein family%2C basic secretory protein (InterPro:IPR007541)%3B BEST Arabidopsis tha…	GO:0005576
rubrum	female-biased	OG0009162	AT4G35750	ID=AT4G35750;Name=AT4G35750;Note=SEC14 cytosolic factor family protein / phosphoglyceride transfer family protein;computational_description=SEC14 cytosolic factor family protein / phosphoglyceride transfer family protein%3B CONTAINS InterPro DOMAIN/s: Cellular retinaldehyde-binding/triple function%2C C-terminal (InterPro:IPR001251)%3B BEST Arabidopsis thaliana protein match is: SEC14 cytosolic fa…	GO:0005737,GO:0008150,GO:0003674
rubrum	female-biased	OG0009217	AT2G15780	ID=AT2G15780;Name=AT2G15780;Note=Cupredoxin superfamily protein;computational_description=Cupredoxin superfamily protein%3B FUNCTIONS IN: electron carrier activity%2C copper ion binding%3B LOCATED IN: endomembrane system%3B CONTAINS InterPro DOMAIN/s: Plastocyanin-like (InterPro:IPR003245)%2C Cupredoxin (InterPro:IPR008972)%3B BEST Arabidopsis thaliana protein match is: Cupredoxin superfamily pro…	GO:0005576,GO:0009055
rubrum	female-biased	OG0009248	AT2G39730	ID=AT2G39730;Name=AT2G39730;Note=rubisco activase;curator_summary=Rubisco activase%2C a nuclear-encoded chloroplast protein that consists of two isoforms arising from alternative splicing in most plants. Required for the light activation of rubisco. Involved in jasmonate-induced leaf senescence.;symbol=RCA;full_name=rubisco activase;computational_description=rubisco activase (RCA)%3B FUNCTIONS IN…	GO:0009535,GO:0009941,GO:0010319,GO:0043531,GO:0009753,GO:0010150,GO:0005618,GO:0009570,GO:0010287,GO:0048046,GO:0009416,GO:0042742,GO:0005794,GO:0009409,GO:0046863,GO:0009579,GO:0030234,GO:0005634,GO:0005524,GO:0009507
rubrum	female-biased	OG0009275	AT1G48910	ID=AT1G48910;Name=AT1G48910;Note=Flavin-containing monooxygenase family protein;curator_summary=A paternally expressed imprinted gene.;symbol=YUC10;full_name=YUCCA 10;computational_description=YUC10%3B FUNCTIONS IN: NADP or NADPH binding%2C oxidoreductase activity%2C monooxygenase activity%2C FAD binding%2C flavin-containing monooxygenase activity%3B INVOLVED IN: regulation of anatomical structur…	GO:0050661,GO:0050660,GO:0103075,GO:0022603,GO:0004499,GO:0009723,GO:0009507
rubrum	female-biased	OG0009750	AT5G54250	ID=AT5G54250;Name=AT5G54250;Note=cyclic nucleotide-gated cation channel 4;curator_summary=member of Cyclic nucleotide gated channel family%2C downstream component of the signaling pathways leading to HR resistance. mutant plants exhibit gene-for-gene disease resistance against avirulent Pseudomonas syringae despite the near-complete absence of the hypersensitive response (HR). Salicylic acid accu…	GO:0030553,GO:0030552,GO:0016020,GO:0005216,GO:0008324,GO:0009626,GO:0005516,GO:0005886,GO:0016021
rubrum	female-biased	OG0010074	AT3G10185	ID=AT3G10185;Name=AT3G10185;Note=Gibberellin-regulated family protein;curator_summary=Encodes a Gibberellin-regulated GASA/GAST/Snakin family protein;computational_description=Gibberellin-regulated family protein%3B LOCATED IN: endomembrane system%3B CONTAINS InterPro DOMAIN/s: Gibberellin regulated protein (InterPro:IPR003854)%3B BEST Arabidopsis thaliana protein match is: Gibberellin-regulated …	GO:0005576,GO:0009740
rubrum	female-biased	OG0010105	AT1G15380	ID=AT1G15380;Name=AT1G15380;Note=Lactoylglutathione lyase / glyoxalase I family protein;symbol=GLYI4;full_name=glyoxylase I 4;computational_description=Lactoylglutathione lyase / glyoxalase I family protein%3B CONTAINS InterPro DOMAIN/s: Glyoxalase/bleomycin resistance protein/dioxygenase (InterPro:IPR004360)%3B BEST Arabidopsis thaliana protein match is: Lactoylglutathione lyase / glyoxalase I f…	GO:0005737,GO:2000031,GO:0016829,GO:0009787,GO:2000022
rubrum	female-biased	OG0010177	AT3G14310	ID=AT3G14310;Name=AT3G14310;Note=pectin methylesterase 3;curator_summary=encodes a pectin methylesterase%2C targeted by a cellulose binding protein (CBP) from the parasitic nematode Heterodera schachtii during parasitism.;symbol=PME3;Alias=ATPME3,pectin methylesterase 3,OZS2,OVERLY ZINC SENSITIVE 2;full_name=pectin methylesterase 3;computational_description=pectin methylesterase 3 (PME3)%3B FUNCT…	GO:0005737,GO:0042545,GO:0046910,GO:0005618,GO:0009620,GO:0005829,GO:0005886,GO:0009624,GO:0030599,GO:0048046,GO:0045330,GO:0050829,GO:0045490
rubrum	female-biased	OG0010221	AT2G41480	ID=AT2G41480;Name=AT2G41480;Note=peroxidase superfamily protein;curator_summary=Encodes a cationic cell-wall-bound peroxidase homolog that is involved in the lignification of cell walls.;Alias=AtPRX25,PRX25,peroxidase 25;computational_description=Peroxidase superfamily protein%3B FUNCTIONS IN: peroxidase activity%2C heme binding%3B INVOLVED IN: oxidation reduction%2C response to oxidative stress%…	GO:0009664,GO:0009808,GO:0020037,GO:0006979,GO:0098869,GO:0006950,GO:0042744,GO:0055114,GO:0009505,GO:0046872,GO:0004601,GO:0009506,GO:0005576
rubrum	female-biased	OG0010535	AT3G53400	ID=AT3G53400;Name=AT3G53400;Note=peptide upstream protein;computational_description=BEST Arabidopsis thaliana protein match is: conserved peptide upstream open reading frame 47 (TAIR:AT5G03190.1)%3B Has 285 Blast hits to 285 proteins in 23 species: Archae - 0%3B Bacteria - 0%3B Metazoa - 1%3B Fungi - 0%3B Plants - 279%3B Viruses - 0%3B Other Eukaryotes - 5 (source: NCBI BLink).;Dbxref=PMID:129490…	GO:0008168,GO:0016021,GO:0005576
rubrum	female-biased	OG0011267	AT4G08950	ID=AT4G08950;Name=AT4G08950;Note=Phosphate-responsive 1 family protein;symbol=EXO;full_name=EXORDIUM;computational_description=EXORDIUM (EXO)%3B FUNCTIONS IN: molecular_function unknown%3B INVOLVED IN: response to brassinosteroid stimulus%3B LOCATED IN: cell wall%2C plant-type cell wall%3B EXPRESSED IN: 21 plant structures%3B EXPRESSED DURING: 13 growth stages%3B CONTAINS InterPro DOMAIN/s: Phosp…	GO:0005794,GO:0005615,GO:0009741,GO:0005618,GO:0048046,GO:0005576,GO:0003674,GO:0009505
rubrum	female-biased	OG0011645	AT4G11650	ID=AT4G11650;Name=AT4G11650;Note=osmotin 34;curator_summary=osmotin-like protein;symbol=OSM34;Alias=ATOSM34,osmotin 34;full_name=osmotin 34;computational_description=osmotin 34 (OSM34)%3B INVOLVED IN: defense response to fungus%2C incompatible interaction%2C response to salt stress%2C defense response to bacterium%2C incompatible interaction%2C response to other organism%3B LOCATED IN: endomembra…	GO:0009816,GO:0009817,GO:0005576,GO:0006952,GO:0099503
rubrum	female-biased	OG0012323	AT2G39700	ID=AT2G39700;Name=AT2G39700;Note=expansin A4;curator_summary=putative expansin. Naming convention from the Expansin Working Group (Kende et al%2C 2004. Plant Mol Bio). Involved in the formation of nematode-induced syncytia in roots of Arabidopsis thaliana.;symbol=EXPA4;Alias=ATEXP4,ATEXPA4,expansin A4,ATHEXP ALPHA 1.6;full_name=expansin A4;computational_description=expansin A4 (EXPA4)%3B CONTAINS…	GO:0009664,GO:0009826,GO:0005829,GO:0016020,GO:0009828,GO:0005576,GO:0006949,GO:0009505,GO:0009506
rubrum	female-biased	OG0012345	AT5G08180	ID=AT5G08180;Name=AT5G08180;Note=Ribosomal protein L7Ae/L30e/S12e/Gadd45 family protein;computational_description=Ribosomal protein L7Ae/L30e/S12e/Gadd45 family protein%3B FUNCTIONS IN: RNA binding%3B LOCATED IN: nucleolus%3B EXPRESSED IN: 22 plant structures%3B EXPRESSED DURING: 13 growth stages%3B CONTAINS InterPro DOMAIN/s: H/ACA ribonucleoprotein complex%2C subunit Nhp2%2C eukaryote (InterPro…	GO:0031429,GO:0005730,GO:0031118,GO:0005634,GO:0031120,GO:0003723,GO:0000470,GO:0034513,GO:0000469
rubrum	female-biased	OG0012483	AT3G02040	ID=AT3G02040;Name=AT3G02040;Note=senescence-related gene 3;curator_summary=Encodes a member of the glycerophosphodiester phosphodiesterase (GDPD) family. Has glycerophosphodiester phosphodiesterase activity. Functions in maintaining cellular phosphate homeostasis under phosphate starvation.;symbol=SRG3;Alias=AtGDPD1,GDPD1,Glycerophosphodiester phosphodiesterase 1;full_name=senescence-related gene…	GO:0005737,GO:0009536,GO:0008889,GO:0000287,GO:0005623,GO:0006071,GO:0071456,GO:0046475,GO:0030643,GO:0009507
rubrum	female-biased	OG0012807	AT2G41905	ID=AT2G41905;Name=AT2G41905;Note=transmembrane protein;computational_description=BEST Arabidopsis thaliana protein match is: arabinogalactan protein 23 (TAIR:AT3G57690.1)%3B Has 35333 Blast hits to 34131 proteins in 2444 species: Archae - 798%3B Bacteria - 22429%3B Metazoa - 974%3B Fungi - 991%3B Plants - 531%3B Viruses - 0%3B Other Eukaryotes - 9610 (source: NCBI BLink).;Dbxref=PMID:11152613,loc…	GO:0008150,GO:0016021,GO:0003674,GO:0005886
rubrum	female-biased	OG0012977	AT5G63180	ID=AT5G63180;Name=AT5G63180;Note=Pectin lyase-like superfamily protein;computational_description=Pectin lyase-like superfamily protein%3B CONTAINS InterPro DOMAIN/s: Pectin lyase fold/virulence factor (InterPro:IPR011050)%2C AmbAllergen (InterPro:IPR018082)%2C Pectate lyase/Amb allergen (InterPro:IPR002022)%2C Pectin lyase fold (InterPro:IPR012334)%2C Parallel beta-helix repeat (InterPro:IPR00662…	GO:0009536,GO:0030570,GO:0016829,GO:0005576,GO:0045490,GO:0046872
rubrum	female-biased	OG0013278
rubrum	female-biased	OG0014758	AT1G35140	ID=AT1G35140;Name=AT1G35140;Note=Phosphate-responsive 1 family protein;curator_summary=EXL1 is involved in the C-starvation response. Phenotypic changes of an exl1 loss of function mutant became evident only under corresponding experimental conditions. For example%2C the mutant showed diminished biomass production in a short-day/low light growth regime%2C impaired survival during extended night%2…	GO:0005794,GO:0005615,GO:0048046,GO:0005576,GO:0003674,GO:0071456,GO:0001666,GO:0009505
rubrum	female-biased	OG0014781
rubrum	female-biased	OG0015724
rubrum	female-biased	OG0024914	AT1G21310	ID=AT1G21310;Name=AT1G21310;Note=extensin 3;curator_summary=Encodes extensin 3.;symbol=EXT3;Alias=ATEXT3,extensin 3,RSH,ROOT-SHOOT-HYPOCOTYL DEFECTIVE;full_name=extensin 3;computational_description=extensin 3 (EXT3)%3B FUNCTIONS IN: structural constituent of cell wall%3B INVOLVED IN: plant-type cell wall organization%3B LOCATED IN: endomembrane system%3B EXPRESSED IN: 7 plant structures%3B EXPRES…	GO:0009664,GO:0005576,GO:0009530,GO:0005199
rubrum	female-biased	OG0025090	AT1G69120	ID=AT1G69120;Name=AT1G69120;Note=K-box region and MADS-box transcription factor family protein;curator_summary=Floral homeotic gene encoding a MADS domain protein homologous to SRF transcription factors. Specifies floral meristem and sepal identity. Required for the transcriptional activation of AGAMOUS. Interacts with LEAFY.Binds to promoter and regulates the expression of flowering time genes S…	GO:0010582,GO:0044212,GO:0010076,GO:0043565,GO:0003700,GO:0008134,GO:0030154,GO:0007275,GO:0009933,GO:0045944,GO:0045893,GO:0005515,GO:0003677,GO:0000976,GO:0046982,GO:0009908,GO:0005634,GO:0000981,GO:0000977
spissifolium	male-biased	OG0000329	AT1G17840	ID=AT1G17840;Name=AT1G17840;Note=white-brown complex-like protein;curator_summary=Encodes a plasma membrane-localized ATP-binding cassette transporter%2C that is required for cutin transport to the extracellular matrix.;symbol=ABCG11;Alias=ATWBC11,ARABIDOPSIS THALIANA WHITE-BROWN COMPLEX HOMOLOG PROTEIN 11,AtABCG11,COF1,CUTICULAR DEFECT AND ORGAN FUSION 1,DSO,DESPERADO,WBC11,white-brown complex h…	GO:0009897,GO:0042626,GO:0016021,GO:0009737,GO:0016887,GO:0015908,GO:0010588,GO:0015245,GO:0009611,GO:0055085,GO:0080051,GO:0005515,GO:0005886,GO:0009651,GO:0005634,GO:0010222,GO:0005524,GO:0042803
spissifolium	male-biased	OG0000374	AT3G61490	ID=AT3G61490;Name=AT3G61490;Note=Pectin lyase-like superfamily protein;computational_description=Pectin lyase-like superfamily protein%3B FUNCTIONS IN: polygalacturonase activity%3B INVOLVED IN: carbohydrate metabolic process%3B LOCATED IN: endomembrane system%3B EXPRESSED IN: 22 plant structures%3B EXPRESSED DURING: 14 growth stages%3B CONTAINS InterPro DOMAIN/s: Pectin lyase fold/virulence fact…	GO:0005975,GO:0016829,GO:0004650,GO:0071555,GO:0005576,GO:0009507
spissifolium	male-biased	OG0000468	AT1G02460	ID=AT1G02460;Name=AT1G02460;Note=Pectin lyase-like superfamily protein;computational_description=Pectin lyase-like superfamily protein%3B FUNCTIONS IN: polygalacturonase activity%3B INVOLVED IN: carbohydrate metabolic process%3B EXPRESSED IN: stem%2C root%2C stamen%2C seed%3B EXPRESSED DURING: 4 anthesis%2C E expanded cotyledon stage%3B CONTAINS InterPro DOMAIN/s: Pectin lyase fold/virulence fact…	GO:0071555,GO:0016829,GO:0005576,GO:0005975,GO:0004650
spissifolium	male-biased	OG0000541
spissifolium	male-biased	OG0000569	AT1G62660	ID=AT1G62660;Name=AT1G62660;Note=Glycosyl hydrolases family 32 protein;computational_description=Glycosyl hydrolases family 32 protein%3B FUNCTIONS IN: hydrolase activity%2C hydrolyzing O-glycosyl compounds%3B INVOLVED IN: sucrose catabolic process%2C using beta-fructofuranosidase%2C carbohydrate metabolic process%3B LOCATED IN: vacuole%3B EXPRESSED IN: 23 plant structures%3B EXPRESSED DURING: 12…	GO:0071370,GO:0016020,GO:0000325,GO:0009617,GO:0009737,GO:0005773,GO:0016021,GO:0009738,GO:0005985,GO:0005775,GO:0009414,GO:0004575,GO:0009651,GO:0005634
spissifolium	male-biased	OG0001123	AT1G08250	ID=AT1G08250;Name=AT1G08250;Note=arogenate dehydratase 6;curator_summary=Encodes a plastid-localized arogenate dehydratase involved in phenylalanine biosynthesis. Although this enzyme has sequence similarity to prephenate dehydratases%2C it is 98 times more active with arogenate than prephenate in enzymatic assays.;symbol=ADT6;Alias=AtADT6,Arabidopsis thaliana arogenate dehydratase 6;full_name=ar…	GO:0005737,GO:0009570,GO:0004664,GO:0009094,GO:0047769,GO:0009507
spissifolium	male-biased	OG0001200
spissifolium	male-biased	OG0001217	AT1G73620	ID=AT1G73620;Name=AT1G73620;Note=Pathogenesis-related thaumatin superfamily protein;computational_description=Pathogenesis-related thaumatin superfamily protein%3B INVOLVED IN: response to other organism%3B LOCATED IN: membrane%3B EXPRESSED IN: 17 plant structures%3B EXPRESSED DURING: 9 growth stages%3B CONTAINS InterPro DOMAIN/s: Thaumatin%2C conserved site (InterPro:IPR017949)%2C Thaumatin%2C p…	GO:0006952,GO:0005576,GO:0009506
spissifolium	male-biased	OG0001220	AT5G42800	ID=AT5G42800;Name=AT5G42800;Note=dihydroflavonol 4-reductase;curator_summary=dihydroflavonol reductase. Catalyzes the conversion of dihydroquercetin to leucocyanidin in the biosynthesis of anthocyanins. Not expressed in roots (qRT-PCR).;symbol=DFR;Alias=M318,TT3;full_name=dihydroflavonol 4-reductase;computational_description=dihydroflavonol 4-reductase (DFR)%3B CONTAINS InterPro DOMAIN/s: NAD-dep…	GO:0009718,GO:0042406,GO:0016616,GO:0050662,GO:0047890,GO:0045552,GO:0005515,GO:0055114,GO:0016491
spissifolium	male-biased	OG0001400	AT1G20010	ID=AT1G20010;Name=AT1G20010;Note=tubulin beta-5 chain;curator_summary=beta tubulin;symbol=TUB5;full_name=tubulin beta-5 chain;computational_description=tubulin beta-5 chain (TUB5)%3B FUNCTIONS IN: structural constituent of cytoskeleton%3B INVOLVED IN: microtubule-based process%3B LOCATED IN: tubulin complex%2C cell wall%2C plasma membrane%2C chloroplast%2C membrane%3B EXPRESSED IN: 24 plant struc…	GO:0005737,GO:0045298,GO:0005200,GO:0000278,GO:0005618,GO:0009570,GO:0005829,GO:0003924,GO:0005774,GO:0007017,GO:0000226,GO:0005515,GO:0005886,GO:0005874,GO:0005634,GO:0005525
spissifolium	male-biased	OG0001441	AT3G45970	ID=AT3G45970;Name=AT3G45970;Note=expansin-like A1;curator_summary=member of EXPANSIN-LIKE. Naming convention from the Expansin Working Group (Kende et al%2C 2004. Plant Mol Bio);symbol=EXLA1;Alias=ATEXLA1,expansin-like A1,ATEXPL1,ATHEXP BETA 2.1,EXPL1,EXPANSIN L1;full_name=expansin-like A1;computational_description=expansin-like A1 (EXLA1)%3B INVOLVED IN: unidimensional cell growth%2C plant-type …	GO:0009826,GO:0099503,GO:0005794,GO:0005618,GO:0016021,GO:0009828,GO:0005576,GO:0009505,GO:0009506
spissifolium	male-biased	OG0001934	AT5G18930	ID=AT5G18930;Name=AT5G18930;Note=Adenosylmethionine decarboxylase family protein;symbol=BUD2;Alias=SAMDC4;full_name=BUSHY AND DWARF 2;computational_description=BUSHY AND DWARF 2 (BUD2)%3B FUNCTIONS IN: adenosylmethionine decarboxylase activity%3B INVOLVED IN: spermidine biosynthetic process%2C spermine biosynthetic process%2C polyamine biosynthetic process%3B LOCATED IN: cellular_component unknow…	GO:0006557,GO:0005634,GO:0006597,GO:0099402,GO:0004014,GO:0005829,GO:0008295
spissifolium	male-biased	OG0002925	AT2G46410	ID=AT2G46410;Name=AT2G46410;Note=Homeodomain-like superfamily protein;curator_summary=Nuclear-localized R3-type MYB transcription factor. Positive regulator of hair-cell differentiation. Preferentially transcribed in hairless cells. Moves from atrichoblasts into trichoblast via plasmodesmata in a tissue-specific mode. N-terminus and part of the Myb domain are required for this movement%2C with W7…	GO:0044212,GO:0010063,GO:0010376,GO:0009751,GO:0009753,GO:0043565,GO:0003700,GO:0005634,GO:0030154,GO:0009913,GO:0005515
spissifolium	male-biased	OG0002948	AT3G22810	ID=AT3G22810;Name=AT3G22810;Note=auxin canalization protein (DUF828);computational_description=FUNCTIONS IN: phosphoinositide binding%3B INVOLVED IN: signal transduction%3B LOCATED IN: cellular_component unknown%3B EXPRESSED IN: 10 plant structures%3B EXPRESSED DURING: 4 anthesis%2C F mature embryo stage%2C petal differentiation and expansion stage%2C E expanded cotyledon stage%2C D bilateral sta…	GO:0009734,GO:0010087,GO:0010305,GO:0005634,GO:0005802,GO:0035091,GO:0007165,GO:0009507
spissifolium	male-biased	OG0003206	AT1G60590	ID=AT1G60590;Name=AT1G60590;Note=Pectin lyase-like superfamily protein;computational_description=Pectin lyase-like superfamily protein%3B FUNCTIONS IN: polygalacturonase activity%3B INVOLVED IN: carbohydrate metabolic process%3B EXPRESSED IN: 20 plant structures%3B EXPRESSED DURING: 10 growth stages%3B CONTAINS InterPro DOMAIN/s: Pectin lyase fold/virulence factor (InterPro:IPR011050)%2C Pectin l…	GO:0071555,GO:0016829,GO:0005576,GO:0005975,GO:0004650
spissifolium	male-biased	OG0003581	AT5G67260	ID=AT5G67260;Name=AT5G67260;Note=CYCLIN D3%3B2;curator_summary=Encode CYCD3%3B2%2C a CYCD3 D-type cyclin. Important for determining cell number in developing lateral organs. Mediating cytokinin effects in apical growth and development.;symbol=CYCD3%3B2;full_name=CYCLIN D3%3B2;computational_description=CYCLIN D3%3B2 (CYCD3%3B2)%3B FUNCTIONS IN: cyclin-dependent protein kinase activity%3B INVOLVED …	GO:0042127,GO:0005737,GO:0048316,GO:0000079,GO:0010444,GO:0019901,GO:0016538,GO:0044772,GO:0005515,GO:0004672,GO:0000307,GO:1901371,GO:0005634,GO:0051301
spissifolium	male-biased	OG0003605	AT1G17840	ID=AT1G17840;Name=AT1G17840;Note=white-brown complex-like protein;curator_summary=Encodes a plasma membrane-localized ATP-binding cassette transporter%2C that is required for cutin transport to the extracellular matrix.;symbol=ABCG11;Alias=ATWBC11,ARABIDOPSIS THALIANA WHITE-BROWN COMPLEX HOMOLOG PROTEIN 11,AtABCG11,COF1,CUTICULAR DEFECT AND ORGAN FUSION 1,DSO,DESPERADO,WBC11,white-brown complex h…	GO:0009897,GO:0042626,GO:0016021,GO:0009737,GO:0016887,GO:0015908,GO:0010588,GO:0015245,GO:0009611,GO:0055085,GO:0080051,GO:0005515,GO:0005886,GO:0009651,GO:0005634,GO:0010222,GO:0005524,GO:0042803
spissifolium	male-biased	OG0003944	AT2G44830	ID=AT2G44830;Name=AT2G44830;Note=Protein kinase superfamily protein;computational_description=Protein kinase superfamily protein%3B FUNCTIONS IN: kinase activity%3B INVOLVED IN: protein amino acid phosphorylation%3B LOCATED IN: plasma membrane%2C nucleus%3B EXPRESSED IN: 19 plant structures%3B EXPRESSED DURING: 11 growth stages%3B CONTAINS InterPro DOMAIN/s: Protein kinase%2C catalytic domain (In…	GO:0005737,GO:0009638,GO:0010315,GO:0005634,GO:0016301,GO:0048756,GO:0006468,GO:0004674,GO:0005886
spissifolium	male-biased	OG0004139	AT5G06390	ID=AT5G06390;Name=AT5G06390;Note=FASCICLIN-like arabinogalactan protein 17 precursor;symbol=FLA17;full_name=FASCICLIN-like arabinogalactan protein 17 precursor;computational_description=FASCICLIN-like arabinogalactan protein 17 precursor (FLA17)%3B FUNCTIONS IN: molecular_function unknown%3B INVOLVED IN: cell adhesion%3B LOCATED IN: vacuole%3B EXPRESSED IN: guard cell%3B CONTAINS InterPro DOMAIN/…	GO:0005773,GO:0005576,GO:0003674
spissifolium	male-biased	OG0004450	AT1G61720	ID=AT1G61720;Name=AT1G61720;Note=NAD(P)-binding Rossmann-fold superfamily protein;curator_summary=Negative regulator of flavonoid biosynthesis%2C mutants accumulate flavonoid pigments in their seed coat%2C putative oxidoreductase. It is thought that a ternary complex composed of TT2%2C TT8 and TTG1 is necessary for correct expression of BAN in seed endothelium.;symbol=BAN;full_name=BANYULS;comput…	GO:0050662,GO:0016616,GO:0009964,GO:0033729,GO:0009813,GO:0009507,GO:0055114,GO:0016491
spissifolium	male-biased	OG0004467	AT3G08030	ID=AT3G08030;Name=AT3G08030;Note=DNA-directed RNA polymerase subunit beta (Protein of unknown function%2C DUF642);curator_summary=The mRNA of this gene is expressed in viable seeds. Its detection in a dry seed lot has potential for use as a molecular marker for germination performance as absence of expression correlates with decreased germination.;computational_description=Protein of unknown func…	GO:0099503,GO:0005618,GO:0005643,GO:0003674,GO:0005886,GO:0008150,GO:0009507
spissifolium	male-biased	OG0004792
spissifolium	male-biased	OG0004837	AT4G21960	ID=AT4G21960;Name=AT4G21960;Note=Peroxidase superfamily protein;curator_summary=Encodes AT4g21960 (AT4g21960/T8O5_170).;symbol=PRXR1;computational_description=PRXR1%3B FUNCTIONS IN: peroxidase activity%2C heme binding%3B INVOLVED IN: response to oxidative stress%2C oxidation reduction%3B LOCATED IN: endomembrane system%3B EXPRESSED IN: 24 plant structures%3B EXPRESSED DURING: 13 growth stages%3B …	GO:0020037,GO:0009505,GO:0048511,GO:0006950,GO:0042744,GO:0009506,GO:0006979,GO:0046872,GO:0004601,GO:0055114,GO:0005576
spissifolium	male-biased	OG0004910	AT5G46330	ID=AT5G46330;Name=AT5G46330;Note=Leucine-rich receptor-like protein kinase family protein;curator_summary=Encodes a leucine-rich repeat serine/threonine protein kinase that is expressed ubiquitously. FLS2 is involved in MAP kinase signalling relay involved in innate immunity. Essential in the perception of flagellin%2C a potent elicitor of the defense response. FLS2 is directed for degradation by…	GO:0006468,GO:0016020,GO:0052544,GO:0010359,GO:0006898,GO:0016045,GO:0016021,GO:0016301,GO:0005524,GO:0004675,GO:0042742,GO:0005515,GO:0005886,GO:0005768,GO:0042802,GO:0010008
spissifolium	male-biased	OG0004961	AT5G28060	ID=AT5G28060;Name=AT5G28060;Note=Ribosomal protein S24e family protein;computational_description=Ribosomal protein S24e family protein%3B FUNCTIONS IN: structural constituent of ribosome%2C nucleotide binding%3B INVOLVED IN: translation%2C ribosome biogenesis%3B LOCATED IN: cytosolic small ribosomal subunit%2C cytosolic ribosome%2C ribosome%2C cell wall%2C membrane%3B EXPRESSED IN: 23 plant struc…	GO:0005737,GO:0009536,GO:0022626,GO:0022627,GO:0005618,GO:0006412
spissifolium	male-biased	OG0005368
spissifolium	male-biased	OG0005601	AT5G07990	ID=AT5G07990;Name=AT5G07990;Note=Cytochrome P450 superfamily protein;curator_summary=Required for flavonoid 3' hydroxylase activity. Enzyme abundance relative to CHS determines Quercetin/Kaempferol metabolite ratio.;symbol=TT7;Alias=CYP75B1,CYTOCHROME P450 75B1,D501;full_name=TRANSPARENT TESTA 7;computational_description=TRANSPARENT TESTA 7 (TT7)%3B CONTAINS InterPro DOMAIN/s: Cytochrome P450 (In…	GO:0009733,GO:0020037,GO:0016709,GO:0016021,GO:0016020,GO:0016711,GO:0009813,GO:0005789,GO:0009411,GO:0005506,GO:0055114,GO:0005576
spissifolium	male-biased	OG0005723	AT1G29980	ID=AT1G29980;Name=AT1G29980;Note=choice-of-anchor C domain protein%2C putative (Protein of unknown function%2C DUF642);computational_description=INVOLVED IN: biological_process unknown%3B LOCATED IN: plasma membrane%2C anchored to membrane%3B EXPRESSED IN: 24 plant structures%3B EXPRESSED DURING: 13 growth stages%3B CONTAINS InterPro DOMAIN/s: Protein of unknown function DUF642 (InterPro:IPR00694…	GO:0005634,GO:0005576,GO:0008150,GO:0005886,GO:0031225
spissifolium	male-biased	OG0006219	AT3G51670	ID=AT3G51670;Name=AT3G51670;Note=SEC14 cytosolic factor family protein / phosphoglyceride transfer family protein;computational_description=SEC14 cytosolic factor family protein / phosphoglyceride transfer family protein%3B FUNCTIONS IN: transporter activity%3B INVOLVED IN: transport%3B LOCATED IN: plasma membrane%3B EXPRESSED IN: 23 plant structures%3B EXPRESSED DURING: 13 growth stages%3B CONTA…	GO:0005737,GO:0071365,GO:1901703,GO:0008289,GO:0007049,GO:0005886,GO:0051301
spissifolium	male-biased	OG0006863	AT2G28100	ID=AT2G28100;Name=AT2G28100;Note=alpha-L-fucosidase 1;curator_summary=Encodes a protein with %26#945%3B-fucosidase activity. The activity was assessed on 2'-fucosyl-lactitol. AtFUC1 was not able to act on XXFG substrates%2C at least when heterologously expressed in %3Ci%3EPichia pastoris%3C/i%3E. The enzyme has been postulated to act on fucosylated substrates other than xyloglucan oligosaccharide…	GO:0048046,GO:0099503,GO:0005773,GO:0016139,GO:0005764,GO:0004560,GO:0005576,GO:0006516,GO:0006004
spissifolium	male-biased	OG0006867	AT2G37870	ID=AT2G37870;Name=AT2G37870;Note=Bifunctional inhibitor/lipid-transfer protein/seed storage 2S albumin superfamily protein;computational_description=Bifunctional inhibitor/lipid-transfer protein/seed storage 2S albumin superfamily protein%3B FUNCTIONS IN: lipid binding%3B INVOLVED IN: lipid transport%3B LOCATED IN: endomembrane system%3B EXPRESSED IN: 11 plant structures%3B EXPRESSED DURING: LP.0…	GO:0005504,GO:0005576,GO:0009627,GO:0009506,GO:0006869
spissifolium	male-biased	OG0007669	AT2G36570	ID=AT2G36570;Name=AT2G36570;Note=Leucine-rich repeat protein kinase family protein;Alias=PXC1,PXY/TDR-correlated 1;computational_description=Leucine-rich repeat protein kinase family protein%3B FUNCTIONS IN: protein serine/threonine kinase activity%2C kinase activity%2C ATP binding%3B INVOLVED IN: transmembrane receptor protein tyrosine kinase signaling pathway%2C protein amino acid phosphorylati…	GO:0006468,GO:0009834,GO:0016021,GO:0016301,GO:0005886,GO:0004672,GO:0005524
spissifolium	male-biased	OG0007719	AT1G54730	ID=AT1G54730;Name=AT1G54730;Note=Major facilitator superfamily protein;computational_description=Major facilitator superfamily protein%3B FUNCTIONS IN: carbohydrate transmembrane transporter activity%2C sugar:hydrogen symporter activity%3B INVOLVED IN: transport%2C transmembrane transport%3B LOCATED IN: integral to membrane%2C membrane%3B EXPRESSED IN: 22 plant structures%3B EXPRESSED DURING: 13 …	GO:0005351,GO:0005739,GO:0046323,GO:0005887,GO:0005886,GO:0015144,GO:0009507
spissifolium	male-biased	OG0008087	AT3G20015	ID=AT3G20015;Name=AT3G20015;Note=Eukaryotic aspartyl protease family protein;computational_description=Eukaryotic aspartyl protease family protein%3B FUNCTIONS IN: aspartic-type endopeptidase activity%3B INVOLVED IN: proteolysis%3B LOCATED IN: endomembrane system%3B EXPRESSED IN: 20 plant structures%3B EXPRESSED DURING: 12 growth stages%3B CONTAINS InterPro DOMAIN/s: Peptidase aspartic (InterPro:…	GO:0006508,GO:0005576,GO:0004190,GO:0030163,GO:0003677
spissifolium	male-biased	OG0008188
spissifolium	male-biased	OG0008723	AT1G11580	ID=AT1G11580;Name=AT1G11580;Note=methylesterase PCR A;symbol=PMEPCRA;Alias=ATPMEPCRA;full_name=methylesterase PCR A;computational_description=methylesterase PCR A (PMEPCRA)%3B FUNCTIONS IN: enzyme inhibitor activity%2C pectinesterase activity%3B INVOLVED IN: cell wall modification%3B LOCATED IN: cell wall%2C plasma membrane%2C plant-type cell wall%3B EXPRESSED IN: 25 plant structures%3B EXPRESSED…	GO:0042545,GO:0046910,GO:0016020,GO:0005618,GO:0005829,GO:0009617,GO:0031640,GO:0030599,GO:0005774,GO:0050832,GO:0005576,GO:0090729,GO:0017148,GO:0045490,GO:0030598,GO:0045330
spissifolium	male-biased	OG0008762	AT3G19820	ID=AT3G19820;Name=AT3G19820;Note=cell elongation protein / DWARF1 / DIMINUTO (DIM);curator_summary=Involved in the conversion of the early brassinosteroid precursor 24-methylenecholesterol to campesterol. Brassinosteroids affect cellular elongation. Mutants have dwarf phenotype. DWF1 is a Ca2+-dependent calmodulin-binding protein.;symbol=DWF1;Alias=CBB1,CABBAGE 1,DIM1,DIMINUTO 1,DIM,DIMINUTIA,EVE…	GO:0005783,GO:0016132,GO:0009416,GO:0071949,GO:0005737,GO:0009826,GO:0016628,GO:0005773,GO:0016021,GO:0016020,GO:0005774,GO:0055114,GO:0006694,GO:0003824,GO:0005886,GO:0008202,GO:0009808,GO:0050614,GO:0009834,GO:0005829,GO:0005516,GO:0005634
spissifolium	male-biased	OG0009383	AT1G75750	ID=AT1G75750;Name=AT1G75750;Note=GAST1 protein homolog 1;curator_summary=GA-responsive GAST1 protein homolog regulated by BR and GA antagonistically. Possibly involved in cell elongation based on expression data;symbol=GASA1;full_name=GAST1 protein homolog 1;computational_description=GAST1 protein homolog 1 (GASA1)%3B CONTAINS InterPro DOMAIN/s: Gibberellin regulated protein (InterPro:IPR003854)%…	GO:0009826,GO:0009737,GO:0009740,GO:0009741,GO:0005618,GO:0009739,GO:0005739,GO:0005576,GO:0009505
spissifolium	male-biased	OG0009476	AT3G14240	ID=AT3G14240;Name=AT3G14240;Note=Subtilase family protein;computational_description=Subtilase family protein%3B FUNCTIONS IN: identical protein binding%2C serine-type endopeptidase activity%3B INVOLVED IN: proteolysis%2C negative regulation of catalytic activity%3B LOCATED IN: endomembrane system%3B EXPRESSED IN: 22 plant structures%3B EXPRESSED DURING: 13 growth stages%3B CONTAINS InterPro DOMAI…	GO:0016485,GO:0004252,GO:0016020,GO:0005886,GO:0005576
spissifolium	male-biased	OG0009646	AT3G59030	ID=AT3G59030;Name=AT3G59030;Note=MATE efflux family protein;curator_summary=Encodes a proton antiporter. Involved in the transportation of proanthocyanidin precursors into the vacuole. In vitro transport experiments showed that cyanidin-3-O-glucoside (anthocyanin) was an effective substrate%2C whereas the proanthocyanidin precursor epicatechin was not transported. However catechin-3-O-glucoside i…	GO:0016021,GO:0016020,GO:0015299,GO:0009813,GO:0009705,GO:0022857,GO:0042910,GO:0010231,GO:0005774,GO:0010023,GO:0009507
spissifolium	male-biased	OG0009717	AT5G02640	ID=AT5G02640;Name=AT5G02640;Note=hypothetical protein;computational_description=unknown protein%3B BEST Arabidopsis thaliana protein match is: unknown protein (TAIR:AT3G46300.1)%3B Has 37 Blast hits to 37 proteins in 10 species: Archae - 0%3B Bacteria - 0%3B Metazoa - 0%3B Fungi - 0%3B Plants - 37%3B Viruses - 0%3B Other Eukaryotes - 0 (source: NCBI BLink).;Dbxref=locus:2181798;locus_type=protein…	GO:0003674,GO:0005634,GO:0008150
spissifolium	male-biased	OG0009768	AT5G35550	ID=AT5G35550;Name=AT5G35550;Note=Duplicated homeodomain-like superfamily protein;curator_summary=TT2 encodes a R2R3 MYB domain putative transcription factor that acts as a key determinant in the proanthocyanidin accumulation of developing seed. It is thought that a ternary complex composed of TT2%2C TT8 and TTG1 is necessary for correct expression of BAN in seed endothelium.;symbol=TT2;Alias=ATMY…	GO:0006633,GO:0043565,GO:0044212,GO:0003700,GO:0005634,GO:0030154,GO:0009813,GO:0006970,GO:0005524,GO:0005515,GO:0010023
spissifolium	male-biased	OG0009936	AT4G22880	ID=AT4G22880;Name=AT4G22880;Note=leucoanthocyanidin dioxygenase;curator_summary=encodes leucoanthocyanidin dioxygenase%2C which is involved in proanthocyanin biosynthesis. Mutant analysis suggests that this gene is also involved in vacuole formation.;symbol=LDOX;Alias=ANS,ANTHOCYANIDIN SYNTHASE,TDS4,TANNIN DEFICIENT SEED 4,TT18;full_name=leucoanthocyanidin dioxygenase;computational_description=le…	GO:0005737,GO:0009718,GO:0009753,GO:0051213,GO:0031418,GO:0050589,GO:0009611,GO:0055114,GO:0046872,GO:0010023,GO:0007033
spissifolium	male-biased	OG0010174	AT3G54260	ID=AT3G54260;Name=AT3G54260;Note=TRICHOME BIREFRINGENCE-LIKE 36;curator_summary=Encodes a member of the TBL (TRICHOME BIREFRINGENCE-LIKE) gene family containing a plant-specific DUF231 (domain of unknown function) domain. TBL gene family has 46 members%2C two of which (TBR/AT5G06700 and TBL3/AT5G01360) have been shown to be involved in the synthesis and deposition of secondary wall cellulose%2C p…	GO:0005794,GO:0016021,GO:0016413
spissifolium	male-biased	OG0010193	AT5G49330	ID=AT5G49330;Name=AT5G49330;Note=myb domain protein 111;curator_summary=Member of the R2R3 factor gene family.;symbol=MYB111;Alias=ATMYB111,ARABIDOPSIS MYB DOMAIN PROTEIN 111,PFG3,PRODUCTION OF FLAVONOL GLYCOSIDES 3;full_name=myb domain protein 111;computational_description=myb domain protein 111 (MYB111)%3B CONTAINS InterPro DOMAIN/s: SANT%2C DNA-binding (InterPro:IPR001005)%2C Homeodomain-like …	GO:0043565,GO:0051555,GO:1900386,GO:0044212,GO:0003700,GO:0005634,GO:0030154,GO:0009416,GO:0010224
spissifolium	male-biased	OG0010839	AT5G26220	ID=AT5G26220;Name=AT5G26220;Note=ChaC-like family protein;Alias=AtGGCT2%3B1,GGCT2%3B1,gamma-glutamyl cyclotransferase 2%3B1;computational_description=ChaC-like family protein%3B CONTAINS InterPro DOMAIN/s: ChaC-like protein (InterPro:IPR006840)%3B BEST Arabidopsis thaliana protein match is: ChaC-like family protein (TAIR:AT4G31290.1)%3B Has 1807 Blast hits to 1807 proteins in 277 species: Archae …	GO:0046686,GO:0006751,GO:0010288,GO:0005737,GO:0003839
spissifolium	male-biased	OG0011936	AT1G76490	ID=AT1G76490;Name=AT1G76490;Note=hydroxy methylglutaryl CoA reductase 1;curator_summary=Encodes a 3-hydroxy-3-methylglutaryl coenzyme A reductase%2C which is involved in melavonate biosynthesis and performs the first committed step in isoprenoid biosynthesis. Expression is activated in dark in leaf tissue but not controlled by light in the root (confine;symbol=HMG1;Alias=AtHMGR1,HMGR1,3-HYDROXY-3…	GO:0016126,GO:0050662,GO:0005778,GO:0005783,GO:0015936,GO:0016021,GO:0016020,GO:0042282,GO:0005789,GO:0008299,GO:0005515,GO:0004420,GO:0019287,GO:0055114
spissifolium	male-biased	OG0012170	AT5G05270	ID=AT5G05270;Name=AT5G05270;Note=Chalcone-flavanone isomerase family protein;symbol=CHIL;Alias=AtCHIL;full_name=chalcone isomerase like;computational_description=Chalcone-flavanone isomerase family protein%3B FUNCTIONS IN: intramolecular lyase activity%2C chalcone isomerase activity%3B INVOLVED IN: response to karrikin%3B LOCATED IN: cellular_component unknown%3B EXPRESSED IN: 20 plant structures…	GO:0045430,GO:0009813,GO:0080167,GO:0009507
spissifolium	male-biased	OG0013511	AT1G11390	ID=AT1G11390;Name=AT1G11390;Note=Protein kinase superfamily protein;computational_description=Protein kinase superfamily protein%3B CONTAINS InterPro DOMAIN/s: ABC-1 (InterPro:IPR004147)%2C Protein kinase-like domain (InterPro:IPR011009)%3B BEST Arabidopsis thaliana protein match is: Protein kinase superfamily protein (TAIR:AT1G61640.1)%3B Has 9400 Blast hits to 9333 proteins in 1787 species: Arc…	GO:0005575,GO:0003674,GO:0008150
spissifolium	male-biased	OG0014826	AT1G10540	ID=AT1G10540;Name=AT1G10540;Note=nucleobase-ascorbate transporter 8;symbol=NAT8;Alias=ATNAT8;full_name=nucleobase-ascorbate transporter 8;computational_description=nucleobase-ascorbate transporter 8 (NAT8)%3B FUNCTIONS IN: transmembrane transporter activity%3B INVOLVED IN: transport%2C transmembrane transport%3B LOCATED IN: membrane%3B EXPRESSED IN: 12 plant structures%3B EXPRESSED DURING: 7 grow…	GO:0005215,GO:0005634,GO:0055085,GO:0022857,GO:0005886,GO:0016021,GO:0009506
spissifolium	male-biased	OG0025933	AT1G66180	ID=AT1G66180;Name=AT1G66180;Note=Eukaryotic aspartyl protease family protein;curator_summary=The gene encodes a putative aspartyl protease (ASP). Its expression is induced in response to light and ascorbate.;computational_description=Eukaryotic aspartyl protease family protein%3B FUNCTIONS IN: aspartic-type endopeptidase activity%3B INVOLVED IN: proteolysis%3B LOCATED IN: endomembrane system%3B E…	GO:0005794,GO:0033591,GO:0005576,GO:0009416,GO:0030163,GO:0071456,GO:0004190,GO:0006508
spissifolium	female-biased	OG0000244	AT5G64570	ID=AT5G64570;Name=AT5G64570;Note=beta-D-xylosidase 4;curator_summary=Encodes a beta-d-xylosidase that belongs to family 3 of glycoside hydrolases.;symbol=XYL4;Alias=ATBXL4,ARABIDOPSIS THALIANA BETA-D-XYLOSIDASE 4;full_name=beta-D-xylosidase 4;computational_description=beta-D-xylosidase 4 (XYL4)%3B FUNCTIONS IN: xylan 1%2C4-beta-xylosidase activity%2C hydrolase activity%2C hydrolyzing O-glycosyl c…	GO:0046556,GO:0005618,GO:0016020,GO:0009627,GO:0009505,GO:0048046,GO:0004553,GO:0031222,GO:0045493,GO:0009044,GO:0009507
spissifolium	female-biased	OG0000293	AT3G13750	ID=AT3G13750;Name=AT3G13750;Note=beta galactosidase 1;curator_summary=beta-galactosidase%2C glycosyl hydrolase family 35;symbol=BGAL1;full_name=beta galactosidase 1;computational_description=beta galactosidase 1 (BGAL1)%3B FUNCTIONS IN: beta-galactosidase activity%3B INVOLVED IN: carbohydrate metabolic process%3B LOCATED IN: cell wall%2C plant-type cell wall%3B EXPRESSED IN: 27 plant structures%3…	GO:0005975,GO:0005773,GO:0005829,GO:0030246,GO:0048046,GO:0005618,GO:0005576,GO:0004565,GO:0009505,GO:0009506
spissifolium	female-biased	OG0000313
spissifolium	female-biased	OG0000850	AT2G15480	ID=AT2G15480;Name=AT2G15480;Note=UDP-glucosyl transferase 73B5;symbol=UGT73B5;full_name=UDP-glucosyl transferase 73B5;computational_description=UDP-glucosyl transferase 73B5 (UGT73B5)%3B FUNCTIONS IN: quercetin 3-O-glucosyltransferase activity%2C UDP-glycosyltransferase activity%2C UDP-glucosyltransferase activity%2C transferase activity%2C transferring glycosyl groups%3B INVOLVED IN: response to…	GO:0102425,GO:0043231,GO:0008194,GO:0035251,GO:0047893,GO:0102360,GO:0006952,GO:0080043,GO:0016757,GO:0051707,GO:0009507
spissifolium	female-biased	OG0001273	AT5G41800	ID=AT5G41800;Name=AT5G41800;Note=Transmembrane amino acid transporter family protein;computational_description=Transmembrane amino acid transporter family protein%3B FUNCTIONS IN: amino acid transmembrane transporter activity%3B INVOLVED IN: amino acid transport%3B LOCATED IN: plasma membrane%2C membrane%3B EXPRESSED IN: 10 plant structures%3B EXPRESSED DURING: LP.06 six leaves visible%2C LP.04 f…	GO:0003333,GO:0016021,GO:0015171,GO:0005886
spissifolium	female-biased	OG0001295	AT5G59480	ID=AT5G59480;Name=AT5G59480;Note=Haloacid dehalogenase-like hydrolase (HAD) superfamily protein;computational_description=Haloacid dehalogenase-like hydrolase (HAD) superfamily protein%3B FUNCTIONS IN: hydrolase activity%3B LOCATED IN: cellular_component unknown%3B EXPRESSED IN: 24 plant structures%3B EXPRESSED DURING: 15 growth stages%3B CONTAINS InterPro DOMAIN/s: Pyrimidine 5-nucleotidase (Int…	GO:0016787,GO:0005634
spissifolium	female-biased	OG0001906	AT4G35190	ID=AT4G35190;Name=AT4G35190;Note=Putative lysine decarboxylase family protein;symbol=LOG5;full_name=LONELY GUY 5;computational_description=Putative lysine decarboxylase family protein%3B CONTAINS InterPro DOMAIN/s: Conserved hypothetical protein CHP00730 (InterPro:IPR005269)%3B BEST Arabidopsis thaliana protein match is: lysine decarboxylase family protein (TAIR:AT2G37210.1)%3B Has 30201 Blast hi…	GO:0005829,GO:0005634,GO:0016799,GO:0009691
spissifolium	female-biased	OG0002477	AT4G17090	ID=AT4G17090;Name=AT4G17090;Note=chloroplast beta-amylase;curator_summary=Encodes a beta-amylase targeted to the chloroplast. Transgenic BMY8 RNAi lines fail to accumulate maltose during cold shock suggesting that maltose accumulation coincides with BMY8 expression. Apart from maltose%2C the sugar content of the RNAi lines were similar to wildtype (glucose and sucrose unaffected).;symbol=CT-BMY;A…	GO:0016161,GO:0009570,GO:0005829,GO:0005983,GO:0102229,GO:0005576,GO:0009409,GO:0000024
spissifolium	female-biased	OG0002982
spissifolium	female-biased	OG0003021	ATMG00030	ID=ATMG00030;Note=hypothetical protein;Name=ATMG00030;symbol=ORF107A;computational_description=unknown protein.;Dbxref=locus:504954741;locus_type=protein_coding	GO:0008150,GO:0003674,GO:0005739
spissifolium	female-biased	OG0003186
spissifolium	female-biased	OG0003331	AT2G38090	ID=AT2G38090;Name=AT2G38090;Note=Duplicated homeodomain-like superfamily protein;computational_description=Duplicated homeodomain-like superfamily protein%3B CONTAINS InterPro DOMAIN/s: Molecular chaperone%2C heat shock protein%2C Hsp40%2C DnaJ (InterPro:IPR015609)%2C SANT%2C eukarya (InterPro:IPR017884)%2C Myb-like DNA-binding domain%2C SHAQKYF class (InterPro:IPR006447)%2C SANT%2C DNA-binding (…	GO:0003700,GO:0006355,GO:0005634,GO:0044212
spissifolium	female-biased	OG0003667	ATMG00580	ID=ATMG00580;Note=NADH dehydrogenase subunit 4;Name=ATMG00580;curator_summary=NADH dehydrogenase subunit 4;symbol=NAD4;full_name=NADH dehydrogenase subunit 4;computational_description=NADH dehydrogenase subunit 4 (NAD4)%3B CONTAINS InterPro DOMAIN/s: NADH-quinone oxidoreductase%2C chain M (InterPro:IPR010227)%2C NADH:ubiquinone oxidoreductase%2C chain 4 (InterPro:IPR003918)%2C NADH:ubiquinone/pla…	GO:0045271,GO:0015990,GO:0008137,GO:0016021,GO:0005739,GO:0042773,GO:0005743,GO:0009060,GO:0003954,GO:0005747,GO:0045333,GO:0070469,GO:0048039,GO:0055114
spissifolium	female-biased	OG0003820	AT5G50740	ID=AT5G50740;Name=AT5G50740;Note=Heavy metal transport/detoxification superfamily protein;computational_description=Heavy metal transport/detoxification superfamily protein %3B FUNCTIONS IN: metal ion binding%3B INVOLVED IN: metal ion transport%3B LOCATED IN: cellular_component unknown%3B EXPRESSED IN: 20 plant structures%3B EXPRESSED DURING: 13 growth stages%3B CONTAINS InterPro DOMAIN/s: Heavy …	GO:0005737,GO:0046872,GO:0030001,GO:0005886
spissifolium	female-biased	OG0003969	AT1G02640	ID=AT1G02640;Name=AT1G02640;Note=beta-xylosidase 2;curator_summary=encodes a protein similar to a beta-xylosidase located in the extracellular matrix. This is a member of glycosyl hydrolase family 3 and has six other closely related members.;symbol=BXL2;Alias=ATBXL2,BETA-XYLOSIDASE 2;full_name=beta-xylosidase 2;computational_description=beta-xylosidase 2 (BXL2)%3B FUNCTIONS IN: hydrolase activity…	GO:0046556,GO:0009044,GO:0005576,GO:0004553,GO:0031222,GO:0045493,GO:0009505
spissifolium	female-biased	OG0004149	AT1G17180	ID=AT1G17180;Name=AT1G17180;Note=glutathione S-transferase TAU 25;curator_summary=Encodes glutathione transferase belonging to the tau class of GSTs. Naming convention according to Wagner et al. (2002).;symbol=GSTU25;Alias=ATGSTU25,glutathione S-transferase TAU 25;full_name=glutathione S-transferase TAU 25;computational_description=glutathione S-transferase TAU 25 (GSTU25)%3B CONTAINS InterPro DO…	GO:0005737,GO:0004364,GO:0009407,GO:0005829,GO:0046256,GO:0006749,GO:0009507
spissifolium	female-biased	OG0004851	ATMG00510	ID=ATMG00510;Note=NADH dehydrogenase subunit 7;Name=ATMG00510;curator_summary=NADH dehydrogenase subunit 7;symbol=NAD7;full_name=NADH dehydrogenase subunit 7;computational_description=NADH dehydrogenase subunit 7 (NAD7)%3B FUNCTIONS IN: NADH dehydrogenase activity%3B INVOLVED IN: oxidation reduction%2C cellular respiration%3B LOCATED IN: mitochondrion%2C mitochondrial respiratory chain complex I%…	GO:0009536,GO:0008137,GO:0005739,GO:0045333,GO:0005747,GO:0051287,GO:0070469,GO:0048038,GO:0003954,GO:0055114
spissifolium	female-biased	OG0004934	AT5G02020	ID=AT5G02020;Name=AT5G02020;Note=E3 ubiquitin-protein ligase RLIM-like protein;curator_summary=Encodes a protein involved in salt tolerance%2C names SIS (Salt Induced Serine rich).;symbol=SIS;full_name=Salt Induced Serine rich;computational_description=unknown protein%3B FUNCTIONS IN: molecular_function unknown%3B INVOLVED IN: biological_process unknown%3B LOCATED IN: chloroplast%3B EXPRESSED IN:…	GO:0009651,GO:0005634
spissifolium	female-biased	OG0005187	AT2G47880	ID=AT2G47880;Name=AT2G47880;Note=Glutaredoxin family protein;computational_description=Glutaredoxin family protein%3B FUNCTIONS IN: electron carrier activity%2C arsenate reductase (glutaredoxin) activity%2C protein disulfide oxidoreductase activity%3B INVOLVED IN: cell redox homeostasis%3B LOCATED IN: endomembrane system%3B EXPRESSED IN: 11 plant structures%3B EXPRESSED DURING: 7 growth stages%3B…	GO:0005737,GO:0006995,GO:0005634,GO:0005515,GO:0045454,GO:0015035,GO:0009055
spissifolium	female-biased	OG0005638
spissifolium	female-biased	OG0006715	AT5G40390	ID=AT5G40390;Name=AT5G40390;Note=Raffinose synthase family protein;curator_summary=Encodes a protein which might be involved in the formation of verbascose. A T-DNA insertion mutant was shown to have a decreased amount of verbascose (as well as mannitol) whereas the levels of raffinose and stachyose remained unchanged.;symbol=SIP1;Alias=RS5,raffinose synthase 5;full_name=seed imbibition 1-like;co…	GO:0005737,GO:0047274,GO:0005975,GO:0019593,GO:0005986,GO:0010325,GO:0009414,GO:0009737,GO:0006979,GO:0009507
spissifolium	female-biased	OG0008603	ATMG01190	ID=ATMG01190;Note=ATP synthase subunit 1;Name=ATMG01190;curator_summary=ATPase subunit 1;symbol=ATP1;full_name=ATP synthase subunit 1;computational_description=ATP synthase subunit 1 (ATP1)%3B FUNCTIONS IN: copper ion binding%2C cobalt ion binding%2C zinc ion binding%3B INVOLVED IN: response to oxidative stress%3B LOCATED IN: mitochondrion%2C cell wall%3B EXPRESSED IN: cotyledon%2C guard cell%2C …	GO:0045261,GO:0015986,GO:0043531,GO:0046933,GO:0005618,GO:0050897,GO:0005739,GO:0005743,GO:0005753,GO:0009536,GO:0008270,GO:0016887,GO:0005886,GO:0005507,GO:0006979,GO:0005524,GO:0009507
spissifolium	female-biased	OG0008709	AT2G39200	ID=AT2G39200;Name=AT2G39200;Note=Seven transmembrane MLO family protein;curator_summary=A member of a large family of seven-transmembrane domain proteins specific to plants%2C homologs of the barley mildew resistance locus o (MLO) protein. The Arabidopsis genome contains 15 genes encoding MLO proteins%2C with localization in plasma membrane. Phylogenetic analysis revealed four clades of closely-r…	GO:0010150,GO:0009817,GO:0016021,GO:0006952,GO:0005516,GO:0005886
spissifolium	female-biased	OG0008852	AT4G25000	ID=AT4G25000;Name=AT4G25000;Note=alpha-amylase-like protein;curator_summary=Predicted to be secreted protein based on signalP prediction. Involved in starch mobilization. Mutants are defective in alpha-amylase activity. (Note: AMY1 has been found in the literature to be referred to as AMY3%2C which is not to be confused with AMY3/At1g69830).;symbol=AMY1;Alias=ATAMY1;full_name=alpha-amylase-like;c…	GO:0005975,GO:0009739,GO:0048046,GO:0004556,GO:0005576,GO:0005509,GO:0009737,GO:0103025
spissifolium	female-biased	OG0009309	AT3G03600	ID=AT3G03600;Name=AT3G03600;Note=ribosomal protein S2;curator_summary=Structural component of the mitochondrial ribosome small subunit;symbol=RPS2;full_name=ribosomal protein S2;computational_description=ribosomal protein S2 (RPS2)%3B CONTAINS InterPro DOMAIN/s: Ribosomal protein S2 (InterPro:IPR001865)%2C Ribosomal protein S2%2C conserved site (InterPro:IPR018130)%2C Ribosomal protein S2%2C bact…	GO:0003735,GO:0005763,GO:0006412,GO:0009507
spissifolium	female-biased	OG0009325	ATMG00110	ID=ATMG00110;Note=cytochrome C biogenesis 206;Name=ATMG00110;curator_summary=Encodes a mitochondria-encoded cytochrome c biogenesis protein.;symbol=ABCI2;Alias=CCB206,cytochrome C biogenesis 206;full_name=ATP-binding cassette I2;computational_description=cytochrome C biogenesis 206 (CCB206)%3B FUNCTIONS IN: heme transporter activity%3B INVOLVED IN: cytochrome complex assembly%2C heme transport%3B…	GO:0043190,GO:0015886,GO:0055085,GO:0005739,GO:0015232
spissifolium	female-biased	OG0010101	AT4G38225	ID=AT4G38225;Name=AT4G38225;Note=glycerol kinase;computational_description=unknown protein%3B FUNCTIONS IN: molecular_function unknown%3B INVOLVED IN: biological_process unknown%3B LOCATED IN: chloroplast%3B EXPRESSED IN: 21 plant structures%3B EXPRESSED DURING: 13 growth stages%3B Has 30201 Blast hits to 17322 proteins in 780 species: Archae - 12%3B Bacteria - 1396%3B Metazoa - 17338%3B Fungi - …	GO:0016310,GO:0016301,GO:0009507
spissifolium	female-biased	OG0010103	AT4G39490	ID=AT4G39490;Name=AT4G39490;Note=cytochrome P450%2C family 96%2C subfamily A%2C polypeptide 10;curator_summary=member of CYP96A;symbol=CYP96A10;full_name=cytochrome P450%2C family 96%2C subfamily A%2C polypeptide 10;computational_description=cytochrome P450%2C family 96%2C subfamily A%2C polypeptide 10 (CYP96A10)%3B FUNCTIONS IN: electron carrier activity%2C monooxygenase activity%2C iron ion bin…	GO:0005576
spissifolium	female-biased	OG0010331
spissifolium	female-biased	OG0010353	AT1G21640	ID=AT1G21640;Name=AT1G21640;Note=NAD kinase 2;curator_summary=Encodes a protein with NAD kinase activity. The protein was also shown to bind calmodulin.;symbol=NADK2;Alias=ATNADK2,NAD KINASE 2;full_name=NAD kinase 2;computational_description=NAD kinase 2 (NADK2)%3B FUNCTIONS IN: NAD+ kinase activity%2C calmodulin binding%3B INVOLVED IN: pyridine nucleotide biosynthetic process%2C metabolic proces…	GO:0019674,GO:0016310,GO:0005524,GO:0005516,GO:0003951,GO:0006741,GO:0009507
spissifolium	female-biased	OG0010406	ATMG00513	ID=ATMG00513;Note=NADH dehydrogenase 5A;Name=ATMG00513;curator_summary=Mitochondrial NADH dehydrogenase subunit 5. The gene is trans-spliced from three different pre-cursors%2C NAD5a%2C NAD5b and NAD5c.;symbol=NAD5A;Alias=NAD5.1,NADH DEHYDROGENASE 5.1,NAD5,NADH DEHYDROGENASE SUBUNIT 5;full_name=NADH dehydrogenase 5A;computational_description=NADH dehydrogenase 5A (NAD5A)%3B CONTAINS InterPro DOMA…	GO:0008137,GO:0016021,GO:0005739,GO:0042773,GO:0005743,GO:0045333,GO:0005747,GO:0070469,GO:0003954,GO:0055114
spissifolium	female-biased	OG0010848
spissifolium	female-biased	OG0011035	AT4G18830	ID=AT4G18830;Name=AT4G18830;Note=ovate family protein 5;curator_summary=Member of the ovate protein family.Interacts with BLH1 and KNAT3. Regulates the subcellular localization of BLH1.;symbol=OFP5;Alias=ATOFP5;full_name=ovate family protein 5;computational_description=ovate family protein 5 (OFP5)%3B CONTAINS InterPro DOMAIN/s: Protein of unknown function DUF623 (InterPro:IPR006458)%3B BEST Arab…	GO:0030863,GO:0009553,GO:0005634,GO:0045892,GO:0005730
spissifolium	female-biased	OG0011389	ATMG00990	ID=ATMG00990;Note=NADH dehydrogenase 3;Name=ATMG00990;curator_summary=NADH dehydrogenase subunit 3;symbol=NAD3;full_name=NADH dehydrogenase 3;computational_description=NADH dehydrogenase 3 (NAD3)%3B CONTAINS InterPro DOMAIN/s: NADH:ubiquinone/plastoquinone oxidoreductase%2C chain 3 (InterPro:IPR000440)%3B BEST Arabidopsis thaliana protein match is: NADH:ubiquinone/plastoquinone oxidoreductase%2C …	GO:0008137,GO:0016021,GO:0005739,GO:0031966,GO:0005740,GO:0045333,GO:0005747,GO:0070469,GO:0003954,GO:0055114
spissifolium	female-biased	OG0011873	AT5G62360	ID=AT5G62360;Name=AT5G62360;Note=Plant invertase/pectin methylesterase inhibitor superfamily protein;computational_description=Plant invertase/pectin methylesterase inhibitor superfamily protein%3B FUNCTIONS IN: enzyme inhibitor activity%2C pectinesterase inhibitor activity%2C pectinesterase activity%3B INVOLVED IN: biological_process unknown%3B LOCATED IN: cellular_component unknown%3B EXPRESSED…	GO:0005737,GO:0009827,GO:0004857,GO:0043086,GO:0005886
spissifolium	female-biased	OG0011931
spissifolium	female-biased	OG0012023	AT1G11530	ID=AT1G11530;Name=AT1G11530;Note=C-terminal cysteine residue is changed to a serine 1;curator_summary=Encodes a monocysteinic thioredoxin%2C thioredoxin in which the second cysteine of the redox site is replaced by a serine%2C with low disulfide reductase but efficient disulfide isomerase activity.;symbol=CXXS1;Alias=ATCXXS1,C-terminal cysteine residue is changed to a serine 1;full_name=C-termina…	GO:0005737,GO:0005829,GO:0005576,GO:0045454,GO:0003756
spissifolium	female-biased	OG0012160
spissifolium	female-biased	OG0012272	AT4G05110	ID=AT4G05110;Name=AT4G05110;Note=equilibrative nucleoside transporter 6;symbol=ENT6;Alias=ATENT6;full_name=equilibrative nucleoside transporter 6;computational_description=equilibrative nucleoside transporter 6 (ENT6)%3B FUNCTIONS IN: nucleoside transmembrane transporter activity%3B INVOLVED IN: transport%3B LOCATED IN: plasma membrane%3B CONTAINS InterPro DOMAIN/s: Delayed-early response protein…	GO:0005337,GO:0016021,GO:1901642,GO:0005739,GO:0015858,GO:0005886
spissifolium	female-biased	OG0012386
spissifolium	female-biased	OG0012621	AT5G49360	ID=AT5G49360;Name=AT5G49360;Note=beta-xylosidase 1;curator_summary=Encodes a bifunctional %7Bbeta%7D-D-xylosidase/%7Balpha%7D-L-arabinofuranosidase required for pectic arabinan modification. Located in the extracellular matrix. Gene is expressed specifically in tissues undergoing secondary wall thickening. This is a member of glycosyl hydrolase family 3 and has six other closely related members.;…	GO:0010214,GO:0009536,GO:0046556,GO:0009044,GO:0048046,GO:0005576,GO:0004553,GO:0031222,GO:0045493,GO:0009505
spissifolium	female-biased	OG0012769
spissifolium	female-biased	OG0013385
spissifolium	female-biased	OG0014886	AT2G07695	ID=AT2G07695;Name=AT2G07695;Note=Cytochrome C oxidase subunit II-like%2C transmembrane domain-containing protein;computational_description=Cytochrome C oxidase subunit II-like%2C transmembrane domain%3B FUNCTIONS IN: electron carrier activity%2C cytochrome-c oxidase activity%2C copper ion binding%2C heme binding%3B INVOLVED IN: electron transport chain%2C respiratory electron transport chain%3B L…	GO:0005739
spissifolium	female-biased	OG0015746	AT1G22770	ID=AT1G22770;Name=AT1G22770;Note=gigantea protein (GI);curator_summary=Together with CONSTANTS (CO) and FLOWERING LOCUS T (FT)%2C GIGANTEA promotes flowering under long days in a circadian clock-controlled flowering pathway. GI acts earlier than CO and FT in the pathway by increasing CO and FT mRNA abundance. Located in the nucleus. Regulates several developmental processes%2C including photoperi…	GO:0005737,GO:0007623,GO:0009585,GO:0042542,GO:0006950,GO:0048586,GO:0048578,GO:0030154,GO:0010378,GO:0010218,GO:0009637,GO:0005654,GO:0006355,GO:0042752,GO:0005515,GO:0009409,GO:0080167,GO:0009908,GO:0005634
spissifolium	female-biased	OG0016619	AT1G21640	ID=AT1G21640;Name=AT1G21640;Note=NAD kinase 2;curator_summary=Encodes a protein with NAD kinase activity. The protein was also shown to bind calmodulin.;symbol=NADK2;Alias=ATNADK2,NAD KINASE 2;full_name=NAD kinase 2;computational_description=NAD kinase 2 (NADK2)%3B FUNCTIONS IN: NAD+ kinase activity%2C calmodulin binding%3B INVOLVED IN: pyridine nucleotide biosynthetic process%2C metabolic proces…	GO:0019674,GO:0016310,GO:0005524,GO:0005516,GO:0003951,GO:0006741,GO:0009507
spissifolium	female-biased	OG0017234
spissifolium	female-biased	OG0025794	AT4G27340	ID=AT4G27340;Name=AT4G27340;Note=Met-10+ like family protein;computational_description=Met-10+ like family protein%3B CONTAINS InterPro DOMAIN/s: Protein of unknown function Met10 (InterPro:IPR003402)%3B BEST Arabidopsis thaliana protein match is: S-adenosyl-L-methionine-dependent methyltransferases superfamily protein (TAIR:AT3G56120.1)%3B Has 1666 Blast hits to 1640 proteins in 617 species: Arc…	GO:0005737,GO:0030488,GO:0005634,GO:0002939,GO:0008175,GO:0005759,GO:0009507,GO:0052906,GO:0009019
spissifolium	female-biased	OG0025994
xanthoconus	male-biased	OG0000177	AT2G32060	ID=AT2G32060;Name=AT2G32060;Note=Ribosomal protein L7Ae/L30e/S12e/Gadd45 family protein;computational_description=Ribosomal protein L7Ae/L30e/S12e/Gadd45 family protein%3B FUNCTIONS IN: structural constituent of ribosome%3B INVOLVED IN: translation%3B LOCATED IN: cytosolic small ribosomal subunit%2C cytosolic ribosome%2C nucleus%3B EXPRESSED IN: 22 plant structures%3B EXPRESSED DURING: 13 growth …	GO:0022626,GO:0022627,GO:0005634,GO:0005777,GO:0003735,GO:0006412
xanthoconus	male-biased	OG0001354
xanthoconus	male-biased	OG0001443	AT1G69490	ID=AT1G69490;Name=AT1G69490;Note=NAC-like%2C activated by AP3/PI;curator_summary=Encodes a member of the NAC transcription factor gene family. It is expressed in floral primordia and upregulated by AP3 and PI. Its expression is associated with leaf senescence.;symbol=NAP;Alias=ANAC029,Arabidopsis NAC domain containing protein 29,ATNAP,NAC-LIKE, ACTIVATED BY AP3/PI;full_name=NAC-like%2C activated …	GO:0044212,GO:0009825,GO:0009835,GO:0010150,GO:0003700,GO:0005634,GO:0006355,GO:0009793,GO:0005515,GO:0009908
xanthoconus	male-biased	OG0002185	AT5G48850	ID=AT5G48850;Name=AT5G48850;Note=Tetratricopeptide repeat (TPR)-like superfamily protein;curator_summary=homologous to the wheat sulphate deficiency-induced gene sdi1. Expression in root and leaf is induced by sulfur starvation. Knockout mutants retained higher root and leaf sulfate concentrations%2C indicating a role in regulation of stored sulfate pools.;symbol=ATSDI1;full_name=SULPHUR DEFICIEN…	GO:0006792,GO:0005634,GO:0010438,GO:0010439,GO:0005515,GO:0090568
xanthoconus	male-biased	OG0003639	AT5G15520	ID=AT5G15520;Name=AT5G15520;Note=Ribosomal protein S19e family protein;computational_description=Ribosomal protein S19e family protein%3B FUNCTIONS IN: structural constituent of ribosome%3B INVOLVED IN: translation%3B LOCATED IN: cytosolic small ribosomal subunit%2C ribosome%2C nucleolus%2C membrane%3B EXPRESSED IN: 23 plant structures%3B EXPRESSED DURING: 14 growth stages%3B CONTAINS InterPro DO…	GO:0003735,GO:0022627,GO:0005730,GO:0005829,GO:0006412,GO:0000028,GO:0003723,GO:0005634,GO:0009506,GO:0003729
xanthoconus	male-biased	OG0004208	AT2G33040	ID=AT2G33040;Name=AT2G33040;Note=gamma subunit of Mt ATP synthase;symbol=ATP3;full_name=gamma subunit of Mt ATP synthase;computational_description=gamma subunit of Mt ATP synthase (ATP3)%3B FUNCTIONS IN: zinc ion binding%3B INVOLVED IN: proton transport%2C ATP synthesis coupled proton transport%3B LOCATED IN: in 7 components%3B EXPRESSED IN: 27 plant structures%3B EXPRESSED DURING: 17 growth stag…	GO:0005737,GO:0015986,GO:0005783,GO:0046933,GO:0005618,GO:0005634,GO:0005730,GO:0005739,GO:0000275,GO:0005753,GO:0008270,GO:0006754,GO:0009507
xanthoconus	male-biased	OG0004483
xanthoconus	male-biased	OG0005910	AT3G12587	ID=AT3G12587;Name=AT3G12587;Note=Oligosaccaryltransferase;computational_description=Oligosaccaryltransferase%3B FUNCTIONS IN: molecular_function unknown%3B INVOLVED IN: biological_process unknown%3B LOCATED IN: endomembrane system%3B CONTAINS InterPro DOMAIN/s: Oligosaccaryltransferase (InterPro:IPR018943)%3B BEST Arabidopsis thaliana protein match is: Oligosaccaryltransferase (TAIR:AT5G02502.1)%…	GO:0008150,GO:0016021,GO:0005789,GO:0003674,GO:0009507
xanthoconus	male-biased	OG0005971	AT5G10695	ID=AT5G10695;Name=AT5G10695;Note=methionyl-tRNA synthetase;computational_description=unknown protein%3B BEST Arabidopsis thaliana protein match is: unknown protein (TAIR:AT5G57123.1)%3B Has 30201 Blast hits to 17322 proteins in 780 species: Archae - 12%3B Bacteria - 1396%3B Metazoa - 17338%3B Fungi - 3422%3B Plants - 5037%3B Viruses - 0%3B Other Eukaryotes - 2996 (source: NCBI BLink).;Dbxref=PMID…	GO:0004812,GO:0005576,GO:0008150,GO:0005739
xanthoconus	male-biased	OG0006166	AT3G14760	ID=AT3G14760;Name=AT3G14760;Note=transmembrane protein;computational_description=unknown protein%3B FUNCTIONS IN: molecular_function unknown%3B INVOLVED IN: biological_process unknown%3B LOCATED IN: endomembrane system%3B EXPRESSED IN: 6 plant structures%3B EXPRESSED DURING: LP.04 four leaves visible%2C LP.02 two leaves visible%3B Has 63 Blast hits to 63 proteins in 13 species: Archae - 0%3B Bact…	GO:0003674,GO:0016021,GO:0008150
xanthoconus	male-biased	OG0007229
xanthoconus	male-biased	OG0008312	AT2G35360	ID=AT2G35360;Name=AT2G35360;Note=ubiquitin family protein;computational_description=ubiquitin family protein%3B CONTAINS InterPro DOMAIN/s: Ubiquitin (InterPro:IPR000626)%2C Ubiquitin supergroup (InterPro:IPR019955)%2C Domain of unknown function SAYSvFN (InterPro:IPR019387)%3B Has 81 Blast hits to 81 proteins in 37 species: Archae - 0%3B Bacteria - 0%3B Metazoa - 40%3B Fungi - 0%3B Plants - 33%3B…	GO:0005634,GO:0003674,GO:0016021
xanthoconus	male-biased	OG0009317	AT2G47710	ID=AT2G47710;Name=AT2G47710;Note=Adenine nucleotide alpha hydrolases-like superfamily protein;computational_description=Adenine nucleotide alpha hydrolases-like superfamily protein%3B FUNCTIONS IN: molecular_function unknown%3B INVOLVED IN: response to stress%3B LOCATED IN: vacuole%3B EXPRESSED IN: 23 plant structures%3B EXPRESSED DURING: 13 growth stages%3B CONTAINS InterPro DOMAIN/s: UspA (Inte…	GO:0005737,GO:0016787,GO:0005794,GO:0005773,GO:0005829,GO:0005886
xanthoconus	male-biased	OG0009540	AT3G62920	ID=AT3G62920;Name=AT3G62920;Note=zinc metalloproteinase aureolysin;computational_description=unknown protein%3B Has 25 Blast hits to 25 proteins in 11 species: Archae - 0%3B Bacteria - 0%3B Metazoa - 0%3B Fungi - 0%3B Plants - 25%3B Viruses - 0%3B Other Eukaryotes - 0 (source: NCBI BLink).;Dbxref=PMID:16776300,PMID:18650403,locus:2099147;locus_type=protein_coding	GO:0008150,GO:0003674,GO:0009507
xanthoconus	male-biased	OG0010061	AT5G49015	ID=AT5G49015;Name=AT5G49015;Note=Expressed protein;computational_description=Expressed protein%3B Has 35333 Blast hits to 34131 proteins in 2444 species: Archae - 798%3B Bacteria - 22429%3B Metazoa - 974%3B Fungi - 991%3B Plants - 531%3B Viruses - 0%3B Other Eukaryotes - 9610 (source: NCBI BLink).;Dbxref=PMID:20032078,locus:1006230537;locus_type=protein_coding	GO:0005575,GO:0008150,GO:0003674
xanthoconus	male-biased	OG0010451	ATMG00513	ID=ATMG00513;Note=NADH dehydrogenase 5A;Name=ATMG00513;curator_summary=Mitochondrial NADH dehydrogenase subunit 5. The gene is trans-spliced from three different pre-cursors%2C NAD5a%2C NAD5b and NAD5c.;symbol=NAD5A;Alias=NAD5.1,NADH DEHYDROGENASE 5.1,NAD5,NADH DEHYDROGENASE SUBUNIT 5;full_name=NADH dehydrogenase 5A;computational_description=NADH dehydrogenase 5A (NAD5A)%3B CONTAINS InterPro DOMA…	GO:0008137,GO:0016021,GO:0005739,GO:0042773,GO:0005743,GO:0045333,GO:0005747,GO:0070469,GO:0003954,GO:0055114
xanthoconus	male-biased	OG0010495	AT5G59770	ID=AT5G59770;Name=AT5G59770;Note=Protein-tyrosine phosphatase-like%2C PTPLA;computational_description=Protein-tyrosine phosphatase-like%2C PTPLA%3B CONTAINS InterPro DOMAIN/s: Protein-tyrosine phosphatase-like%2C PTPLA (InterPro:IPR007482)%3B BEST Arabidopsis thaliana protein match is: Protein-tyrosine phosphatase-like%2C PTPLA (TAIR:AT5G10480.2)%3B Has 698 Blast hits to 698 proteins in 198 speci…	GO:0030148,GO:0102158,GO:0018812,GO:0102343,GO:0102344,GO:0102345,GO:0030497,GO:0030176,GO:0042761
xanthoconus	male-biased	OG0010839	AT5G26220	ID=AT5G26220;Name=AT5G26220;Note=ChaC-like family protein;Alias=AtGGCT2%3B1,GGCT2%3B1,gamma-glutamyl cyclotransferase 2%3B1;computational_description=ChaC-like family protein%3B CONTAINS InterPro DOMAIN/s: ChaC-like protein (InterPro:IPR006840)%3B BEST Arabidopsis thaliana protein match is: ChaC-like family protein (TAIR:AT4G31290.1)%3B Has 1807 Blast hits to 1807 proteins in 277 species: Archae …	GO:0046686,GO:0006751,GO:0010288,GO:0005737,GO:0003839
xanthoconus	male-biased	OG0011030	ATMG00160	ID=ATMG00160;Note=cytochrome oxidase 2;Name=ATMG00160;curator_summary=cytochrome c oxidase subunit 2;symbol=COX2;full_name=cytochrome oxidase 2;computational_description=cytochrome oxidase 2 (COX2)%3B FUNCTIONS IN: cytochrome-c oxidase activity%3B INVOLVED IN: respiratory electron transport chain%3B LOCATED IN: mitochondrion%2C chloroplast%2C mitochondrial respiratory chain complex IV%3B EXPRESSE…	GO:0004129,GO:0009536,GO:0016021,GO:0005739,GO:0005751,GO:0005743,GO:0022900,GO:0022904,GO:0070469,GO:0005507,GO:0042773,GO:0009507
xanthoconus	male-biased	OG0011230
xanthoconus	male-biased	OG0011856	AT5G19875	ID=AT5G19875;Name=AT5G19875;Note=transmembrane protein;computational_description=unknown protein%3B FUNCTIONS IN: molecular_function unknown%3B INVOLVED IN: response to oxidative stress%3B LOCATED IN: endomembrane system%3B EXPRESSED IN: 21 plant structures%3B EXPRESSED DURING: 13 growth stages%3B BEST Arabidopsis thaliana protein match is: unknown protein (TAIR:AT2G31940.1)%3B Has 30201 Blast hi…	GO:0016021,GO:0003674,GO:0006979,GO:0005739
xanthoconus	male-biased	OG0012003	AT4G30845	ID=AT4G30845;Name=AT4G30845;Note=DNA-directed RNA polymerase subunit beta;computational_description=unknown protein%3B FUNCTIONS IN: molecular_function unknown%3B INVOLVED IN: biological_process unknown%3B LOCATED IN: chloroplast%3B Has 16 Blast hits to 16 proteins in 8 species: Archae - 0%3B Bacteria - 0%3B Metazoa - 0%3B Fungi - 0%3B Plants - 16%3B Viruses - 0%3B Other Eukaryotes - 0 (source: N…	GO:0003899,GO:0008150
xanthoconus	male-biased	OG0012102	AT2G31090	ID=AT2G31090;Name=AT2G31090;Note=transmembrane protein;computational_description=unknown protein%3B FUNCTIONS IN: molecular_function unknown%3B INVOLVED IN: biological_process unknown%3B LOCATED IN: endomembrane system%3B EXPRESSED IN: 24 plant structures%3B EXPRESSED DURING: 13 growth stages%3B BEST Arabidopsis thaliana protein match is: unknown protein (TAIR:AT2G20562.1)%3B Has 70 Blast hits to…	GO:0005615,GO:0009416,GO:0005886,GO:0003674,GO:0010199,GO:0048530
xanthoconus	male-biased	OG0012614	AT3G53620	ID=AT3G53620;Name=AT3G53620;Note=pyrophosphorylase 4;curator_summary=Encodes a soluble protein with inorganic pyrophosphatase activity that is highly specific for Mg-inorganic pyrophosphate.;symbol=PPa4;Alias=AtPPa4,pyrophosphorylase 4;full_name=pyrophosphorylase 4;computational_description=pyrophosphorylase 4 (PPa4)%3B FUNCTIONS IN: inorganic diphosphatase activity%3B INVOLVED IN: response to ca…	GO:0005737,GO:0004427,GO:0005829,GO:0000287,GO:0005654,GO:0006796,GO:0046686
xanthoconus	male-biased	OG0013488	AT3G29010	ID=AT3G29010;Name=AT3G29010;Note=Biotin/lipoate A/B protein ligase family;computational_description=Biotin/lipoate A/B protein ligase family%3B FUNCTIONS IN: catalytic activity%3B INVOLVED IN: protein modification process%3B LOCATED IN: cellular_component unknown%3B EXPRESSED IN: 21 plant structures%3B EXPRESSED DURING: 13 growth stages%3B CONTAINS InterPro DOMAIN/s: Biotin/lipoate A/B protein li…	GO:0005737,GO:0005634,GO:0016874,GO:0005739,GO:0006464
xanthoconus	male-biased	OG0016482	AT2G29500	ID=AT2G29500;Name=AT2G29500;Note=HSP20-like chaperones superfamily protein;computational_description=HSP20-like chaperones superfamily protein%3B CONTAINS InterPro DOMAIN/s: Heat shock protein Hsp20 (InterPro:IPR002068)%2C HSP20-like chaperone (InterPro:IPR008978)%3B BEST Arabidopsis thaliana protein match is: HSP20-like chaperones superfamily protein (TAIR:AT1G07400.1)%3B Has 6873 Blast hits to …	GO:0051259,GO:0005737,GO:0006457,GO:0051082,GO:0000302,GO:0009651,GO:0009408,GO:0006979,GO:0043621
xanthoconus	male-biased	OG0017250
xanthoconus	male-biased	OG0026238	AT3G57720	ID=AT3G57720;Name=AT3G57720;Note=Protein kinase superfamily protein;computational_description=Protein kinase superfamily protein%3B FUNCTIONS IN: protein kinase activity%2C kinase activity%2C ATP binding%3B INVOLVED IN: protein amino acid phosphorylation%3B LOCATED IN: cellular_component unknown%3B CONTAINS InterPro DOMAIN/s: Protein kinase%2C catalytic domain (InterPro:IPR000719)%2C Serine/threo…	GO:0006468,GO:0016310,GO:0004674,GO:0007166,GO:0005886,GO:0005524
xanthoconus	male-biased	OG0026277	AT5G55250	ID=AT5G55250;Name=AT5G55250;Note=IAA carboxylmethyltransferase 1;curator_summary=Encodes an enzyme which specifically converts IAA to its methyl ester form MelIAA. This gene belongs to the family of carboxyl methyltransferases whose members catalyze the transfer of the methyl group from S-adenosyl-L-methionine to carboxylic acid-containing substrates to form small molecule methyl esters. Expressi…	GO:0009944,GO:0010252,GO:0008757,GO:0000287,GO:0005575,GO:0042802,GO:0103007,GO:0032259,GO:0051749
xanthoconus	male-biased	OG0026319	AT3G15353	ID=AT3G15353;Name=AT3G15353;Note=metallothionein 3;curator_summary=metallothionein%2C binds to and detoxifies excess copper and other metals%2C limiting oxidative damage;symbol=MT3;Alias=ATMT3;full_name=metallothionein 3;computational_description=metallothionein 3 (MT3)%3B Has 268 Blast hits to 268 proteins in 64 species: Archae - 0%3B Bacteria - 0%3B Metazoa - 0%3B Fungi - 0%3B Plants - 268%3B V…	GO:0005623,GO:0005507,GO:0008270,GO:0006878,GO:0005576
xanthoconus	female-biased	OG0000125	AT1G70320	ID=AT1G70320;Name=AT1G70320;Note=ubiquitin-protein ligase 2;curator_summary=encodes a ubiquitin-protein ligase-like protein containing a HECT domain. There are six other HECT-domain UPLs in Arabidopsis.;symbol=UPL2;full_name=ubiquitin-protein ligase 2;computational_description=ubiquitin-protein ligase 2 (UPL2)%3B FUNCTIONS IN: ubiquitin-protein ligase activity%3B INVOLVED IN: protein ubiquitinati…	GO:0005737,GO:0061630,GO:0005829,GO:0000151,GO:0005739,GO:0016567,GO:0006511,GO:0004842,GO:0005634
xanthoconus	female-biased	OG0000215	AT5G23960	ID=AT5G23960;Name=AT5G23960;Note=terpene synthase 21;curator_summary=Encodes a sesquiterpene synthase involved in generating all of the group A sesquiterpenes found in the Arabidopsis floral volatile blend. Strongly expressed in the stigma.;symbol=TPS21;Alias=ATTPS21;full_name=terpene synthase 21;computational_description=terpene synthase 21 (TPS21)%3B CONTAINS InterPro DOMAIN/s: Terpene synthase…	GO:0005737,GO:0080016,GO:0080027,GO:0080017,GO:0000287,GO:0051762,GO:0016106,GO:0009507
xanthoconus	female-biased	OG0000325	AT5G67360	ID=AT5G67360;Name=AT5G67360;Note=Subtilase family protein;curator_summary=Encodes a subtilisin-like serine protease essential for mucilage release from seed coats.;symbol=ARA12;computational_description=ARA12%3B FUNCTIONS IN: serine-type endopeptidase activity%3B INVOLVED IN: proteolysis%2C seed coat development%2C mucilage metabolic process involved seed coat development%2C mucilage extrusion fr…	GO:0004252,GO:0010214,GO:0099503,GO:0005618,GO:0080001,GO:0048046,GO:0005576,GO:0048359,GO:0006508
xanthoconus	female-biased	OG0000356	AT1G80760	ID=AT1G80760;Name=AT1G80760;Note=NOD26-like intrinsic protein 6%3B1;curator_summary=Encodes a protein with boron transporter activity. It helps to preferentially direct boron to young developing tissues in the shoot%2C such as immature leaves%2C under low boron conditions. This boron channel appears to be impermeable to water%2C unlike the closely related NIP5%3B1 boron transporter. This protein …	GO:0080029,GO:0015204,GO:0046713,GO:0046715,GO:0015250,GO:0015267,GO:0005886,GO:0015168,GO:0016021
xanthoconus	female-biased	OG0000359	AT2G30490	ID=AT2G30490;Name=AT2G30490;Note=cinnamate-4-hydroxylase;curator_summary=Encodes a cinnamate-4-hydroxylase. Mutations in this gene impact phenylpropanoid metabolism%2C growth and development.;symbol=C4H;Alias=ATC4H,CINNAMATE 4-HYDROXYLASE,CYP73A5,REF3,REDUCED EPRDERMAL FLUORESCENCE 3;full_name=cinnamate-4-hydroxylase;computational_description=cinnamate-4-hydroxylase (C4H)%3B FUNCTIONS IN: trans-c…	GO:0005783,GO:0009416,GO:0009698,GO:0009699,GO:0009808,GO:0009555,GO:0016709,GO:0016021,GO:0016020,GO:0005777,GO:0009611,GO:0005774,GO:0009506,GO:0080167,GO:0005506,GO:0006744,GO:0042802,GO:0032502,GO:0005794,GO:0020037,GO:0005886,GO:0009505,GO:0055114,GO:0016710,GO:0005576,GO:0005515
xanthoconus	female-biased	OG0000452	AT5G13930	ID=AT5G13930;Name=AT5G13930;Note=Chalcone and stilbene synthase family protein;curator_summary=Encodes chalcone synthase (CHS)%2C a key enzyme involved in the biosynthesis of flavonoids. Required for the accumulation of purple anthocyanins in leaves and stems. Also involved in the regulation of auxin transport and the modulation of root gravitropism.;symbol=TT4;Alias=ATCHS,CHS,CHALCONE SYNTHASE;f…	GO:0009733,GO:0009629,GO:0009705,GO:0005783,GO:0009753,GO:0016210,GO:0005634,GO:0009715,GO:0009813,GO:0009611,GO:0009926,GO:0005515,GO:0010224,GO:0006979,GO:0005737,GO:0031540
xanthoconus	female-biased	OG0000569	AT1G62660	ID=AT1G62660;Name=AT1G62660;Note=Glycosyl hydrolases family 32 protein;computational_description=Glycosyl hydrolases family 32 protein%3B FUNCTIONS IN: hydrolase activity%2C hydrolyzing O-glycosyl compounds%3B INVOLVED IN: sucrose catabolic process%2C using beta-fructofuranosidase%2C carbohydrate metabolic process%3B LOCATED IN: vacuole%3B EXPRESSED IN: 23 plant structures%3B EXPRESSED DURING: 12…	GO:0071370,GO:0016020,GO:0000325,GO:0009617,GO:0009737,GO:0005773,GO:0016021,GO:0009738,GO:0005985,GO:0005775,GO:0009414,GO:0004575,GO:0009651,GO:0005634
xanthoconus	female-biased	OG0000709
xanthoconus	female-biased	OG0000802	AT5G37020	ID=AT5G37020;Name=AT5G37020;Note=auxin response factor 8;curator_summary=Encodes a member of the auxin response factor family. Mediates auxin response via expression of auxin regulated genes. Acts redundantly with ARF6 to control stamen elongation and flower maturation. Expression of ARF8 is controlled by miR167.;symbol=ARF8;Alias=ATARF8;full_name=auxin response factor 8;computational_description…	GO:0009733,GO:0044212,GO:0010154,GO:0043565,GO:0003700,GO:0005634,GO:0009734,GO:0006355,GO:0005515,GO:0009908
xanthoconus	female-biased	OG0000914	AT5G47450	ID=AT5G47450;Name=AT5G47450;Note=tonoplast intrinsic protein 2%3B3;curator_summary=Tonoplast intrinsic protein%2C transports ammonium (NH3) and methylammonium across the tonoplast membrane%2C gene expression shows diurnal regulation and is upregulated by ammonium (NH3).;symbol=TIP2%3B3;Alias=ATTIP2%3B3,ARABIDOPSIS THALIANA TONOPLAST INTRINSIC PROTEIN 2%3B3,DELTA-TIP3,DELTA-TONOPLAST INTRINSIC PRO…	GO:0008519,GO:0016021,GO:0015200,GO:0009705,GO:0015250,GO:0009651,GO:0042807
xanthoconus	female-biased	OG0001123	AT1G08250	ID=AT1G08250;Name=AT1G08250;Note=arogenate dehydratase 6;curator_summary=Encodes a plastid-localized arogenate dehydratase involved in phenylalanine biosynthesis. Although this enzyme has sequence similarity to prephenate dehydratases%2C it is 98 times more active with arogenate than prephenate in enzymatic assays.;symbol=ADT6;Alias=AtADT6,Arabidopsis thaliana arogenate dehydratase 6;full_name=ar…	GO:0005737,GO:0009570,GO:0004664,GO:0009094,GO:0047769,GO:0009507
xanthoconus	female-biased	OG0001155	AT2G21050	ID=AT2G21050;Name=AT2G21050;Note=like AUXIN RESISTANT 2;curator_summary=Encodes LAX2 (LIKE AUXIN RESISTANT)%2C a member of the AUX1 LAX family of auxin influx carriers. Required for the establishment of embryonic root cell organization.;symbol=LAX2;full_name=like AUXIN RESISTANT 2;computational_description=like AUXIN RESISTANT 2 (LAX2)%3B CONTAINS InterPro DOMAIN/s: Amino acid transporter%2C tran…	GO:0016021,GO:0048829,GO:0015293,GO:0009734,GO:0010588,GO:0009624,GO:0015171,GO:0005886,GO:0003333
xanthoconus	female-biased	OG0001182	AT5G13930	ID=AT5G13930;Name=AT5G13930;Note=Chalcone and stilbene synthase family protein;curator_summary=Encodes chalcone synthase (CHS)%2C a key enzyme involved in the biosynthesis of flavonoids. Required for the accumulation of purple anthocyanins in leaves and stems. Also involved in the regulation of auxin transport and the modulation of root gravitropism.;symbol=TT4;Alias=ATCHS,CHS,CHALCONE SYNTHASE;f…	GO:0009733,GO:0009629,GO:0009705,GO:0005783,GO:0009753,GO:0016210,GO:0005634,GO:0009715,GO:0009813,GO:0009611,GO:0009926,GO:0005515,GO:0010224,GO:0006979,GO:0005737,GO:0031540
xanthoconus	female-biased	OG0001527	AT3G51240	ID=AT3G51240;Name=AT3G51240;Note=flavanone 3-hydroxylase;curator_summary=Encodes flavanone 3-hydroxylase that is coordinately expressed with chalcone synthase and chalcone isomerases. Regulates flavonoid biosynthesis. Not responsive to auxin or ethylene stimulus (qRT-PCR).;symbol=F3H;Alias=F3'H,TT6,TRANSPARENT TESTA 6;full_name=flavanone 3-hydroxylase;computational_description=flavanone 3-hydroxy…	GO:0005737,GO:0031418,GO:0046872,GO:0051213,GO:0009813,GO:0055114,GO:0010224,GO:0005524,GO:0045486
xanthoconus	female-biased	OG0002386	AT2G31160	ID=AT2G31160;Name=AT2G31160;Note=LIGHT-DEPENDENT SHORT HYPOCOTYLS-like protein (DUF640);symbol=LSH3;Alias=OBO1,ORGAN BOUNDARY 1;full_name=LIGHT SENSITIVE HYPOCOTYLS 3;computational_description=LIGHT SENSITIVE HYPOCOTYLS 3 (LSH3)%3B CONTAINS InterPro DOMAIN/s: Protein of unknown function DUF640 (InterPro:IPR006936)%3B BEST Arabidopsis thaliana protein match is: Protein of unknown function (DUF640)…	GO:0048441,GO:0010492,GO:0005634,GO:0048834,GO:0009416,GO:0003677,GO:0090698,GO:0010199
xanthoconus	female-biased	OG0004450	AT1G61720	ID=AT1G61720;Name=AT1G61720;Note=NAD(P)-binding Rossmann-fold superfamily protein;curator_summary=Negative regulator of flavonoid biosynthesis%2C mutants accumulate flavonoid pigments in their seed coat%2C putative oxidoreductase. It is thought that a ternary complex composed of TT2%2C TT8 and TTG1 is necessary for correct expression of BAN in seed endothelium.;symbol=BAN;full_name=BANYULS;comput…	GO:0050662,GO:0016616,GO:0009964,GO:0033729,GO:0009813,GO:0009507,GO:0055114,GO:0016491
xanthoconus	female-biased	OG0004857	AT1G36160	ID=AT1G36160;Name=AT1G36160;Note=acetyl-CoA carboxylase 1;curator_summary=Encodes acetyl-CoA carboxylase. Mutant displays uncoordinated cell divisions which are enhanced by cytokinins. Mutant also has aberrant organization of the apical region in the embryo and abnormal root and shoot development and is deficient in freezing tolerance after cold acclimation. Essential for very long chain fatty ac…	GO:0010072,GO:0005737,GO:0009735,GO:0003989,GO:0005634,GO:0009631,GO:0009933,GO:0030497,GO:0048367,GO:0009793,GO:0048364,GO:0005886,GO:0004075,GO:0046872,GO:0005829,GO:0005524,GO:2001295
xanthoconus	female-biased	OG0004878	AT5G08640	ID=AT5G08640;Name=AT5G08640;Note=flavonol synthase 1;curator_summary=Encodes a flavonol synthase that catalyzes formation of flavonols from dihydroflavonols. Co-expressed with CHI and CHS (qRT-PCR).;symbol=FLS1;Alias=ATFLS1,FLS,FLAVONOL SYNTHASE;full_name=flavonol synthase 1;computational_description=flavonol synthase 1 (FLS1)%3B CONTAINS InterPro DOMAIN/s: Oxoglutarate/iron-dependent oxygenase (…	GO:0005737,GO:0031418,GO:0045431,GO:0051213,GO:0005634,GO:0009813,GO:0009733,GO:0009416,GO:0005515,GO:0080167,GO:0046872,GO:0055114,GO:0045486
xanthoconus	female-biased	OG0004911	AT1G36160	ID=AT1G36160;Name=AT1G36160;Note=acetyl-CoA carboxylase 1;curator_summary=Encodes acetyl-CoA carboxylase. Mutant displays uncoordinated cell divisions which are enhanced by cytokinins. Mutant also has aberrant organization of the apical region in the embryo and abnormal root and shoot development and is deficient in freezing tolerance after cold acclimation. Essential for very long chain fatty ac…	GO:0010072,GO:0005737,GO:0009735,GO:0003989,GO:0005634,GO:0009631,GO:0009933,GO:0030497,GO:0048367,GO:0009793,GO:0048364,GO:0005886,GO:0004075,GO:0046872,GO:0005829,GO:0005524,GO:2001295
xanthoconus	female-biased	OG0005663	AT3G06130	ID=AT3G06130;Name=AT3G06130;Note=Heavy metal transport/detoxification superfamily protein;computational_description=Heavy metal transport/detoxification superfamily protein %3B FUNCTIONS IN: metal ion binding%3B INVOLVED IN: metal ion transport%3B LOCATED IN: cell wall%3B EXPRESSED IN: 21 plant structures%3B EXPRESSED DURING: 13 growth stages%3B CONTAINS InterPro DOMAIN/s: Heavy metal transport/d…	GO:0005737,GO:0005618,GO:0046872,GO:0030001
xanthoconus	female-biased	OG0005911	AT3G51630	ID=AT3G51630;Name=AT3G51630;Note=with no lysine (K) kinase 5;curator_summary=Encodes a member of the WNK family (9 members in all) of protein kinases%2C the structural design of which is clearly distinct from those of other known protein kinases%2C such as receptor-like kinases and mitogen-activated protein kinases.;symbol=WNK5;Alias=ATWNK5,ZIK1;full_name=with no lysine (K) kinase 5;computational…	GO:0005737,GO:0048573,GO:0006468,GO:0004672,GO:0004674,GO:0005515,GO:0005886,GO:0043424,GO:0035556,GO:0005524
xanthoconus	female-biased	OG0006511	AT5G25770	ID=AT5G25770;Name=AT5G25770;Note=alpha/beta-Hydrolases superfamily protein;computational_description=alpha/beta-Hydrolases superfamily protein%3B CONTAINS InterPro DOMAIN/s: Acetyl xylan esterase (InterPro:IPR008391)%3B Has 1590 Blast hits to 1588 proteins in 559 species: Archae - 54%3B Bacteria - 1372%3B Metazoa - 0%3B Fungi - 31%3B Plants - 36%3B Viruses - 0%3B Other Eukaryotes - 97 (source: NC…	GO:0016787,GO:0008150,GO:0009507
xanthoconus	female-biased	OG0006726	AT3G21250	ID=AT3G21250;Name=AT3G21250;Note=multidrug resistance-associated protein 6;curator_summary=member of MRP subfamily;symbol=ABCC8;Alias=ATMRP6,ARABIDOPSIS THALIANA MULTIDRUG RESISTANCE-ASSOCIATED PROTEIN 6,MRP6,multidrug resistance-associated protein 6;full_name=ATP-binding cassette C8;computational_description=multidrug resistance-associated protein 6 (MRP6)%3B FUNCTIONS IN: ATPase activity%2C cou…	GO:0000325,GO:0016021,GO:0005829,GO:0016020,GO:0042626,GO:0005774,GO:0008559,GO:0016887,GO:0055085,GO:0005524,GO:0009507
xanthoconus	female-biased	OG0009646	AT3G59030	ID=AT3G59030;Name=AT3G59030;Note=MATE efflux family protein;curator_summary=Encodes a proton antiporter. Involved in the transportation of proanthocyanidin precursors into the vacuole. In vitro transport experiments showed that cyanidin-3-O-glucoside (anthocyanin) was an effective substrate%2C whereas the proanthocyanidin precursor epicatechin was not transported. However catechin-3-O-glucoside i…	GO:0016021,GO:0016020,GO:0015299,GO:0009813,GO:0009705,GO:0022857,GO:0042910,GO:0010231,GO:0005774,GO:0010023,GO:0009507
xanthoconus	female-biased	OG0009936	AT4G22880	ID=AT4G22880;Name=AT4G22880;Note=leucoanthocyanidin dioxygenase;curator_summary=encodes leucoanthocyanidin dioxygenase%2C which is involved in proanthocyanin biosynthesis. Mutant analysis suggests that this gene is also involved in vacuole formation.;symbol=LDOX;Alias=ANS,ANTHOCYANIDIN SYNTHASE,TDS4,TANNIN DEFICIENT SEED 4,TT18;full_name=leucoanthocyanidin dioxygenase;computational_description=le…	GO:0005737,GO:0009718,GO:0009753,GO:0051213,GO:0031418,GO:0050589,GO:0009611,GO:0055114,GO:0046872,GO:0010023,GO:0007033
xanthoconus	female-biased	OG0009979
xanthoconus	female-biased	OG0010046	AT3G10340	ID=AT3G10340;Name=AT3G10340;Note=phenylalanine ammonia-lyase 4;curator_summary=Encodes PAL4%2C a putative a phenylalanine ammonia-lyase. Arabidopsis has four PALs: AT2G37040 (PAL1)%2C AT3G53260 (PAL2)%2C AT5G04230 (PAL3) and AT3G10340 (PAL4).;symbol=PAL4;full_name=phenylalanine ammonia-lyase 4;computational_description=phenylalanine ammonia-lyase 4 (PAL4)%3B FUNCTIONS IN: ammonia-lyase activity%2…	GO:0005737,GO:0016841,GO:0006559,GO:0009800,GO:0045548,GO:0005515
xanthoconus	female-biased	OG0010102	AT4G13700	ID=AT4G13700;Name=AT4G13700;Note=purple acid phosphatase 23;symbol=PAP23;Alias=ATPAP23;full_name=purple acid phosphatase 23;computational_description=purple acid phosphatase 23 (PAP23)%3B FUNCTIONS IN: protein serine/threonine phosphatase activity%2C acid phosphatase activity%3B INVOLVED IN: biological_process unknown%3B LOCATED IN: endomembrane system%3B EXPRESSED IN: 6 plant structures%3B EXPRE…	GO:0016311,GO:0046872,GO:0005576,GO:0003993
xanthoconus	female-biased	OG0010648	AT5G07990	ID=AT5G07990;Name=AT5G07990;Note=Cytochrome P450 superfamily protein;curator_summary=Required for flavonoid 3' hydroxylase activity. Enzyme abundance relative to CHS determines Quercetin/Kaempferol metabolite ratio.;symbol=TT7;Alias=CYP75B1,CYTOCHROME P450 75B1,D501;full_name=TRANSPARENT TESTA 7;computational_description=TRANSPARENT TESTA 7 (TT7)%3B CONTAINS InterPro DOMAIN/s: Cytochrome P450 (In…	GO:0009733,GO:0020037,GO:0016709,GO:0016021,GO:0016020,GO:0016711,GO:0009813,GO:0005789,GO:0009411,GO:0005506,GO:0055114,GO:0005576
xanthoconus	female-biased	OG0010952	AT1G22640	ID=AT1G22640;Name=AT1G22640;Note=myb domain protein 3;curator_summary=MYB-type transcription factor (MYB3) that represses phenylpropanoid biosynthesis gene expression;symbol=MYB3;Alias=ATMYB3,ARABIDOPSIS THALIANA MYB DOMAIN PROTEIN 3;full_name=myb domain protein 3;computational_description=myb domain protein 3 (MYB3)%3B CONTAINS InterPro DOMAIN/s: SANT%2C DNA-binding (InterPro:IPR001005)%2C Homeo…	GO:0044212,GO:0009892,GO:0009751,GO:0043565,GO:0003700,GO:0005634,GO:0030154,GO:0009800,GO:0009611,GO:0005515,GO:0009651,GO:0009737
xanthoconus	female-biased	OG0010982	ATCG00480	ID=ATCG00480;Note=ATP synthase subunit beta;Name=ATCG00480;curator_summary=chloroplast-encoded gene for beta subunit of ATP synthase;symbol=PB;Alias=ATPB,ATP synthase subunit beta;full_name=ATP synthase subunit beta;computational_description=ATP synthase subunit beta (PB)%3B FUNCTIONS IN: hydrogen ion transmembrane transporter activity%2C zinc ion binding%3B INVOLVED IN: defense response to fungu…	GO:0009535,GO:0009534,GO:0015986,GO:0009507,GO:0009544,GO:0009817,GO:0010287,GO:0031977,GO:0015078,GO:0009570,GO:0005618,GO:0009536,GO:0005754,GO:0016887,GO:0045261,GO:0009409,GO:0009579,GO:0010319,GO:0008270
xanthoconus	female-biased	OG0011147	AT3G08640	ID=AT3G08640;Name=AT3G08640;Note=alphavirus core family protein (DUF3411);Alias=RER3,RETICULATA-RELATED 3;computational_description=Protein of unknown function (DUF3411)%3B FUNCTIONS IN: molecular_function unknown%3B INVOLVED IN: biological_process unknown%3B LOCATED IN: chloroplast%2C chloroplast envelope%3B EXPRESSED IN: 23 plant structures%3B EXPRESSED DURING: 13 growth stages%3B CONTAINS Inte…	GO:0031969,GO:0009941,GO:0009536,GO:0016021,GO:0000302,GO:0048366,GO:0009793,GO:0003674,GO:0009648,GO:0005829,GO:0009507
xanthoconus	female-biased	OG0011574	AT1G72520	ID=AT1G72520;Name=AT1G72520;Note=PLAT/LH2 domain-containing lipoxygenase family protein;symbol=LOX4;Alias=ATLOX4,Arabidopsis thaliana lipoxygenase 4;full_name=lipoxygenase 4;computational_description=PLAT/LH2 domain-containing lipoxygenase family protein%3B FUNCTIONS IN: oxidoreductase activity%2C acting on single donors with incorporation of molecular oxygen%2C incorporation of two atoms of oxyg…	GO:0080086,GO:0034440,GO:0031408,GO:0009555,GO:0009617,GO:0009611,GO:0016165,GO:0006952,GO:0009695,GO:0009901,GO:0010193,GO:0046872,GO:0048653,GO:0009507
xanthoconus	female-biased	OG0011588	AT5G13930	ID=AT5G13930;Name=AT5G13930;Note=Chalcone and stilbene synthase family protein;curator_summary=Encodes chalcone synthase (CHS)%2C a key enzyme involved in the biosynthesis of flavonoids. Required for the accumulation of purple anthocyanins in leaves and stems. Also involved in the regulation of auxin transport and the modulation of root gravitropism.;symbol=TT4;Alias=ATCHS,CHS,CHALCONE SYNTHASE;f…	GO:0009733,GO:0009629,GO:0009705,GO:0005783,GO:0009753,GO:0016210,GO:0005634,GO:0009715,GO:0009813,GO:0009611,GO:0009926,GO:0005515,GO:0010224,GO:0006979,GO:0005737,GO:0031540
xanthoconus	female-biased	OG0011688	AT2G21050	ID=AT2G21050;Name=AT2G21050;Note=like AUXIN RESISTANT 2;curator_summary=Encodes LAX2 (LIKE AUXIN RESISTANT)%2C a member of the AUX1 LAX family of auxin influx carriers. Required for the establishment of embryonic root cell organization.;symbol=LAX2;full_name=like AUXIN RESISTANT 2;computational_description=like AUXIN RESISTANT 2 (LAX2)%3B CONTAINS InterPro DOMAIN/s: Amino acid transporter%2C tran…	GO:0016021,GO:0048829,GO:0015293,GO:0009734,GO:0010588,GO:0009624,GO:0015171,GO:0005886,GO:0003333
xanthoconus	female-biased	OG0011879	AT5G07990	ID=AT5G07990;Name=AT5G07990;Note=Cytochrome P450 superfamily protein;curator_summary=Required for flavonoid 3' hydroxylase activity. Enzyme abundance relative to CHS determines Quercetin/Kaempferol metabolite ratio.;symbol=TT7;Alias=CYP75B1,CYTOCHROME P450 75B1,D501;full_name=TRANSPARENT TESTA 7;computational_description=TRANSPARENT TESTA 7 (TT7)%3B CONTAINS InterPro DOMAIN/s: Cytochrome P450 (In…	GO:0009733,GO:0020037,GO:0016709,GO:0016021,GO:0016020,GO:0016711,GO:0009813,GO:0005789,GO:0009411,GO:0005506,GO:0055114,GO:0005576
xanthoconus	female-biased	OG0013630	AT4G03500	ID=AT4G03500;Name=AT4G03500;Note=Ankyrin repeat family protein;computational_description=Ankyrin repeat family protein%3B CONTAINS InterPro DOMAIN/s: Ankyrin repeat-containing domain (InterPro:IPR020683)%2C Ankyrin repeat (InterPro:IPR002110)%3B BEST Arabidopsis thaliana protein match is: Ankyrin repeat family protein (TAIR:AT4G03460.1)%3B Has 38634 Blast hits to 17459 proteins in 653 species: Ar…	GO:0005737,GO:0016021,GO:0016020
xanthoconus	female-biased	OG0026088	ATCG00470	ID=ATCG00470;Note=ATP synthase epsilon chain;Name=ATCG00470;curator_summary=ATPase epsilon subunit;symbol=ATPE;full_name=ATP synthase epsilon chain;computational_description=ATP synthase epsilon chain (ATPE)%3B FUNCTIONS IN: hydrogen ion transporting ATP synthase activity%2C rotational mechanism%3B INVOLVED IN: cellular respiration%2C mitochondrial ATP synthesis coupled proton transport%3B LOCATE…	GO:0009535,GO:0009534,GO:0015986,GO:0046933,GO:0009941,GO:0045259,GO:0009536,GO:0045333,GO:0045261,GO:0042776,GO:0009579,GO:0009507

## Sheet: Table_S3
Table S3. Percentages, counts and cumulative fold-changes of sex-biased genes, and metrics of morphological leaf dimorphism for each of the Leucadendron species.
species	genes_in_DE_test	DEG_count	DEG_percent	Mbias_count	Mbias_cumulative_log2FC	Fbias_count	Fbias_cumulative_log2FC	mean_variance_of_counts	ratio of female over male leaf area	ratio of female over male leaf mass per area (specific leaf area)
brunioides	9348	34	0.363714	31	84.9091	3	-6.7856	3.32143e+08	1.38	1.00574
dubium	11125	279	2.50787	138	317.559	141	-219.037	9.00993e+08	1.08	1.01794
ericifolium	10177	10	0.0982608	7	26.5981	3	-7.48809	6.20616e+08	5.83	1.09346
linifolium	7449	23	0.308766	7	24.6488	16	-30.7539	4.38746e+08	1.22	0.826557
muirii	8128	18	0.221457	11	32.3752	7	-24.0426	2.99044e+08	1.33	1.11455
olens	9347	29	0.31026	17	50.6115	12	-25.3019	1.41725e+08	1.32	1.3032
platyspermum	9426	73	0.774454	11	36.7646	62	-162.992	1.2664e+09	4.4	1.36145
rubrum	8593	88	1.02409	26	37.4886	62	-136.172	6.21027e+08	1.49	1.31796
spissifolium	8923	100	1.1207	51	103.604	49	-83.8447	3.76223e+08	2.41	1.64383
xanthoconus	8075	68	0.842105	30	55.2019	38	-56.3426	3.67971e+08	1.62	0.790424

## Sheet: Table_S4
Table S4. Overview of the 63 genes that were sex-biased in two or more species among the set of ten Leucadendron species.
OG	spissifolium	xanthoconus	linifolium	brunioides	rubrum	dubium	platyspermum	muirii	ericifolium	olens	gains	losses	ancestral	description	AT_gene_hit_ID	AT_hit_description
OG0012323	0	0	0	0	Fbias	0	0	0	0	Mbias	2	0	NA	divergent_gains	AT2G39700	ID=AT2G39700;Name=AT2G39700;Note=expansin A4;curator_summary=putative expansin. Naming convention from the Expansin Working Group (Kende et al%2C 2004. Plant Mol Bio). Involved in the formation of nematode-induced syncytia in roots of Arabidopsis thaliana.;symbol=EXPA4;Alias=ATEXP4,ATEXPA4,expansin A4,ATHEXP ALPHA 1.6;full_name=expansin A4;computational_description=expansin A4 (EXPA4)%3B CONTAINS…
OG0012977	0	0	0	0	Fbias	0	0	0	0	Mbias	2	0	NA	divergent_gains	AT5G63180	ID=AT5G63180;Name=AT5G63180;Note=Pectin lyase-like superfamily protein;computational_description=Pectin lyase-like superfamily protein%3B CONTAINS InterPro DOMAIN/s: Pectin lyase fold/virulence factor (InterPro:IPR011050)%2C AmbAllergen (InterPro:IPR018082)%2C Pectate lyase/Amb allergen (InterPro:IPR002022)%2C Pectin lyase fold (InterPro:IPR012334)%2C Parallel beta-helix repeat (InterPro:IPR00662…
OG0002515	0	0	0	0	Fbias	0	0	0	0	Mbias	2	0	NA	divergent_gains	AT4G13710	ID=AT4G13710;Name=AT4G13710;Note=Pectin lyase-like superfamily protein;computational_description=Pectin lyase-like superfamily protein%3B FUNCTIONS IN: lyase activity%2C pectate lyase activity%3B INVOLVED IN: biological_process unknown%3B LOCATED IN: endomembrane system%3B EXPRESSED IN: 20 plant structures%3B EXPRESSED DURING: 6 growth stages%3B CONTAINS InterPro DOMAIN/s: Pectin lyase fold/virul…
OG0002865	0	0	0	0	0	Fbias	0	0	0	Mbias	2	0	NA	divergent_gains
OG0010046	0	Fbias	0	0	0	Mbias	0	0	0	0	2	0	NA	divergent_gains	AT3G10340	ID=AT3G10340;Name=AT3G10340;Note=phenylalanine ammonia-lyase 4;curator_summary=Encodes PAL4%2C a putative a phenylalanine ammonia-lyase. Arabidopsis has four PALs: AT2G37040 (PAL1)%2C AT3G53260 (PAL2)%2C AT5G04230 (PAL3) and AT3G10340 (PAL4).;symbol=PAL4;full_name=phenylalanine ammonia-lyase 4;computational_description=phenylalanine ammonia-lyase 4 (PAL4)%3B FUNCTIONS IN: ammonia-lyase activity%2…
OG0011588	0	Fbias	0	0	0	Mbias	0	0	0	0	2	0	NA	divergent_gains	AT5G13930	ID=AT5G13930;Name=AT5G13930;Note=Chalcone and stilbene synthase family protein;curator_summary=Encodes chalcone synthase (CHS)%2C a key enzyme involved in the biosynthesis of flavonoids. Required for the accumulation of purple anthocyanins in leaves and stems. Also involved in the regulation of auxin transport and the modulation of root gravitropism.;symbol=TT4;Alias=ATCHS,CHS,CHALCONE SYNTHASE;f…
OG0000356	0	Fbias	0	0	0	Mbias	0	0	0	0	2	0	NA	divergent_gains	AT1G80760	ID=AT1G80760;Name=AT1G80760;Note=NOD26-like intrinsic protein 6%3B1;curator_summary=Encodes a protein with boron transporter activity. It helps to preferentially direct boron to young developing tissues in the shoot%2C such as immature leaves%2C under low boron conditions. This boron channel appears to be impermeable to water%2C unlike the closely related NIP5%3B1 boron transporter. This protein …
OG0001527	0	Fbias	0	0	0	Mbias	0	0	0	0	2	0	NA	divergent_gains	AT3G51240	ID=AT3G51240;Name=AT3G51240;Note=flavanone 3-hydroxylase;curator_summary=Encodes flavanone 3-hydroxylase that is coordinately expressed with chalcone synthase and chalcone isomerases. Regulates flavonoid biosynthesis. Not responsive to auxin or ethylene stimulus (qRT-PCR).;symbol=F3H;Alias=F3'H,TT6,TRANSPARENT TESTA 6;full_name=flavanone 3-hydroxylase;computational_description=flavanone 3-hydroxy…
OG0001182	0	Fbias	0	0	0	Mbias	0	0	0	0	2	0	NA	divergent_gains	AT5G13930	ID=AT5G13930;Name=AT5G13930;Note=Chalcone and stilbene synthase family protein;curator_summary=Encodes chalcone synthase (CHS)%2C a key enzyme involved in the biosynthesis of flavonoids. Required for the accumulation of purple anthocyanins in leaves and stems. Also involved in the regulation of auxin transport and the modulation of root gravitropism.;symbol=TT4;Alias=ATCHS,CHS,CHALCONE SYNTHASE;f…
OG0000452	0	Fbias	0	0	0	Mbias	0	0	0	0	2	0	NA	divergent_gains	AT5G13930	ID=AT5G13930;Name=AT5G13930;Note=Chalcone and stilbene synthase family protein;curator_summary=Encodes chalcone synthase (CHS)%2C a key enzyme involved in the biosynthesis of flavonoids. Required for the accumulation of purple anthocyanins in leaves and stems. Also involved in the regulation of auxin transport and the modulation of root gravitropism.;symbol=TT4;Alias=ATCHS,CHS,CHALCONE SYNTHASE;f…
OG0002006	0	0	Fbias	0	0	Mbias	0	0	0	0	2	0	NA	divergent_gains	AT4G39410	ID=AT4G39410;Name=AT4G39410;Note=WRKY DNA-binding protein 13;curator_summary=member of WRKY Transcription Factor%3B Group II-c;symbol=WRKY13;Alias=ATWRKY13,ARABIDOPSIS THALIANA WRKY DNA-BINDING PROTEIN 13;full_name=WRKY DNA-binding protein 13;computational_description=WRKY DNA-binding protein 13 (WRKY13)%3B FUNCTIONS IN: sequence-specific DNA binding transcription factor activity%3B INVOLVED IN: …
OG0008154	0	0	0	0	Fbias	Mbias	0	0	0	0	2	0	NA	divergent_gains
OG0010535	0	0	0	0	Fbias	Mbias	0	0	0	0	2	0	NA	divergent_gains	AT3G53400	ID=AT3G53400;Name=AT3G53400;Note=peptide upstream protein;computational_description=BEST Arabidopsis thaliana protein match is: conserved peptide upstream open reading frame 47 (TAIR:AT5G03190.1)%3B Has 285 Blast hits to 285 proteins in 23 species: Archae - 0%3B Bacteria - 0%3B Metazoa - 1%3B Fungi - 0%3B Plants - 279%3B Viruses - 0%3B Other Eukaryotes - 5 (source: NCBI BLink).;Dbxref=PMID:129490…
OG0002475	0	0	0	0	Fbias	Mbias	0	0	0	0	2	0	NA	divergent_gains	AT4G37540	ID=AT4G37540;Name=AT4G37540;Note=LOB domain-containing protein 39;symbol=LBD39;full_name=LOB domain-containing protein 39;computational_description=LOB domain-containing protein 39 (LBD39)%3B CONTAINS InterPro DOMAIN/s: Lateral organ boundaries%2C LOB (InterPro:IPR004883)%3B BEST Arabidopsis thaliana protein match is: LOB domain-containing protein 38 (TAIR:AT3G49940.1)%3B Has 571 Blast hits to 57…
OG0009646	Mbias	Fbias	0	0	0	0	0	0	0	0	2	0	NA	divergent_gains	AT3G59030	ID=AT3G59030;Name=AT3G59030;Note=MATE efflux family protein;curator_summary=Encodes a proton antiporter. Involved in the transportation of proanthocyanidin precursors into the vacuole. In vitro transport experiments showed that cyanidin-3-O-glucoside (anthocyanin) was an effective substrate%2C whereas the proanthocyanidin precursor epicatechin was not transported. However catechin-3-O-glucoside i…
OG0004467	Mbias	0	0	0	Fbias	0	0	0	0	0	2	0	NA	divergent_gains	AT3G08030	ID=AT3G08030;Name=AT3G08030;Note=DNA-directed RNA polymerase subunit beta (Protein of unknown function%2C DUF642);curator_summary=The mRNA of this gene is expressed in viable seeds. Its detection in a dry seed lot has potential for use as a molecular marker for germination performance as absence of expression correlates with decreased germination.;computational_description=Protein of unknown func…
OG0010324	0	0	0	0	Mbias	Fbias	0	0	0	0	2	0	NA	divergent_gains	AT5G02070	ID=AT5G02070;Name=AT5G02070;Note=Protein kinase family protein;computational_description=Protein kinase family protein%3B FUNCTIONS IN: kinase activity%3B INVOLVED IN: protein amino acid phosphorylation%3B CONTAINS InterPro DOMAIN/s: Protein kinase%2C ATP binding site (InterPro:IPR017441)%2C Protein kinase%2C catalytic domain (InterPro:IPR000719)%2C Serine/threonine-protein kinase-like domain (In…
OG0000115	0	0	Mbias	0	0	Fbias	0	0	0	0	2	0	NA	divergent_gains	AT1G67090	ID=AT1G67090;Name=AT1G67090;Note=ribulose bisphosphate carboxylase small chain 1A;curator_summary=Encodes a member of the Rubisco small subunit (RBCS) multigene family: RBCS1A (At1g67090)%2C RBCS1B (At5g38430)%2C RBCS2B (At5g38420)%2C and RBCS3B (At5g38410). Functions to yield sufficient Rubisco content for leaf photosynthetic capacity.;symbol=RBCS1A;full_name=ribulose bisphosphate carboxylase sm…
OG0004483	0	Mbias	0	0	0	Fbias	0	0	0	0	2	0	NA	divergent_gains
OG0011230	0	Mbias	0	0	0	Fbias	0	0	0	0	2	0	NA	divergent_gains
OG0003953	0	0	0	Mbias	0	0	Fbias	0	0	0	2	0	NA	divergent_gains	AT2G29420	ID=AT2G29420;Name=AT2G29420;Note=glutathione S-transferase tau 7;curator_summary=Encodes glutathione transferase belonging to the tau class of GSTs. Naming convention according to Wagner et al. (2002). Induced by Salicylic acid. Independent of NPR1 for their induction by salicylic acid.;symbol=GSTU7;Alias=ATGSTU7,glutathione S-transferase tau 7,GST25,GLUTATHIONE S-TRANSFERASE 25;full_name=glutath…
OG0002925	Mbias	0	0	0	0	0	0	0	0	Fbias	2	0	NA	divergent_gains	AT2G46410	ID=AT2G46410;Name=AT2G46410;Note=Homeodomain-like superfamily protein;curator_summary=Nuclear-localized R3-type MYB transcription factor. Positive regulator of hair-cell differentiation. Preferentially transcribed in hairless cells. Moves from atrichoblasts into trichoblast via plasmodesmata in a tissue-specific mode. N-terminus and part of the Myb domain are required for this movement%2C with W7…
OG0001906	Fbias	0	0	Mbias	0	0	0	Mbias	0	0	3	0	NA	divergent_gains	AT4G35190	ID=AT4G35190;Name=AT4G35190;Note=Putative lysine decarboxylase family protein;symbol=LOG5;full_name=LONELY GUY 5;computational_description=Putative lysine decarboxylase family protein%3B CONTAINS InterPro DOMAIN/s: Conserved hypothetical protein CHP00730 (InterPro:IPR005269)%3B BEST Arabidopsis thaliana protein match is: lysine decarboxylase family protein (TAIR:AT2G37210.1)%3B Has 30201 Blast hi…
OG0000569	Mbias	Fbias	0	0	0	0	Mbias	0	0	0	3	0	NA	divergent_gains	AT1G62660	ID=AT1G62660;Name=AT1G62660;Note=Glycosyl hydrolases family 32 protein;computational_description=Glycosyl hydrolases family 32 protein%3B FUNCTIONS IN: hydrolase activity%2C hydrolyzing O-glycosyl compounds%3B INVOLVED IN: sucrose catabolic process%2C using beta-fructofuranosidase%2C carbohydrate metabolic process%3B LOCATED IN: vacuole%3B EXPRESSED IN: 23 plant structures%3B EXPRESSED DURING: 12…
OG0009936	Mbias	Fbias	0	0	0	Mbias	0	0	0	0	3	0	NA	divergent_gains	AT4G22880	ID=AT4G22880;Name=AT4G22880;Note=leucoanthocyanidin dioxygenase;curator_summary=encodes leucoanthocyanidin dioxygenase%2C which is involved in proanthocyanin biosynthesis. Mutant analysis suggests that this gene is also involved in vacuole formation.;symbol=LDOX;Alias=ANS,ANTHOCYANIDIN SYNTHASE,TDS4,TANNIN DEFICIENT SEED 4,TT18;full_name=leucoanthocyanidin dioxygenase;computational_description=le…
OG0001123	Mbias	Fbias	0	0	0	Mbias	0	0	0	0	3	0	NA	divergent_gains	AT1G08250	ID=AT1G08250;Name=AT1G08250;Note=arogenate dehydratase 6;curator_summary=Encodes a plastid-localized arogenate dehydratase involved in phenylalanine biosynthesis. Although this enzyme has sequence similarity to prephenate dehydratases%2C it is 98 times more active with arogenate than prephenate in enzymatic assays.;symbol=ADT6;Alias=AtADT6,Arabidopsis thaliana arogenate dehydratase 6;full_name=ar…
OG0004450	Mbias	Fbias	0	0	0	Mbias	0	0	0	0	3	0	NA	divergent_gains	AT1G61720	ID=AT1G61720;Name=AT1G61720;Note=NAD(P)-binding Rossmann-fold superfamily protein;curator_summary=Negative regulator of flavonoid biosynthesis%2C mutants accumulate flavonoid pigments in their seed coat%2C putative oxidoreductase. It is thought that a ternary complex composed of TT2%2C TT8 and TTG1 is necessary for correct expression of BAN in seed endothelium.;symbol=BAN;full_name=BANYULS;comput…
OG0001220	Mbias	0	0	0	0	Mbias	0	0	Fbias	0	3	0	NA	divergent_gains	AT5G42800	ID=AT5G42800;Name=AT5G42800;Note=dihydroflavonol 4-reductase;curator_summary=dihydroflavonol reductase. Catalyzes the conversion of dihydroquercetin to leucocyanidin in the biosynthesis of anthocyanins. Not expressed in roots (qRT-PCR).;symbol=DFR;Alias=M318,TT3;full_name=dihydroflavonol 4-reductase;computational_description=dihydroflavonol 4-reductase (DFR)%3B CONTAINS InterPro DOMAIN/s: NAD-dep…
OG0004934	Fbias	0	0	0	0	Fbias	0	0	0	0	2	0	NA	repeatedly_unbiased_to_Fbias	AT5G02020	ID=AT5G02020;Name=AT5G02020;Note=E3 ubiquitin-protein ligase RLIM-like protein;curator_summary=Encodes a protein involved in salt tolerance%2C names SIS (Salt Induced Serine rich).;symbol=SIS;full_name=Salt Induced Serine rich;computational_description=unknown protein%3B FUNCTIONS IN: molecular_function unknown%3B INVOLVED IN: biological_process unknown%3B LOCATED IN: chloroplast%3B EXPRESSED IN:…
OG0000850	Fbias	0	0	0	0	Fbias	0	0	0	0	2	0	NA	repeatedly_unbiased_to_Fbias	AT2G15480	ID=AT2G15480;Name=AT2G15480;Note=UDP-glucosyl transferase 73B5;symbol=UGT73B5;full_name=UDP-glucosyl transferase 73B5;computational_description=UDP-glucosyl transferase 73B5 (UGT73B5)%3B FUNCTIONS IN: quercetin 3-O-glucosyltransferase activity%2C UDP-glycosyltransferase activity%2C UDP-glucosyltransferase activity%2C transferase activity%2C transferring glycosyl groups%3B INVOLVED IN: response to…
OG0011873	Fbias	0	0	0	0	Fbias	0	0	0	0	2	0	NA	repeatedly_unbiased_to_Fbias	AT5G62360	ID=AT5G62360;Name=AT5G62360;Note=Plant invertase/pectin methylesterase inhibitor superfamily protein;computational_description=Plant invertase/pectin methylesterase inhibitor superfamily protein%3B FUNCTIONS IN: enzyme inhibitor activity%2C pectinesterase inhibitor activity%2C pectinesterase activity%3B INVOLVED IN: biological_process unknown%3B LOCATED IN: cellular_component unknown%3B EXPRESSED…
OG0003331	Fbias	0	0	0	0	Fbias	0	0	0	0	2	0	NA	repeatedly_unbiased_to_Fbias	AT2G38090	ID=AT2G38090;Name=AT2G38090;Note=Duplicated homeodomain-like superfamily protein;computational_description=Duplicated homeodomain-like superfamily protein%3B CONTAINS InterPro DOMAIN/s: Molecular chaperone%2C heat shock protein%2C Hsp40%2C DnaJ (InterPro:IPR015609)%2C SANT%2C eukarya (InterPro:IPR017884)%2C Myb-like DNA-binding domain%2C SHAQKYF class (InterPro:IPR006447)%2C SANT%2C DNA-binding (…
OG0002477	Fbias	0	0	0	0	Fbias	0	0	0	0	2	0	NA	repeatedly_unbiased_to_Fbias	AT4G17090	ID=AT4G17090;Name=AT4G17090;Note=chloroplast beta-amylase;curator_summary=Encodes a beta-amylase targeted to the chloroplast. Transgenic BMY8 RNAi lines fail to accumulate maltose during cold shock suggesting that maltose accumulation coincides with BMY8 expression. Apart from maltose%2C the sugar content of the RNAi lines were similar to wildtype (glucose and sucrose unaffected).;symbol=CT-BMY;A…
OG0003820	Fbias	0	0	0	0	Fbias	0	0	0	0	2	0	NA	repeatedly_unbiased_to_Fbias	AT5G50740	ID=AT5G50740;Name=AT5G50740;Note=Heavy metal transport/detoxification superfamily protein;computational_description=Heavy metal transport/detoxification superfamily protein %3B FUNCTIONS IN: metal ion binding%3B INVOLVED IN: metal ion transport%3B LOCATED IN: cellular_component unknown%3B EXPRESSED IN: 20 plant structures%3B EXPRESSED DURING: 13 growth stages%3B CONTAINS InterPro DOMAIN/s: Heavy …
OG0003969	Fbias	0	0	0	0	Fbias	0	0	0	0	2	0	NA	repeatedly_unbiased_to_Fbias	AT1G02640	ID=AT1G02640;Name=AT1G02640;Note=beta-xylosidase 2;curator_summary=encodes a protein similar to a beta-xylosidase located in the extracellular matrix. This is a member of glycosyl hydrolase family 3 and has six other closely related members.;symbol=BXL2;Alias=ATBXL2,BETA-XYLOSIDASE 2;full_name=beta-xylosidase 2;computational_description=beta-xylosidase 2 (BXL2)%3B FUNCTIONS IN: hydrolase activity…
OG0011035	Fbias	0	0	0	0	Fbias	0	0	0	0	2	0	NA	repeatedly_unbiased_to_Fbias	AT4G18830	ID=AT4G18830;Name=AT4G18830;Note=ovate family protein 5;curator_summary=Member of the ovate protein family.Interacts with BLH1 and KNAT3. Regulates the subcellular localization of BLH1.;symbol=OFP5;Alias=ATOFP5;full_name=ovate family protein 5;computational_description=ovate family protein 5 (OFP5)%3B CONTAINS InterPro DOMAIN/s: Protein of unknown function DUF623 (InterPro:IPR006458)%3B BEST Arab…
OG0005187	Fbias	0	0	0	0	Fbias	0	0	0	0	2	0	NA	repeatedly_unbiased_to_Fbias	AT2G47880	ID=AT2G47880;Name=AT2G47880;Note=Glutaredoxin family protein;computational_description=Glutaredoxin family protein%3B FUNCTIONS IN: electron carrier activity%2C arsenate reductase (glutaredoxin) activity%2C protein disulfide oxidoreductase activity%3B INVOLVED IN: cell redox homeostasis%3B LOCATED IN: endomembrane system%3B EXPRESSED IN: 11 plant structures%3B EXPRESSED DURING: 7 growth stages%3B…
OG0010105	0	0	0	0	Fbias	0	Fbias	0	0	0	2	0	NA	repeatedly_unbiased_to_Fbias	AT1G15380	ID=AT1G15380;Name=AT1G15380;Note=Lactoylglutathione lyase / glyoxalase I family protein;symbol=GLYI4;full_name=glyoxylase I 4;computational_description=Lactoylglutathione lyase / glyoxalase I family protein%3B CONTAINS InterPro DOMAIN/s: Glyoxalase/bleomycin resistance protein/dioxygenase (InterPro:IPR004360)%3B BEST Arabidopsis thaliana protein match is: Lactoylglutathione lyase / glyoxalase I f…
OG0009162	0	0	0	0	Fbias	0	Fbias	0	0	0	2	0	NA	repeatedly_unbiased_to_Fbias	AT4G35750	ID=AT4G35750;Name=AT4G35750;Note=SEC14 cytosolic factor family protein / phosphoglyceride transfer family protein;computational_description=SEC14 cytosolic factor family protein / phosphoglyceride transfer family protein%3B CONTAINS InterPro DOMAIN/s: Cellular retinaldehyde-binding/triple function%2C C-terminal (InterPro:IPR001251)%3B BEST Arabidopsis thaliana protein match is: SEC14 cytosolic fa…
OG0002228	0	0	0	0	0	Fbias	Fbias	0	0	0	2	0	NA	repeatedly_unbiased_to_Fbias	AT5G20150	ID=AT5G20150;Name=AT5G20150;Note=SPX domain-containing protein 1;curator_summary=Expression is upregulated in the shoot of cax1/cax3 mutant. Additionally%2C its expression is responsive to both phosphate (Pi) and phosphite (Phi) in both roots and shoots.;symbol=SPX1;Alias=ATSPX1,ARABIDOPSIS THALIANA SPX DOMAIN GENE 1;full_name=SPX domain gene 1;computational_description=SPX domain gene 1 (SPX1)%3…
OG0012041	0	0	0	0	0	Fbias	Fbias	0	0	0	2	0	NA	repeatedly_unbiased_to_Fbias	AT4G24700	ID=AT4G24700;Name=AT4G24700;Note=hypothetical protein;computational_description=unknown protein%3B Has 20 Blast hits to 20 proteins in 7 species: Archae - 0%3B Bacteria - 0%3B Metazoa - 0%3B Fungi - 0%3B Plants - 20%3B Viruses - 0%3B Other Eukaryotes - 0 (source: NCBI BLink).;Dbxref=PMID:18650403,PMID:18989364,locus:2121919;locus_type=protein_coding
OG0000002	0	0	0	0	0	Fbias	Fbias	0	0	0	2	0	NA	repeatedly_unbiased_to_Fbias	AT3G15353	ID=AT3G15353;Name=AT3G15353;Note=metallothionein 3;curator_summary=metallothionein%2C binds to and detoxifies excess copper and other metals%2C limiting oxidative damage;symbol=MT3;Alias=ATMT3;full_name=metallothionein 3;computational_description=metallothionein 3 (MT3)%3B Has 268 Blast hits to 268 proteins in 64 species: Archae - 0%3B Bacteria - 0%3B Metazoa - 0%3B Fungi - 0%3B Plants - 268%3B V…
OG0000034	0	0	0	0	0	Fbias	Fbias	0	0	0	2	0	NA	repeatedly_unbiased_to_Fbias	AT1G22380	ID=AT1G22380;Name=AT1G22380;Note=UDP-glucosyl transferase 85A3;curator_summary=Encodes a putative UDP-glucosyl transferase. At1g22380 was initially identified as encoding the protein AAF87154%2C which has been classified as a bHLH protein (AtbHLH152). Subsequently it has been found that the AAF87154 protein appears to be encoded by the AT1G23970 genomic locus.;symbol=UGT85A3;Alias=AtUGT85A3,UDP-g…
OG0011947	0	0	0	0	0	Fbias	Fbias	0	0	0	2	0	NA	repeatedly_unbiased_to_Fbias	ATMG00980	ID=ATMG00980;Note=Ribosomal protein S12/S23 family protein;Name=ATMG00980;curator_summary=ribosomal protein L2;symbol=RPSL2;computational_description=RPSL2%3B FUNCTIONS IN: structural constituent of ribosome%3B INVOLVED IN: translation%3B LOCATED IN: mitochondrial large ribosomal subunit%3B CONTAINS InterPro DOMAIN/s: Ribosomal protein S12/S23 (InterPro:IPR006032)%2C Nucleic acid-binding%2C OB-fo…
OG0001416	0	0	0	0	0	0	Fbias	0	0	Fbias	2	0	NA	repeatedly_unbiased_to_Fbias	AT3G55240	ID=AT3G55240;Name=AT3G55240;Note=Plant protein 1589 of unknown function;curator_summary=Overexpression leads to PEL (Pseudo-Etiolation in Light) phenotype.;computational_description=FUNCTIONS IN: molecular_function unknown%3B INVOLVED IN: developmental process%3B LOCATED IN: endomembrane system%3B CONTAINS InterPro DOMAIN/s: Conserved hypothetical protein CHP01589%2C plant (InterPro:IPR006476)%3B…
OG0010406	Fbias	0	0	0	0	Fbias	Fbias	0	0	0	4	1	NA	repeatedly_unbiased_to_Fbias	ATMG00513	ID=ATMG00513;Note=NADH dehydrogenase 5A;Name=ATMG00513;curator_summary=Mitochondrial NADH dehydrogenase subunit 5. The gene is trans-spliced from three different pre-cursors%2C NAD5a%2C NAD5b and NAD5c.;symbol=NAD5A;Alias=NAD5.1,NADH DEHYDROGENASE 5.1,NAD5,NADH DEHYDROGENASE SUBUNIT 5;full_name=NADH dehydrogenase 5A;computational_description=NADH dehydrogenase 5A (NAD5A)%3B CONTAINS InterPro DOMA…
OG0000761	0	0	Fbias	0	Fbias	Fbias	Fbias	0	0	0	4	1	NA	repeatedly_unbiased_to_Fbias	AT2G45130	ID=AT2G45130;Name=AT2G45130;Note=SPX domain protein 3;curator_summary=Expression is upregulated in the shoot of cax1/cax3 mutant.;symbol=SPX3;Alias=ATSPX3,ARABIDOPSIS THALIANA SPX DOMAIN GENE 3;full_name=SPX domain gene 3;computational_description=SPX domain gene 3 (SPX3)%3B CONTAINS InterPro DOMAIN/s: SPX%2C N-terminal (InterPro:IPR004331)%3B BEST Arabidopsis thaliana protein match is: SPX domai…
OG0001072	0	0	0	0	0	0	0	Mbias	Mbias	0	2	0	NA	repeatedly_unbiased_to_Mbias	AT2G41370	ID=AT2G41370;Name=AT2G41370;Note=Ankyrin repeat family protein / BTB/POZ domain-containing protein;curator_summary=Encodes BOP2%2C a cytoplasmic and nuclear-localized NPR1 like protein with BTB/POZ domain and ankyrin repeats. Interacts with BOP1 and appears to be genetically redundant with BOP1.bop1/bop2 double mutants have longer leaves%2C often with leaflets on the petiole%2C asymmetric flowers…
OG0000461	0	0	0	0	0	Mbias	0	0	Mbias	0	2	0	NA	repeatedly_unbiased_to_Mbias	ATMG00513	ID=ATMG00513;Note=NADH dehydrogenase 5A;Name=ATMG00513;curator_summary=Mitochondrial NADH dehydrogenase subunit 5. The gene is trans-spliced from three different pre-cursors%2C NAD5a%2C NAD5b and NAD5c.;symbol=NAD5A;Alias=NAD5.1,NADH DEHYDROGENASE 5.1,NAD5,NADH DEHYDROGENASE SUBUNIT 5;full_name=NADH dehydrogenase 5A;computational_description=NADH dehydrogenase 5A (NAD5A)%3B CONTAINS InterPro DOMA…
OG0000177	0	Mbias	0	0	0	Mbias	0	0	0	0	2	0	NA	repeatedly_unbiased_to_Mbias	AT2G32060	ID=AT2G32060;Name=AT2G32060;Note=Ribosomal protein L7Ae/L30e/S12e/Gadd45 family protein;computational_description=Ribosomal protein L7Ae/L30e/S12e/Gadd45 family protein%3B FUNCTIONS IN: structural constituent of ribosome%3B INVOLVED IN: translation%3B LOCATED IN: cytosolic small ribosomal subunit%2C cytosolic ribosome%2C nucleus%3B EXPRESSED IN: 22 plant structures%3B EXPRESSED DURING: 13 growth …
OG0004961	Mbias	0	0	0	0	Mbias	0	0	0	0	2	0	NA	repeatedly_unbiased_to_Mbias	AT5G28060	ID=AT5G28060;Name=AT5G28060;Note=Ribosomal protein S24e family protein;computational_description=Ribosomal protein S24e family protein%3B FUNCTIONS IN: structural constituent of ribosome%2C nucleotide binding%3B INVOLVED IN: translation%2C ribosome biogenesis%3B LOCATED IN: cytosolic small ribosomal subunit%2C cytosolic ribosome%2C ribosome%2C cell wall%2C membrane%3B EXPRESSED IN: 23 plant struc…
OG0002948	Mbias	0	0	0	0	Mbias	0	0	0	0	2	0	NA	repeatedly_unbiased_to_Mbias	AT3G22810	ID=AT3G22810;Name=AT3G22810;Note=auxin canalization protein (DUF828);computational_description=FUNCTIONS IN: phosphoinositide binding%3B INVOLVED IN: signal transduction%3B LOCATED IN: cellular_component unknown%3B EXPRESSED IN: 10 plant structures%3B EXPRESSED DURING: 4 anthesis%2C F mature embryo stage%2C petal differentiation and expansion stage%2C E expanded cotyledon stage%2C D bilateral sta…
OG0010193	Mbias	0	0	0	0	Mbias	0	0	0	0	2	0	NA	repeatedly_unbiased_to_Mbias	AT5G49330	ID=AT5G49330;Name=AT5G49330;Note=myb domain protein 111;curator_summary=Member of the R2R3 factor gene family.;symbol=MYB111;Alias=ATMYB111,ARABIDOPSIS MYB DOMAIN PROTEIN 111,PFG3,PRODUCTION OF FLAVONOL GLYCOSIDES 3;full_name=myb domain protein 111;computational_description=myb domain protein 111 (MYB111)%3B CONTAINS InterPro DOMAIN/s: SANT%2C DNA-binding (InterPro:IPR001005)%2C Homeodomain-like …
OG0010810	0	0	0	Mbias	0	Mbias	0	0	0	0	2	0	NA	repeatedly_unbiased_to_Mbias	AT3G03430	ID=AT3G03430;Name=AT3G03430;Note=Calcium-binding EF-hand family protein;computational_description=Calcium-binding EF-hand family protein%3B FUNCTIONS IN: calcium ion binding%3B INVOLVED IN: biological_process unknown%3B LOCATED IN: cytoplasm%3B EXPRESSED IN: 9 plant structures%3B EXPRESSED DURING: L mature pollen stage%2C M germinated pollen stage%2C 4 anthesis%2C C globular stage%2C petal differ…
OG0001531	0	0	0	Mbias	0	Mbias	0	0	0	0	2	0	NA	repeatedly_unbiased_to_Mbias	AT1G17020	ID=AT1G17020;Name=AT1G17020;Note=senescence-related gene 1;curator_summary=Encodes a novel member of the Fe(II)/ascorbate oxidase gene family%3B senescence-related gene.;symbol=SRG1;Alias=ATSRG1,SENESCENCE-RELATED GENE 1;full_name=senescence-related gene 1;computational_description=senescence-related gene 1 (SRG1)%3B CONTAINS InterPro DOMAIN/s: Oxoglutarate/iron-dependent oxygenase (InterPro:IPR0…
OG0011857	0	0	0	Mbias	0	Mbias	0	0	0	0	2	0	NA	repeatedly_unbiased_to_Mbias	AT2G32210	ID=AT2G32210;Name=AT2G32210;Note=cysteine-rich/transmembrane domain A-like protein;computational_description=unknown protein%3B BEST Arabidopsis thaliana protein match is: unknown protein (TAIR:AT2G32190.1)%3B Has 214 Blast hits to 214 proteins in 21 species: Archae - 0%3B Bacteria - 0%3B Metazoa - 1%3B Fungi - 10%3B Plants - 203%3B Viruses - 0%3B Other Eukaryotes - 0 (source: NCBI BLink).;Dbxref…
OG0011131	0	0	0	Mbias	0	Mbias	0	0	0	0	2	0	NA	repeatedly_unbiased_to_Mbias	AT2G18370	ID=AT2G18370;Name=AT2G18370;Note=Bifunctional inhibitor/lipid-transfer protein/seed storage 2S albumin superfamily protein;curator_summary=Predicted to encode a PR (pathogenesis-related) protein. Belongs to the lipid transfer protein (PR-14) family with the following members: At2g38540/LTP1%2C At2g38530/LTP2%2C At5g59320/LTP3%2C At5g59310/LTP4%2C At3g51600/LTP5%2C At3g08770/LTP6%2C At2g15050/LTP7…
OG0001443	0	Mbias	0	Mbias	0	0	0	0	0	0	2	0	NA	repeatedly_unbiased_to_Mbias	AT1G69490	ID=AT1G69490;Name=AT1G69490;Note=NAC-like%2C activated by AP3/PI;curator_summary=Encodes a member of the NAC transcription factor gene family. It is expressed in floral primordia and upregulated by AP3 and PI. Its expression is associated with leaf senescence.;symbol=NAP;Alias=ANAC029,Arabidopsis NAC domain containing protein 29,ATNAP,NAC-LIKE, ACTIVATED BY AP3/PI;full_name=NAC-like%2C activated …
OG0000329	Mbias	0	0	Mbias	0	0	0	0	0	0	2	0	NA	repeatedly_unbiased_to_Mbias	AT1G17840	ID=AT1G17840;Name=AT1G17840;Note=white-brown complex-like protein;curator_summary=Encodes a plasma membrane-localized ATP-binding cassette transporter%2C that is required for cutin transport to the extracellular matrix.;symbol=ABCG11;Alias=ATWBC11,ARABIDOPSIS THALIANA WHITE-BROWN COMPLEX HOMOLOG PROTEIN 11,AtABCG11,COF1,CUTICULAR DEFECT AND ORGAN FUSION 1,DSO,DESPERADO,WBC11,white-brown complex h…
OG0009248	0	0	0	0	Fbias	Fbias	0	0	0	0	1	0	ancestral_gain	unbiased_to_female_biased	AT2G39730	ID=AT2G39730;Name=AT2G39730;Note=rubisco activase;curator_summary=Rubisco activase%2C a nuclear-encoded chloroplast protein that consists of two isoforms arising from alternative splicing in most plants. Required for the light activation of rubisco. Involved in jasmonate-induced leaf senescence.;symbol=RCA;full_name=rubisco activase;computational_description=rubisco activase (RCA)%3B FUNCTIONS IN…
OG0009712	0	0	0	0	0	0	Mbias	Mbias	0	0	1	0	ancestral_gain	unbiased_to_male_biased	AT5G05690	ID=AT5G05690;Name=AT5G05690;Note=Cytochrome P450 superfamily protein;curator_summary=Encodes a member of the CP90A family%2C a cytochrome P450 monooxygenase which converts 6-deoxocathasterone to 6-deoxoteasterone in the late C6 oxidation pathway and cathasterone to teasterone in the early C6 oxidation pathway of brassinolide biosynthesis. Expressed in cotyledons and leaves. Mutants display de-eti…
OG0006105	0	0	0	0	Mbias	Mbias	0	0	0	0	1	0	ancestral_gain	unbiased_to_male_biased	AT5G07050	ID=AT5G07050;Name=AT5G07050;Note=nodulin MtN21 /EamA-like transporter family protein;curator_summary=nodulin MtN21-like transporter family protein;symbol=UMAMIT9;full_name=Usually multiple acids move in and out Transporters 9;computational_description=nodulin MtN21 /EamA-like transporter family protein%3B LOCATED IN: membrane%3B CONTAINS InterPro DOMAIN/s: Protein of unknown function DUF6%2C tran…
OG0010839	Mbias	Mbias	0	0	0	0	0	0	0	0	1	0	ancestral_gain	unbiased_to_male_biased	AT5G26220	ID=AT5G26220;Name=AT5G26220;Note=ChaC-like family protein;Alias=AtGGCT2%3B1,GGCT2%3B1,gamma-glutamyl cyclotransferase 2%3B1;computational_description=ChaC-like family protein%3B CONTAINS InterPro DOMAIN/s: ChaC-like protein (InterPro:IPR006840)%3B BEST Arabidopsis thaliana protein match is: ChaC-like family protein (TAIR:AT4G31290.1)%3B Has 1807 Blast hits to 1807 proteins in 277 species: Archae …

## Sheet: Table_S5
Table S5. Functional annotations and annotation clusters using the default annotations at medium stringency in the DAVID database for male-biased genes in Leucadendron.
Annotation Cluster 1	Enrichment Score: 5.908803370706347
Category	Term	Count	%	PValue	Genes	List Total	Pop Hits	Pop Total	Fold Enrichment	Bonferroni	Benjamini	FDR
UP_KEYWORDS	Flavonoid biosynthesis	9	3.46154	5.66677e-10	AT5G13930, AT3G51240, AT5G05270, AT5G35550, AT5G07990, AT3G59030, AT5G42800, AT1G61720, AT4G22880	258	14	9708	24.1894	1.08235e-07	1.08235e-07	1.02002e-07
KEGG_PATHWAY	ath00941:Flavonoid biosynthesis	6	2.30769	4.86922e-05	AT5G13930, AT3G51240, AT5G07990, AT5G42800, AT1G61720, AT4G22880	79	14	2421	13.1338	0.00267455	0.00133904	0.00131469
GOTERM_BP_DIRECT	GO:0009813~flavonoid biosynthetic process	9	3.46154	6.80448e-05	AT5G13930, AT3G51240, AT5G17050, AT5G05270, AT5G35550, AT5G07990, AT1G17020, AT3G59030, AT1G61720	222	47	7338	6.3295	0.0253275	0.0229354	0.0228746
Annotation Cluster 2	Enrichment Score: 5.458942498473977
Category	Term	Count	%	PValue	Genes	List Total	Pop Hits	Pop Total	Fold Enrichment	Bonferroni	Benjamini	FDR
GOTERM_CC_DIRECT	GO:0005576~extracellular region	45	17.3077	5.96144e-11	AT5G22860, AT1G11580, AT2G39700, AT1G60590, AT5G25610, AT3G53400, AT1G09560, AT1G33470, AT1G05260, AT4G21960, AT5G08260, AT1G70710, AT2G17230, AT5G10695, AT3G20015, AT2G18370, AT1G49570, AT3G45970, AT1G73620, AT1G29980, AT4G13710, AT1G09850, AT4G17030, AT1G76130, AT5G05960, AT1G02460, AT2G28100, AT5G63180, AT5G66390, AT4G25810, AT5G49830, AT1G70520, AT5G06390, AT5G24090, AT2G37870, AT1G66180, AT3…	251	564	9440	3.00076	4.948e-09	4.948e-09	4.70954e-09
UP_KEYWORDS	Signal	52	20	2.6157e-09	AT1G11580, AT5G46330, AT1G05260, AT2G36570, AT5G08260, AT1G70710, AT4G24450, AT5G02070, AT3G45970, AT1G73620, AT1G29980, AT4G13710, AT1G09850, AT4G17030, AT1G02460, AT4G16260, AT5G57260, AT2G28100, AT4G28940, AT5G63180, AT1G13130, AT1G62660, AT1G70520, AT5G61480, AT2G37870, AT1G66180, AT5G24090, AT1G21270, AT4G37250, AT2G36190, AT3G14240, AT5G22860, AT2G39700, AT5G25610, AT1G09560, AT4G21960, AT2…	258	804	9708	2.43365	4.99598e-07	2.49799e-07	2.35413e-07
UP_KEYWORDS	Secreted	23	8.84615	4.74607e-08	AT1G11580, AT5G66390, AT2G39700, AT1G60590, AT4G25810, AT1G09560, AT1G05260, AT5G49830, AT4G21960, AT5G08260, AT5G06390, AT5G24090, AT1G70710, AT2G17230, AT3G61490, AT1G49570, AT2G36190, AT1G75750, AT3G14240, AT4G17030, AT4G16260, AT1G02460, AT2G28100	258	214	9708	4.04412	9.06495e-06	3.02166e-06	2.84764e-06
UP_SEQ_FEATURE	signal peptide	33	12.6923	2.19597e-07	AT1G11580, AT2G39700, AT5G46330, AT5G25610, AT1G09560, AT1G05260, AT4G21960, AT5G08260, AT1G70710, AT4G24450, AT2G18370, AT1G49570, AT5G02070, AT3G45970, AT2G40090, AT4G13710, AT4G17030, AT2G28100, AT1G15950, AT5G63180, AT5G66390, AT3G56100, AT4G25810, AT4G08850, AT1G70520, AT5G61480, AT5G06390, AT5G24090, AT1G21270, AT4G37250, AT2G36190, AT1G75750, AT2G28630	132	327	3464	2.64832	7.00489e-05	7.0271e-05	6.98318e-05
UP_KEYWORDS	Glycoprotein	31	11.9231	0.000220387	AT5G46330, AT3G57420, AT1G09560, AT1G05260, AT4G21960, AT2G36570, AT5G08260, AT1G70710, AT2G17230, AT1G26850, AT1G49570, AT5G02070, AT3G45970, AT4G13710, AT4G17030, AT2G28100, AT1G76490, AT5G63180, AT5G66390, AT4G25810, AT1G62660, AT4G08850, AT1G70520, AT5G61480, AT5G06390, AT2G39750, AT1G21270, AT5G04060, AT4G37250, AT2G36190, AT3G14240	258	568	9708	2.05364	0.0412247	0.00701565	0.0066116
UP_SEQ_FEATURE	glycosylation site:N-linked (GlcNAc...)	25	9.61538	0.000839211	AT5G46330, AT1G09560, AT1G05260, AT4G21960, AT5G08260, AT1G70710, AT1G49570, AT5G02070, AT3G45970, AT4G13710, AT4G17030, AT2G28100, AT1G76490, AT1G15950, AT5G63180, AT5G66390, AT3G56100, AT4G25810, AT4G08850, AT1G70520, AT5G61480, AT5G06390, AT1G21270, AT4G37250, AT2G36190	132	324	3464	2.02488	0.234955	0.0856746	0.0851391
UP_KEYWORDS	Disulfide bond	17	6.53846	0.00410541	AT5G66390, AT2G39700, AT5G46330, AT4G25810, AT1G09560, AT1G05260, AT1G62660, AT4G21960, AT5G08260, AT5G24090, AT2G37870, AT3G20015, AT1G21270, AT2G18370, AT1G49570, AT2G36190, AT1G75750	258	288	9708	2.22109	0.544221	0.0722188	0.0680596
UP_SEQ_FEATURE	disulfide bond	12	4.61538	0.0172643	AT1G15950, AT1G21270, AT2G39700, AT2G18370, AT5G66390, AT1G49570, AT1G09560, AT2G36190, AT1G05260, AT4G21960, AT5G08260, AT5G24090	132	142	3464	2.21767	0.996133	0.789225	0.784292
Annotation Cluster 3	Enrichment Score: 3.653617582038615
Category	Term	Count	%	PValue	Genes	List Total	Pop Hits	Pop Total	Fold Enrichment	Bonferroni	Benjamini	FDR
KEGG_PATHWAY	ath00940:Phenylpropanoid biosynthesis	10	3.84615	8.13301e-06	AT1G15950, AT5G66390, AT1G49570, AT3G19450, AT1G51680, AT1G05260, AT4G21960, AT3G21240, AT3G10340, AT3G53260	79	45	2421	6.81013	0.000447217	0.000447315	0.000439182
UP_KEYWORDS	Phenylpropanoid metabolism	5	1.92308	5.44467e-05	AT5G17050, AT1G51680, AT3G21240, AT3G10340, AT3G53260	258	9	9708	20.9044	0.0103457	0.00259983	0.0024501
KEGG_PATHWAY	ath00360:Phenylalanine metabolism	4	1.53846	0.024713	AT1G51680, AT3G21240, AT3G10340, AT3G53260	79	20	2421	6.12911	0.747486	0.339803	0.333625
Annotation Cluster 4	Enrichment Score: 2.5480431595214745
Category	Term	Count	%	PValue	Genes	List Total	Pop Hits	Pop Total	Fold Enrichment	Bonferroni	Benjamini	FDR
UP_KEYWORDS	Oxidoreductase	28	10.7692	0.000198383	AT3G51240, AT4G31940, AT1G05260, AT4G21960, AT5G63450, AT1G64190, AT3G19820, AT1G74110, AT1G67090, AT1G49570, AT5G05320, AT3G61220, AT3G15020, AT5G57260, AT1G61720, AT1G76490, AT1G15950, AT1G14520, AT1G43800, AT5G66390, AT4G11600, AT4G22880, AT5G05690, AT3G19450, AT1G17020, AT5G07990, AT4G33010, AT5G42800	258	485	9708	2.17233	0.0371859	0.00701565	0.0066116
UP_KEYWORDS	Heme	11	4.23077	0.000328232	AT5G05690, AT1G74110, AT5G66390, AT1G49570, AT4G31940, AT1G05260, AT5G07990, AT5G42650, AT4G21960, AT5G63450, AT5G57260	258	101	9708	4.09809	0.0607772	0.00895604	0.00844024
GOTERM_MF_DIRECT	GO:0020037~heme binding	11	4.23077	0.000347919	AT5G05690, AT1G74110, AT5G66390, AT1G49570, AT4G31940, AT1G05260, AT5G07990, AT5G42650, AT4G21960, AT5G63450, AT5G57260	208	97	7421	4.04595	0.0775584	0.0562034	0.0547499
GOTERM_MF_DIRECT	GO:0004497~monooxygenase activity	8	3.07692	0.000484512	AT5G05690, AT1G67090, AT4G31940, AT5G05320, AT5G07990, AT5G42650, AT5G63450, AT5G57260	208	51	7421	5.59653	0.106344	0.0562034	0.0547499
KEGG_PATHWAY	ath01110:Biosynthesis of secondary metabolites	31	11.9231	0.000549968	AT3G03780, AT3G51240, AT5G17050, AT1G08250, AT1G05260, AT5G42650, AT4G21960, AT3G53260, AT1G64190, AT3G19820, AT1G49570, AT3G61220, AT3G15020, AT1G61720, AT1G76490, AT1G15950, AT5G66390, AT3G08860, AT3G21240, AT2G18950, AT4G22880, AT5G13930, AT5G05690, AT3G19450, AT5G07990, AT1G51680, AT2G28630, AT3G10340, AT4G33010, AT5G42800, AT5G59770	79	530	2421	1.79248	0.0298034	0.0100827	0.00989942
COG_ONTOLOGY	Secondary metabolites biosynthesis, transport, and catabolism	8	3.07692	0.000851437	AT5G13930, AT5G05690, AT1G74110, AT4G31940, AT5G07990, AT5G42650, AT5G63450, AT5G57260	33	65	1259	4.69557	0.00763688	0.00681149	0.00596006
UP_SEQ_FEATURE	metal ion-binding site:Iron (heme axial ligand)	8	3.07692	0.00167364	AT5G05690, AT5G66390, AT1G49570, AT1G05260, AT5G07990, AT5G42650, AT4G21960, AT5G57260	132	47	3464	4.4668	0.413943	0.107113	0.106444
UP_KEYWORDS	Monooxygenase	8	3.07692	0.00188483	AT5G05690, AT1G74110, AT1G67090, AT4G31940, AT5G05320, AT5G07990, AT5G63450, AT5G57260	258	67	9708	4.49288	0.302563	0.0400003	0.0376966
GOTERM_MF_DIRECT	GO:0019825~oxygen binding	7	2.69231	0.00225233	AT5G05690, AT1G74110, AT4G31940, AT5G07990, AT5G42650, AT5G63450, AT5G57260	208	49	7421	5.09684	0.407337	0.17418	0.169675
INTERPRO	IPR001128:Cytochrome P450	7	2.69231	0.00269618	AT5G05690, AT1G74110, AT4G31940, AT5G07990, AT5G42650, AT5G63450, AT5G57260	237	53	8863	4.93918	0.680828	0.294899	0.294202
UP_KEYWORDS	Iron	16	6.15385	0.00523248	AT1G14520, AT3G51240, AT1G43800, AT5G66390, AT4G31940, AT1G05260, AT5G42650, AT4G21960, AT5G63450, AT4G22880, AT1G74110, AT5G05690, AT1G49570, AT5G07990, AT1G17020, AT5G57260	258	269	9708	2.23809	0.632866	0.0722188	0.0680596
GOTERM_BP_DIRECT	GO:0044550~secondary metabolite biosynthetic process	5	1.92308	0.00710884	AT1G74110, AT4G31940, AT5G05320, AT5G07990, AT5G57260	222	26	7338	6.35655	0.932092	0.403907	0.402835
GOTERM_BP_DIRECT	GO:0055114~oxidation-reduction process	28	10.7692	0.00749959	AT3G51240, AT4G31940, AT1G31490, AT1G05260, AT5G42650, AT4G21960, AT5G63450, AT1G64190, AT3G19820, AT1G74110, AT1G67090, AT1G49570, AT5G05320, AT3G61220, AT5G57260, AT1G61720, AT1G15950, AT1G14520, AT1G43800, AT5G66390, AT4G11600, AT4G22880, AT5G05690, AT3G19450, AT1G17020, AT5G07990, AT4G33010, AT5G42800	222	549	7338	1.68582	0.941457	0.403907	0.402835
INTERPRO	IPR002401:Cytochrome P450, E-class, group I	6	2.30769	0.00864915	AT5G05690, AT1G74110, AT4G31940, AT5G07990, AT5G63450, AT5G57260	237	48	8863	4.67458	0.974638	0.478668	0.477536
GOTERM_MF_DIRECT	GO:0016705~oxidoreductase activity, acting on paired donors, with incorporation or reduction of molecular oxygen	6	2.30769	0.0104049	AT5G05690, AT4G31940, AT5G07990, AT5G42650, AT5G63450, AT5G57260	208	48	7421	4.45974	0.911663	0.258095	0.25142
GOTERM_MF_DIRECT	GO:0005506~iron ion binding	8	3.07692	0.0132944	AT1G14520, AT5G05690, AT1G74110, AT4G31940, AT5G07990, AT5G42650, AT5G63450, AT5G57260	208	91	7421	3.13652	0.955175	0.258095	0.25142
INTERPRO	IPR017972:Cytochrome P450, conserved site	5	1.92308	0.0334098	AT5G05690, AT1G74110, AT4G31940, AT5G07990, AT5G57260	237	46	8863	4.06485	0.999999	0.785131	0.783275
GOTERM_MF_DIRECT	GO:0016709~oxidoreductase activity, acting on paired donors, with incorporation or reduction of molecular oxygen, NAD(P)H as one donor, and incorporation of one atom of oxygen	3	1.15385	0.124352	AT1G74110, AT4G31940, AT5G57260	208	22	7421	4.86517	1	1	0.978355
Annotation Cluster 5	Enrichment Score: 2.299975121212698
Category	Term	Count	%	PValue	Genes	List Total	Pop Hits	Pop Total	Fold Enrichment	Bonferroni	Benjamini	FDR
KEGG_PATHWAY	ath00940:Phenylpropanoid biosynthesis	10	3.84615	8.13301e-06	AT1G15950, AT5G66390, AT1G49570, AT3G19450, AT1G51680, AT1G05260, AT4G21960, AT3G21240, AT3G10340, AT3G53260	79	45	2421	6.81013	0.000447217	0.000447315	0.000439182
UP_KEYWORDS	Heme	11	4.23077	0.000328232	AT5G05690, AT1G74110, AT5G66390, AT1G49570, AT4G31940, AT1G05260, AT5G07990, AT5G42650, AT4G21960, AT5G63450, AT5G57260	258	101	9708	4.09809	0.0607772	0.00895604	0.00844024
GOTERM_MF_DIRECT	GO:0020037~heme binding	11	4.23077	0.000347919	AT5G05690, AT1G74110, AT5G66390, AT1G49570, AT4G31940, AT1G05260, AT5G07990, AT5G42650, AT4G21960, AT5G63450, AT5G57260	208	97	7421	4.04595	0.0775584	0.0562034	0.0547499
UP_SEQ_FEATURE	metal ion-binding site:Calcium 1	5	1.92308	0.00107093	AT5G66390, AT1G49570, AT1G07670, AT1G05260, AT4G21960	132	13	3464	10.0932	0.289517	0.0856746	0.0851391
UP_SEQ_FEATURE	metal ion-binding site:Calcium 2	5	1.92308	0.00107093	AT5G66390, AT1G49570, AT1G07670, AT1G05260, AT4G21960	132	13	3464	10.0932	0.289517	0.0856746	0.0851391
UP_SEQ_FEATURE	metal ion-binding site:Iron (heme axial ligand)	8	3.07692	0.00167364	AT5G05690, AT5G66390, AT1G49570, AT1G05260, AT5G07990, AT5G42650, AT4G21960, AT5G57260	132	47	3464	4.4668	0.413943	0.107113	0.106444
INTERPRO	IPR000823:Plant peroxidase	4	1.53846	0.00262532	AT5G66390, AT1G49570, AT1G05260, AT4G21960	237	11	8863	13.5988	0.67109	0.294899	0.294202
UP_KEYWORDS	Calcium	11	4.23077	0.00419879	AT1G21270, AT5G63180, AT3G03430, AT5G66390, AT1G49570, AT3G51860, AT1G07670, AT4G13710, AT1G05260, AT4G21960, AT2G38750	258	141	9708	2.93551	0.552311	0.0722188	0.0680596
UP_SEQ_FEATURE	metal ion-binding site:Calcium 1; via carbonyl oxygen	4	1.53846	0.00697893	AT5G66390, AT1G49570, AT1G05260, AT4G21960	132	11	3464	9.5427	0.89291	0.372209	0.369883
INTERPRO	IPR002016:Haem peroxidase, plant/fungal/bacterial	4	1.53846	0.00961625	AT5G66390, AT1G49570, AT1G05260, AT4G21960	237	17	8863	8.79921	0.983216	0.478668	0.477536
GOTERM_BP_DIRECT	GO:0006979~response to oxidative stress	10	3.84615	0.0105674	AT5G13930, AT5G66390, AT1G49570, AT3G08670, AT1G05260, AT4G21960, AT4G11600, AT5G19875, AT2G29500, AT3G53260	222	121	7338	2.73174	0.981778	0.497991	0.49667
INTERPRO	IPR010255:Haem peroxidase	4	1.53846	0.011316	AT5G66390, AT1G49570, AT1G05260, AT4G21960	237	18	8863	8.31036	0.991884	0.478668	0.477536
UP_KEYWORDS	Hydrogen peroxide	4	1.53846	0.0129828	AT5G66390, AT1G49570, AT1G05260, AT4G21960	258	19	9708	7.92166	0.917582	0.165314	0.155793
UP_KEYWORDS	Peroxidase	5	1.92308	0.0244319	AT5G66390, AT1G49570, AT1G05260, AT4G21960, AT4G11600	258	42	9708	4.47951	0.991124	0.274499	0.258691
UP_SEQ_FEATURE	binding site:Substrate; via carbonyl oxygen	4	1.53846	0.0328769	AT5G66390, AT1G49570, AT1G05260, AT4G21960	132	19	3464	5.52472	0.999977	1	0.996865
GOTERM_BP_DIRECT	GO:0042744~hydrogen peroxide catabolic process	4	1.53846	0.0342269	AT5G66390, AT1G49570, AT1G05260, AT4G21960	222	24	7338	5.50901	0.999998	0.904856	0.902456
INTERPRO	IPR019793:Peroxidases heam-ligand binding site	3	1.15385	0.0590341	AT5G66390, AT1G49570, AT1G05260	237	15	8863	7.47932	1	0.91395	0.91179
GOTERM_MF_DIRECT	GO:0004601~peroxidase activity	4	1.53846	0.0680137	AT5G66390, AT1G49570, AT1G05260, AT4G21960	208	34	7421	4.1974	1	0.874094	0.851488
UP_SEQ_FEATURE	site:Transition state stabilizer	5	1.92308	0.0883753	AT1G11580, AT5G66390, AT1G49570, AT1G05260, AT4G21960	132	45	3464	2.91582	1	1	0.996865
Annotation Cluster 6	Enrichment Score: 2.067834143414075
Category	Term	Count	%	PValue	Genes	List Total	Pop Hits	Pop Total	Fold Enrichment	Bonferroni	Benjamini	FDR
UP_KEYWORDS	Phenylpropanoid metabolism	5	1.92308	5.44467e-05	AT5G17050, AT1G51680, AT3G21240, AT3G10340, AT3G53260	258	9	9708	20.9044	0.0103457	0.00259983	0.0024501
GOTERM_BP_DIRECT	GO:0009698~phenylpropanoid metabolic process	3	1.15385	0.0415231	AT5G17050, AT1G51680, AT3G21240	222	11	7338	9.01474	1	0.920835	0.918392
GOTERM_BP_DIRECT	GO:0008152~metabolic process	6	2.30769	0.276845	AT5G06570, AT5G17050, AT1G76990, AT1G51680, AT3G14240, AT3G21240	222	117	7338	1.69508	1	1	1
Annotation Cluster 7	Enrichment Score: 1.810244128797601
Category	Term	Count	%	PValue	Genes	List Total	Pop Hits	Pop Total	Fold Enrichment	Bonferroni	Benjamini	FDR
UP_KEYWORDS	Glycosidase	12	4.61538	0.000609719	AT3G61490, AT1G60590, AT1G13130, AT4G25810, AT2G36190, AT1G62660, AT1G76130, AT4G16260, AT1G02460, AT5G24090, AT2G28100, AT1G70710	258	129	9708	3.50027	0.109963	0.014557	0.0137187
GOTERM_MF_DIRECT	GO:0004553~hydrolase activity, hydrolyzing O-glycosyl compounds	8	3.07692	0.00720519	AT1G13130, AT4G25810, AT2G36190, AT1G62660, AT1G55740, AT4G16260, AT5G24090, AT1G70710	208	81	7421	3.52374	0.813189	0.258095	0.25142
GOTERM_BP_DIRECT	GO:0005975~carbohydrate metabolic process	11	4.23077	0.0183807	AT3G61490, AT1G60590, AT1G13130, AT3G15020, AT1G76130, AT1G55740, AT4G16260, AT1G02460, AT5G24090, AT2G28100, AT4G24450	222	155	7338	2.34577	0.999083	0.57746	0.575928
INTERPRO	IPR017853:Glycoside hydrolase, superfamily	6	2.30769	0.0950176	AT1G13130, AT1G76130, AT1G55740, AT4G16260, AT5G24090, AT2G28100	237	91	8863	2.46571	1	1	1
INTERPRO	IPR013781:Glycoside hydrolase, catalytic domain	5	1.92308	0.115835	AT1G13130, AT1G76130, AT4G16260, AT5G24090, AT2G28100	237	70	8863	2.67119	1	1	1
Annotation Cluster 8	Enrichment Score: 1.6150407260857844
Category	Term	Count	%	PValue	Genes	List Total	Pop Hits	Pop Total	Fold Enrichment	Bonferroni	Benjamini	FDR
GOTERM_MF_DIRECT	GO:0001135~transcription factor activity, RNA polymerase II transcription factor recruiting	6	2.30769	0.00654202	AT2G46410, AT2G02820, AT3G50060, AT5G35550, AT5G49330, AT1G17950	208	43	7421	4.97831	0.781885	0.258095	0.25142
INTERPRO	IPR001005:SANT/Myb domain	9	3.46154	0.00680807	AT2G46410, AT2G02820, AT3G50060, AT2G03500, AT2G25180, AT5G35550, AT1G75250, AT5G49330, AT1G17950	237	105	8863	3.20542	0.944405	0.478668	0.477536
INTERPRO	IPR009057:Homeodomain-like	11	4.23077	0.0076599	AT2G46410, AT2G02820, AT3G50060, AT4G08150, AT2G03500, AT1G62360, AT2G25180, AT5G35550, AT1G75250, AT5G49330, AT1G17950	237	153	8863	2.68865	0.961327	0.478668	0.477536
GOTERM_MF_DIRECT	GO:0000981~RNA polymerase II transcription factor activity, sequence-specific DNA binding	6	2.30769	0.0079394	AT2G46410, AT2G02820, AT3G50060, AT5G35550, AT5G49330, AT1G17950	208	45	7421	4.75705	0.842652	0.258095	0.25142
SMART	SM00717:SANT	7	2.69231	0.0152725	AT2G46410, AT2G02820, AT3G50060, AT5G35550, AT1G75250, AT5G49330, AT1G17950	84	82	3339	3.39329	0.64885	1	1
INTERPRO	IPR017930:Myb domain	7	2.69231	0.0164558	AT2G02820, AT3G50060, AT2G03500, AT2G25180, AT5G35550, AT5G49330, AT1G17950	237	77	8863	3.39969	0.999105	0.6328	0.631304
GOTERM_MF_DIRECT	GO:0044212~transcription regulatory region DNA binding	8	3.07692	0.0351671	AT2G46410, AT2G02820, AT3G50060, AT5G35550, AT5G49330, AT3G50410, AT1G17950, AT4G39410	208	111	7421	2.57138	0.999753	0.543918	0.529851
GOTERM_MF_DIRECT	GO:0043565~sequence-specific DNA binding	12	4.61538	0.0715853	AT2G46410, AT2G02820, AT3G50060, AT4G08150, AT2G03500, AT1G62360, AT5G35550, AT4G18170, AT5G62020, AT5G49330, AT1G17950, AT4G39410	208	240	7421	1.78389	1	0.874094	0.851488
GOTERM_BP_DIRECT	GO:0006357~regulation of transcription from RNA polymerase II promoter	6	2.30769	0.100566	AT2G46410, AT2G02820, AT3G50060, AT5G35550, AT5G49330, AT1G17950	222	82	7338	2.41859	1	1	1
GOTERM_BP_DIRECT	GO:0030154~cell differentiation	5	1.92308	0.410399	AT2G46410, AT3G50060, AT5G35550, AT5G49330, AT1G17950	222	108	7338	1.53028	1	1	1
Annotation Cluster 9	Enrichment Score: 1.4381861270540388
Category	Term	Count	%	PValue	Genes	List Total	Pop Hits	Pop Total	Fold Enrichment	Bonferroni	Benjamini	FDR
INTERPRO	IPR001509:NAD-dependent epimerase/dehydratase	4	1.53846	0.011316	AT1G15950, AT5G19440, AT5G42800, AT1G61720	237	18	8863	8.31036	0.991884	0.478668	0.477536
GOTERM_MF_DIRECT	GO:0050662~coenzyme binding	4	1.53846	0.0128108	AT1G15950, AT5G19440, AT5G42800, AT1G61720	208	18	7421	7.92842	0.949779	0.258095	0.25142
COG_ONTOLOGY	Cell envelope biogenesis, outer membrane / Carbohydrate transport and metabolism	4	1.53846	0.0448705	AT1G15950, AT5G19440, AT5G42800, AT1G61720	33	32	1259	4.76894	0.338454	0.179482	0.157047
INTERPRO	IPR016040:NAD(P)-binding domain	8	3.07692	0.271658	AT1G15950, AT5G19440, AT3G19450, AT3G61220, AT3G15020, AT1G64190, AT5G42800, AT1G61720	237	197	8863	1.51864	1	1	1
Annotation Cluster 10	Enrichment Score: 1.435924592027244
Category	Term	Count	%	PValue	Genes	List Total	Pop Hits	Pop Total	Fold Enrichment	Bonferroni	Benjamini	FDR
GOTERM_MF_DIRECT	GO:0008289~lipid binding	6	2.30769	0.00721712	AT5G13930, AT2G18370, AT1G30690, AT3G51670, AT5G05960, AT2G37870	208	44	7421	4.86517	0.813709	0.258095	0.25142
INTERPRO	IPR016140:Bifunctional inhibitor/plant lipid transfer protein/seed storage helical domain	3	1.15385	0.0331447	AT2G18370, AT5G05960, AT2G37870	237	11	8863	10.1991	0.999999	0.785131	0.783275
GOTERM_BP_DIRECT	GO:0006869~lipid transport	3	1.15385	0.205801	AT2G18370, AT5G05960, AT2G37870	222	28	7338	3.54151	1	1	1
Annotation Cluster 11	Enrichment Score: 1.4142677361532199
Category	Term	Count	%	PValue	Genes	List Total	Pop Hits	Pop Total	Fold Enrichment	Bonferroni	Benjamini	FDR
INTERPRO	IPR011050:Pectin lyase fold/virulence factor	6	2.30769	0.00278865	AT3G61490, AT1G11580, AT5G63180, AT1G60590, AT4G13710, AT1G02460	237	37	8863	6.06432	0.693104	0.294899	0.294202
INTERPRO	IPR012334:Pectin lyase fold	6	2.30769	0.00278865	AT3G61490, AT1G11580, AT5G63180, AT1G60590, AT4G13710, AT1G02460	237	37	8863	6.06432	0.693104	0.294899	0.294202
SMART	SM00710:PbH1	3	1.15385	0.0342828	AT3G61490, AT1G60590, AT1G02460	84	12	3339	9.9375	0.906718	1	1
UP_KEYWORDS	Cell wall biogenesis/degradation	9	3.46154	0.0360762	AT3G61490, AT1G11580, AT1G75500, AT2G39700, AT1G60590, AT4G25810, AT1G02460, AT4G31590, AT1G70710	258	143	9708	2.36819	0.999104	0.344527	0.324686
INTERPRO	IPR006626:Parallel beta-helix repeat	3	1.15385	0.0390872	AT3G61490, AT1G60590, AT1G02460	237	12	8863	9.34916	1	0.826695	0.82474
INTERPRO	IPR000743:Glycoside hydrolase, family 28	3	1.15385	0.0453986	AT3G61490, AT1G60590, AT1G02460	237	13	8863	8.62999	1	0.872891	0.870827
GOTERM_MF_DIRECT	GO:0016829~lyase activity	4	1.53846	0.0632624	AT5G63180, AT1G60590, AT4G13710, AT1G02460	208	33	7421	4.32459	1	0.874094	0.851488
GOTERM_MF_DIRECT	GO:0004650~polygalacturonase activity	3	1.15385	0.0640675	AT3G61490, AT1G60590, AT1G02460	208	15	7421	7.13558	1	0.874094	0.851488
GOTERM_BP_DIRECT	GO:0071555~cell wall organization	7	2.69231	0.125157	AT3G61490, AT1G75500, AT1G60590, AT4G25810, AT2G18950, AT1G02460, AT4G31590	222	113	7338	2.0476	1	1	1
GOTERM_BP_DIRECT	GO:0045490~pectin catabolic process	3	1.15385	0.140901	AT1G11580, AT5G63180, AT4G13710	222	22	7338	4.50737	1	1	1
KEGG_PATHWAY	ath00040:Pentose and glucuronate interconversions	3	1.15385	0.227375	AT1G11580, AT5G63180, AT4G13710	79	28	2421	3.28345	0.999999	1	1
Annotation Cluster 12	Enrichment Score: 1.3767974877846438
Category	Term	Count	%	PValue	Genes	List Total	Pop Hits	Pop Total	Fold Enrichment	Bonferroni	Benjamini	FDR
INTERPRO	IPR007112:Expansin/pollen allergen, DPBB domain	3	1.15385	0.0331447	AT2G39700, AT3G45970, AT4G17030	237	11	8863	10.1991	0.999999	0.785131	0.783275
INTERPRO	IPR007117:Expansin, cellulose-binding-like domain	3	1.15385	0.0331447	AT2G39700, AT3G45970, AT4G17030	237	11	8863	10.1991	0.999999	0.785131	0.783275
INTERPRO	IPR007118:Expansin/Lol pI	3	1.15385	0.0331447	AT2G39700, AT3G45970, AT4G17030	237	11	8863	10.1991	0.999999	0.785131	0.783275
INTERPRO	IPR009009:Barwin-related endoglucanase	3	1.15385	0.0390872	AT2G39700, AT3G45970, AT4G17030	237	12	8863	9.34916	1	0.826695	0.82474
GOTERM_BP_DIRECT	GO:0009828~plant-type cell wall loosening	3	1.15385	0.0415231	AT2G39700, AT3G45970, AT4G17030	222	11	7338	9.01474	1	0.920835	0.918392
UP_SEQ_FEATURE	domain:Expansin-like CBD	3	1.15385	0.0624346	AT2G39700, AT3G45970, AT4G17030	132	11	3464	7.15702	1	1	0.996865
UP_SEQ_FEATURE	domain:Expansin-like EG45	3	1.15385	0.0624346	AT2G39700, AT3G45970, AT4G17030	132	11	3464	7.15702	1	1	0.996865
Annotation Cluster 13	Enrichment Score: 1.1862011285059162
Category	Term	Count	%	PValue	Genes	List Total	Pop Hits	Pop Total	Fold Enrichment	Bonferroni	Benjamini	FDR
GOTERM_CC_DIRECT	GO:0022627~cytosolic small ribosomal subunit	7	2.69231	0.00194462	AT5G10360, AT4G34555, AT5G15520, AT1G48830, AT2G32060, AT5G28060, AT5G59240	251	50	9440	5.26534	0.149185	0.0403508	0.0384062
GOTERM_CC_DIRECT	GO:0005840~ribosome	11	4.23077	0.0213272	AT4G14320, AT3G49010, AT3G52590, AT5G10360, AT4G34555, AT5G15520, AT1G48830, AT2G32060, AT3G04400, AT5G28060, AT5G59240	251	180	9440	2.29836	0.832924	0.22127	0.210606
UP_KEYWORDS	Ribosomal protein	11	4.23077	0.0304909	AT4G14320, AT3G49010, AT3G52590, AT5G10360, AT4G34555, AT5G15520, AT1G48830, AT2G32060, AT3G04400, AT5G28060, AT5G59240	258	191	9708	2.16705	0.9973	0.323542	0.304909
KEGG_PATHWAY	ath03010:Ribosome	11	4.23077	0.0338112	AT4G14320, AT3G49010, AT3G52590, AT5G10360, AT4G34555, AT5G15520, AT1G48830, AT2G32060, AT3G04400, AT5G28060, AT5G59240	79	163	2421	2.06811	0.849197	0.371923	0.365161
GOTERM_CC_DIRECT	GO:0022626~cytosolic ribosome	7	2.69231	0.0691419	AT1G67090, AT3G49010, AT5G10360, AT1G48830, AT2G32060, AT5G28060, AT5G59240	251	109	9440	2.41529	0.997386	0.521707	0.496564
GOTERM_MF_DIRECT	GO:0003735~structural constituent of ribosome	11	4.23077	0.106782	AT4G14320, AT3G49010, AT3G52590, AT5G10360, AT4G34555, AT5G15520, AT1G48830, AT2G32060, AT3G04400, AT5G28060, AT5G59240	208	229	7421	1.71378	1	1	0.978355
[truncated: 161 more rows]

## Sheet: Table_S6
Table S6. Functional annotations and annotation clusters using the default annotations at medium stringency in the DAVID database for female-biased genes in Leucadendron.
[truncated: 230 more rows]

[truncated: 2 more sheets: Table_S7, Table_S8]
