# Supplementary figures and images for: High rates of evolution preceded shifts to sex-biased gene expression in Leucadendron, the most sexually dimorphic angiosperms
Source: eLife journal article supplement (doi:10.7554/elife.67485), 2021-11-02

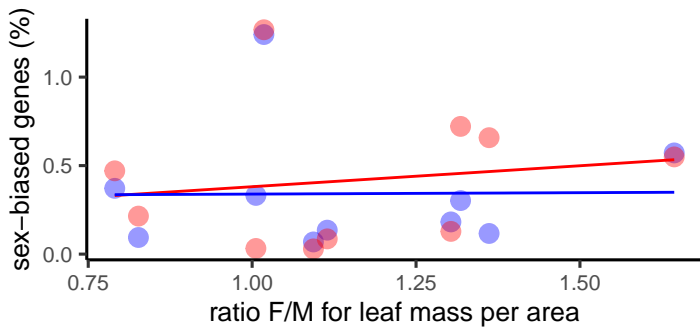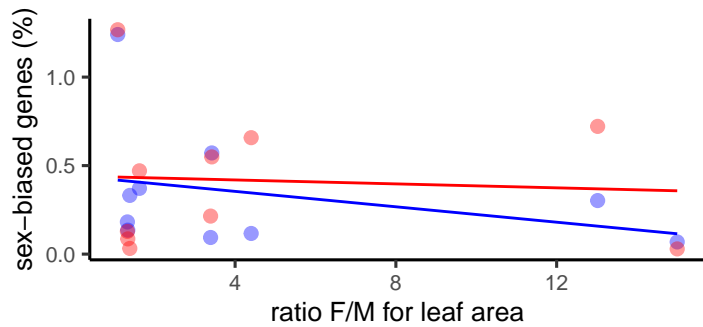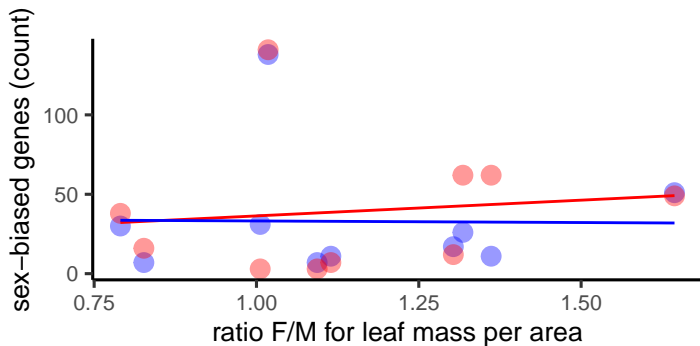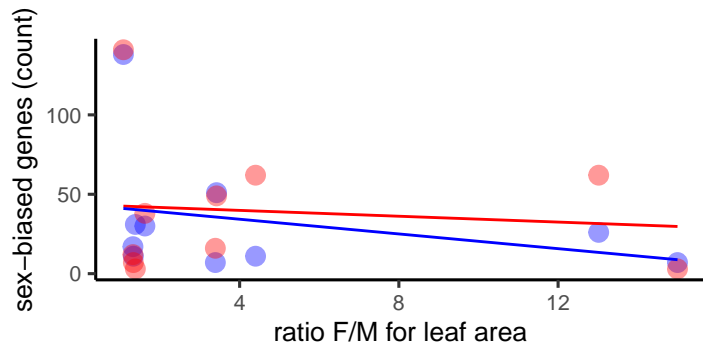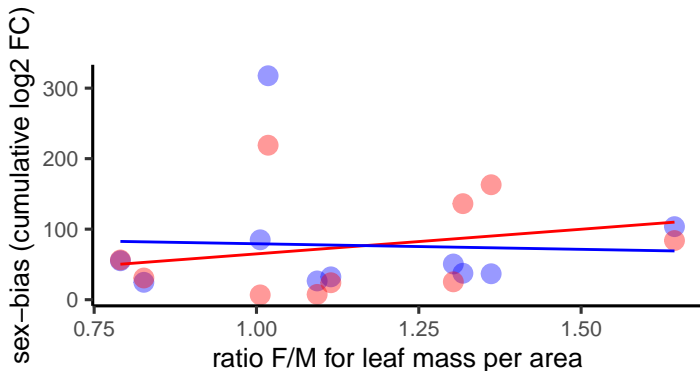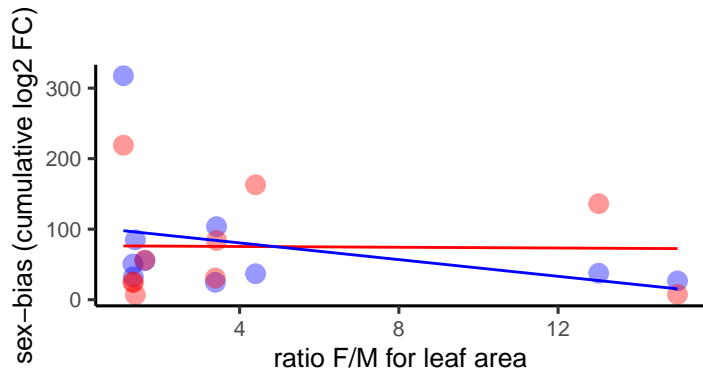

Supplement: supp [file elife_poa_e67485_Figure_2_figure_supplement_1.pdf › elife_poa_e67485_Figure_2_figure_supplement_1.pdf]

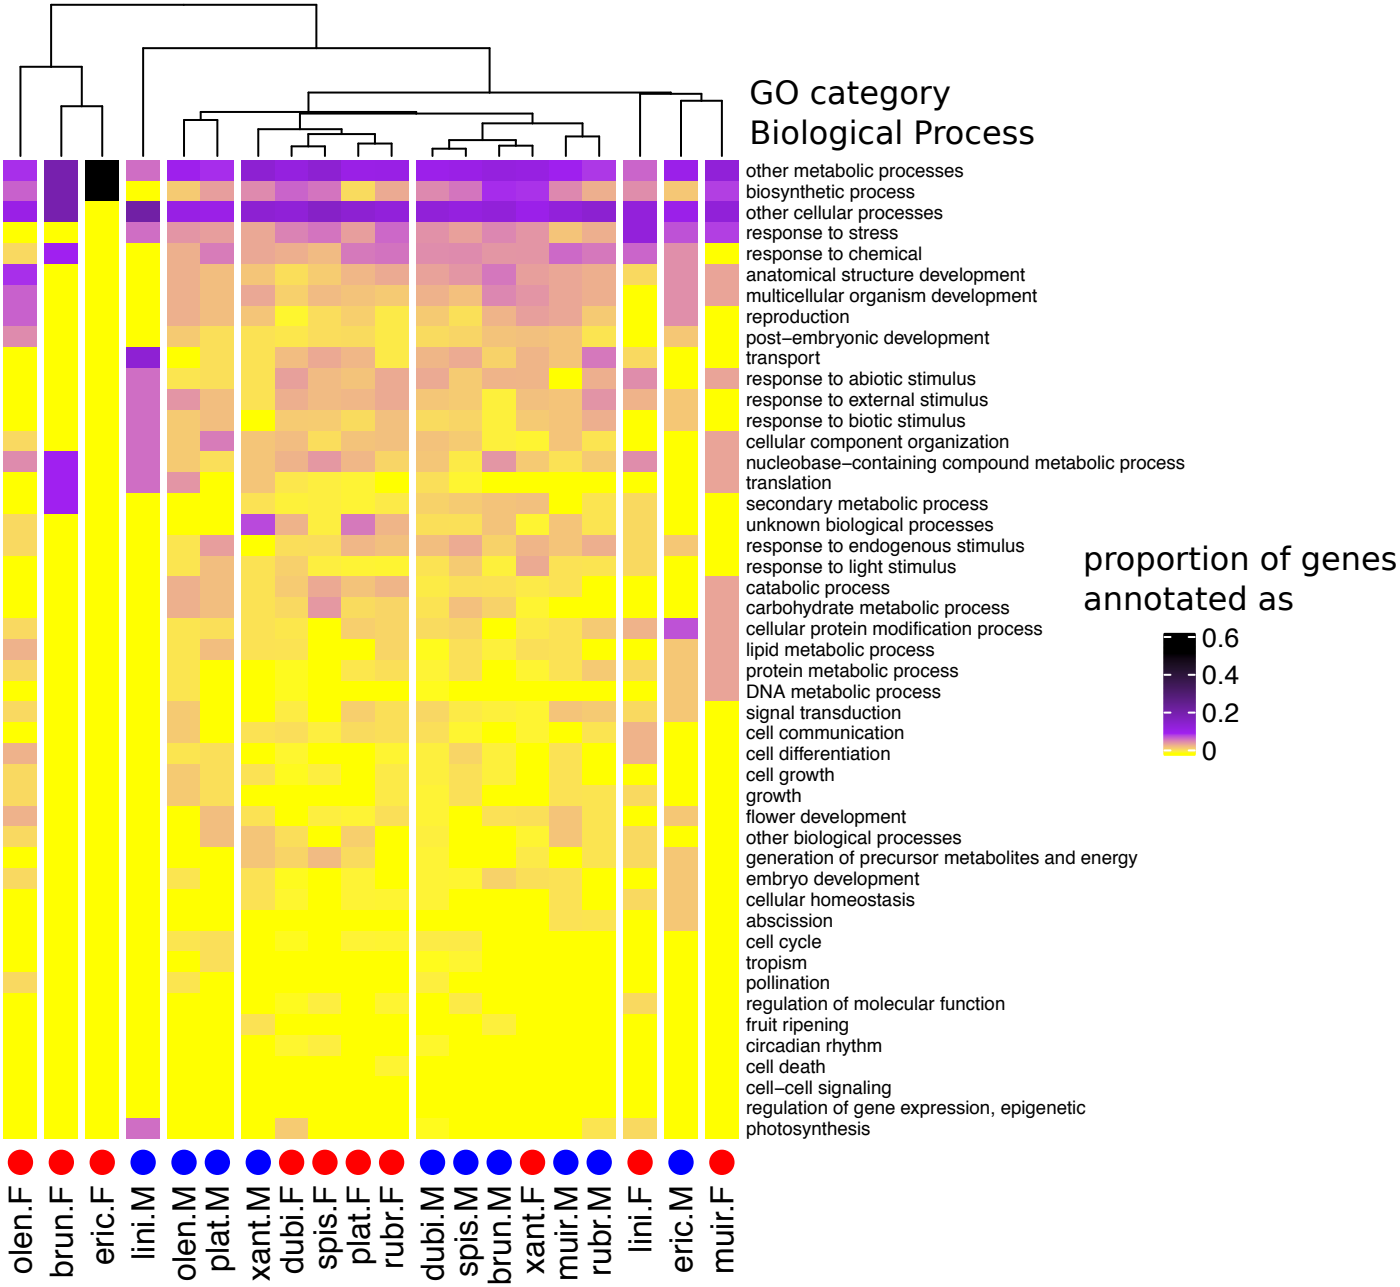

Supplement: supp [file elife_poa_e67485_Figure_2_figure_supplement_2.pdf › elife_poa_e67485_Figure_2_figure_supplement_2.pdf]

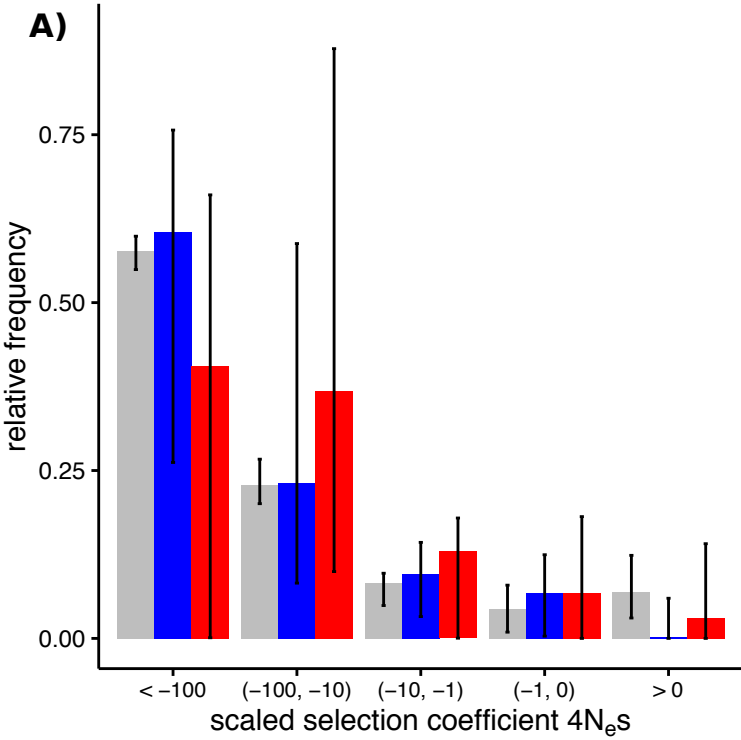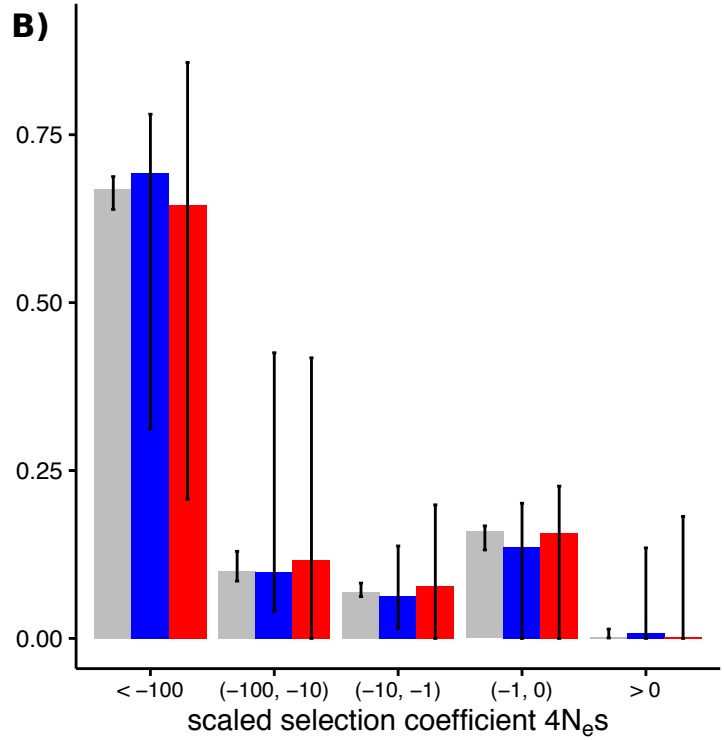

Supplement: supp [file elife_poa_e67485_Figure_5_figure_supplement_1.pdf › elife_poa_e67485_Figure_5_figure_supplement_1.pdf]

# intra-specific vs. inter-specific variation

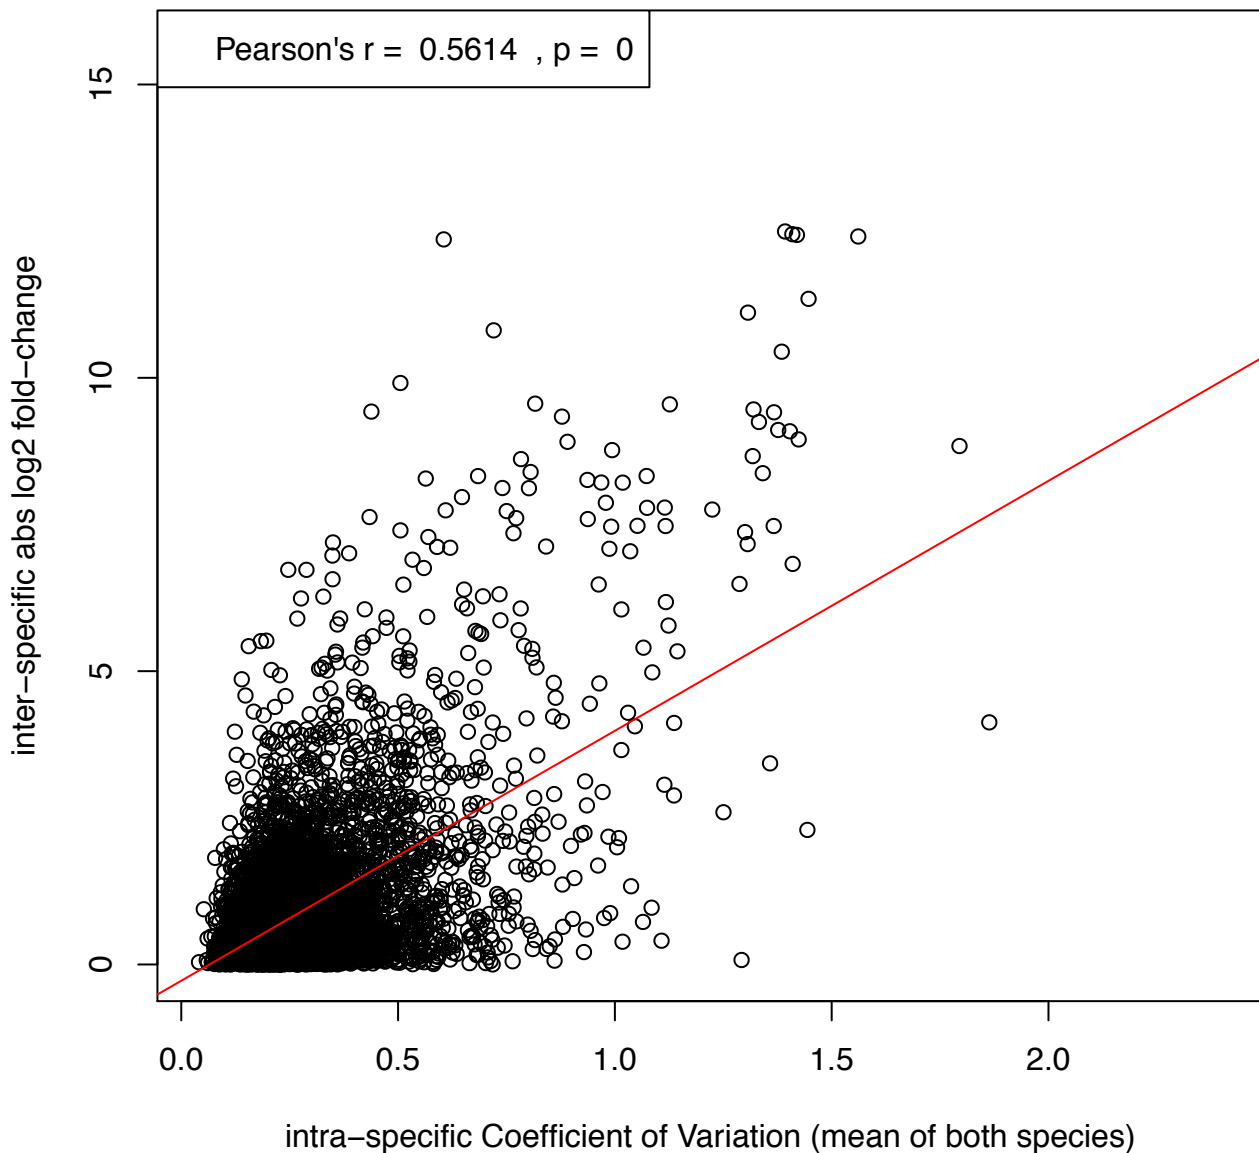

Supplement: supp [file elife_poa_e67485_Figure_6_figure_supplement_1.pdf › elife_poa_e67485_Figure_6_figure_supplement_1.pdf]

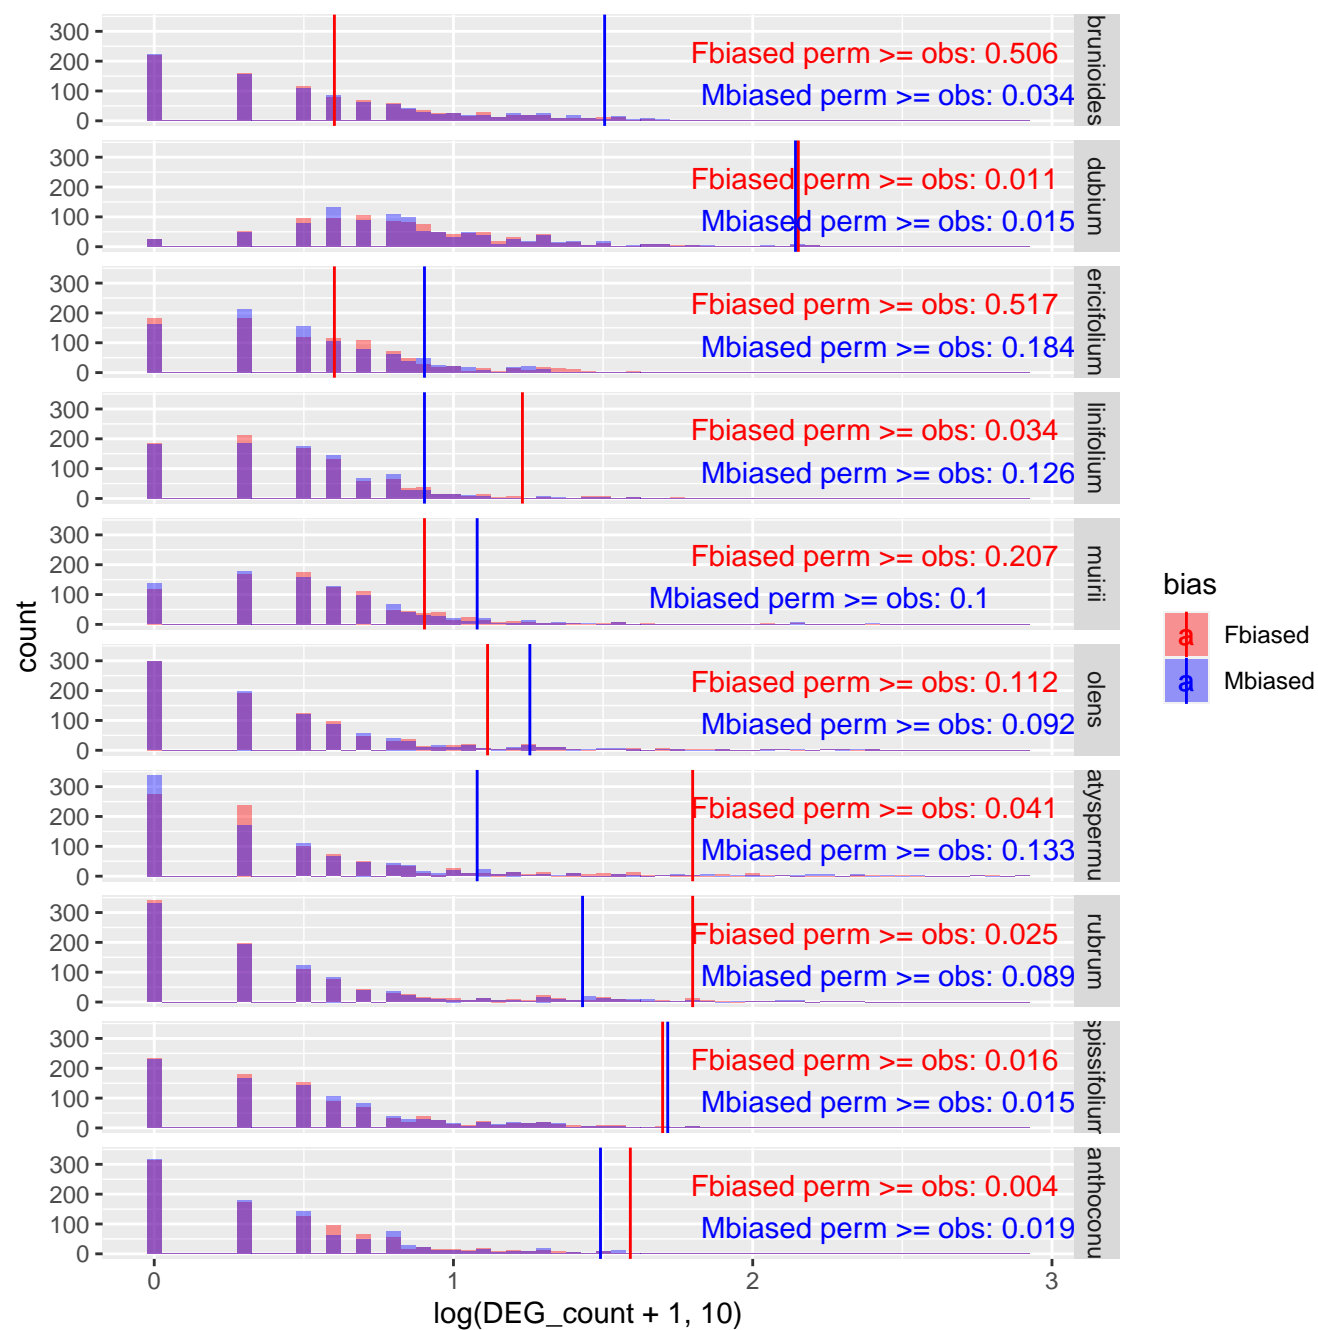

Supplement: supp [file elife_poa_e67485_Figure_6_figure_supplement_2.pdf › elife_poa_e67485_Figure_6_figure_supplement_2.pdf]

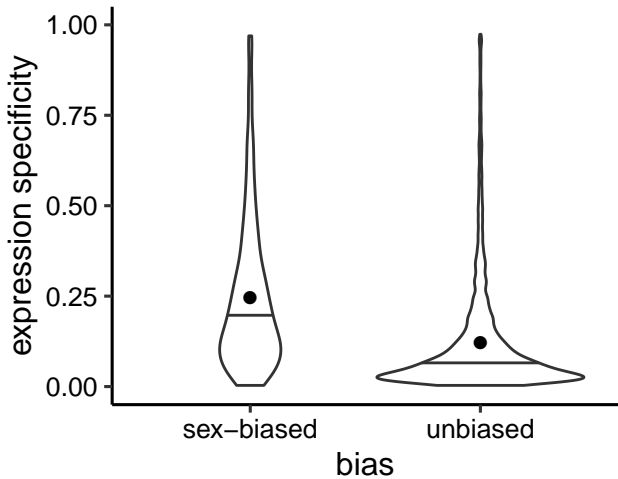

Supplement: supp [file elife_poa_e67485_Figure_6_figure_supplement_3.pdf › elife_poa_e67485_Figure_6_figure_supplement_3.pdf]
